# Supplementary material for: Glioma IL13Rα2 Is Associated with Mesenchymal Signature Gene Expression and Poor Patient Prognosis
Source: PLoS One. 2013 Oct 18;8(10):e77769. doi: 10.1371/journal.pone.0077769 (PMC3800130; doi:10.1371/journal.pone.0077769)
Supplement: File S2 — Datasets S1-S7. Dataset S1, Probes for TCGA signature genes correlated with IL13Rα2. Dataset S2, Probes for Philips signature genes correlated with IL13Rα2. Dataset S3, Gene Signature Probes used for TCGA Subtypes. Dataset S4, Gene Signature Probes used for Phillips Subtypes. Dataset S5, Dataset S5: Number of Significant Correlations per Gene in Eight Study Cohorts. Dataset S6, Differential gene expression statistics for IL13Rα2-positive versus ‑negative cell lines. Dataset S7, Genome-wide survival analysis. (XLSX) [file pone.0077769.s002.xlsx]

## Sheet: ToC
Dataset	Worksheet	Description
Dataset S1	Verhaak_Gene_Cor	Probes for TCGA signature genes correlated with IL13Ra2 across 8 study cohorts (including TCGA). Correlations are calculated per probe per array per cohort. Cohort-based correlation counts (using a single array per cohort) are presented in Dataset S5. For example, "Number of Comparisons" for TRIP6 is 22 because the HG-U133A array has 2 TRIP6 probes (TCGA, Freije, Phillips, Lee, Petalidis), the HG…
Dataset S2	Phillips_Gene_Cor	Probes for Philips et al. signature genes correlated with IL13Ra2 across 8 cohorts (including Phillips et al.) Correlations are calculated per probe per array per cohort. dA201G10-1 (Proneural signature gene) is not present in this table because the corresponding probe (232833_at) does not have a known gene mapped in the array annotation files.
Dataset S3	TCGA_Signature_Genes	List of Affymetrix probes and associated molecular subtype used for comparison in other study cohorts.
Dataset S4	Phillips_Signature_Genes	List of Affymetrix probes and associated molecular subtype used for PCA plot (U133A + U133B) and correlation plots (U133A only).
Dataset S5	Patient_Cor_Stat	Number of significant correlations per gene (out of a total of 8 patient cohorts) and average significant correlation per gene, using one representative Affymetrix array per cohort (for the 8 patient cohorts). Genes displaying positive correlation with IL13Rα2 in 4 of 8 cohorts were used for IPA analysis. Cohorts with statistically significant correlations for the same gene for different probes o…
Dataset S6	Cell_Line_Stats	Differential expression statistics (fold-change, p-value, and FDR) for all probes from the HG-U133 Plus 2.0 array. 2-way ANOVA was used to correct for potential batch effects. FDR = false discovery rate / corrected p-value. Calculations are provided on a probe-level basis, so some genes have expression values reported in multiple rows.
Dataset S7	Combined_Cor	Genome-wide survival analysis. Log-rank p-values and false discovery rates (FDR) are presented for overall survival statistics for each probe. Calculations are provided on a probe-level basis, so some genes have expression values reported in multiple rows. Official gene symbols and entrez gene IDs are provided for each probe. Probes are in ascending order based upon p-value. Note that IL13Ra2 is …

## Sheet: S1 Verhaak_Gene_Cor
Dataset S1: Probes for TCGA signature genes correlated with IL13Rα2.
Gene	Subtype	Number of Comparisons	Number of positive correlations	Percent positive correlations	Number of negative correlations	Percent negative correlations
VDR	Mesenchymal	41	10	0.2439	3	0.0732
TRIP6	Classical	22	10	0.4545	0	0
MAGEH1	Neural	12	0	0	3	0.25
ANXA2	Mesenchymal	35	29	0.8286	0	0
KLHDC8A	Classical	16	6	0.375	0	0
MLC1	Classical	13	2	0.1538	1	0.0769
CENTD1	Classical	1	0	0	0	0
ITGAM	Mesenchymal	23	3	0.1304	1	0.0435
ITGA5	Mesenchymal	13	8	0.6154	0	0
C1orf106	Proneural	11	0	0	2	0.1818
PDPN	Mesenchymal	37	25	0.6757	0	0
CASQ1	Neural	11	2	0.1818	4	0.3636
WASF1	Proneural	13	0	0	7	0.5385
DLL3	Proneural	24	0	0	16	0.6667
ZNF45	Classical	21	7	0.3333	0	0
ENG	Mesenchymal	21	6	0.2857	0	0
ATP5F1	Neural	12	7	0.5833	0	0
NCF4	Mesenchymal	24	12	0.5	0	0
ADAM12	Mesenchymal	41	16	0.3902	0	0
SEC24D	Mesenchymal	30	19	0.6333	0	0
CNN2	Mesenchymal	12	0	0	1	0.0833
MPPED2	Proneural	22	0	0	8	0.3636
PLAU	Mesenchymal	22	9	0.4091	0	0
VEZF1	Proneural	31	3	0.0968	7	0.2258
DNM3	Proneural	21	0	0	13	0.619
ADD3	Neural	41	2	0.0488	18	0.439
ANXA1	Mesenchymal	17	15	0.8824	0	0
FBXO21	Proneural	32	0	0	13	0.4062
SLC6A11	Classical	16	1	0.0625	6	0.375
FCGR2A	Mesenchymal	22	9	0.4091	0	0
GRM3	Neural	12	1	0.0833	3	0.25
ATP1A3	Proneural	12	0	0	9	0.75
MAN1A1	Mesenchymal	21	5	0.2381	0	0
LILRB2	Mesenchymal	21	12	0.5714	0	0
P4HA2	Mesenchymal	14	11	0.7857	0	0
NOS2	Classical	14	0	0	1	0.0714
ROGDI	Neural	11	0	0	4	0.3636
MATR3	Proneural	49	1	0.0204	18	0.3673
EDIL3	Neural	26	1	0.0385	3	0.1154
EPB41	Proneural	30	1	0.0333	2	0.0667
NKAIN1	Proneural	11	0	0	6	0.5455
ZNF446	Classical	15	3	0.2	1	0.0667
STXBP2	Mesenchymal	16	2	0.125	1	0.0625
C19orf66	Classical	24	13	0.5417	0	0
CLGN	Proneural	12	3	0.25	0	0
HMGB3	Proneural	16	1	0.0625	0	0
TOPBP1	Proneural	12	2	0.1667	1	0.0833
ENPP4	Neural	22	6	0.2727	0	0
CYTH1	Neural	21	0	0	9	0.4286
KCNF1	Classical	12	0	0	7	0.5833
TMBIM1	Mesenchymal	12	9	0.75	0	0
HMG20B	Classical	31	3	0.0968	0	0
NOL4	Proneural	17	1	0.0588	5	0.2941
RP11-35N6.1	Proneural	15	0	0	4	0.2667
GADD45G	Proneural	13	0	0	3	0.2308
CD4	Mesenchymal	23	3	0.1304	3	0.1304
SQRDL	Mesenchymal	12	10	0.8333	0	0
BAI3	Proneural	23	0	0	20	0.8696
DAB2	Mesenchymal	52	17	0.3269	1	0.0192
FXYD6	Proneural	12	0	0	10	0.8333
ZNF248	Proneural	16	0	0	8	0.5
MARCKS	Proneural	43	3	0.0698	12	0.2791
PGCP	Mesenchymal	23	14	0.6087	0	0
LRP6	Proneural	25	0	0	6	0.24
RBCK1	Classical	22	5	0.2273	2	0.0909
FPR3	Mesenchymal	16	6	0.375	0	0
WSCD1	Classical	22	0	0	13	0.5909
SOX4	Proneural	52	0	0	13	0.25
ASL	Mesenchymal	18	7	0.3889	0	0
TSPAN3	Proneural	21	0	0	6	0.2857
CSNK1E	Proneural	32	0	0	10	0.3125
ALOX5	Mesenchymal	40	10	0.25	2	0.05
NRP1	Mesenchymal	35	19	0.5429	0	0
TRIM22	Mesenchymal	13	7	0.5385	0	0
LRRTM4	Proneural	12	0	0	6	0.5
GJA1	Classical	14	5	0.3571	0	0
CLCA4	Neural	11	0	0	3	0.2727
TCEAL2	Neural	12	0	0	1	0.0833
LHFPL2	Mesenchymal	12	7	0.5833	0	0
ATP5L	Neural	39	17	0.4359	2	0.0513
SHC1	Mesenchymal	32	17	0.5312	1	0.0312
BCAN	Proneural	41	2	0.0488	25	0.6098
PTPN22	Mesenchymal	34	11	0.3235	1	0.0294
SLC12A4	Classical	45	2	0.0444	7	0.1556
SCPEP1	Mesenchymal	16	11	0.6875	0	0
HS3ST3B1	Classical	20	2	0.1	0	0
TGFB3	Classical	19	1	0.0526	1	0.0526
ZNF510	Proneural	12	0	0	3	0.25
PCDH11Y	Proneural	21	0	0	5	0.2381
LPAR4	Proneural	12	2	0.1667	1	0.0833
CRYZL1	Neural	27	1	0.037	5	0.1852
SCAMP4	Classical	15	1	0.0667	2	0.1333
BASP1	Neural	13	0	0	2	0.1538
FCGR2B	Mesenchymal	14	10	0.7143	0	0
ACYP2	Neural	13	4	0.3077	0	0
SP100	Mesenchymal	54	35	0.6481	0	0
LYRM1	Neural	12	4	0.3333	0	0
C5AR1	Mesenchymal	11	8	0.7273	0	0
S100A4	Mesenchymal	14	11	0.7857	0	0
SMO	Classical	12	1	0.0833	0	0
ACSL3	Classical	32	1	0.0312	7	0.2188
CRYM	Neural	13	0	0	4	0.3077
CA4	Neural	21	4	0.1905	1	0.0476
KIAA1166	Proneural	1	0	0	0	0
PLCB4	Proneural	28	1	0.0357	8	0.2857
SEPP1	Neural	21	4	0.1905	0	0
SIGLEC9	Mesenchymal	11	4	0.3636	0	0
LAMB1	Mesenchymal	22	15	0.6818	0	0
ANXA3	Neural	12	0	0	1	0.0833
PYGL	Mesenchymal	13	10	0.7692	0	0
PAK7	Proneural	21	0	0	7	0.3333
LOC201229	Neural	10	1	0.1	1	0.1
CHD7	Proneural	29	0	0	15	0.5172
GRIK1	Classical	24	3	0.125	2	0.0833
SARS2	Classical	14	1	0.0714	3	0.2143
RAC2	Mesenchymal	23	12	0.5217	0	0
COL1A1	Mesenchymal	45	18	0.4	2	0.0444
TNRC4	Proneural	10	0	0	3	0.3
DGKI	Proneural	12	0	0	7	0.5833
RASGRP1	Classical	12	0	0	6	0.5
PLK3	Mesenchymal	20	7	0.35	0	0
TAF5	Proneural	17	0	0	4	0.2353
C1orf61	Proneural	32	0	0	22	0.6875
LILRB3	Mesenchymal	20	2	0.1	1	0.05
PLA2G5	Classical	31	7	0.2258	1	0.0323
SERPINI1	Neural	13	2	0.1538	4	0.3077
MS4A4A	Mesenchymal	20	13	0.65	0	0
GNAS	Classical	103	0	0	35	0.3398
SLC16A7	Neural	26	5	0.1923	2	0.0769
LY75	Mesenchymal	13	10	0.7692	0	0
ARHGEF9	Proneural	21	0	0	6	0.2857
AKT2	Classical	44	2	0.0455	10	0.2273
GNAI1	Neural	17	0	0	2	0.1176
EGFR	Classical	67	0	0	3	0.0448
MDH1	Neural	16	2	0.125	0	0
DCBLD2	Mesenchymal	29	6	0.2069	2	0.069
PPFIA2	Neural	20	1	0.05	5	0.25
FHOD1	Mesenchymal	11	2	0.1818	0	0
LRRC16	Classical	1	0	0	0	0
PGBD5	Neural	11	0	0	3	0.2727
NPC2	Mesenchymal	13	10	0.7692	0	0
LAIR1	Mesenchymal	22	13	0.5909	0	0
GSTK1	Classical	15	8	0.5333	0	0
EVI2A	Neural	13	3	0.2308	1	0.0769
PRKD2	Classical	25	8	0.32	2	0.08
RBPJ	Proneural	25	0	0	7	0.28
MSRB2	Neural	24	1	0.0417	9	0.375
SIRT5	Neural	46	0	0	7	0.1522
LGALS1	Mesenchymal	13	12	0.9231	0	0
FXYD5	Mesenchymal	16	7	0.4375	1	0.0625
RBM42	Classical	12	0	0	3	0.25
SRPX2	Mesenchymal	22	11	0.5	0	0
ACSBG1	Classical	22	0	0	12	0.5455
GRIK5	Classical	27	0	0	14	0.5185
FGF9	Proneural	17	0	0	8	0.4706
ERBB3	Proneural	39	0	0	8	0.2051
IGFBP6	Mesenchymal	12	3	0.25	0	0
SWAP70	Mesenchymal	31	12	0.3871	1	0.0323
PLCL1	Neural	17	0	0	4	0.2353
PRPF31	Classical	30	4	0.1333	4	0.1333
TPM3	Neural	28	5	0.1786	8	0.2857
GSTA4	Proneural	17	0	0	9	0.5294
SLC1A1	Proneural	23	0	0	10	0.4348
STAB1	Mesenchymal	30	10	0.3333	0	0
MGST3	Neural	16	6	0.375	0	0
LGALS3	Mesenchymal	17	7	0.4118	0	0
FUT9	Neural	32	1	0.0312	7	0.2188
CDKN1B	Proneural	14	0	0	3	0.2143
PLA2G15	Mesenchymal	12	3	0.25	0	0
ZNF286A	Proneural	28	0	0	2	0.0714
DOK3	Mesenchymal	15	5	0.3333	0	0
IQGAP1	Mesenchymal	31	28	0.9032	0	0
SORCS3	Proneural	13	1	0.0769	1	0.0769
PDGFA	Classical	23	1	0.0435	4	0.1739
CLEC2B	Mesenchymal	16	11	0.6875	0	0
MGAT1	Mesenchymal	12	5	0.4167	0	0
NPEPL1	Classical	33	10	0.303	4	0.1212
ZNF8	Classical	12	0	0	2	0.1667
VAX2	Proneural	11	0	0	5	0.4545
CNTN1	Proneural	26	1	0.0385	9	0.3462
CKB	Proneural	14	0	0	10	0.7143
ZNF211	Classical	12	1	0.0833	1	0.0833
MMP16	Proneural	45	0	0	19	0.4222
TEAD3	Classical	12	4	0.3333	1	0.0833
MEOX2	Classical	24	4	0.1667	1	0.0417
ALCAM	Proneural	22	0	0	9	0.4091
HPCA	Neural	13	0	0	3	0.2308
PDE6D	Neural	25	0	0	2	0.08
MYH9	Mesenchymal	13	4	0.3077	0	0
C1QL1	Proneural	22	0	0	11	0.5
QTRT1	Classical	11	0	0	4	0.3636
NCF2	Mesenchymal	13	8	0.6154	0	0
BDKRB2	Mesenchymal	14	6	0.4286	0	0
IFI30	Mesenchymal	14	11	0.7857	0	0
CA10	Proneural	15	0	0	8	0.5333
COPZ2	Mesenchymal	16	10	0.625	0	0
ADAM19	Classical	21	0	0	2	0.0952
TOX3	Proneural	35	0	0	8	0.2286
PTRF	Mesenchymal	26	12	0.4615	0	0
MGST2	Mesenchymal	13	10	0.7692	0	0
MMP15	Proneural	17	0	0	5	0.2941
MYBPC1	Neural	14	3	0.2143	0	0
ARHGAP29	Mesenchymal	25	4	0.16	0	0
C20orf42	Proneural	1	0	0	0	0
CDR1	Neural	14	0	0	6	0.4286
SLC30A10	Neural	11	0	0	1	0.0909
EMP3	Mesenchymal	13	13	1	0	0
C1orf38	Mesenchymal	22	10	0.4545	0	0
TBX2	Classical	39	3	0.0769	9	0.2308
PPP2R5A	Neural	21	0	0	9	0.4286
ELOVL2	Classical	22	1	0.0455	2	0.0909
HSPBP1	Classical	12	1	0.0833	3	0.25
KLRC3	Proneural	12	0	0	6	0.5
PURG	Proneural	15	0	0	5	0.3333
TNFAIP8	Mesenchymal	21	19	0.9048	0	0
EFEMP2	Mesenchymal	22	20	0.9091	0	0
SNX11	Neural	20	5	0.25	1	0.05
PODXL2	Proneural	11	0	0	5	0.4545
ABAT	Proneural	33	0	0	15	0.4545
RBM47	Mesenchymal	27	12	0.4444	2	0.0741
THBS1	Mesenchymal	58	25	0.431	0	0
LRFN3	Classical	11	0	0	4	0.3636
VAMP5	Mesenchymal	23	15	0.6522	0	0
ACSL1	Mesenchymal	22	10	0.4545	0	0
IRF3	Classical	12	4	0.3333	0	0
TMEM35	Proneural	11	1	0.0909	3	0.2727
HPRT1	Neural	17	7	0.4118	0	0
TNFRSF1B	Mesenchymal	14	2	0.1429	0	0
NR0B1	Proneural	21	0	0	2	0.0952
LTBP1	Mesenchymal	22	11	0.5	0	0
PHF16	Proneural	12	0	0	6	0.5
CRBN	Neural	15	1	0.0667	5	0.3333
SLC16A3	Mesenchymal	50	20	0.4	2	0.04
MYO5C	Classical	12	1	0.0833	0	0
CPNE6	Neural	21	2	0.0952	7	0.3333
VIP	Neural	13	0	0	3	0.2308
CASP8	Mesenchymal	27	12	0.4444	0	0
CAMSAP1L1	Proneural	30	0	0	18	0.6
KIAA0355	Classical	12	0	0	3	0.25
DPF1	Proneural	16	0	0	9	0.5625
TRIM38	Mesenchymal	31	13	0.4194	0	0
HDAC2	Proneural	16	2	0.125	1	0.0625
CDH2	Classical	23	3	0.1304	3	0.1304
TMCC1	Proneural	34	0	0	24	0.7059
GRID2	Proneural	11	0	0	6	0.5455
NCAM1	Proneural	57	0	0	26	0.4561
MAN2B1	Mesenchymal	13	6	0.4615	0	0
USP33	Neural	30	4	0.1333	1	0.0333
TGOLN2	Mesenchymal	46	18	0.3913	1	0.0217
FGFR3	Classical	22	0	0	11	0.5
SEMA6D	Classical	28	1	0.0357	7	0.25
MRPL49	Neural	12	3	0.25	0	0
MAPK13	Mesenchymal	21	9	0.4286	0	0
KCNJ3	Neural	21	0	0	5	0.2381
TEC	Mesenchymal	12	2	0.1667	0	0
RALGPS2	Proneural	23	5	0.2174	1	0.0435
ACTR1A	Proneural	21	0	0	7	0.3333
GPR22	Neural	15	0	0	5	0.3333
ARPC1B	Mesenchymal	12	9	0.75	0	0
BCAS1	Neural	20	0	0	3	0.15
CHI3L1	Mesenchymal	31	24	0.7742	0	0
EXTL3	Classical	21	0	0	4	0.1905
JAG1	Classical	45	5	0.1111	7	0.1556
SNCG	Neural	21	0	0	8	0.381
GLG1	Classical	31	2	0.0645	8	0.2581
TCIRG1	Mesenchymal	12	6	0.5	0	0
SH2B3	Mesenchymal	12	4	0.3333	1	0.0833
CDK5R1	Proneural	23	0	0	11	0.4783
GRN	Mesenchymal	31	19	0.6129	1	0.0323
DBN1	Proneural	21	0	0	2	0.0952
ZNF227	Classical	15	0	0	1	0.0667
BEX1	Proneural	12	0	0	9	0.75
DSC2	Mesenchymal	25	10	0.4	0	0
NTSR2	Neural	12	0	0	6	0.5
FEZF2	Neural	19	0	0	4	0.2105
SERPINA1	Mesenchymal	34	16	0.4706	1	0.0294
PIGP	Mesenchymal	11	6	0.5455	0	0
SPTBN2	Proneural	12	0	0	10	0.8333
MYO10	Proneural	33	0	0	15	0.4545
MCC	Classical	17	2	0.1176	0	0
MAP2	Proneural	21	0	0	12	0.5714
RAB32	Mesenchymal	17	14	0.8235	0	0
LHFP	Classical	16	0	0	1	0.0625
SPRY2	Classical	13	3	0.2308	0	0
TNFRSF11A	Mesenchymal	16	8	0.5	0	0
MAPT	Proneural	48	0	0	37	0.7708
AGTPBP1	Neural	26	3	0.1154	2	0.0769
TLE2	Classical	21	0	0	9	0.4286
VSX1	Neural	23	1	0.0435	3	0.1304
CSPG5	Proneural	21	0	0	17	0.8095
PTPN6	Mesenchymal	12	5	0.4167	0	0
PTPRA	Classical	33	0	0	15	0.4545
DYNC1I1	Neural	18	3	0.1667	2	0.1111
GPR56	Classical	22	0	0	8	0.3636
PDE10A	Proneural	31	0	0	1	0.0323
DUSP26	Proneural	12	0	0	7	0.5833
AKR7A3	Neural	21	6	0.2857	0	0
TMEM161A	Classical	20	1	0.05	5	0.25
ST14	Mesenchymal	30	4	0.1333	2	0.0667
TMEM144	Neural	28	3	0.1071	1	0.0357
ZEB2	Proneural	21	2	0.0952	2	0.0952
RHOG	Mesenchymal	12	3	0.25	1	0.0833
ZNF606	Classical	15	0	0	1	0.0667
HK3	Mesenchymal	12	5	0.4167	0	0
CRMP1	Proneural	13	0	0	9	0.6923
GNG7	Classical	27	0	0	5	0.1852
RUNX2	Mesenchymal	44	5	0.1136	6	0.1364
MYT1	Proneural	26	0	0	10	0.3846
ZNF711	Proneural	17	0	0	3	0.1765
CC2D1A	Classical	38	1	0.0263	5	0.1316
RAB11FIP1	Mesenchymal	19	4	0.2105	1	0.0526
COX5B	Neural	40	6	0.15	0	0
NR2F6	Classical	25	2	0.08	4	0.16
NR2E1	Classical	13	7	0.5385	0	0
MAFB	Mesenchymal	16	10	0.625	0	0
C1orf54	Mesenchymal	12	11	0.9167	0	0
THBD	Mesenchymal	25	16	0.64	0	0
ABCD2	Classical	12	1	0.0833	0	0
SCHIP1	Neural	13	0	0	4	0.3077
PFN2	Proneural	14	3	0.2143	1	0.0714
SCG3	Proneural	12	0	0	9	0.75
GAS1	Classical	22	0	0	5	0.2273
TLR4	Mesenchymal	24	8	0.3333	1	0.0417
CSTA	Mesenchymal	12	11	0.9167	0	0
CCDC109B	Mesenchymal	12	12	1	0	0
LTBP2	Mesenchymal	16	5	0.3125	0	0
HOXD3	Proneural	30	4	0.1333	2	0.0667
SCN3A	Proneural	15	1	0.0667	4	0.2667
DCX	Proneural	22	0	0	2	0.0909
GPR17	Proneural	22	0	0	4	0.1818
RAP2A	Proneural	31	0	0	12	0.3871
ZNF228	Classical	1	0	0	0	0
SYNGR2	Mesenchymal	12	5	0.4167	0	0
TTYH1	Proneural	12	0	0	8	0.6667
LCP2	Mesenchymal	34	15	0.4412	0	0
HFE	Mesenchymal	128	35	0.2734	0	0
SERPINE1	Mesenchymal	27	16	0.5926	0	0
CASP5	Mesenchymal	12	4	0.3333	1	0.0833
FAM125B	Proneural	36	0	0	14	0.3889
SEZ6L	Proneural	49	0	0	46	0.9388
FLJ22662	Mesenchymal	9	5	0.5556	0	0
RALGPS1	Proneural	33	0	0	15	0.4545
THTPA	Neural	15	0	0	7	0.4667
SOCS2	Classical	22	3	0.1364	0	0
ILK	Classical	12	6	0.5	0	0
CD151	Classical	13	5	0.3846	0	0
ZNF20	Classical	9	2	0.2222	0	0
ICAM3	Mesenchymal	13	11	0.8462	0	0
FES	Mesenchymal	12	3	0.25	0	0
IL4R	Mesenchymal	17	4	0.2353	0	0
SOX9	Classical	21	0	0	0	0
GLI2	Classical	26	4	0.1538	1	0.0385
CDK6	Classical	43	4	0.093	1	0.0233
PAFAH1B3	Proneural	13	0	0	2	0.1538
ZFHX4	Classical	19	0	0	5	0.2632
RGS12	Classical	74	0	0	28	0.3784
CTSB	Mesenchymal	44	26	0.5909	1	0.0227
JUND	Classical	32	0	0	5	0.1562
MORF4L2	Neural	20	8	0.4	1	0.05
NDRG2	Neural	32	0	0	23	0.7188
FZD7	Classical	22	14	0.6364	0	0
PRPSAP2	Neural	12	0	0	2	0.1667
ANKS1B	Neural	27	0	0	4	0.1481
CAMK2B	Classical	49	0	0	23	0.4694
TGFBR2	Mesenchymal	23	8	0.3478	0	0
TTC3	Proneural	62	0	0	24	0.3871
RGS6	Classical	34	0	0	10	0.2941
SRGAP3	Proneural	29	0	0	17	0.5862
LOX	Mesenchymal	26	22	0.8462	0	0
KLRK1	Proneural	16	0	0	8	0.5
SYPL1	Mesenchymal	22	15	0.6818	0	0
NCALD	Proneural	17	0	0	3	0.1765
FURIN	Mesenchymal	12	0	0	1	0.0833
RELB	Mesenchymal	12	5	0.4167	0	0
MEIS1	Classical	20	0	0	1	0.05
AIM1	Mesenchymal	14	11	0.7857	0	0
WWTR1	Mesenchymal	31	15	0.4839	0	0
LAMB2	Classical	13	6	0.4615	0	0
SLC2A10	Classical	11	10	0.9091	0	0
MGC2752	Classical	19	2	0.1053	1	0.0526
ANKRD46	Neural	16	1	0.0625	4	0.25
MTSS1	Proneural	39	0	0	16	0.4103
MARCKSL1	Proneural	12	0	0	9	0.75
YPEL5	Neural	15	3	0.2	0	0
BLM	Classical	13	3	0.2308	0	0
ZNF419	Classical	20	2	0.1	2	0.1
SH3GL3	Neural	30	0	0	7	0.2333
MMD	Neural	16	2	0.125	0	0
MYO1F	Mesenchymal	13	6	0.4615	0	0
FHL2	Mesenchymal	12	2	0.1667	0	0
IMPA1	Neural	13	5	0.3846	0	0
SOX10	Proneural	22	0	0	5	0.2273
BTBD2	Classical	13	0	0	7	0.5385
LMO2	Classical	13	2	0.1538	1	0.0769
BEST1	Neural	21	1	0.0476	4	0.1905
LAPTM5	Mesenchymal	22	12	0.5455	0	0
AGXT2L1	Neural	12	2	0.1667	6	0.5
MBP	Neural	51	2	0.0392	5	0.098
GLT25D1	Mesenchymal	15	7	0.4667	0	0
PHLPP	Proneural	9	0	0	3	0.3333
GABRB2	Neural	20	0	0	4	0.2
LCP1	Mesenchymal	13	7	0.5385	0	0
DSE	Mesenchymal	20	10	0.5	1	0.05
FHIT	Neural	13	3	0.2308	2	0.1538
OSBPL3	Classical	22	3	0.1364	0	0
DPYSL4	Proneural	31	2	0.0645	10	0.3226
FLJ21963	Classical	1	0	0	0	0
ZNF323	Neural	11	3	0.2727	0	0
GUK1	Neural	22	5	0.2273	0	0
ZNF264	Classical	20	0	0	0	0
CUTC	Neural	11	0	0	4	0.3636
RAB33A	Proneural	13	0	0	4	0.3077
TNFRSF1A	Mesenchymal	13	9	0.6923	0	0
KYNU	Mesenchymal	47	15	0.3191	0	0
CASP1	Mesenchymal	53	33	0.6226	0	0
WDR68	Proneural	23	1	0.0435	2	0.087
SLC6A9	Classical	12	0	0	3	0.25
CD2AP	Mesenchymal	16	9	0.5625	1	0.0625
CCR5	Mesenchymal	12	6	0.5	0	0
TMEFF1	Proneural	22	0	0	3	0.1364
SLAMF8	Mesenchymal	21	15	0.7143	0	0
POFUT1	Classical	21	4	0.1905	0	0
RABGAP1L	Mesenchymal	40	5	0.125	13	0.325
M6PRBP1	Classical	6	1	0.1667	0	0
DLC1	Classical	38	0	0	4	0.1053
CRYL1	Neural	12	0	0	6	0.5
CXXC4	Proneural	15	0	0	10	0.6667
PPP1R1A	Neural	16	0	0	9	0.5625
PCSK5	Classical	31	7	0.2258	0	0
FZD3	Classical	12	2	0.1667	0	0
SEPW1	Neural	16	2	0.125	1	0.0625
SSH3	Classical	29	3	0.1034	0	0
NES	Classical	16	3	0.1875	1	0.0625
CDCP1	Mesenchymal	20	9	0.45	0	0
RAB27A	Mesenchymal	37	34	0.9189	0	0
CBX1	Proneural	12	0	0	0	0
PEX19	Neural	21	5	0.2381	3	0.1429
NSL1	Neural	29	3	0.1034	2	0.069
FBXO17	Classical	2	2	1	0	0
LRP5	Classical	16	0	0	7	0.4375
YAP1	Mesenchymal	20	11	0.55	0	0
FXYD1	Neural	13	1	0.0769	3	0.2308
CCDC121	Neural	11	4	0.3636	0	0
EHD2	Mesenchymal	30	5	0.1667	3	0.1
RAD21	Proneural	21	0	0	4	0.1905
BCL7A	Proneural	21	0	0	20	0.9524
MEGF8	Classical	16	1	0.0625	3	0.1875
FNDC3B	Mesenchymal	40	31	0.775	1	0.025
MCM10	Proneural	19	1	0.0526	1	0.0526
RUFY3	Proneural	57	13	0.2281	22	0.386
GNA15	Mesenchymal	12	4	0.3333	0	0
GNG4	Proneural	25	0	0	7	0.28
SIPA1L1	Classical	22	2	0.0909	2	0.0909
POMT2	Classical	15	0	0	6	0.4
PAK3	Proneural	15	0	0	4	0.2667
SNTA1	Classical	12	1	0.0833	3	0.25
ELF4	Mesenchymal	21	14	0.6667	0	0
ATRNL1	Neural	25	2	0.08	8	0.32
ZNF671	Classical	11	0	0	5	0.4545
REPS2	Neural	20	0	0	7	0.35
SOX11	Proneural	30	0	0	4	0.1333
MRC2	Mesenchymal	21	9	0.4286	0	0
TGIF2	Classical	21	2	0.0952	0	0
ZNF217	Mesenchymal	13	8	0.6154	0	0
CLIP2	Classical	12	0	0	7	0.5833
CDC42	Neural	46	13	0.2826	4	0.087
AOF2	Proneural	8	0	0	0	0
HEXB	Mesenchymal	13	12	0.9231	0	0
C19orf22	Classical	20	0	0	4	0.2
CD97	Classical	13	4	0.3077	0	0
VPS16	Classical	15	0	0	4	0.2667
PSCDBP	Mesenchymal	1	0	0	0	0
ORC4L	Neural	21	9	0.4286	1	0.0476
WIPF1	Mesenchymal	34	8	0.2353	1	0.0294
SEPT11	Classical	38	2	0.0526	9	0.2368
SLCO5A1	Proneural	11	0	0	1	0.0909
DMWD	Classical	26	0	0	11	0.4231
MSR1	Mesenchymal	40	18	0.45	0	0
TRPM2	Mesenchymal	13	0	0	2	0.1538
TSNAX	Neural	12	6	0.5	0	0
APBA3	Classical	21	1	0.0476	1	0.0476
RRAS	Mesenchymal	14	10	0.7143	0	0
STMN4	Proneural	13	0	0	5	0.3846
HPCAL4	Neural	21	2	0.0952	6	0.2857
KCNK1	Neural	22	0	0	4	0.1818
SLCO1A2	Neural	30	0	0	16	0.5333
ARRB1	Neural	19	0	0	7	0.3684
TOP2B	Proneural	14	0	0	2	0.1429
SH3GL2	Neural	12	0	0	5	0.4167
SHOX2	Classical	30	13	0.4333	0	0
ITGA7	Classical	22	6	0.2727	0	0
CDH6	Classical	43	2	0.0465	3	0.0698
FBXO3	Neural	32	3	0.0938	1	0.0312
RNFT2	Proneural	26	0	0	10	0.3846
FER1L3	Mesenchymal	1	1	1	0	0
SFT2D2	Mesenchymal	12	7	0.5833	0	0
COL5A1	Mesenchymal	29	15	0.5172	0	0
IRS2	Classical	21	1	0.0476	4	0.1905
DENND2A	Classical	30	5	0.1667	0	0
ZNF134	Classical	12	1	0.0833	1	0.0833
MAN2A1	Mesenchymal	20	5	0.25	0	0
PTPN14	Classical	12	0	0	0	0
NOD2	Mesenchymal	11	6	0.5455	0	0
IL15RA	Mesenchymal	13	3	0.2308	0	0
KLHL4	Classical	17	2	0.1176	0	0
CTSZ	Mesenchymal	23	6	0.2609	2	0.087
GRM1	Neural	32	1	0.0312	7	0.2188
SEC61A2	Proneural	19	0	0	11	0.5789
TMSL8	Proneural	1	0	0	0	0
ALDH3B1	Mesenchymal	25	3	0.12	3	0.12
MAT2B	Neural	12	3	0.25	0	0
KIF21B	Proneural	12	0	0	8	0.6667
COL8A2	Mesenchymal	20	9	0.45	0	0
YPEL1	Proneural	20	0	0	9	0.45
ITGB8	Classical	30	5	0.1667	0	0
MYST2	Proneural	12	0	0	7	0.5833
KLRC4	Proneural	13	0	0	4	0.3077
PCDH11X	Proneural	17	0	0	3	0.1765
ITGB2	Mesenchymal	21	12	0.5714	0	0
CCK	Neural	12	0	0	4	0.3333
ASCL1	Proneural	51	0	0	32	0.6275
KIAA1598	Neural	12	1	0.0833	1	0.0833
ANXA7	Neural	21	3	0.1429	4	0.1905
FOLR2	Mesenchymal	17	1	0.0588	1	0.0588
TTPA	Neural	12	2	0.1667	0	0
MLLT11	Proneural	13	0	0	1	0.0769
NKX2-2	Proneural	14	0	0	6	0.4286
EPB41L3	Neural	31	2	0.0645	1	0.0323
PMP22	Classical	13	3	0.2308	0	0
SIGLEC7	Mesenchymal	31	9	0.2903	0	0
TLR2	Mesenchymal	13	8	0.6154	0	0
ZNF804A	Proneural	12	1	0.0833	5	0.4167
ACPP	Mesenchymal	17	5	0.2941	0	0
HN1	Proneural	16	0	0	0	0
STAT6	Mesenchymal	22	4	0.1818	0	0
P2RX7	Proneural	12	0	0	6	0.5
ENPP2	Neural	24	1	0.0417	2	0.0833
CHN1	Neural	13	4	0.3077	1	0.0769
DRAM	Mesenchymal	10	5	0.5	0	0
PPM1E	Proneural	16	1	0.0625	2	0.125
SLC31A2	Neural	12	3	0.25	1	0.0833
CASP4	Mesenchymal	23	15	0.6522	0	0
ZNF643	Proneural	12	0	0	3	0.25
TMED1	Classical	12	4	0.3333	0	0
CEBPB	Mesenchymal	12	5	0.4167	0	0
PPA1	Neural	12	0	0	3	0.25
SGK3	Neural	13	1	0.0769	1	0.0769
POPDC3	Neural	12	1	0.0833	0	0
BNC2	Mesenchymal	31	12	0.3871	0	0
NDUFS3	Neural	12	1	0.0833	2	0.1667
ANXA4	Mesenchymal	22	19	0.8636	0	0
TES	Mesenchymal	26	10	0.3846	0	0
NANOS1	Neural	9	2	0.2222	0	0
NRXN1	Proneural	43	0	0	19	0.4419
BCOR	Proneural	23	3	0.1304	4	0.1739
SAR1A	Neural	31	6	0.1935	2	0.0645
UAP1	Mesenchymal	13	12	0.9231	0	0
PELI1	Proneural	19	0	0	0	0
ATAD5	Proneural	11	0	0	1	0.0909
B3GALT1	Classical	16	0	0	4	0.25
CYBRD1	Mesenchymal	16	11	0.6875	0	0
ARAP3	Classical	15	3	0.2	0	0
KEAP1	Classical	12	0	0	1	0.0833
NLGN3	Proneural	16	0	0	9	0.5625
FAM110B	Proneural	20	0	0	10	0.5
CAST	Mesenchymal	37	30	0.8108	0	0
PLS3	Mesenchymal	14	10	0.7143	0	0
DAG1	Classical	21	2	0.0952	1	0.0476
TGFBI	Mesenchymal	13	11	0.8462	0	0
TIMP1	Mesenchymal	13	11	0.8462	0	0
UGT8	Neural	17	0	0	6	0.3529
GABARAPL2	Neural	12	1	0.0833	3	0.25
CALM1	Classical	65	0	0	28	0.4308
MFSD1	Mesenchymal	15	11	0.7333	0	0
UROS	Neural	17	1	0.0588	4	0.2353
HEXA	Mesenchymal	27	6	0.2222	4	0.1481
LRP10	Classical	16	4	0.25	0	0
KLHL25	Classical	12	0	0	7	0.5833
PLAUR	Mesenchymal	32	21	0.6562	0	0
CDH4	Classical	29	1	0.0345	7	0.2414
RND1	Neural	12	0	0	6	0.5
NDP	Classical	13	2	0.1538	0	0
IL1RAPL1	Proneural	15	0	0	9	0.6
SLC4A4	Classical	45	1	0.0222	8	0.1778
SNX26	Proneural	14	0	0	7	0.5
OLIG2	Proneural	23	0	0	17	0.7391
GABRA3	Proneural	12	0	0	2	0.1667
CLCF1	Mesenchymal	11	3	0.2727	0	0
E2F3	Proneural	21	2	0.0952	2	0.0952
CASK	Proneural	36	2	0.0556	3	0.0833
CALM2	Neural	5	2	0.4	0	0
SLC11A1	Mesenchymal	50	21	0.42	3	0.06
LFNG	Classical	16	0	0	5	0.3125
GSK3B	Proneural	16	0	0	4	0.25
COL1A2	Mesenchymal	29	22	0.7586	0	0
GCNT1	Mesenchymal	16	11	0.6875	0	0
AMOTL2	Proneural	12	0	0	9	0.75
ZNF184	Proneural	13	0	0	1	0.0769
TNFAIP3	Mesenchymal	22	15	0.6818	0	0
LY96	Mesenchymal	13	11	0.8462	0	0
ARNTL	Classical	22	1	0.0455	0	0
CRB1	Proneural	16	0	0	5	0.3125
VAV3	Classical	25	1	0.04	4	0.16
IL1R1	Mesenchymal	22	7	0.3182	0	0
CLIC1	Mesenchymal	13	11	0.8462	0	0
GPM6A	Proneural	25	0	0	10	0.4
PROCR	Mesenchymal	13	12	0.9231	0	0
MAB21L1	Classical	13	2	0.1538	0	0
PHF11	Mesenchymal	15	9	0.6	0	0
NPAS3	Classical	33	0	0	12	0.3636
TRIB2	Classical	23	0	0	5	0.2174
RFXANK	Classical	12	3	0.25	0	0
AMPD3	Mesenchymal	21	4	0.1905	1	0.0476
HRASLS	Proneural	21	3	0.1429	0	0
TTC1	Neural	12	5	0.4167	0	0
TMEM147	Classical	12	1	0.0833	0	0
PIPOX	Classical	11	3	0.2727	0	0
EPHB4	Classical	21	1	0.0476	1	0.0476
S100A11	Mesenchymal	22	18	0.8182	0	0
CLASP2	Proneural	46	0	0	33	0.7174
LRRFIP1	Mesenchymal	67	25	0.3731	2	0.0299
ARSJ	Mesenchymal	12	4	0.3333	0	0
ZNF235	Classical	20	0	0	3	0.15
CAMK2G	Neural	33	1	0.0303	25	0.7576
ACSL4	Neural	12	5	0.4167	0	0
GALNT4	Classical	9	3	0.3333	0	0
SATB1	Proneural	13	0	0	9	0.6923
POLD4	Mesenchymal	12	3	0.25	0	0
SLC10A3	Mesenchymal	12	10	0.8333	0	0
EPHB1	Proneural	26	1	0.0385	3	0.1154
PPM1D	Proneural	12	1	0.0833	0	0
ANXA5	Classical	12	8	0.6667	0	0
RERGL	Neural	11	0	0	4	0.3636
LOC55565	Proneural	2	0	0	1	0.5
SOX2	Proneural	36	1	0.0278	5	0.1389
S100A13	Mesenchymal	17	7	0.4118	0	0
BATF	Mesenchymal	12	5	0.4167	0	0
PEPD	Classical	12	1	0.0833	0	0
BLVRB	Mesenchymal	13	7	0.5385	0	0
PEX11B	Neural	12	1	0.0833	1	0.0833
STMN1	Proneural	23	0	0	3	0.1304
LOC81691	Proneural	21	1	0.0476	1	0.0476
CDC7	Proneural	13	4	0.3077	0	0
GRIA2	Proneural	21	0	0	17	0.8095
LPHN3	Proneural	30	0	0	21	0.7
REEP1	Proneural	22	0	0	4	0.1818
TCEAL1	Neural	12	4	0.3333	1	0.0833
DPP6	Proneural	21	0	0	11	0.5238
SAT1	Mesenchymal	36	26	0.7222	0	0
SEMA6A	Classical	35	0	0	11	0.3143
PTGER4	Mesenchymal	17	9	0.5294	0	0
TRADD	Mesenchymal	31	10	0.3226	0	0
FAM49B	Neural	29	2	0.069	3	0.1034
MAST1	Proneural	13	0	0	12	0.9231
MVP	Mesenchymal	13	6	0.4615	0	0
RBMS1	Mesenchymal	48	29	0.6042	0	0
SPAST	Neural	21	1	0.0476	3	0.1429
NRXN2	Proneural	21	0	0	17	0.8095
FHOD3	Proneural	11	0	0	0	0
ERCC2	Classical	15	0	0	5	0.3333
C6orf134	Proneural	15	1	0.0667	8	0.5333
CD3EAP	Classical	11	1	0.0909	2	0.1818
FLRT1	Proneural	12	0	0	9	0.75
PARP8	Neural	12	6	0.5	0	0
DHRS9	Neural	19	0	0	10	0.5263
UCP2	Mesenchymal	22	10	0.4545	0	0
EYA2	Classical	13	1	0.0769	2	0.1538
ICK	Proneural	16	0	0	5	0.3125
CREB5	Classical	17	1	0.0588	0	0
RFX2	Classical	16	2	0.125	1	0.0625
EDG1	Neural	1	1	1	0	0
CYTH4	Mesenchymal	24	2	0.0833	1	0.0417
ZNF304	Classical	11	0	0	1	0.0909
DOCK6	Classical	47	0	0	10	0.2128
FMNL1	Mesenchymal	16	2	0.125	0	0
PTPRC	Mesenchymal	41	17	0.4146	0	0
MYB	Proneural	28	4	0.1429	2	0.0714
CDC25A	Proneural	26	5	0.1923	1	0.0385
CD14	Mesenchymal	13	8	0.6154	0	0
CTSC	Mesenchymal	25	20	0.8	0	0
RBKS	Mesenchymal	21	11	0.5238	0	0
ITGA4	Mesenchymal	31	21	0.6774	0	0
RIN1	Classical	14	0	0	2	0.1429

## Sheet: S2 Phillips_Gene_Cor
Dataset S2: Probes for Philips signature genes correlated with IL13Rα2.
Gene	Subtype	Number of Comparisons	Number of positive correlations	Percent positive correlations	Number of negative correlations	Percent negative correlations
TAGLN	Mesenchymal	21	6	0.2857	0	0
IQGAP3	Proliferative	18	1	0.0556	1	0.0556
PDPN	Mesenchymal	37	21	0.5676	0	0
DLL3	Proneural	24	0	0	14	0.5833
COL4A2	Mesenchymal	22	11	0.5	0	0
FOSL2	Mesenchymal	38	19	0.5	0	0
CSDC2	Proneural	12	0	0	5	0.4167
ANGPTL4	Mesenchymal	16	5	0.3125	0	0
PLA2G5	Mesenchymal	31	5	0.1613	1	0.0323
GALNT13	Proneural	14	0	0	4	0.2857
PDLIM4	Mesenchymal	49	14	0.2857	1	0.0204
C20orf42	Proneural	1	0	0	0	0
KLRC3	Proneural	12	0	0	4	0.3333
SOX8	Proneural	6	0	0	2	0.3333
LIF	Mesenchymal	13	4	0.3077	0	0
NCAM1	Proneural	57	0	0	23	0.4035
CHI3L1	Mesenchymal	31	19	0.6129	0	0
RASL10A	Proneural	12	0	0	8	0.6667
SCG3	Proneural	12	0	0	7	0.5833
GABBR1	Proneural	19	0	0	10	0.5263
SERPINE1	Mesenchymal	27	14	0.5185	0	0
COL4A1	Mesenchymal	22	12	0.5455	0	0
DTL	Proliferative	16	6	0.375	0	0
ATP6V1G2	Proneural	13	0	0	8	0.6154
NDRG2	Proneural	32	0	0	20	0.625
MYL9	Mesenchymal	12	6	0.5	0	0
HMMR	Proliferative	22	14	0.6364	0	0
CENPK	Proliferative	6	2	0.3333	0	0
FAM20C	Mesenchymal	6	3	0.5	1	0.1667
TIMP1	Mesenchymal	13	9	0.6923	0	0
E2F7	Proliferative	10	2	0.2	0	0
SRRM2	Proneural	34	0	0	9	0.2647
SNAP91	Proneural	13	0	0	5	0.3846
SPOCD1	Mesenchymal	10	6	0.6	0	0

## Sheet: S3 TCGA_Signature Genes
Dataset S3: Gene Signature Probes used for TCGA Subtypes
Probe ID	Gene Symbol	Subtype
206465_at	ACSBG1	Classical
201661_s_at	ACSL3	Classical
201662_s_at	ACSL3	Classical
209765_at	ADAM19	Classical
205733_at	BLM	Classical
209956_s_at	CAMK2B	Classical
210404_x_at	CAMK2B	Classical
206866_at	CDH4	Classical
220227_at	CDH4	Classical
205344_at	CSPG5	Classical
221885_at	DENND2A	Classical
221886_at	DENND2A	Classical
53991_at	DENND2A	Classical
210762_s_at	DLC1	Classical
201984_s_at	EGFR	Classical
210984_x_at	EGFR	Classical
211607_x_at	EGFR	Classical
213712_at	ELOVL2	Classical
220029_at	ELOVL2	Classical
209692_at	EYA2	Classical
204457_s_at	GAS1	Classical
209184_s_at	IRS2	Classical
209663_s_at	ITGA7	Classical
211488_s_at	ITGB8	Classical
210263_at	KCNF1	Classical
219331_s_at	KLHDC8A	Classical
214591_at	KLHL4	Classical
204249_s_at	LMO2	Classical
204069_at	MEIS1	Classical
213395_at	MLC1	Classical
218966_at	MYO5C	Classical
220316_at	NPAS3	Classical
207443_at	NR2E1	Classical
205463_s_at	PDGFA	Classical
216867_s_at	PDGFA	Classical
210270_at	RGS6	Classical
215028_at	SEMA6A	Classical
208443_x_at	SHOX2	Classical
210135_s_at	SHOX2	Classical
202254_at	SIPA1L1	Classical
203908_at	SLC4A4	Classical
210739_x_at	SLC4A4	Classical
211494_s_at	SLC4A4	Classical
203372_s_at	SOCS2	Classical
203373_at	SOCS2	Classical
204011_at	SPRY2	Classical
40837_at	TLE2	Classical
202478_at	TRIB2	Classical
202479_s_at	TRIB2	Classical
218806_s_at	VAV3	Classical
218807_at	VAV3	Classical
213155_at	WSCD1	Classical
219779_at	ZFHX4	Classical
201963_at	ACSL1	Mesenchymal
207275_s_at	ACSL1	Mesenchymal
202952_s_at	ADAM12	Mesenchymal
213790_at	ADAM12	Mesenchymal
212543_at	AIM1	Mesenchymal
205640_at	ALDH3B1	Mesenchymal
204446_s_at	ALOX5	Mesenchymal
207992_s_at	AMPD3	Mesenchymal
201012_at	ANXA1	Mesenchymal
201301_s_at	ANXA4	Mesenchymal
203910_at	ARHGAP29	Mesenchymal
201954_at	ARPC1B	Mesenchymal
219973_at	ARSJ	Mesenchymal
220272_at	BNC2	Mesenchymal
207571_x_at	C1orf38	Mesenchymal
210785_s_at	C1orf38	Mesenchymal
220088_at	C5AR1	Mesenchymal
206011_at	CASP1	Mesenchymal
209970_x_at	CASP1	Mesenchymal
211366_x_at	CASP1	Mesenchymal
211367_s_at	CASP1	Mesenchymal
211368_s_at	CASP1	Mesenchymal
209310_s_at	CASP4	Mesenchymal
207467_x_at	CAST	Mesenchymal
208908_s_at	CAST	Mesenchymal
201743_at	CD14	Mesenchymal
203547_at	CD4	Mesenchymal
212501_at	CEBPB	Mesenchymal
209395_at	CHI3L1	Mesenchymal
209396_s_at	CHI3L1	Mesenchymal
216546_s_at	CHI3L1	Mesenchymal
209732_at	CLEC2B	Mesenchymal
201605_x_at	CNN2	Mesenchymal
202310_s_at	COL1A1	Mesenchymal
202311_s_at	COL1A1	Mesenchymal
202403_s_at	COL1A2	Mesenchymal
202404_s_at	COL1A2	Mesenchymal
203325_s_at	COL5A1	Mesenchymal
212488_at	COL5A1	Mesenchymal
212489_at	COL5A1	Mesenchymal
221900_at	COL8A2	Mesenchymal
219561_at	COPZ2	Mesenchymal
204971_at	CSTA	Mesenchymal
200838_at	CTSB	Mesenchymal
213274_s_at	CTSB	Mesenchymal
201487_at	CTSC	Mesenchymal
210042_s_at	CTSZ	Mesenchymal
201278_at	DAB2	Mesenchymal
201279_s_at	DAB2	Mesenchymal
201280_s_at	DAB2	Mesenchymal
210757_x_at	DAB2	Mesenchymal
218854_at	DSE	Mesenchymal
31845_at	ELF4	Mesenchymal
209392_at	ENPP2	Mesenchymal
210839_s_at	ENPP2	Mesenchymal
206710_s_at	EPB41L3	Mesenchymal
211776_s_at	EPB41L3	Mesenchymal
203561_at	FCGR2A	Mesenchymal
210889_s_at	FCGR2B	Mesenchymal
202949_s_at	FHL2	Mesenchymal
218618_s_at	FNDC3B	Mesenchymal
204829_s_at	FOLR2	Mesenchymal
218084_x_at	FXYD5	Mesenchymal
203705_s_at	FZD7	Mesenchymal
203706_s_at	FZD7	Mesenchymal
216041_x_at	GRN	Mesenchymal
201422_at	IFI30	Mesenchymal
203851_at	IGFBP6	Mesenchymal
202948_at	IL1R1	Mesenchymal
203233_at	IL4R	Mesenchymal
200791_s_at	IQGAP1	Mesenchymal
213446_s_at	IQGAP1	Mesenchymal
213416_at	ITGA4	Mesenchymal
201389_at	ITGA5	Mesenchymal
205786_s_at	ITGAM	Mesenchymal
202803_s_at	ITGB2	Mesenchymal
217388_s_at	KYNU	Mesenchymal
210644_s_at	LAIR1	Mesenchymal
201505_at	LAMB1	Mesenchymal
211651_s_at	LAMB1	Mesenchymal
201720_s_at	LAPTM5	Mesenchymal
201721_s_at	LAPTM5	Mesenchymal
208885_at	LCP1	Mesenchymal
205269_at	LCP2	Mesenchymal
205270_s_at	LCP2	Mesenchymal
208949_s_at	LGALS3	Mesenchymal
212658_at	LHFPL2	Mesenchymal
204298_s_at	LOX	Mesenchymal
215446_s_at	LOX	Mesenchymal
201862_s_at	LRRFIP1	Mesenchymal
202729_s_at	LTBP1	Mesenchymal
204682_at	LTBP2	Mesenchymal
205668_at	LY75	Mesenchymal
206584_at	LY96	Mesenchymal
218559_s_at	MAFB	Mesenchymal
221760_at	MAN1A1	Mesenchymal
205105_at	MAN2A1	Mesenchymal
219607_s_at	MS4A4A	Mesenchymal
211887_x_at	MSR1	Mesenchymal
214770_at	MSR1	Mesenchymal
202180_s_at	MVP	Mesenchymal
213733_at	MYO1F	Mesenchymal
209949_at	NCF2	Mesenchymal
207677_s_at	NCF4	Mesenchymal
200701_at	NPC2	Mesenchymal
210510_s_at	NRP1	Mesenchymal
212298_at	NRP1	Mesenchymal
209626_s_at	OSBPL3	Mesenchymal
202733_at	P4HA2	Mesenchymal
205559_s_at	PCSK5	Mesenchymal
204879_at	PDPN	Mesenchymal
205479_s_at	PLAU	Mesenchymal
211668_s_at	PLAU	Mesenchymal
210845_s_at	PLAUR	Mesenchymal
211924_s_at	PLAUR	Mesenchymal
214866_at	PLAUR	Mesenchymal
201215_at	PLS3	Mesenchymal
219926_at	POPDC3	Mesenchymal
204897_at	PTGER4	Mesenchymal
206687_s_at	PTPN6	Mesenchymal
207238_s_at	PTPRC	Mesenchymal
212587_s_at	PTPRC	Mesenchymal
212588_at	PTPRC	Mesenchymal
208789_at	PTRF	Mesenchymal
202990_at	PYGL	Mesenchymal
209514_s_at	RAB27A	Mesenchymal
209515_s_at	RAB27A	Mesenchymal
210951_x_at	RAB27A	Mesenchymal
222294_s_at	RAB27A	Mesenchymal
213603_s_at	RAC2	Mesenchymal
209868_s_at	RBMS1	Mesenchymal
212647_at	RRAS	Mesenchymal
200660_at	S100A11	Mesenchymal
208540_x_at	S100A11	Mesenchymal
203186_s_at	S100A4	Mesenchymal
213988_s_at	SAT1	Mesenchymal
202833_s_at	SERPINA1	Mesenchymal
211429_s_at	SERPINA1	Mesenchymal
202627_s_at	SERPINE1	Mesenchymal
202628_s_at	SERPINE1	Mesenchymal
214853_s_at	SHC1	Mesenchymal
207224_s_at	SIGLEC7	Mesenchymal
219385_at	SLAMF8	Mesenchymal
219386_s_at	SLAMF8	Mesenchymal
210423_s_at	SLC11A1	Mesenchymal
202856_s_at	SLC16A3	Mesenchymal
204204_at	SLC31A2	Mesenchymal
210218_s_at	SP100	Mesenchymal
217995_at	SQRDL	Mesenchymal
205499_at	SRPX2	Mesenchymal
204150_at	STAB1	Mesenchymal
38487_at	STAB1	Mesenchymal
201331_s_at	STAT6	Mesenchymal
201079_at	SYNGR2	Mesenchymal
204158_s_at	TCIRG1	Mesenchymal
201506_at	TGFBI	Mesenchymal
208944_at	TGFBR2	Mesenchymal
203887_s_at	THBD	Mesenchymal
203888_at	THBD	Mesenchymal
201108_s_at	THBS1	Mesenchymal
201109_s_at	THBS1	Mesenchymal
201110_s_at	THBS1	Mesenchymal
201666_at	TIMP1	Mesenchymal
204924_at	TLR2	Mesenchymal
202644_s_at	TNFAIP3	Mesenchymal
208296_x_at	TNFAIP8	Mesenchymal
210260_s_at	TNFAIP8	Mesenchymal
203508_at	TNFRSF1B	Mesenchymal
203567_s_at	TRIM38	Mesenchymal
203568_s_at	TRIM38	Mesenchymal
204929_s_at	VAMP5	Mesenchymal
204254_s_at	VDR	Mesenchymal
202134_s_at	WWTR1	Mesenchymal
206833_s_at	ACYP2	Neural
201752_s_at	ADD3	Neural
201753_s_at	ADD3	Neural
205882_x_at	ADD3	Neural
221008_s_at	AGXT2L1	Neural
212731_at	ANKRD46	Neural
212669_at	CAMK2G	Neural
212757_s_at	CAMK2G	Neural
205827_at	CCK	Neural
214230_at	CDC42	Neural
220753_s_at	CRYL1	Neural
205489_at	CRYM	Neural
219799_s_at	DHRS9	Neural
205348_s_at	DYNC1I1	Neural
205384_at	FXYD1	Neural
214157_at	GNAS	Neural
205814_at	GRM3	Neural
205454_at	HPCA	Neural
204678_s_at	KCNK1	Neural
214087_s_at	MYBPC1	Neural
206022_at	NDP	Neural
206453_s_at	NDRG2	Neural
214279_s_at	NDRG2	Neural
206899_at	NTSR2	Neural
205478_at	PPP1R1A	Neural
202598_at	S100A13	Neural
205352_at	SERPINI1	Neural
203516_at	SNTA1	Neural
219750_at	TMEM144	Neural
282	ALCAM	Proneural
201952_at	ALCAM	Proneural
203002_at	AMOTL2	Proneural
209987_s_at	ASCL1	Proneural
209988_s_at	ASCL1	Proneural
213768_s_at	ASCL1	Proneural
218874_s_at	ATAT1	Proneural
213745_at	ATRNL1	Proneural
202391_at	BASP1	Proneural
219107_at	BCAN	Proneural
91920_at	BCAN	Proneural
204378_at	BCAS1	Proneural
203795_s_at	BCL7A	Proneural
203796_s_at	BCL7A	Proneural
218332_at	BEX1	Proneural
219010_at	C1orf106	Proneural
205575_at	C1QL1	Proneural
220889_s_at	CA10	Proneural
204695_at	CDC25A	Proneural
204510_at	CDC7	Proneural
204995_at	CDK5R1	Proneural
218829_s_at	CHD7	Proneural
212306_at	CLASP2	Proneural
212308_at	CLASP2	Proneural
212309_at	CLASP2	Proneural
205830_at	CLGN	Proneural
211203_s_at	CNTN1	Proneural
220522_at	CRB1	Proneural
202517_at	CRMP1	Proneural
220277_at	CXXC4	Proneural
217025_s_at	DBN1	Proneural
204850_s_at	DCX	Proneural
204851_s_at	DCX	Proneural
206806_at	DGKI	Proneural
219537_x_at	DLL3	Proneural
209839_at	DNM3	Proneural
205493_s_at	DPYSL4	Proneural
219144_at	DUSP26	Proneural
210753_s_at	EPHB1	Proneural
211898_s_at	EPHB1	Proneural
202454_s_at	ERBB3	Proneural
52975_at	FAM125B	Proneural
206404_at	FGF9	Proneural
218980_at	FHOD3	Proneural
210414_at	FLRT1	Proneural
217897_at	FXYD6	Proneural
204121_at	GADD45G	Proneural
209576_at	GNAI1	Proneural
205184_at	GNG4	Proneural
206190_at	GPR17	Proneural
215225_s_at	GPR17	Proneural
205358_at	GRIA2	Proneural
202967_at	GSTA4	Proneural
201833_at	HDAC2	Proneural
217755_at	HN1	Proneural
206601_s_at	HOXD3	Proneural
219983_at	HRASLS	Proneural
219984_s_at	HRASLS	Proneural
204411_at	KIF21B	Proneural
207723_s_at	KLRC3	Proneural
205821_at	KLRK1	Proneural
208107_s_at	LOC81691	Proneural
209866_s_at	LPHN3	Proneural
209867_s_at	LPHN3	Proneural
219732_at	LPPR1	Proneural
205606_at	LRP6	Proneural
220345_at	LRRTM4	Proneural
210015_s_at	MAP2	Proneural
203930_s_at	MAPT	Proneural
200644_at	MARCKSL1	Proneural
207323_s_at	MBP	Proneural
209072_at	MBP	Proneural
211071_s_at	MLLT11	Proneural
207012_at	MMP16	Proneural
205413_at	MPPED2	Proneural
203037_s_at	MTSS1	Proneural
210341_at	MYT1	Proneural
209968_s_at	NCAM1	Proneural
212843_at	NCAM1	Proneural
206915_at	NKX2-2	Proneural
206045_s_at	NOL4	Proneural
206645_s_at	NR0B1	Proneural
209914_s_at	NRXN1	Proneural
209982_s_at	NRXN2	Proneural
213825_at	OLIG2	Proneural
203228_at	PAFAH1B3	Proneural
214607_at	PAK3	Proneural
210721_s_at	PAK7	Proneural
213990_s_at	PAK7	Proneural
205501_at	PDE10A	Proneural
204866_at	PHF16	Proneural
203896_s_at	PLCB4	Proneural
206039_at	RAB33A	Proneural
204199_at	RALGPS1	Proneural
221830_at	RAP2A	Proneural
204364_s_at	REEP1	Proneural
204365_s_at	REEP1	Proneural
203724_s_at	RUFY3	Proneural
213939_s_at	RUFY3	Proneural
203408_s_at	SATB1	Proneural
219196_at	SCG3	Proneural
210432_s_at	SCN3A	Proneural
213609_s_at	SEZ6L	Proneural
213664_at	SLC1A1	Proneural
209842_at	SOX10	Proneural
204913_s_at	SOX11	Proneural
204914_s_at	SOX11	Proneural
204915_s_at	SOX11	Proneural
201416_at	SOX4	Proneural
201417_at	SOX4	Proneural
201418_s_at	SOX4	Proneural
213668_s_at	SOX4	Proneural
200783_s_at	STMN1	Proneural
221236_s_at	STMN4	Proneural
211276_at	TCEAL2	Proneural
213351_s_at	TMCC1	Proneural
213352_at	TMCC1	Proneural
205122_at	TMEFF1	Proneural
205123_s_at	TMEFF1	Proneural
219685_at	TMEM35	Proneural
214774_x_at	TOX3	Proneural
215108_x_at	TOX3	Proneural
216623_x_at	TOX3	Proneural
208358_s_at	UGT8	Proneural
220443_s_at	VAX2	Proneural
204165_at	WASF1	Proneural
203603_s_at	ZEB2	Proneural
207781_s_at	ZNF711	Proneural
215767_at	ZNF804A	Proneural

## Sheet: S4_Phillips_Signature_genes
Dataset S4: Gene Signature Probes used for Phillips Subtypes
Phillips Symbol	Official Symbol	Subtype	Array	Probe
ANGPTL4	ANGPTL4	Mesenchymal	HGU133B	223333_s_at
CHI3L1	CHI3L1	Mesenchymal	HGU133A	209396_s_at
COL4A1	COL4A1	Mesenchymal	HGU133A	211981_at
COL4A2	COL4A2	Mesenchymal	HGU133A	211966_at
FAM20C	FAM20C	Mesenchymal	HGU133B	229438_at
FLJ25348	SPOCD1	Mesenchymal	HGU133B	235417_at
FOSL2	FOSL2	Mesenchymal	HGU133A	218880_at
LIF	LIF	Mesenchymal	HGU133A	205266_at
MYL9	MYL9	Mesenchymal	HGU133A	201058_s_at
PLA2G5	PLA2G5	Mesenchymal	HGU133A	215870_s_at
RIL	PDLIM4	Mesenchymal	HGU133A	211564_s_at
SERPINE1	SERPINE1	Mesenchymal	HGU133A	202628_s_at
T1A-2	PDPN	Mesenchymal	HGU133B	226658_at
TAGLN	TAGLN	Mesenchymal	HGU133A	205547_s_at
TIMP1	TIMP1	Mesenchymal	HGU133A	201666_at
E2F7	E2F7	Proliferative	HGU133B	228033_at
FKSG14	CENPK	Proliferative	HGU133B	222848_at
HMMR	HMMR	Proliferative	HGU133A	207165_at
IQGAP3	IQGAP3	Proliferative	HGU133B	229490_s_at
RAMP	DTL	Proliferative	HGU133A	218585_s_at
ATP6V1G2	ATP6V1G2	Proneural	HGU133A	214762_at
C20orf42	C20orf42	Proneural	HGU133A	218796_at
dA201G10.1	NA	Proneural	HGU133B	232833_at
DLL3	DLL3	Proneural	HGU133A	219537_x_at
GABBR1	GABBR1	Proneural	HGU133A	203146_s_at
GALNT13	GALNT13	Proneural	HGU133B	243779_at
KLRC3	KLRC3	Proneural	HGU133A	207723_s_at
NCAM1	NCAM1	Proneural	HGU133B	229799_s_at
NDRG2	NDRG2	Proneural	HGU133A	214279_s_at
PIPPIN	CSDC2	Proneural	HGU133A	209981_at
RRP22	RASL10A	Proneural	HGU133A	206850_at
SCG3	SCG3	Proneural	HGU133A	219196_at
SNAP91	SNAP91	Proneural	HGU133A	204953_at
SOX8	SOX8	Proneural	HGU133B	226913_s_at
SRRM2	SRRM2	Proneural	HGU133B	227984_at

## Sheet: S5 Patient_Cor_Stat
Dataset S5: Number of Significant Correlations per Gene in Eight Study Cohorts
Symbol	Average Corrrelation (FDR < 0.05)	Number of Datasets Showing Correlation	Entrez Gene Name	Location	Type(s)	TCGA Subtype	Phillips Subtype
IL13RA2	1	8	interleukin 13 receptor, alpha 2	Plasma Membrane	transmembrane receptor	NA	NA
SLC25A24	0.459	8	solute carrier family 25 (mitochondrial carrier; phosphate carrier), member 24	Cytoplasm	other	NA	NA
TAGLN2	0.453	8	transgelin 2	Cytoplasm	other	NA	NA
FSTL1	0.447	8	follistatin-like 1	Extracellular Space	other	NA	NA
GLA	0.444	8	galactosidase, alpha	Cytoplasm	enzyme	NA	NA
HEXB	0.429	8	hexosaminidase B (beta polypeptide)	Cytoplasm	enzyme	Mesenchymal	NA
SLC43A3	0.428	8	solute carrier family 43, member 3	Extracellular Space	other	NA	NA
IFT57	0.427	8	intraflagellar transport 57 homolog (Chlamydomonas)	Cytoplasm	other	NA	NA
FAM114A1	0.426	8	family with sequence similarity 114, member A1	Extracellular Space	other	NA	NA
TNFAIP8	0.423	8	tumor necrosis factor, alpha-induced protein 8	Cytoplasm	other	Mesenchymal	NA
MSN	0.421	8	moesin	Plasma Membrane	other	NA	NA
LGALS1	0.419	8	lectin, galactoside-binding, soluble, 1	Extracellular Space	other	Mesenchymal	NA
CLIC1	0.416	8	chloride intracellular channel 1	Nucleus	ion channel	Mesenchymal	NA
SEC24D	0.411	8	SEC24 family, member D (S. cerevisiae)	Cytoplasm	transporter	Mesenchymal	NA
ANXA1	0.4	8	annexin A1	Plasma Membrane	other	Mesenchymal	NA
DPYD	0.396	8	dihydropyrimidine dehydrogenase	Cytoplasm	enzyme	NA	NA
PDLIM1	0.389	8	PDZ and LIM domain 1	Cytoplasm	transcription regulator	NA	NA
SH3GLB1	0.387	8	SH3-domain GRB2-like endophilin B1	Cytoplasm	enzyme	NA	NA
SLC35A2	0.386	8	solute carrier family 35 (UDP-galactose transporter), member A2	Cytoplasm	transporter	NA	NA
TGFBI	0.383	8	transforming growth factor, beta-induced, 68kDa	Extracellular Space	other	Mesenchymal	NA
GLIPR1	0.382	8	GLI pathogenesis-related 1	Extracellular Space	other	NA	NA
DNAJC10	0.38	8	DnaJ (Hsp40) homolog, subfamily C, member 10	Cytoplasm	enzyme	NA	NA
RER1	0.379	8	RER1 retention in endoplasmic reticulum 1 homolog (S. cerevisiae)	Cytoplasm	other	NA	NA
C5orf15	0.379	8	chromosome 5 open reading frame 15	unknown	other	NA	NA
CD47	0.373	8	CD47 molecule	Plasma Membrane	other	NA	NA
STEAP3	0.371	8	STEAP family member 3, metalloreductase	Cytoplasm	transporter	NA	NA
EFEMP2	0.37	8	EGF containing fibulin-like extracellular matrix protein 2	Extracellular Space	other	Mesenchymal	NA
CALU	0.363	8	calumenin	Cytoplasm	other	NA	NA
CMTM6	0.358	8	CKLF-like MARVEL transmembrane domain containing 6	Extracellular Space	cytokine	NA	NA
IL10RB	0.352	8	interleukin 10 receptor, beta	Plasma Membrane	transmembrane receptor	NA	NA
TGFB2	0.352	8	transforming growth factor, beta 2	Extracellular Space	growth factor	NA	NA
RAB27A	0.351	8	RAB27A, member RAS oncogene family	Cytoplasm	enzyme	Mesenchymal	NA
SLC33A1	0.348	8	solute carrier family 33 (acetyl-CoA transporter), member 1	Cytoplasm	transporter	NA	NA
CP	0.341	8	ceruloplasmin (ferroxidase)	Extracellular Space	enzyme	NA	NA
GNS	0.338	8	glucosamine (N-acetyl)-6-sulfatase	Cytoplasm	enzyme	NA	NA
PDIA6	0.333	8	protein disulfide isomerase family A, member 6	Cytoplasm	enzyme	NA	NA
NTAN1	0.331	8	N-terminal asparagine amidase	Nucleus	enzyme	NA	NA
EIF4E2	0.325	8	eukaryotic translation initiation factor 4E family member 2	Cytoplasm	translation regulator	NA	NA
BTN2A2	0.31	8	butyrophilin, subfamily 2, member A2	unknown	other	NA	NA
FZD1	0.299	8	frizzled family receptor 1	Plasma Membrane	G-protein coupled receptor	NA	NA
MFAP3	0.289	8	microfibrillar-associated protein 3	Extracellular Space	other	NA	NA
L3MBTL1	-0.244	8	l(3)mbt-like 1 (Drosophila)	Nucleus	other	NA	NA
RPL13	-0.305	8	ribosomal protein L13	Cytoplasm	other	NA	NA
PRKCA	-0.327	8	protein kinase C, alpha	Cytoplasm	kinase	NA	NA
CDH10	-0.332	8	cadherin 10, type 2 (T2-cadherin)	Plasma Membrane	other	NA	NA
ITPK1	-0.345	8	inositol-tetrakisphosphate 1-kinase	Cytoplasm	kinase	NA	NA
KCNB1	-0.349	8	potassium voltage-gated channel, Shab-related subfamily, member 1	Plasma Membrane	ion channel	NA	NA
MAPT	-0.35	8	microtubule-associated protein tau	Plasma Membrane	other	Proneural	NA
NTRK3	-0.354	8	neurotrophic tyrosine kinase, receptor, type 3	Plasma Membrane	kinase	NA	NA
MBOAT2	-0.361	8	membrane bound O-acyltransferase domain containing 2	unknown	enzyme	NA	NA
BAI3	-0.375	8	brain-specific angiogenesis inhibitor 3	Plasma Membrane	G-protein coupled receptor	Proneural	NA
CLIP3	-0.376	8	CAP-GLY domain containing linker protein 3	Cytoplasm	other	NA	NA
NDRG2	-0.392	8	NDRG family member 2	Cytoplasm	other	Neural	Proneural
MN1	-0.411	8	meningioma (disrupted in balanced translocation) 1	Nucleus	other	NA	NA
CCDC109B	0.463	7	coiled-coil domain containing 109B	unknown	other	Mesenchymal	NA
TOM1L1	0.458	7	target of myb1 (chicken)-like 1	Cytoplasm	other	NA	NA
TMEM106C	0.453	7	transmembrane protein 106C	unknown	other	NA	NA
PLP2	0.449	7	proteolipid protein 2 (colonic epithelium-enriched)	Cytoplasm	transporter	NA	NA
RPA3	0.442	7	replication protein A3, 14kDa	Nucleus	other	NA	NA
PPIC	0.437	7	peptidylprolyl isomerase C (cyclophilin C)	Cytoplasm	enzyme	NA	NA
IQCG	0.431	7	IQ motif containing G	unknown	other	NA	NA
CYB5R1	0.43	7	cytochrome b5 reductase 1	Cytoplasm	enzyme	NA	NA
TAX1BP3	0.427	7	Tax1 (human T-cell leukemia virus type I) binding protein 3	Nucleus	transcription regulator	NA	NA
PRPS2	0.425	7	phosphoribosyl pyrophosphate synthetase 2	unknown	kinase	NA	NA
NNMT	0.422	7	nicotinamide N-methyltransferase	Cytoplasm	enzyme	NA	NA
C1GALT1C1	0.417	7	C1GALT1-specific chaperone 1	Cytoplasm	enzyme	NA	NA
LDHA	0.415	7	lactate dehydrogenase A	Cytoplasm	enzyme	NA	NA
KLF10	0.415	7	Kruppel-like factor 10	Nucleus	transcription regulator	NA	NA
NMI	0.415	7	N-myc (and STAT) interactor	Cytoplasm	transcription regulator	NA	NA
RBBP8	0.414	7	retinoblastoma binding protein 8	Nucleus	enzyme	NA	NA
GGH	0.414	7	gamma-glutamyl hydrolase (conjugase, folylpolygammaglutamyl hydrolase)	Cytoplasm	peptidase	NA	NA
GCLM	0.412	7	glutamate-cysteine ligase, modifier subunit	Cytoplasm	enzyme	NA	NA
FAM129A	0.407	7	family with sequence similarity 129, member A	Cytoplasm	other	NA	NA
RND3	0.405	7	Rho family GTPase 3	Cytoplasm	enzyme	NA	NA
DYRK3	0.403	7	dual-specificity tyrosine-(Y)-phosphorylation regulated kinase 3	Nucleus	kinase	NA	NA
CAPG	0.402	7	capping protein (actin filament), gelsolin-like	Nucleus	other	NA	NA
LOX	0.401	7	lysyl oxidase	Extracellular Space	enzyme	Mesenchymal	NA
CCNB1	0.401	7	cyclin B1	Cytoplasm	kinase	NA	NA
ANXA2	0.4	7	annexin A2	Plasma Membrane	other	Mesenchymal	NA
TMSB10/TMSB4X	0.399	7	thymosin beta 10	Cytoplasm	other	NA	NA
P4HA2	0.396	7	prolyl 4-hydroxylase, alpha polypeptide II	Cytoplasm	enzyme	Mesenchymal	NA
SRP19	0.395	7	signal recognition particle 19kDa	Cytoplasm	other	NA	NA
DERL2	0.394	7	derlin 2	Cytoplasm	other	NA	NA
COL5A2	0.394	7	collagen, type V, alpha 2	Extracellular Space	other	NA	NA
PDIA4	0.391	7	protein disulfide isomerase family A, member 4	Cytoplasm	enzyme	NA	NA
GCH1	0.39	7	GTP cyclohydrolase 1	Cytoplasm	enzyme	NA	NA
BTG3	0.389	7	BTG family, member 3	Nucleus	other	NA	NA
TMEM248	0.389	7	transmembrane protein 248	unknown	other	NA	NA
AMIGO2	0.389	7	adhesion molecule with Ig-like domain 2	Plasma Membrane	other	NA	NA
ACAA2	0.388	7	acetyl-CoA acyltransferase 2	Cytoplasm	enzyme	NA	NA
ITGB3BP	0.388	7	integrin beta 3 binding protein (beta3-endonexin)	Nucleus	other	NA	NA
S100A4	0.387	7	S100 calcium binding protein A4	Cytoplasm	other	Mesenchymal	NA
CHI3L1	0.387	7	chitinase 3-like 1 (cartilage glycoprotein-39)	Extracellular Space	enzyme	Mesenchymal	Mesenchymal
CASP6	0.387	7	caspase 6, apoptosis-related cysteine peptidase	Cytoplasm	peptidase	NA	NA
GGCT	0.387	7	gamma-glutamylcyclotransferase	Cytoplasm	enzyme	NA	NA
CASP3	0.386	7	caspase 3, apoptosis-related cysteine peptidase	Cytoplasm	peptidase	NA	NA
PDPN	0.386	7	podoplanin	Plasma Membrane	transporter	Mesenchymal	Mesenchymal
HEBP2	0.385	7	heme binding protein 2	Cytoplasm	other	NA	NA
TIMP1	0.381	7	TIMP metallopeptidase inhibitor 1	Extracellular Space	other	Mesenchymal	Mesenchymal
FGFR1OP	0.381	7	FGFR1 oncogene partner	Cytoplasm	other	NA	NA
PRDX4	0.38	7	peroxiredoxin 4	Cytoplasm	enzyme	NA	NA
CASP4	0.38	7	caspase 4, apoptosis-related cysteine peptidase	Cytoplasm	peptidase	Mesenchymal	NA
GNG12	0.38	7	guanine nucleotide binding protein (G protein), gamma 12	Plasma Membrane	enzyme	NA	NA
RBP1	0.379	7	retinol binding protein 1, cellular	Extracellular Space	transporter	NA	NA
SLC31A1	0.379	7	solute carrier family 31 (copper transporters), member 1	Plasma Membrane	transporter	NA	NA
ACOT9	0.379	7	acyl-CoA thioesterase 9	Cytoplasm	enzyme	NA	NA
ACTR3	0.378	7	ARP3 actin-related protein 3 homolog (yeast)	Plasma Membrane	other	NA	NA
MYD88	0.378	7	myeloid differentiation primary response gene (88)	Plasma Membrane	other	NA	NA
RAP2B	0.377	7	RAP2B, member of RAS oncogene family	Plasma Membrane	enzyme	NA	NA
ARF4	0.375	7	ADP-ribosylation factor 4	Cytoplasm	enzyme	NA	NA
RNASE4	0.375	7	ribonuclease, RNase A family, 4	Extracellular Space	enzyme	NA	NA
TBC1D1	0.375	7	TBC1 (tre-2/USP6, BUB2, cdc16) domain family, member 1	Nucleus	other	NA	NA
C11orf63	0.375	7	chromosome 11 open reading frame 63	unknown	other	NA	NA
MRPS15	0.375	7	mitochondrial ribosomal protein S15	Cytoplasm	other	NA	NA
S100A10	0.374	7	S100 calcium binding protein A10	Cytoplasm	other	NA	NA
EPS8	0.374	7	epidermal growth factor receptor pathway substrate 8	Plasma Membrane	peptidase	NA	NA
DYNLT3	0.374	7	dynein, light chain, Tctex-type 3	Cytoplasm	other	NA	NA
RECQL	0.374	7	RecQ protein-like (DNA helicase Q1-like)	Nucleus	enzyme	NA	NA
SPA17	0.374	7	sperm autoantigenic protein 17	Plasma Membrane	other	NA	NA
HAT1	0.373	7	histone acetyltransferase 1	Nucleus	enzyme	NA	NA
SOD2	0.372	7	superoxide dismutase 2, mitochondrial	Cytoplasm	enzyme	NA	NA
CALD1	0.371	7	caldesmon 1	Cytoplasm	other	NA	NA
PTTG1	0.371	7	pituitary tumor-transforming 1	Nucleus	transcription regulator	NA	NA
RAB32	0.37	7	RAB32, member RAS oncogene family	Cytoplasm	other	Mesenchymal	NA
CD58	0.369	7	CD58 molecule	Plasma Membrane	other	NA	NA
PHTF1	0.369	7	putative homeodomain transcription factor 1	Nucleus	transcription regulator	NA	NA
TFRC	0.369	7	transferrin receptor (p90, CD71)	Plasma Membrane	transporter	NA	NA
PPCS	0.368	7	phosphopantothenoylcysteine synthetase	Cytoplasm	enzyme	NA	NA
CNIH4	0.367	7	cornichon homolog 4 (Drosophila)	Plasma Membrane	other	NA	NA
WTAP	0.366	7	Wilms tumor 1 associated protein	Nucleus	other	NA	NA
HOXC6	0.366	7	homeobox C6	Nucleus	transcription regulator	NA	NA
RARRES2	0.366	7	retinoic acid receptor responder (tazarotene induced) 2	Plasma Membrane	transmembrane receptor	NA	NA
SLC2A10	0.366	7	solute carrier family 2 (facilitated glucose transporter), member 10	Plasma Membrane	transporter	Classical	NA
ARPC2	0.364	7	actin related protein 2/3 complex, subunit 2, 34kDa	Cytoplasm	other	NA	NA
COQ2	0.364	7	coenzyme Q2 homolog, prenyltransferase (yeast)	Cytoplasm	enzyme	NA	NA
KDELR2	0.363	7	KDEL (Lys-Asp-Glu-Leu) endoplasmic reticulum protein retention receptor 2	Cytoplasm	other	NA	NA
LYZ	0.363	7	lysozyme	Extracellular Space	enzyme	NA	NA
TCTN1	0.363	7	tectonic family member 1	Extracellular Space	other	NA	NA
FNDC3B	0.363	7	fibronectin type III domain containing 3B	Cytoplasm	other	Mesenchymal	NA
LTF	0.361	7	lactotransferrin	Extracellular Space	peptidase	NA	NA
HSPB11	0.361	7	heat shock protein family B (small), member 11	Extracellular Space	other	NA	NA
IQGAP1	0.36	7	IQ motif containing GTPase activating protein 1	Cytoplasm	other	Mesenchymal	NA
CAST	0.36	7	calpastatin	Cytoplasm	peptidase	Mesenchymal	NA
STBD1	0.359	7	starch binding domain 1	Cytoplasm	other	NA	NA
ABCA5	0.359	7	ATP-binding cassette, sub-family A (ABC1), member 5	Plasma Membrane	transporter	NA	NA
LAMTOR2	0.359	7	late endosomal/lysosomal adaptor, MAPK and MTOR activator 2	Cytoplasm	other	NA	NA
SP100	0.357	7	SP100 nuclear antigen	Nucleus	transcription regulator	Mesenchymal	NA
SPAG4	0.357	7	sperm associated antigen 4	Cytoplasm	other	NA	NA
TXN	0.357	7	thioredoxin	Cytoplasm	enzyme	NA	NA
DENND1A	0.356	7	DENN/MADD domain containing 1A	Plasma Membrane	other	NA	NA
CLEC5A	0.356	7	C-type lectin domain family 5, member A	Plasma Membrane	other	NA	NA
TRIP4	0.355	7	thyroid hormone receptor interactor 4	Nucleus	transcription regulator	NA	NA
SERPINB1	0.355	7	serpin peptidase inhibitor, clade B (ovalbumin), member 1	Cytoplasm	other	NA	NA
AEBP1	0.354	7	AE binding protein 1	Nucleus	peptidase	NA	NA
NRP1	0.354	7	neuropilin 1	Plasma Membrane	transmembrane receptor	Mesenchymal	NA
CD163	0.352	7	CD163 molecule	Plasma Membrane	transmembrane receptor	NA	NA
MR1	0.351	7	major histocompatibility complex, class I-related	Plasma Membrane	transmembrane receptor	NA	NA
TWSG1	0.35	7	twisted gastrulation homolog 1 (Drosophila)	Extracellular Space	other	NA	NA
BCL10	0.349	7	B-cell CLL/lymphoma 10	Cytoplasm	transcription regulator	NA	NA
GUSB	0.348	7	glucuronidase, beta	Cytoplasm	enzyme	NA	NA
ORMDL2	0.348	7	ORM1-like 2 (S. cerevisiae)	Cytoplasm	other	NA	NA
TMEM45A	0.346	7	transmembrane protein 45A	Plasma Membrane	other	NA	NA
FAS	0.344	7	Fas (TNF receptor superfamily, member 6)	Plasma Membrane	transmembrane receptor	NA	NA
TPGS2	0.344	7	tubulin polyglutamylase complex subunit 2	Nucleus	other	NA	NA
CKS2	0.343	7	CDC28 protein kinase regulatory subunit 2	unknown	kinase	NA	NA
MAGOH	0.341	7	mago-nashi homolog, proliferation-associated (Drosophila)	Nucleus	other	NA	NA
HSPA5	0.341	7	heat shock 70kDa protein 5 (glucose-regulated protein, 78kDa)	Cytoplasm	enzyme	NA	NA
HMMR	0.338	7	hyaluronan-mediated motility receptor (RHAMM)	Plasma Membrane	other	NA	Proliferative
BUD31	0.337	7	BUD31 homolog (S. cerevisiae)	Nucleus	transcription regulator	NA	NA
TMCO1	0.337	7	transmembrane and coiled-coil domains 1	unknown	other	NA	NA
WDR77	0.336	7	WD repeat domain 77	Nucleus	transcription regulator	NA	NA
MLF1	0.336	7	myeloid leukemia factor 1	Nucleus	other	NA	NA
ETF1	0.336	7	eukaryotic translation termination factor 1	Cytoplasm	translation regulator	NA	NA
PDIA5	0.334	7	protein disulfide isomerase family A, member 5	Cytoplasm	enzyme	NA	NA
CEP112	0.334	7	centrosomal protein 112kDa	Cytoplasm	other	NA	NA
ELF4	0.333	7	E74-like factor 4 (ets domain transcription factor)	Nucleus	transcription regulator	Mesenchymal	NA
ECM2	0.333	7	extracellular matrix protein 2, female organ and adipocyte specific	Extracellular Space	other	NA	NA
SDC1	0.332	7	syndecan 1	Plasma Membrane	enzyme	NA	NA
GLRX	0.332	7	glutaredoxin (thioltransferase)	Cytoplasm	enzyme	NA	NA
GBP1	0.331	7	guanylate binding protein 1, interferon-inducible	Cytoplasm	enzyme	NA	NA
PDLIM3	0.331	7	PDZ and LIM domain 3	Cytoplasm	other	NA	NA
C1RL	0.331	7	complement component 1, r subcomponent-like	Extracellular Space	peptidase	NA	NA
PELO	0.33	7	pelota homolog (Drosophila)	Nucleus	other	NA	NA
ITGA4	0.329	7	integrin, alpha 4 (antigen CD49D, alpha 4 subunit of VLA-4 receptor)	Plasma Membrane	other	Mesenchymal	NA
AGA	0.328	7	aspartylglucosaminidase	Cytoplasm	enzyme	NA	NA
PTPN2	0.328	7	protein tyrosine phosphatase, non-receptor type 2	Cytoplasm	phosphatase	NA	NA
MALT1	0.328	7	mucosa associated lymphoid tissue lymphoma translocation gene 1	Cytoplasm	peptidase	NA	NA
IFNGR2	0.325	7	interferon gamma receptor 2 (interferon gamma transducer 1)	Plasma Membrane	transmembrane receptor	NA	NA
GNG5	0.324	7	guanine nucleotide binding protein (G protein), gamma 5	Plasma Membrane	other	NA	NA
HN1L	0.323	7	hematological and neurological expressed 1-like	Cytoplasm	other	NA	NA
DENND2D	0.323	7	DENN/MADD domain containing 2D	Cytoplasm	other	NA	NA
PDK3	0.322	7	pyruvate dehydrogenase kinase, isozyme 3	Cytoplasm	kinase	NA	NA
GPX7	0.322	7	glutathione peroxidase 7	unknown	enzyme	NA	NA
IGFBP5	0.321	7	insulin-like growth factor binding protein 5	Extracellular Space	other	NA	NA
LGALS8	0.321	7	lectin, galactoside-binding, soluble, 8	Extracellular Space	other	NA	NA
MOB1A	0.32	7	MOB kinase activator 1A	Plasma Membrane	other	NA	NA
SRPX2	0.32	7	sushi-repeat containing protein, X-linked 2	Cytoplasm	other	Mesenchymal	NA
CXCR4	0.32	7	chemokine (C-X-C motif) receptor 4	Plasma Membrane	G-protein coupled receptor	NA	NA
SOAT1	0.32	7	sterol O-acyltransferase 1	Cytoplasm	enzyme	NA	NA
FDX1	0.319	7	ferredoxin 1	Cytoplasm	transporter	NA	NA
SEL1L3	0.319	7	sel-1 suppressor of lin-12-like 3 (C. elegans)	unknown	other	NA	NA
PIGC	0.318	7	phosphatidylinositol glycan anchor biosynthesis, class C	Cytoplasm	enzyme	NA	NA
RCN1	0.317	7	reticulocalbin 1, EF-hand calcium binding domain	Cytoplasm	other	NA	NA
PLSCR1	0.317	7	phospholipid scramblase 1	Plasma Membrane	enzyme	NA	NA
DNASE1L1	0.317	7	deoxyribonuclease I-like 1	Cytoplasm	enzyme	NA	NA
SEC61B	0.317	7	Sec61 beta subunit	Cytoplasm	transporter	NA	NA
SCPEP1	0.316	7	serine carboxypeptidase 1	Cytoplasm	peptidase	Mesenchymal	NA
EN2	0.314	7	engrailed homeobox 2	Nucleus	transcription regulator	NA	NA
PEX13	0.312	7	peroxisomal biogenesis factor 13	Cytoplasm	transporter	NA	NA
COPB1	0.312	7	coatomer protein complex, subunit beta 1	Cytoplasm	transporter	NA	NA
PSMB4	0.312	7	proteasome (prosome, macropain) subunit, beta type, 4	Cytoplasm	peptidase	NA	NA
PRDX6	0.311	7	peroxiredoxin 6	Cytoplasm	enzyme	NA	NA
CPD	0.309	7	carboxypeptidase D	Extracellular Space	peptidase	NA	NA
CPVL	0.307	7	carboxypeptidase, vitellogenic-like	unknown	peptidase	NA	NA
ZDHHC13	0.307	7	zinc finger, DHHC-type containing 13	Nucleus	transcription regulator	NA	NA
TRAM1	0.306	7	translocation associated membrane protein 1	Cytoplasm	other	NA	NA
ZMYM6	0.304	7	zinc finger, MYM-type 6	Nucleus	other	NA	NA
LAMP2	0.302	7	lysosomal-associated membrane protein 2	Plasma Membrane	enzyme	NA	NA
FOXJ1	0.3	7	forkhead box J1	Nucleus	transcription regulator	NA	NA
CHIC2	0.299	7	cysteine-rich hydrophobic domain 2	Plasma Membrane	other	NA	NA
NMRK1	0.295	7	nicotinamide riboside kinase 1	unknown	kinase	NA	NA
GK	0.294	7	glycerol kinase	Cytoplasm	kinase	NA	NA
ARMC9	0.294	7	armadillo repeat containing 9	unknown	other	NA	NA
IL6	0.292	7	interleukin 6 (interferon, beta 2)	Extracellular Space	cytokine	NA	NA
BRCA1	0.291	7	breast cancer 1, early onset	Nucleus	transcription regulator	NA	NA
MINA	0.291	7	MYC induced nuclear antigen	Nucleus	other	NA	NA
HCCS	0.289	7	holocytochrome c synthase	Cytoplasm	enzyme	NA	NA
CA9	0.284	7	carbonic anhydrase IX	Nucleus	enzyme	NA	NA
SFRP4	0.282	7	secreted frizzled-related protein 4	Plasma Membrane	transmembrane receptor	NA	NA
GGCX	0.281	7	gamma-glutamyl carboxylase	Cytoplasm	enzyme	NA	NA
ATP6V0E1	0.278	7	ATPase, H+ transporting, lysosomal 9kDa, V0 subunit e1	Cytoplasm	transporter	NA	NA
HOXA9	0.263	7	homeobox A9	Nucleus	transcription regulator	NA	NA
GYG2	0.251	7	glycogenin 2	Cytoplasm	enzyme	NA	NA
PKP4	-0.257	7	plakophilin 4	Plasma Membrane	other	NA	NA
MMP16	-0.265	7	matrix metallopeptidase 16 (membrane-inserted)	Extracellular Space	peptidase	Proneural	NA
RALGPS1	-0.27	7	Ral GEF with PH domain and SH3 binding motif 1	Cytoplasm	other	Proneural	NA
ARHGEF12	-0.271	7	Rho guanine nucleotide exchange factor (GEF) 12	Cytoplasm	other	NA	NA
CAMTA1	-0.272	7	calmodulin binding transcription activator 1	unknown	other	NA	NA
NF1	-0.273	7	neurofibromin 1	Cytoplasm	other	NA	NA
PTK2	-0.273	7	PTK2 protein tyrosine kinase 2	Cytoplasm	kinase	NA	NA
MTMR2	-0.28	7	myotubularin related protein 2	Cytoplasm	phosphatase	NA	NA
ETV1	-0.28	7	ets variant 1	Nucleus	transcription regulator	NA	NA
NCOR1	-0.281	7	nuclear receptor corepressor 1	Nucleus	transcription regulator	NA	NA
MAPRE2	-0.292	7	microtubule-associated protein, RP/EB family, member 2	Cytoplasm	other	NA	NA
SLC24A3	-0.292	7	solute carrier family 24 (sodium/potassium/calcium exchanger), member 3	Plasma Membrane	transporter	NA	NA
GAD1	-0.293	7	glutamate decarboxylase 1 (brain, 67kDa)	Cytoplasm	enzyme	NA	NA
ACTN2	-0.294	7	actinin, alpha 2	Nucleus	transcription regulator	NA	NA
CUX2	-0.295	7	cut-like homeobox 2	Nucleus	transcription regulator	NA	NA
RUNX1T1	-0.297	7	runt-related transcription factor 1; translocated to, 1 (cyclin D-related)	Nucleus	transcription regulator	NA	NA
ANGEL1	-0.298	7	angel homolog 1 (Drosophila)	Extracellular Space	other	NA	NA
C1orf61	-0.3	7	chromosome 1 open reading frame 61	unknown	other	Proneural	NA
NCOA2	-0.301	7	nuclear receptor coactivator 2	Nucleus	transcription regulator	NA	NA
GNAO1	-0.302	7	guanine nucleotide binding protein (G protein), alpha activating activity polypeptide O	Plasma Membrane	enzyme	NA	NA
CDC14B	-0.303	7	CDC14 cell division cycle 14 homolog B (S. cerevisiae)	Nucleus	phosphatase	NA	NA
DOPEY1	-0.303	7	dopey family member 1	Cytoplasm	other	NA	NA
FYN	-0.305	7	FYN oncogene related to SRC, FGR, YES	Plasma Membrane	kinase	NA	NA
CAMSAP2	-0.305	7	calmodulin regulated spectrin-associated protein family, member 2	unknown	other	NA	NA
EZH1	-0.307	7	enhancer of zeste homolog 1 (Drosophila)	Nucleus	enzyme	NA	NA
CLASP2	-0.307	7	cytoplasmic linker associated protein 2	Cytoplasm	other	Proneural	NA
MXD4	-0.308	7	MAX dimerization protein 4	Nucleus	transcription regulator	NA	NA
APBB2	-0.309	7	amyloid beta (A4) precursor protein-binding, family B, member 2	Cytoplasm	other	NA	NA
SEZ6L	-0.31	7	seizure related 6 homolog (mouse)-like	Plasma Membrane	other	Proneural	NA
CSTF2T	-0.31	7	cleavage stimulation factor, 3' pre-RNA, subunit 2, 64kDa, tau variant	Nucleus	other	NA	NA
KIF3C	-0.311	7	kinesin family member 3C	Cytoplasm	other	NA	NA
CCDC85B	-0.311	7	coiled-coil domain containing 85B	Cytoplasm	other	NA	NA
RAPGEF4	-0.311	7	Rap guanine nucleotide exchange factor (GEF) 4	Cytoplasm	other	NA	NA
AATK	-0.311	7	apoptosis-associated tyrosine kinase	Cytoplasm	kinase	NA	NA
PCDH17	-0.313	7	protocadherin 17	unknown	other	NA	NA
UPF2	-0.314	7	UPF2 regulator of nonsense transcripts homolog (yeast)	Cytoplasm	other	NA	NA
HECTD4	-0.315	7	HECT domain containing E3 ubiquitin protein ligase 4	unknown	other	NA	NA
ADD1	-0.316	7	adducin 1 (alpha)	Cytoplasm	other	NA	NA
CYFIP2	-0.316	7	cytoplasmic FMR1 interacting protein 2	Cytoplasm	other	NA	NA
NDRG3	-0.316	7	NDRG family member 3	Cytoplasm	other	NA	NA
NRXN2	-0.317	7	neurexin 2	Plasma Membrane	transporter	Proneural	NA
TCF25	-0.317	7	transcription factor 25 (basic helix-loop-helix)	Nucleus	transcription regulator	NA	NA
AMOTL2	-0.318	7	angiomotin like 2	Plasma Membrane	other	Proneural	NA
MTSS1	-0.318	7	metastasis suppressor 1	Cytoplasm	other	Proneural	NA
VPS52	-0.318	7	vacuolar protein sorting 52 homolog (S. cerevisiae)	Cytoplasm	other	NA	NA
SSTR2	-0.318	7	somatostatin receptor 2	Plasma Membrane	G-protein coupled receptor	NA	NA
MYO10	-0.319	7	myosin X	Cytoplasm	other	Proneural	NA
DNM3	-0.32	7	dynamin 3	Cytoplasm	enzyme	Proneural	NA
MARCKSL1	-0.321	7	MARCKS-like 1	Cytoplasm	other	Proneural	NA
PDE2A	-0.321	7	phosphodiesterase 2A, cGMP-stimulated	Cytoplasm	enzyme	NA	NA
KCND3	-0.322	7	potassium voltage-gated channel, Shal-related subfamily, member 3	Plasma Membrane	ion channel	NA	NA
PCCA	-0.323	7	propionyl CoA carboxylase, alpha polypeptide	Cytoplasm	enzyme	NA	NA
SNX27	-0.324	7	sorting nexin family member 27	Cytoplasm	other	NA	NA
SLIT1	-0.326	7	slit homolog 1 (Drosophila)	Extracellular Space	other	NA	NA
SOBP	-0.327	7	sine oculis binding protein homolog (Drosophila)	Nucleus	other	NA	NA
EEF1A1	-0.329	7	eukaryotic translation elongation factor 1 alpha 1	Cytoplasm	translation regulator	NA	NA
LGR5	-0.329	7	leucine-rich repeat containing G protein-coupled receptor 5	Plasma Membrane	G-protein coupled receptor	NA	NA
SMARCC2	-0.33	7	SWI/SNF related, matrix associated, actin dependent regulator of chromatin, subfamily c, member 2	Nucleus	transcription regulator	NA	NA
SLC7A1	-0.331	7	solute carrier family 7 (cationic amino acid transporter, y+ system), member 1	Plasma Membrane	transporter	NA	NA
RAB2A	-0.331	7	RAB2A, member RAS oncogene family	Cytoplasm	enzyme	NA	NA
BCL2L2	-0.331	7	BCL2-like 2	Cytoplasm	other	NA	NA
ASIC1	-0.332	7	acid-sensing (proton-gated) ion channel 1	Plasma Membrane	ion channel	NA	NA
MGEA5	-0.333	7	meningioma expressed antigen 5 (hyaluronidase)	Cytoplasm	enzyme	NA	NA
DYNC1LI2	-0.333	7	dynein, cytoplasmic 1, light intermediate chain 2	Cytoplasm	other	NA	NA
CASC3	-0.333	7	cancer susceptibility candidate 3	Nucleus	other	NA	NA
AKT3	-0.333	7	v-akt murine thymoma viral oncogene homolog 3 (protein kinase B, gamma)	Cytoplasm	kinase	NA	NA
EEF2	-0.335	7	eukaryotic translation elongation factor 2	Cytoplasm	translation regulator	NA	NA
BCAN	-0.336	7	brevican	Extracellular Space	other	Proneural	NA
MOAP1	-0.337	7	modulator of apoptosis 1	Cytoplasm	other	NA	NA
SALL2	-0.337	7	sal-like 2 (Drosophila)	Nucleus	transcription regulator	NA	NA
KCNQ2	-0.338	7	potassium voltage-gated channel, KQT-like subfamily, member 2	Plasma Membrane	ion channel	NA	NA
ASTN1	-0.339	7	astrotactin 1	unknown	other	NA	NA
LOC157562	-0.339	7	uncharacterized LOC157562	unknown	other	NA	NA
CLCN6	-0.34	7	chloride channel, voltage-sensitive 6	Plasma Membrane	ion channel	NA	NA
SLCO1A2	-0.34	7	solute carrier organic anion transporter family, member 1A2	Plasma Membrane	transporter	Neural	NA
FTO	-0.34	7	fat mass and obesity associated	Nucleus	other	NA	NA
LPHN3	-0.34	7	latrophilin 3	Plasma Membrane	G-protein coupled receptor	Proneural	NA
C16orf45	-0.34	7	chromosome 16 open reading frame 45	unknown	other	NA	NA
SLC22A17	-0.34	7	solute carrier family 22, member 17	Plasma Membrane	transporter	NA	NA
TMCC1	-0.342	7	transmembrane and coiled-coil domain family 1	unknown	other	Proneural	NA
FXYD6	-0.342	7	FXYD domain containing ion transport regulator 6	Plasma Membrane	ion channel	Proneural	NA
CYP2E1	-0.343	7	cytochrome P450, family 2, subfamily E, polypeptide 1	Cytoplasm	enzyme	NA	NA
CNNM2	-0.343	7	cyclin M2	Plasma Membrane	other	NA	NA
ZNF609	-0.343	7	zinc finger protein 609	unknown	other	NA	NA
INPP5A	-0.344	7	inositol polyphosphate-5-phosphatase, 40kDa	Plasma Membrane	phosphatase	NA	NA
RUNDC3A	-0.345	7	RUN domain containing 3A	Cytoplasm	other	NA	NA
GLTSCR2	-0.345	7	glioma tumor suppressor candidate region gene 2	Cytoplasm	other	NA	NA
SEMA4G	-0.345	7	sema domain, immunoglobulin domain (Ig), transmembrane domain (TM) and short cytoplasmic domain, (semaphorin) 4G	Plasma Membrane	other	NA	NA
CIRBP	-0.346	7	cold inducible RNA binding protein	Nucleus	translation regulator	NA	NA
HLF	-0.346	7	hepatic leukemia factor	Nucleus	transcription regulator	NA	NA
SLC6A1	-0.347	7	solute carrier family 6 (neurotransmitter transporter, GABA), member 1	Plasma Membrane	transporter	NA	NA
SCD	-0.348	7	stearoyl-CoA desaturase (delta-9-desaturase)	Cytoplasm	enzyme	NA	NA
CEP68	-0.348	7	centrosomal protein 68kDa	Cytoplasm	other	NA	NA
DUSP26	-0.349	7	dual specificity phosphatase 26 (putative)	Cytoplasm	enzyme	Proneural	NA
UBXN1	-0.35	7	UBX domain protein 1	Cytoplasm	other	NA	NA
TNK2	-0.35	7	tyrosine kinase, non-receptor, 2	Cytoplasm	kinase	NA	NA
RPL4	-0.354	7	ribosomal protein L4	Cytoplasm	enzyme	NA	NA
DLL3	-0.354	7	delta-like 3 (Drosophila)	Extracellular Space	other	Proneural	Proneural
NCAM1	-0.356	7	neural cell adhesion molecule 1	Plasma Membrane	other	Proneural	Proneural
8-Mar	-0.357	7	membrane-associated ring finger (C3HC4) 8, E3 ubiquitin protein ligase	Cytoplasm	enzyme	NA	NA
UBL3	-0.358	7	ubiquitin-like 3	Cytoplasm	other	NA	NA
NET1	-0.359	7	neuroepithelial cell transforming 1	Nucleus	other	NA	NA
FRY	-0.359	7	furry homolog (Drosophila)	Extracellular Space	other	NA	NA
RASL10A	-0.359	7	RAS-like, family 10, member A	Nucleus	enzyme	NA	Proneural
SEC31B	-0.362	7	SEC31 homolog B (S. cerevisiae)	unknown	other	NA	NA
ADO	-0.362	7	2-aminoethanethiol (cysteamine) dioxygenase	Cytoplasm	other	NA	NA
RABGAP1	-0.363	7	RAB GTPase activating protein 1	Cytoplasm	other	NA	NA
GRIA2	-0.364	7	glutamate receptor, ionotropic, AMPA 2	Plasma Membrane	ion channel	Proneural	NA
LRRTM2	-0.365	7	leucine rich repeat transmembrane neuronal 2	Plasma Membrane	other	NA	NA
ALDH5A1	-0.366	7	aldehyde dehydrogenase 5 family, member A1	Cytoplasm	enzyme	NA	NA
LRP4	-0.367	7	low density lipoprotein receptor-related protein 4	Extracellular Space	other	NA	NA
B3GAT1	-0.367	7	beta-1,3-glucuronyltransferase 1 (glucuronosyltransferase P)	Cytoplasm	enzyme	NA	NA
OLIG2	-0.368	7	oligodendrocyte lineage transcription factor 2	Nucleus	transcription regulator	Proneural	NA
ABHD6	-0.369	7	abhydrolase domain containing 6	Cytoplasm	enzyme	NA	NA
BCL7A	-0.371	7	B-cell CLL/lymphoma 7A	unknown	other	Proneural	NA
AKAP6	-0.373	7	A kinase (PRKA) anchor protein 6	Nucleus	other	NA	NA
ATP9A	-0.373	7	ATPase, class II, type 9A	Plasma Membrane	transporter	NA	NA
KAT6B	-0.376	7	K(lysine) acetyltransferase 6B	Nucleus	enzyme	NA	NA
KIAA1279	-0.376	7	KIAA1279	Cytoplasm	enzyme	NA	NA
ZMYND11	-0.377	7	zinc finger, MYND-type containing 11	Nucleus	other	NA	NA
EIF3L	-0.379	7	eukaryotic translation initiation factor 3, subunit L	Cytoplasm	other	NA	NA
FBXW4	-0.38	7	F-box and WD repeat domain containing 4	unknown	other	NA	NA
SCAPER	-0.381	7	S-phase cyclin A-associated protein in the ER	Extracellular Space	other	NA	NA
BAI1	-0.382	7	brain-specific angiogenesis inhibitor 1	Plasma Membrane	G-protein coupled receptor	NA	NA
APBA2	-0.384	7	amyloid beta (A4) precursor protein-binding, family A, member 2	Cytoplasm	transporter	NA	NA
WASF3	-0.385	7	WAS protein family, member 3	Cytoplasm	other	NA	NA
ALDH6A1	-0.39	7	aldehyde dehydrogenase 6 family, member A1	Cytoplasm	enzyme	NA	NA
ABLIM1	-0.391	7	actin binding LIM protein 1	Cytoplasm	other	NA	NA
RPL3	-0.392	7	ribosomal protein L3	Cytoplasm	other	NA	NA
BCR	-0.396	7	breakpoint cluster region	Cytoplasm	kinase	NA	NA
GAB2	-0.396	7	GRB2-associated binding protein 2	Cytoplasm	other	NA	NA
FLRT1	-0.41	7	fibronectin leucine rich transmembrane protein 1	Plasma Membrane	other	Proneural	NA
CCBL1	-0.431	7	cysteine conjugate-beta lyase, cytoplasmic	Cytoplasm	enzyme	NA	NA
VPS51	-0.437	7	vacuolar protein sorting 51 homolog (S. cerevisiae)	unknown	other	NA	NA
GLUD1	-0.472	7	glutamate dehydrogenase 1	Cytoplasm	enzyme	NA	NA
ZCCHC24	-0.491	7	zinc finger, CCHC domain containing 24	unknown	other	NA	NA
TRAF5	0.442	6	TNF receptor-associated factor 5	Cytoplasm	transporter	NA	NA
ARL4C	0.44	6	ADP-ribosylation factor-like 4C	Nucleus	enzyme	NA	NA
EMP3	0.436	6	epithelial membrane protein 3	Plasma Membrane	other	Mesenchymal	NA
TTC26	0.422	6	tetratricopeptide repeat domain 26	unknown	other	NA	NA
PLOD2	0.414	6	procollagen-lysine, 2-oxoglutarate 5-dioxygenase 2	Cytoplasm	enzyme	NA	NA
IGFBP2	0.414	6	insulin-like growth factor binding protein 2, 36kDa	Extracellular Space	other	NA	NA
RPAP3	0.412	6	RNA polymerase II associated protein 3	unknown	enzyme	NA	NA
KPNA2	0.411	6	karyopherin alpha 2 (RAG cohort 1, importin alpha 1)	Nucleus	transporter	NA	NA
ACTN1	0.409	6	actinin, alpha 1	Cytoplasm	other	NA	NA
SMC4	0.406	6	structural maintenance of chromosomes 4	Nucleus	transporter	NA	NA
KIF20A	0.406	6	kinesin family member 20A	Cytoplasm	transporter	NA	NA
LOXL1	0.404	6	lysyl oxidase-like 1	Extracellular Space	enzyme	NA	NA
SQRDL	0.402	6	sulfide quinone reductase-like (yeast)	Cytoplasm	enzyme	Mesenchymal	NA
SHCBP1	0.401	6	SHC SH2-domain binding protein 1	unknown	other	NA	NA
SH3BGR	0.398	6	SH3 domain binding glutamic acid-rich protein	Cytoplasm	other	NA	NA
PGK1	0.397	6	phosphoglycerate kinase 1	Cytoplasm	kinase	NA	NA
CYB561D2	0.396	6	cytochrome b-561 domain containing 2	unknown	enzyme	NA	NA
PARP12	0.396	6	poly (ADP-ribose) polymerase family, member 12	Nucleus	other	NA	NA
CHI3L2	0.395	6	chitinase 3-like 2	Extracellular Space	enzyme	NA	NA
FAM111A	0.395	6	family with sequence similarity 111, member A	unknown	other	NA	NA
ECT2	0.394	6	epithelial cell transforming sequence 2 oncogene	Nucleus	other	NA	NA
RRM2	0.392	6	ribonucleotide reductase M2	Nucleus	enzyme	NA	NA
CETN2	0.392	6	centrin, EF-hand protein, 2	Nucleus	enzyme	NA	NA
VEGFA	0.392	6	vascular endothelial growth factor A	Extracellular Space	growth factor	NA	NA
STEAP1	0.39	6	six transmembrane epithelial antigen of the prostate 1	Plasma Membrane	transporter	NA	NA
FOSL2	0.389	6	FOS-like antigen 2	Nucleus	transcription regulator	NA	Mesenchymal
GLB1	0.388	6	galactosidase, beta 1	Cytoplasm	enzyme	NA	NA
COL1A2	0.387	6	collagen, type I, alpha 2	Extracellular Space	other	Mesenchymal	NA
HS2ST1	0.387	6	heparan sulfate 2-O-sulfotransferase 1	Cytoplasm	enzyme	NA	NA
CDC20	0.385	6	cell division cycle 20 homolog (S. cerevisiae)	Nucleus	other	NA	NA
ANXA2P2	0.384	6	annexin A2 pseudogene 2	unknown	other	NA	NA
P4HB	0.383	6	prolyl 4-hydroxylase, beta polypeptide	Cytoplasm	enzyme	NA	NA
CDKN3	0.382	6	cyclin-dependent kinase inhibitor 3	Nucleus	phosphatase	NA	NA
TP73-AS1	0.381	6	TP73 antisense RNA 1	unknown	other	NA	NA
MCM2	0.38	6	minichromosome maintenance complex component 2	Nucleus	enzyme	NA	NA
NAT1	0.38	6	N-acetyltransferase 1 (arylamine N-acetyltransferase)	Cytoplasm	enzyme	NA	NA
EFHC2	0.38	6	EF-hand domain (C-terminal) containing 2	unknown	other	NA	NA
CLEC2B	0.379	6	C-type lectin domain family 2, member B	Plasma Membrane	other	Mesenchymal	NA
NUP37	0.378	6	nucleoporin 37kDa	Nucleus	transporter	NA	NA
SHOX2	0.377	6	short stature homeobox 2	Nucleus	transcription regulator	Classical	NA
G0S2	0.377	6	G0/G1switch 2	Cytoplasm	other	NA	NA
RARS	0.376	6	arginyl-tRNA synthetase	Cytoplasm	enzyme	NA	NA
KIAA0101	0.376	6	KIAA0101	Nucleus	other	NA	NA
HMGB2	0.375	6	high mobility group box 2	Nucleus	transcription regulator	NA	NA
CXorf40A/CXorf40B	0.374	6	chromosome X open reading frame 40A	unknown	other	NA	NA
SLC10A3	0.371	6	solute carrier family 10 (sodium/bile acid cotransporter family), member 3	Plasma Membrane	transporter	Mesenchymal	NA
TTF2	0.37	6	transcription termination factor, RNA polymerase II	Nucleus	transcription regulator	NA	NA
DNALI1	0.37	6	dynein, axonemal, light intermediate chain 1	Cytoplasm	other	NA	NA
ZWILCH	0.37	6	Zwilch, kinetochore associated, homolog (Drosophila)	Nucleus	other	NA	NA
CEP55	0.37	6	centrosomal protein 55kDa	Cytoplasm	other	NA	NA
ADM	0.369	6	adrenomedullin	Extracellular Space	other	NA	NA
UPP1	0.369	6	uridine phosphorylase 1	Cytoplasm	enzyme	NA	NA
CDK2	0.369	6	cyclin-dependent kinase 2	Nucleus	kinase	NA	NA
TPPP3	0.369	6	tubulin polymerization-promoting protein family member 3	unknown	other	NA	NA
LRRFIP1	0.368	6	leucine rich repeat (in FLII) interacting protein 1	Cytoplasm	other	Mesenchymal	NA
TYMS	0.368	6	thymidylate synthetase	Nucleus	enzyme	NA	NA
MELK	0.368	6	maternal embryonic leucine zipper kinase	Cytoplasm	kinase	NA	NA
TPM4	0.368	6	tropomyosin 4	Cytoplasm	other	NA	NA
KIF4A	0.367	6	kinesin family member 4A	Nucleus	other	NA	NA
NCAPG	0.367	6	non-SMC condensin I complex, subunit G	Nucleus	other	NA	NA
FABP5	0.366	6	fatty acid binding protein 5 (psoriasis-associated)	Cytoplasm	transporter	NA	NA
ZNF217	0.365	6	zinc finger protein 217	Nucleus	transcription regulator	Mesenchymal	NA
H2AFZ	0.365	6	H2A histone family, member Z	Nucleus	other	NA	NA
RPN2	0.364	6	ribophorin II	Cytoplasm	enzyme	NA	NA
SLC30A5	0.364	6	solute carrier family 30 (zinc transporter), member 5	Plasma Membrane	transporter	NA	NA
C1R	0.363	6	complement component 1, r subcomponent	Extracellular Space	peptidase	NA	NA
DSN1	0.363	6	DSN1, MIND kinetochore complex component, homolog (S. cerevisiae)	Nucleus	other	NA	NA
EOGT	0.363	6	EGF domain-specific O-linked N-acetylglucosamine (GlcNAc) transferase	unknown	enzyme	NA	NA
CEBPG	0.361	6	CCAAT/enhancer binding protein (C/EBP), gamma	Nucleus	transcription regulator	NA	NA
CHEK1	0.36	6	checkpoint kinase 1	Nucleus	kinase	NA	NA
UAP1	0.36	6	UDP-N-acteylglucosamine pyrophosphorylase 1	Nucleus	enzyme	Mesenchymal	NA
HSP90B1	0.358	6	heat shock protein 90kDa beta (Grp94), member 1	Cytoplasm	other	NA	NA
RAB36	0.358	6	RAB36, member RAS oncogene family	Cytoplasm	enzyme	NA	NA
MLF1IP	0.358	6	MLF1 interacting protein	Nucleus	other	NA	NA
THBS1	0.357	6	thrombospondin 1	Extracellular Space	other	Mesenchymal	NA
DCTD	0.357	6	dCMP deaminase	Cytoplasm	enzyme	NA	NA
GEMIN6	0.357	6	gem (nuclear organelle) associated protein 6	Nucleus	other	NA	NA
PYGL	0.356	6	phosphorylase, glycogen, liver	Cytoplasm	enzyme	Mesenchymal	NA
CENPE	0.355	6	centromere protein E, 312kDa	Nucleus	other	NA	NA
HOXA5	0.355	6	homeobox A5	Nucleus	transcription regulator	NA	NA
MCM6	0.354	6	minichromosome maintenance complex component 6	Nucleus	enzyme	NA	NA
NDC80	0.354	6	NDC80 kinetochore complex component homolog (S. cerevisiae)	Nucleus	other	NA	NA
MIR22HG	0.354	6	MIR22 host gene (non-protein coding)	unknown	other	NA	NA
CASP7	0.354	6	caspase 7, apoptosis-related cysteine peptidase	Cytoplasm	peptidase	NA	NA
HSPA6	0.353	6	heat shock 70kDa protein 6 (HSP70B')	unknown	other	NA	NA
CHAF1B	0.353	6	chromatin assembly factor 1, subunit B (p60)	Nucleus	other	NA	NA
NAMPT	0.353	6	nicotinamide phosphoribosyltransferase	Extracellular Space	cytokine	NA	NA
FKBP11	0.353	6	FK506 binding protein 11, 19 kDa	Cytoplasm	enzyme	NA	NA
GBE1	0.353	6	glucan (1,4-alpha-), branching enzyme 1	Cytoplasm	enzyme	NA	NA
SPAG1	0.353	6	sperm associated antigen 1	Cytoplasm	other	NA	NA
SHFM1	0.353	6	split hand/foot malformation (ectrodactyly) type 1	Nucleus	peptidase	NA	NA
FPGT	0.352	6	fucose-1-phosphate guanylyltransferase	Cytoplasm	enzyme	NA	NA
MDK	0.352	6	midkine (neurite growth-promoting factor 2)	Extracellular Space	growth factor	NA	NA
PCNA	0.351	6	proliferating cell nuclear antigen	Nucleus	enzyme	NA	NA
CENPA	0.351	6	centromere protein A	Nucleus	other	NA	NA
MCFD2	0.351	6	multiple coagulation factor deficiency 2	Cytoplasm	other	NA	NA
CAPZA1	0.35	6	capping protein (actin filament) muscle Z-line, alpha 1	Cytoplasm	other	NA	NA
S100A2	0.35	6	S100 calcium binding protein A2	Cytoplasm	other	NA	NA
HDAC3	0.35	6	histone deacetylase 3	Nucleus	transcription regulator	NA	NA
AURKA	0.349	6	aurora kinase A	Nucleus	kinase	NA	NA
STC1	0.349	6	stanniocalcin 1	Extracellular Space	kinase	NA	NA
CA3	0.349	6	carbonic anhydrase III, muscle specific	Cytoplasm	enzyme	NA	NA
SLC16A4	0.349	6	solute carrier family 16, member 4 (monocarboxylic acid transporter 5)	Plasma Membrane	transporter	NA	NA
SNAI2	0.349	6	snail homolog 2 (Drosophila)	Nucleus	transcription regulator	NA	NA
MRPL17	0.349	6	mitochondrial ribosomal protein L17	Cytoplasm	other	NA	NA
UBE2A	0.349	6	ubiquitin-conjugating enzyme E2A	Cytoplasm	enzyme	NA	NA
FN1	0.348	6	fibronectin 1	Extracellular Space	enzyme	NA	NA
TIPIN	0.348	6	TIMELESS interacting protein	Nucleus	other	NA	NA
DDOST	0.348	6	dolichyl-diphosphooligosaccharide--protein glycosyltransferase	Cytoplasm	enzyme	NA	NA
C20orf24	0.347	6	chromosome 20 open reading frame 24	Cytoplasm	other	NA	NA
USP1	0.346	6	ubiquitin specific peptidase 1	Cytoplasm	peptidase	NA	NA
ABCC1	0.346	6	ATP-binding cassette, sub-family C (CFTR/MRP), member 1	Plasma Membrane	transporter	NA	NA
DLGAP5	0.346	6	discs, large (Drosophila) homolog-associated protein 5	Nucleus	phosphatase	NA	NA
CDC6	0.346	6	cell division cycle 6 homolog (S. cerevisiae)	Nucleus	other	NA	NA
CRIP1	0.346	6	cysteine-rich protein 1 (intestinal)	Cytoplasm	other	NA	NA
NUSAP1	0.346	6	nucleolar and spindle associated protein 1	Nucleus	other	NA	NA
C21orf62	0.346	6	chromosome 21 open reading frame 62	unknown	other	NA	NA
SP140L	0.345	6	SP140 nuclear body protein-like	unknown	other	NA	NA
GLT8D1	0.345	6	glycosyltransferase 8 domain containing 1	Cytoplasm	enzyme	NA	NA
PALLD	0.343	6	palladin, cytoskeletal associated protein	Cytoplasm	other	NA	NA
RPN1	0.343	6	ribophorin I	Cytoplasm	enzyme	NA	NA
MCTS1	0.343	6	malignant T cell amplified sequence 1	Cytoplasm	other	NA	NA
GPN1	0.342	6	GPN-loop GTPase 1	Nucleus	transcription regulator	NA	NA
PSMA5	0.342	6	proteasome (prosome, macropain) subunit, alpha type, 5	Cytoplasm	peptidase	NA	NA
PSMC2	0.341	6	proteasome (prosome, macropain) 26S subunit, ATPase, 2	Nucleus	peptidase	NA	NA
CCNB2	0.34	6	cyclin B2	Cytoplasm	other	NA	NA
CCNA2	0.34	6	cyclin A2	Nucleus	other	NA	NA
WBP5	0.34	6	WW domain binding protein 5	unknown	other	NA	NA
GRB10	0.339	6	growth factor receptor-bound protein 10	Cytoplasm	other	NA	NA
MYOF	0.338	6	myoferlin	Nucleus	other	NA	NA
BUB1	0.338	6	budding uninhibited by benzimidazoles 1 homolog (yeast)	Nucleus	kinase	NA	NA
TMEM194A	0.338	6	transmembrane protein 194A	unknown	other	NA	NA
REXO2	0.338	6	REX2, RNA exonuclease 2 homolog (S. cerevisiae)	Cytoplasm	enzyme	NA	NA
ARNTL2	0.338	6	aryl hydrocarbon receptor nuclear translocator-like 2	Nucleus	transcription regulator	NA	NA
PSME2	0.337	6	proteasome (prosome, macropain) activator subunit 2 (PA28 beta)	Cytoplasm	peptidase	NA	NA
BIRC5	0.337	6	baculoviral IAP repeat containing 5	Cytoplasm	other	NA	NA
PLAUR	0.337	6	plasminogen activator, urokinase receptor	Plasma Membrane	transmembrane receptor	Mesenchymal	NA
WEE1	0.337	6	WEE1 homolog (S. pombe)	Nucleus	kinase	NA	NA
LMAN2	0.336	6	lectin, mannose-binding 2	Cytoplasm	transporter	NA	NA
RBMS1	0.336	6	RNA binding motif, single stranded interacting protein 1	Nucleus	other	Mesenchymal	NA
CDKN2C	0.336	6	cyclin-dependent kinase inhibitor 2C (p18, inhibits CDK4)	Nucleus	transcription regulator	NA	NA
UQCRQ	0.336	6	ubiquinol-cytochrome c reductase, complex III subunit VII, 9.5kDa	Cytoplasm	enzyme	NA	NA
YIPF5	0.336	6	Yip1 domain family, member 5	unknown	other	NA	NA
CYBRD1	0.335	6	cytochrome b reductase 1	Cytoplasm	enzyme	Mesenchymal	NA
KIAA0895	0.335	6	KIAA0895	unknown	other	NA	NA
MRPL22	0.335	6	mitochondrial ribosomal protein L22	Cytoplasm	other	NA	NA
SHC1	0.334	6	SHC (Src homology 2 domain containing) transforming protein 1	Cytoplasm	kinase	Mesenchymal	NA
EFHC1	0.333	6	EF-hand domain (C-terminal) containing 1	Cytoplasm	other	NA	NA
OSTM1	0.333	6	osteopetrosis associated transmembrane protein 1	Plasma Membrane	other	NA	NA
KNTC1	0.332	6	kinetochore associated 1	Nucleus	other	NA	NA
ASPM	0.332	6	asp (abnormal spindle) homolog, microcephaly associated (Drosophila)	Nucleus	other	NA	NA
COX7B	0.332	6	cytochrome c oxidase subunit VIIb	Cytoplasm	enzyme	NA	NA
COPB2	0.332	6	coatomer protein complex, subunit beta 2 (beta prime)	Cytoplasm	transporter	NA	NA
BACE2	0.331	6	beta-site APP-cleaving enzyme 2	Cytoplasm	peptidase	NA	NA
CFI	0.33	6	complement factor I	Extracellular Space	peptidase	NA	NA
AGFG1	0.33	6	ArfGAP with FG repeats 1	Nucleus	other	NA	NA
POP4	0.33	6	processing of precursor 4, ribonuclease P/MRP subunit (S. cerevisiae)	Nucleus	enzyme	NA	NA
SNAPC1	0.33	6	small nuclear RNA activating complex, polypeptide 1, 43kDa	Nucleus	other	NA	NA
FCGBP	0.329	6	Fc fragment of IgG binding protein	Extracellular Space	other	NA	NA
KCTD9	0.329	6	potassium channel tetramerisation domain containing 9	unknown	other	NA	NA
MNS1	0.329	6	meiosis-specific nuclear structural 1	unknown	other	NA	NA
IFI44	0.329	6	interferon-induced protein 44	Cytoplasm	other	NA	NA
SYNPO	0.328	6	synaptopodin	Cytoplasm	other	NA	NA
CRYZ	0.328	6	crystallin, zeta (quinone reductase)	Cytoplasm	enzyme	NA	NA
FRZB	0.328	6	frizzled-related protein	Extracellular Space	other	NA	NA
NEK2	0.328	6	NIMA (never in mitosis gene a)-related kinase 2	Cytoplasm	kinase	NA	NA
SPON2	0.328	6	spondin 2, extracellular matrix protein	Extracellular Space	other	NA	NA
DERL1	0.328	6	derlin 1	Cytoplasm	other	NA	NA
TOP2A	0.326	6	topoisomerase (DNA) II alpha 170kDa	Nucleus	enzyme	NA	NA
IRAK1	0.326	6	interleukin-1 receptor-associated kinase 1	Plasma Membrane	kinase	NA	NA
RIT1	0.326	6	Ras-like without CAAX 1	Plasma Membrane	enzyme	NA	NA
KCNMB1	0.326	6	potassium large conductance calcium-activated channel, subfamily M, beta member 1	Plasma Membrane	ion channel	NA	NA
CD164	0.326	6	CD164 molecule, sialomucin	Plasma Membrane	other	NA	NA
ANXA4	0.325	6	annexin A4	Plasma Membrane	other	Mesenchymal	NA
GEM	0.325	6	GTP binding protein overexpressed in skeletal muscle	Plasma Membrane	enzyme	NA	NA
SLC35A3	0.323	6	solute carrier family 35 (UDP-N-acetylglucosamine (UDP-GlcNAc) transporter), member A3	Cytoplasm	transporter	NA	NA
CASP8	0.323	6	caspase 8, apoptosis-related cysteine peptidase	Nucleus	peptidase	Mesenchymal	NA
TNFRSF14	0.323	6	tumor necrosis factor receptor superfamily, member 14	Plasma Membrane	transmembrane receptor	NA	NA
TOR3A	0.323	6	torsin family 3, member A	Cytoplasm	enzyme	NA	NA
GALNT3	0.322	6	UDP-N-acetyl-alpha-D-galactosamine:polypeptide N-acetylgalactosaminyltransferase 3 (GalNAc-T3)	Cytoplasm	enzyme	NA	NA
IQGAP2	0.322	6	IQ motif containing GTPase activating protein 2	Cytoplasm	other	NA	NA
KIF18A	0.322	6	kinesin family member 18A	Cytoplasm	enzyme	NA	NA
C21orf59	0.322	6	chromosome 21 open reading frame 59	Cytoplasm	other	NA	NA
DEK	0.321	6	DEK oncogene	Nucleus	transcription regulator	NA	NA
AIM1	0.321	6	absent in melanoma 1	Extracellular Space	other	Mesenchymal	NA
HJURP	0.321	6	Holliday junction recognition protein	Nucleus	other	NA	NA
RACGAP1	0.321	6	Rac GTPase activating protein 1	Cytoplasm	transporter	NA	NA
KIF14	0.32	6	kinesin family member 14	Cytoplasm	other	NA	NA
MORC4	0.32	6	MORC family CW-type zinc finger 4	unknown	other	NA	NA
SEC61G	0.319	6	Sec61 gamma subunit	Cytoplasm	transporter	NA	NA
CYB561	0.319	6	cytochrome b-561	Cytoplasm	enzyme	NA	NA
SEC22A	0.319	6	SEC22 vesicle trafficking protein homolog A (S. cerevisiae)	Cytoplasm	transporter	NA	NA
ACTL6A	0.318	6	actin-like 6A	Nucleus	other	NA	NA
PAWR	0.318	6	PRKC, apoptosis, WT1, regulator	Nucleus	transcription regulator	NA	NA
CDCA8	0.318	6	cell division cycle associated 8	Nucleus	other	NA	NA
CKS1B	0.317	6	CDC28 protein kinase regulatory subunit 1B	unknown	kinase	NA	NA
F13A1	0.317	6	coagulation factor XIII, A1 polypeptide	Extracellular Space	enzyme	NA	NA
MEIS3P1	0.317	6	Meis homeobox 3 pseudogene 1	unknown	other	NA	NA
TGIF1	0.316	6	TGFB-induced factor homeobox 1	Nucleus	transcription regulator	NA	NA
GOLT1B	0.316	6	golgi transport 1B	Cytoplasm	other	NA	NA
PSMA1	0.316	6	proteasome (prosome, macropain) subunit, alpha type, 1	Cytoplasm	peptidase	NA	NA
OSMR	0.315	6	oncostatin M receptor	Plasma Membrane	transmembrane receptor	NA	NA
RPL39L	0.315	6	ribosomal protein L39-like	unknown	other	NA	NA
CTSB	0.314	6	cathepsin B	Cytoplasm	peptidase	Mesenchymal	NA
MCM3	0.314	6	minichromosome maintenance complex component 3	Nucleus	enzyme	NA	NA
C9orf3	0.314	6	chromosome 9 open reading frame 3	Cytoplasm	peptidase	NA	NA
CTSL1	0.313	6	cathepsin L1	Cytoplasm	peptidase	NA	NA
H2AFV	0.313	6	H2A histone family, member V	Nucleus	other	NA	NA
CD93	0.313	6	CD93 molecule	Plasma Membrane	other	NA	NA
SAP30	0.313	6	Sin3A-associated protein, 30kDa	Nucleus	transcription regulator	NA	NA
MYCBP	0.313	6	c-myc binding protein	Nucleus	transcription regulator	NA	NA
GLRX2	0.313	6	glutaredoxin 2	Cytoplasm	enzyme	NA	NA
PSMD12	0.313	6	proteasome (prosome, macropain) 26S subunit, non-ATPase, 12	Cytoplasm	other	NA	NA
ZWINT	0.312	6	ZW10 interactor	Nucleus	other	NA	NA
ESPL1	0.312	6	extra spindle pole bodies homolog 1 (S. cerevisiae)	Nucleus	peptidase	NA	NA
LAP3	0.312	6	leucine aminopeptidase 3	Cytoplasm	peptidase	NA	NA
GSDMD	0.312	6	gasdermin D	Extracellular Space	other	NA	NA
MGP	0.31	6	matrix Gla protein	Extracellular Space	other	NA	NA
SERPINB8	0.31	6	serpin peptidase inhibitor, clade B (ovalbumin), member 8	Cytoplasm	other	NA	NA
CENPF	0.31	6	centromere protein F, 350/400kDa (mitosin)	Nucleus	other	NA	NA
PION	0.31	6	pigeon homolog (Drosophila)	Cytoplasm	peptidase	NA	NA
DTYMK	0.31	6	deoxythymidylate kinase (thymidylate kinase)	Cytoplasm	kinase	NA	NA
RARRES1	0.309	6	retinoic acid receptor responder (tazarotene induced) 1	Plasma Membrane	other	NA	NA
PLA2G2A	0.308	6	phospholipase A2, group IIA (platelets, synovial fluid)	Extracellular Space	enzyme	NA	NA
MANEA	0.308	6	mannosidase, endo-alpha	Cytoplasm	enzyme	NA	NA
SLBP	0.307	6	stem-loop binding protein	Nucleus	other	NA	NA
S100A6	0.307	6	S100 calcium binding protein A6	Cytoplasm	transporter	NA	NA
ARPC1B	0.306	6	actin related protein 2/3 complex, subunit 1B, 41kDa	Cytoplasm	other	Mesenchymal	NA
DAP3	0.306	6	death associated protein 3	Cytoplasm	other	NA	NA
MBD4	0.305	6	methyl-CpG binding domain protein 4	Nucleus	enzyme	NA	NA
DSE	0.305	6	dermatan sulfate epimerase	Cytoplasm	enzyme	Mesenchymal	NA
RCAN1	0.304	6	regulator of calcineurin 1	Nucleus	transcription regulator	NA	NA
PNPLA4	0.304	6	patatin-like phospholipase domain containing 4	Cytoplasm	enzyme	NA	NA
TBCCD1	0.303	6	TBCC domain containing 1	Cytoplasm	other	NA	NA
DTL	0.303	6	denticleless E3 ubiquitin protein ligase homolog (Drosophila)	Nucleus	other	NA	Proliferative
LSM5	0.303	6	LSM5 homolog, U6 small nuclear RNA associated (S. cerevisiae)	Cytoplasm	other	NA	NA
MDFIC	0.303	6	MyoD family inhibitor domain containing	Nucleus	other	NA	NA
TMEM59	0.303	6	transmembrane protein 59	Plasma Membrane	peptidase	NA	NA
IGF2BP3	0.302	6	insulin-like growth factor 2 mRNA binding protein 3	Cytoplasm	translation regulator	NA	NA
IFI35	0.302	6	interferon-induced protein 35	Nucleus	other	NA	NA
PLA2G4A	0.302	6	phospholipase A2, group IVA (cytosolic, calcium-dependent)	Cytoplasm	enzyme	NA	NA
UBE3C	0.301	6	ubiquitin protein ligase E3C	Nucleus	enzyme	NA	NA
SNX10	0.301	6	sorting nexin 10	Cytoplasm	transporter	NA	NA
RPL26L1	0.301	6	ribosomal protein L26-like 1	Cytoplasm	other	NA	NA
IGFBP7	0.3	6	insulin-like growth factor binding protein 7	Extracellular Space	transporter	NA	NA
NFIL3	0.299	6	nuclear factor, interleukin 3 regulated	Nucleus	transcription regulator	NA	NA
PSPH	0.299	6	phosphoserine phosphatase	Cytoplasm	phosphatase	NA	NA
TXNDC9	0.298	6	thioredoxin domain containing 9	unknown	other	NA	NA
SAT1	0.298	6	spermidine/spermine N1-acetyltransferase 1	Cytoplasm	enzyme	Mesenchymal	NA
TIPARP	0.298	6	TCDD-inducible poly(ADP-ribose) polymerase	Nucleus	other	NA	NA
EN1	0.298	6	engrailed homeobox 1	Nucleus	transcription regulator	NA	NA
ATP10D	0.298	6	ATPase, class V, type 10D	Plasma Membrane	transporter	NA	NA
FBLN1	0.297	6	fibulin 1	Extracellular Space	other	NA	NA
HOXB7	0.297	6	homeobox B7	Nucleus	transcription regulator	NA	NA
UGCG	0.297	6	UDP-glucose ceramide glucosyltransferase	Cytoplasm	enzyme	NA	NA
UNG	0.296	6	uracil-DNA glycosylase	Nucleus	enzyme	NA	NA
EZH2	0.296	6	enhancer of zeste homolog 2 (Drosophila)	Nucleus	transcription regulator	NA	NA
ROR1	0.296	6	receptor tyrosine kinase-like orphan receptor 1	Plasma Membrane	kinase	NA	NA
HSPA4L	0.294	6	heat shock 70kDa protein 4-like	Cytoplasm	other	NA	NA
CLIC4	0.293	6	chloride intracellular channel 4	Plasma Membrane	ion channel	NA	NA
FANCI	0.293	6	Fanconi anemia, complementation group I	Nucleus	other	NA	NA
TXNRD1	0.292	6	thioredoxin reductase 1	Cytoplasm	enzyme	NA	NA
MMADHC	0.292	6	methylmalonic aciduria (cobalamin deficiency) cblD type, with homocystinuria	Cytoplasm	other	NA	NA
TMBIM4	0.292	6	transmembrane BAX inhibitor motif containing 4	Nucleus	other	NA	NA
ARG2	0.292	6	arginase, type II	Cytoplasm	enzyme	NA	NA
C4orf27	0.292	6	chromosome 4 open reading frame 27	Nucleus	other	NA	NA
HOXB2	0.291	6	homeobox B2	Nucleus	transcription regulator	NA	NA
PSMC3IP	0.291	6	PSMC3 interacting protein	Nucleus	transcription regulator	NA	NA
NEK11	0.291	6	NIMA (never in mitosis gene a)- related kinase 11	Nucleus	kinase	NA	NA
CBR3	0.29	6	carbonyl reductase 3	Cytoplasm	enzyme	NA	NA
PSMB8	0.289	6	proteasome (prosome, macropain) subunit, beta type, 8 (large multifunctional peptidase 7)	Cytoplasm	peptidase	NA	NA
SEC31A	0.289	6	SEC31 homolog A (S. cerevisiae)	Cytoplasm	other	NA	NA
TRNAU1AP	0.289	6	tRNA selenocysteine 1 associated protein 1	Nucleus	other	NA	NA
DNAJB6	0.288	6	DnaJ (Hsp40) homolog, subfamily B, member 6	Nucleus	transcription regulator	NA	NA
ACP1	0.288	6	acid phosphatase 1, soluble	Cytoplasm	phosphatase	NA	NA
OIP5	0.287	6	Opa interacting protein 5	Nucleus	other	NA	NA
NUCB2	0.286	6	nucleobindin 2	Nucleus	other	NA	NA
UBE2D3	0.286	6	ubiquitin-conjugating enzyme E2D 3	unknown	enzyme	NA	NA
CD44	0.285	6	CD44 molecule (Indian blood group)	Plasma Membrane	enzyme	NA	NA
GOSR2	0.285	6	golgi SNAP receptor complex member 2	Cytoplasm	transporter	NA	NA
CARHSP1	0.285	6	calcium regulated heat stable protein 1, 24kDa	Cytoplasm	other	NA	NA
CALML4	0.285	6	calmodulin-like 4	unknown	other	NA	NA
PSENEN	0.284	6	presenilin enhancer 2 homolog (C. elegans)	Cytoplasm	peptidase	NA	NA
APOBEC3B	0.284	6	apolipoprotein B mRNA editing enzyme, catalytic polypeptide-like 3B	Cytoplasm	enzyme	NA	NA
PNO1	0.283	6	partner of NOB1 homolog (S. cerevisiae)	Nucleus	other	NA	NA
TDO2	0.283	6	tryptophan 2,3-dioxygenase	Cytoplasm	enzyme	NA	NA
UBE2C	0.282	6	ubiquitin-conjugating enzyme E2C	Cytoplasm	enzyme	NA	NA
SDC2	0.282	6	syndecan 2	Plasma Membrane	other	NA	NA
PROM1	0.281	6	prominin 1	Plasma Membrane	other	NA	NA
NR2F2	0.281	6	nuclear receptor subfamily 2, group F, member 2	Nucleus	ligand-dependent nuclear receptor	NA	NA
GDPD2	0.281	6	glycerophosphodiester phosphodiesterase domain containing 2	Plasma Membrane	enzyme	NA	NA
HOXA10	0.281	6	homeobox A10	Nucleus	transcription regulator	NA	NA
SLPI	0.28	6	secretory leukocyte peptidase inhibitor	Cytoplasm	other	NA	NA
IL7	0.28	6	interleukin 7	Extracellular Space	cytokine	NA	NA
OPN3	0.28	6	opsin 3	Plasma Membrane	G-protein coupled receptor	NA	NA
TMED5	0.28	6	transmembrane emp24 protein transport domain containing 5	Cytoplasm	other	NA	NA
RNASEH2A	0.279	6	ribonuclease H2, subunit A	Nucleus	enzyme	NA	NA
ELK3	0.279	6	ELK3, ETS-domain protein (SRF accessory protein 2)	Nucleus	transcription regulator	NA	NA
YAP1	0.279	6	Yes-associated protein 1	Nucleus	transcription regulator	Mesenchymal	NA
TMEM165	0.279	6	transmembrane protein 165	Plasma Membrane	other	NA	NA
IFIH1	0.278	6	interferon induced with helicase C domain 1	Nucleus	enzyme	NA	NA
CCDC53	0.277	6	coiled-coil domain containing 53	Cytoplasm	other	NA	NA
TANK	0.277	6	TRAF family member-associated NFKB activator	Cytoplasm	other	NA	NA
MPC2	0.276	6	mitochondrial pyruvate carrier 2	Plasma Membrane	other	NA	NA
PSMA2	0.276	6	proteasome (prosome, macropain) subunit, alpha type, 2	Cytoplasm	peptidase	NA	NA
S100A9	0.275	6	S100 calcium binding protein A9	Cytoplasm	other	NA	NA
TMEM5	0.275	6	transmembrane protein 5	Plasma Membrane	other	NA	NA
NUP98	0.273	6	nucleoporin 98kDa	Nucleus	transporter	NA	NA
CTSS	0.272	6	cathepsin S	Cytoplasm	peptidase	NA	NA
ACADL	0.272	6	acyl-CoA dehydrogenase, long chain	Cytoplasm	enzyme	NA	NA
SSX2IP	0.272	6	synovial sarcoma, X breakpoint 2 interacting protein	Plasma Membrane	other	NA	NA
HUS1	0.272	6	HUS1 checkpoint homolog (S. pombe)	Nucleus	kinase	NA	NA
S100A8	0.271	6	S100 calcium binding protein A8	Cytoplasm	other	NA	NA
CDO1	0.271	6	cysteine dioxygenase, type I	Cytoplasm	enzyme	NA	NA
AK2	0.271	6	adenylate kinase 2	Cytoplasm	kinase	NA	NA
RNF14	0.268	6	ring finger protein 14	unknown	transcription regulator	NA	NA
HDAC1	0.264	6	histone deacetylase 1	Nucleus	transcription regulator	NA	NA
PLGRKT	0.263	6	plasminogen receptor, C-terminal lysine transmembrane protein	Cytoplasm	other	NA	NA
SCP2	0.257	6	sterol carrier protein 2	Cytoplasm	transporter	NA	NA
ATP6AP2	0.255	6	ATPase, H+ transporting, lysosomal accessory protein 2	Cytoplasm	transporter	NA	NA
EMC1	0.255	6	ER membrane protein complex subunit 1	Plasma Membrane	other	NA	NA
TMEM70	0.253	6	transmembrane protein 70	Cytoplasm	other	NA	NA
DEGS1	0.245	6	delta(4)-desaturase, sphingolipid 1	Plasma Membrane	enzyme	NA	NA
AOX1	0.243	6	aldehyde oxidase 1	Cytoplasm	enzyme	NA	NA
APOO	0.231	6	apolipoprotein O	Extracellular Space	other	NA	NA
TNFSF10	0.218	6	tumor necrosis factor (ligand) superfamily, member 10	Extracellular Space	cytokine	NA	NA
RHEB	0.217	6	Ras homolog enriched in brain	Cytoplasm	enzyme	NA	NA
NBEA	-0.237	6	neurobeachin	Cytoplasm	other	NA	NA
CORO7/CORO7-PAM16	-0.243	6	coronin 7	Cytoplasm	other	NA	NA
SHANK2	-0.25	6	SH3 and multiple ankyrin repeat domains 2	Plasma Membrane	other	NA	NA
TANC2	-0.25	6	tetratricopeptide repeat, ankyrin repeat and coiled-coil containing 2	Nucleus	transcription regulator	NA	NA
WNK1	-0.252	6	WNK lysine deficient protein kinase 1	Cytoplasm	kinase	NA	NA
SDR39U1	-0.254	6	short chain dehydrogenase/reductase family 39U, member 1	unknown	other	NA	NA
N4BP2L2	-0.255	6	NEDD4 binding protein 2-like 2	Nucleus	other	NA	NA
TACC1	-0.257	6	transforming, acidic coiled-coil containing protein 1	Nucleus	other	NA	NA
GOLGA8A/GOLGA8B	-0.258	6	golgin A8 family, member B	Cytoplasm	other	NA	NA
CX3CL1	-0.263	6	chemokine (C-X3-C motif) ligand 1	Extracellular Space	cytokine	NA	NA
IGSF9B	-0.264	6	immunoglobulin superfamily, member 9B	unknown	other	NA	NA
PTPRD	-0.264	6	protein tyrosine phosphatase, receptor type, D	Plasma Membrane	phosphatase	NA	NA
GRIA3	-0.265	6	glutamate receptor, ionotropic, AMPA 3	Plasma Membrane	ion channel	NA	NA
CAMK1D	-0.268	6	calcium/calmodulin-dependent protein kinase ID	Cytoplasm	kinase	NA	NA
UBOX5	-0.269	6	U-box domain containing 5	Nucleus	enzyme	NA	NA
DEPDC5	-0.269	6	DEP domain containing 5	unknown	other	NA	NA
TOX4	-0.271	6	TOX high mobility group box family member 4	Nucleus	other	NA	NA
KIAA0226	-0.273	6	KIAA0226	Cytoplasm	other	NA	NA
FXR2	-0.273	6	fragile X mental retardation, autosomal homolog 2	Cytoplasm	other	NA	NA
CSPG5	-0.274	6	chondroitin sulfate proteoglycan 5 (neuroglycan C)	Extracellular Space	growth factor	Proneural	NA
GNAS	-0.276	6	GNAS complex locus	Plasma Membrane	enzyme	Classical	NA
PTPN11	-0.278	6	protein tyrosine phosphatase, non-receptor type 11	Cytoplasm	phosphatase	NA	NA
HPS4	-0.28	6	Hermansky-Pudlak syndrome 4	Cytoplasm	other	NA	NA
ATRN	-0.281	6	attractin	Extracellular Space	other	NA	NA
TNKS	-0.282	6	tankyrase, TRF1-interacting ankyrin-related ADP-ribose polymerase	Nucleus	enzyme	NA	NA
RGS12	-0.282	6	regulator of G-protein signaling 12	Nucleus	other	Classical	NA
QKI	-0.282	6	QKI, KH domain containing, RNA binding	Nucleus	other	NA	NA
PHF15	-0.283	6	PHD finger protein 15	Nucleus	other	NA	NA
SLC23A2	-0.285	6	solute carrier family 23 (nucleobase transporters), member 2	Plasma Membrane	transporter	NA	NA
CHD9	-0.285	6	chromodomain helicase DNA binding protein 9	Cytoplasm	other	NA	NA
NLGN3	-0.285	6	neuroligin 3	Plasma Membrane	enzyme	Proneural	NA
EPS15L1	-0.286	6	epidermal growth factor receptor pathway substrate 15-like 1	Plasma Membrane	other	NA	NA
C1QL1	-0.286	6	complement component 1, q subcomponent-like 1	Extracellular Space	other	Proneural	NA
TMEM151B	-0.286	6	transmembrane protein 151B	unknown	other	NA	NA
CACNA1A	-0.286	6	calcium channel, voltage-dependent, P/Q type, alpha 1A subunit	Plasma Membrane	ion channel	NA	NA
ATP1A3	-0.288	6	ATPase, Na+/K+ transporting, alpha 3 polypeptide	Plasma Membrane	transporter	Proneural	NA
SREBF2	-0.288	6	sterol regulatory element binding transcription factor 2	Nucleus	transcription regulator	NA	NA
PPP1R26	-0.289	6	protein phosphatase 1, regulatory subunit 26	Nucleus	other	NA	NA
PHLDB1	-0.289	6	pleckstrin homology-like domain, family B, member 1	Cytoplasm	other	NA	NA
C8orf44	-0.289	6	chromosome 8 open reading frame 44	unknown	other	NA	NA
RALGDS	-0.289	6	ral guanine nucleotide dissociation stimulator	Cytoplasm	other	NA	NA
PKNOX2	-0.289	6	PBX/knotted 1 homeobox 2	Nucleus	other	NA	NA
EIF3A	-0.29	6	eukaryotic translation initiation factor 3, subunit A	Cytoplasm	translation regulator	NA	NA
PTPRT	-0.29	6	protein tyrosine phosphatase, receptor type, T	Plasma Membrane	phosphatase	NA	NA
KIAA0430	-0.291	6	KIAA0430	unknown	other	NA	NA
POLDIP3	-0.291	6	polymerase (DNA-directed), delta interacting protein 3	Nucleus	other	NA	NA
FSD1	-0.293	6	fibronectin type III and SPRY domain containing 1	Cytoplasm	other	NA	NA
MCF2L	-0.293	6	MCF.2 cell line derived transforming sequence-like	Cytoplasm	other	NA	NA
ANGPTL2	-0.293	6	angiopoietin-like 2	Extracellular Space	other	NA	NA
SPAG9	-0.294	6	sperm associated antigen 9	Plasma Membrane	other	NA	NA
SORBS1	-0.294	6	sorbin and SH3 domain containing 1	Plasma Membrane	other	NA	NA
TRIM62	-0.294	6	tripartite motif containing 62	unknown	other	NA	NA
PPP2R5C	-0.295	6	protein phosphatase 2, regulatory subunit B', gamma	Nucleus	other	NA	NA
TMEM246	-0.295	6	transmembrane protein 246	unknown	other	NA	NA
EEF1D	-0.296	6	eukaryotic translation elongation factor 1 delta (guanine nucleotide exchange protein)	Cytoplasm	translation regulator	NA	NA
ADRBK2	-0.296	6	adrenergic, beta, receptor kinase 2	Cytoplasm	kinase	NA	NA
PCSK6	-0.297	6	proprotein convertase subtilisin/kexin type 6	Extracellular Space	peptidase	NA	NA
GABRD	-0.297	6	gamma-aminobutyric acid (GABA) A receptor, delta	Plasma Membrane	ion channel	NA	NA
POU6F1	-0.297	6	POU class 6 homeobox 1	Nucleus	transcription regulator	NA	NA
AKAP7	-0.298	6	A kinase (PRKA) anchor protein 7	Plasma Membrane	other	NA	NA
SPON1	-0.298	6	spondin 1, extracellular matrix protein	Extracellular Space	other	NA	NA
TRAK1	-0.298	6	trafficking protein, kinesin binding 1	Nucleus	other	NA	NA
MAPK8IP3	-0.298	6	mitogen-activated protein kinase 8 interacting protein 3	Cytoplasm	other	NA	NA
TBC1D17	-0.298	6	TBC1 domain family, member 17	unknown	other	NA	NA
RPS28	-0.299	6	ribosomal protein S28	Cytoplasm	other	NA	NA
MYT1	-0.299	6	myelin transcription factor 1	Nucleus	transcription regulator	Proneural	NA
PCBP4	-0.299	6	poly(rC) binding protein 4	Nucleus	other	NA	NA
ABCB1	-0.3	6	ATP-binding cassette, sub-family B (MDR/TAP), member 1	Plasma Membrane	transporter	NA	NA
MAST1	-0.3	6	microtubule associated serine/threonine kinase 1	Cytoplasm	kinase	Proneural	NA
HERC1	-0.3	6	HECT and RLD domain containing E3 ubiquitin protein ligase family member 1	Cytoplasm	other	NA	NA
C2orf72	-0.3	6	chromosome 2 open reading frame 72	unknown	other	NA	NA
ZNF358	-0.301	6	zinc finger protein 358	Nucleus	other	NA	NA
FAM178A	-0.301	6	family with sequence similarity 178, member A	unknown	other	NA	NA
EPN2	-0.302	6	epsin 2	Cytoplasm	other	NA	NA
ATP6V0A1	-0.302	6	ATPase, H+ transporting, lysosomal V0 subunit a1	Cytoplasm	transporter	NA	NA
PEX5	-0.303	6	peroxisomal biogenesis factor 5	Cytoplasm	transmembrane receptor	NA	NA
MLL	-0.303	6	myeloid/lymphoid or mixed-lineage leukemia (trithorax homolog, Drosophila)	Nucleus	transcription regulator	NA	NA
CALM1 (includes others)	-0.304	6	calmodulin 1 (phosphorylase kinase, delta)	unknown	other	NA	NA
SOS2	-0.304	6	son of sevenless homolog 2 (Drosophila)	Cytoplasm	other	NA	NA
ECSIT	-0.304	6	ECSIT homolog (Drosophila)	Nucleus	transcription regulator	NA	NA
TBC1D12	-0.304	6	TBC1 domain family, member 12	Extracellular Space	other	NA	NA
ASIC4	-0.304	6	acid-sensing (proton-gated) ion channel family member 4	Plasma Membrane	ion channel	NA	NA
SYNGR1	-0.304	6	synaptogyrin 1	Plasma Membrane	transporter	NA	NA
HECW1	-0.305	6	HECT, C2 and WW domain containing E3 ubiquitin protein ligase 1	Cytoplasm	enzyme	NA	NA
TACC2	-0.306	6	transforming, acidic coiled-coil containing protein 2	Nucleus	other	NA	NA
ATP10A	-0.306	6	ATPase, class V, type 10A	Plasma Membrane	transporter	NA	NA
EIF3H	-0.307	6	eukaryotic translation initiation factor 3, subunit H	Cytoplasm	translation regulator	NA	NA
INA	-0.307	6	internexin neuronal intermediate filament protein, alpha	Cytoplasm	other	NA	NA
ADCY2	-0.307	6	adenylate cyclase 2 (brain)	Plasma Membrane	enzyme	NA	NA
SEMA6B	-0.307	6	sema domain, transmembrane domain (TM), and cytoplasmic domain, (semaphorin) 6B	Plasma Membrane	other	NA	NA
NUMA1	-0.307	6	nuclear mitotic apparatus protein 1	Nucleus	other	NA	NA
DGCR2	-0.307	6	DiGeorge syndrome critical region gene 2	Plasma Membrane	other	NA	NA
ABAT	-0.308	6	4-aminobutyrate aminotransferase	Cytoplasm	enzyme	Proneural	NA
PPP6R2	-0.308	6	protein phosphatase 6, regulatory subunit 2	Cytoplasm	other	NA	NA
LRRC1	-0.309	6	leucine rich repeat containing 1	Cytoplasm	other	NA	NA
CBX6	-0.309	6	chromobox homolog 6	Nucleus	other	NA	NA
GTPBP1	-0.309	6	GTP binding protein 1	Cytoplasm	enzyme	NA	NA
PTPRB	-0.31	6	protein tyrosine phosphatase, receptor type, B	Plasma Membrane	phosphatase	NA	NA
RGS5	-0.31	6	regulator of G-protein signaling 5	Plasma Membrane	other	NA	NA
DST	-0.311	6	dystonin	Plasma Membrane	other	NA	NA
SIRT2	-0.311	6	sirtuin 2	Nucleus	transcription regulator	NA	NA
CTCF	-0.312	6	CCCTC-binding factor (zinc finger protein)	Nucleus	transcription regulator	NA	NA
RXRB	-0.312	6	retinoid X receptor, beta	Nucleus	ligand-dependent nuclear receptor	NA	NA
RANBP17	-0.312	6	RAN binding protein 17	Nucleus	transporter	NA	NA
R3HDM2	-0.313	6	R3H domain containing 2	Nucleus	other	NA	NA
ERBB4	-0.313	6	v-erb-a erythroblastic leukemia viral oncogene homolog 4 (avian)	Plasma Membrane	kinase	NA	NA
PARD3	-0.313	6	par-3 partitioning defective 3 homolog (C. elegans)	Plasma Membrane	other	NA	NA
TUBGCP4	-0.313	6	tubulin, gamma complex associated protein 4	Cytoplasm	other	NA	NA
LRP1B	-0.313	6	low density lipoprotein receptor-related protein 1B	Plasma Membrane	transmembrane receptor	NA	NA
COX4I1	-0.314	6	cytochrome c oxidase subunit IV isoform 1	Cytoplasm	enzyme	NA	NA
WBP4	-0.314	6	WW domain binding protein 4 (formin binding protein 21)	Cytoplasm	other	NA	NA
CBS	-0.314	6	cystathionine-beta-synthase	Cytoplasm	enzyme	NA	NA
MTSS1L	-0.314	6	metastasis suppressor 1-like	unknown	other	NA	NA
WDR59	-0.314	6	WD repeat domain 59	unknown	transporter	NA	NA
APC2	-0.314	6	adenomatosis polyposis coli 2	Cytoplasm	other	NA	NA
KHDRBS2	-0.315	6	KH domain containing, RNA binding, signal transduction associated 2	Nucleus	other	NA	NA
SLC1A1	-0.316	6	solute carrier family 1 (neuronal/epithelial high affinity glutamate transporter, system Xag), member 1	Plasma Membrane	transporter	Proneural	NA
P2RY14	-0.316	6	purinergic receptor P2Y, G-protein coupled, 14	Plasma Membrane	G-protein coupled receptor	NA	NA
YTHDC1	-0.316	6	YTH domain containing 1	Cytoplasm	other	NA	NA
MMS19	-0.316	6	MMS19 nucleotide excision repair homolog (S. cerevisiae)	Nucleus	transcription regulator	NA	NA
VAMP2	-0.317	6	vesicle-associated membrane protein 2 (synaptobrevin 2)	Plasma Membrane	other	NA	NA
MAP1A	-0.317	6	microtubule-associated protein 1A	Cytoplasm	other	NA	NA
GRIA1	-0.317	6	glutamate receptor, ionotropic, AMPA 1	Plasma Membrane	ion channel	NA	NA
MAPK8IP2	-0.317	6	mitogen-activated protein kinase 8 interacting protein 2	Cytoplasm	other	NA	NA
YLPM1	-0.317	6	YLP motif containing 1	Nucleus	other	NA	NA
KCND2	-0.318	6	potassium voltage-gated channel, Shal-related subfamily, member 2	Plasma Membrane	ion channel	NA	NA
SETD3	-0.318	6	SET domain containing 3	Nucleus	enzyme	NA	NA
SPSB3	-0.318	6	splA/ryanodine receptor domain and SOCS box containing 3	unknown	other	NA	NA
SART1	-0.319	6	squamous cell carcinoma antigen recognized by T cells	Nucleus	other	NA	NA
CRTC1	-0.319	6	CREB regulated transcription coactivator 1	Nucleus	transcription regulator	NA	NA
ASCL1	-0.32	6	achaete-scute complex homolog 1 (Drosophila)	Nucleus	transcription regulator	Proneural	NA
TNKS2	-0.321	6	tankyrase, TRF1-interacting ankyrin-related ADP-ribose polymerase 2	Nucleus	enzyme	NA	NA
MTMR9	-0.322	6	myotubularin related protein 9	Cytoplasm	phosphatase	NA	NA
NCOA1	-0.322	6	nuclear receptor coactivator 1	Nucleus	transcription regulator	NA	NA
ZEB1	-0.322	6	zinc finger E-box binding homeobox 1	Nucleus	transcription regulator	NA	NA
TMEM121	-0.322	6	transmembrane protein 121	unknown	other	NA	NA
FRAT2	-0.322	6	frequently rearranged in advanced T-cell lymphomas 2	Cytoplasm	other	NA	NA
ATP2B2	-0.323	6	ATPase, Ca++ transporting, plasma membrane 2	Plasma Membrane	transporter	NA	NA
H3F3A/H3F3B	-0.324	6	H3 histone, family 3B (H3.3B)	Nucleus	other	NA	NA
VIPAS39	-0.324	6	VPS33B interacting protein, apical-basolateral polarity regulator, spe-39 homolog	Plasma Membrane	other	NA	NA
CASKIN2	-0.324	6	CASK interacting protein 2	Cytoplasm	other	NA	NA
MADD	-0.326	6	MAP-kinase activating death domain	Cytoplasm	other	NA	NA
CHGB	-0.327	6	chromogranin B (secretogranin 1)	Extracellular Space	other	NA	NA
ZNF24	-0.328	6	zinc finger protein 24	Nucleus	transcription regulator	NA	NA
CTIF	-0.329	6	CBP80/20-dependent translation initiation factor	Cytoplasm	other	NA	NA
SATB1	-0.33	6	SATB homeobox 1	Nucleus	transcription regulator	Proneural	NA
PIP4K2B	-0.33	6	phosphatidylinositol-5-phosphate 4-kinase, type II, beta	Cytoplasm	kinase	NA	NA
GLT25D2	-0.331	6	glycosyltransferase 25 domain containing 2	unknown	other	NA	NA
DYNC1H1	-0.331	6	dynein, cytoplasmic 1, heavy chain 1	Cytoplasm	peptidase	NA	NA
PPT2	-0.331	6	palmitoyl-protein thioesterase 2	Cytoplasm	enzyme	NA	NA
TCF12	-0.332	6	transcription factor 12	Nucleus	transcription regulator	NA	NA
TTYH1	-0.334	6	tweety homolog 1 (Drosophila)	Plasma Membrane	ion channel	Proneural	NA
KCNJ10	-0.335	6	potassium inwardly-rectifying channel, subfamily J, member 10	Plasma Membrane	ion channel	NA	NA
PITPNB	-0.336	6	phosphatidylinositol transfer protein, beta	Cytoplasm	transporter	NA	NA
KIF1B	-0.336	6	kinesin family member 1B	Cytoplasm	transporter	NA	NA
GDAP1L1	-0.336	6	ganglioside induced differentiation associated protein 1-like 1	unknown	other	NA	NA
CXXC4	-0.338	6	CXXC finger protein 4	Cytoplasm	other	Proneural	NA
CTSF	-0.339	6	cathepsin F	Cytoplasm	peptidase	NA	NA
RTN3	-0.339	6	reticulon 3	Cytoplasm	other	NA	NA
PLCB1	-0.341	6	phospholipase C, beta 1 (phosphoinositide-specific)	Cytoplasm	enzyme	NA	NA
FAM110B	-0.341	6	family with sequence similarity 110, member B	Cytoplasm	other	Proneural	NA
TSC1	-0.342	6	tuberous sclerosis 1	Cytoplasm	other	NA	NA
TMCC2	-0.343	6	transmembrane and coiled-coil domain family 2	Extracellular Space	other	NA	NA
HIPK2	-0.343	6	homeodomain interacting protein kinase 2	Nucleus	kinase	NA	NA
SGSM2	-0.344	6	small G protein signaling modulator 2	unknown	other	NA	NA
INPP1	-0.345	6	inositol polyphosphate-1-phosphatase	Cytoplasm	phosphatase	NA	NA
WDFY3	-0.346	6	WD repeat and FYVE domain containing 3	Cytoplasm	enzyme	NA	NA
TTLL12	-0.346	6	tubulin tyrosine ligase-like family, member 12	unknown	other	NA	NA
ALDOC	-0.347	6	aldolase C, fructose-bisphosphate	Cytoplasm	enzyme	NA	NA
FAM171A1	-0.347	6	family with sequence similarity 171, member A1	unknown	other	NA	NA
ARHGEF17	-0.347	6	Rho guanine nucleotide exchange factor (GEF) 17	Cytoplasm	other	NA	NA
DIP2C	-0.348	6	DIP2 disco-interacting protein 2 homolog C (Drosophila)	unknown	other	NA	NA
PDE8B	-0.348	6	phosphodiesterase 8B	Cytoplasm	enzyme	NA	NA
WDR37	-0.349	6	WD repeat domain 37	unknown	other	NA	NA
PPP2R5A	-0.352	6	protein phosphatase 2, regulatory subunit B', alpha	Cytoplasm	phosphatase	Neural	NA
SLITRK5	-0.352	6	SLIT and NTRK-like family, member 5	unknown	other	NA	NA
RPL22	-0.353	6	ribosomal protein L22	Nucleus	other	NA	NA
RGS11	-0.354	6	regulator of G-protein signaling 11	Plasma Membrane	enzyme	NA	NA
OMG	-0.355	6	oligodendrocyte myelin glycoprotein	Plasma Membrane	G-protein coupled receptor	NA	NA
EIF4B	-0.356	6	eukaryotic translation initiation factor 4B	Cytoplasm	translation regulator	NA	NA
ZNF34	-0.356	6	zinc finger protein 34	Nucleus	other	NA	NA
DSCAM	-0.356	6	Down syndrome cell adhesion molecule	Plasma Membrane	other	NA	NA
ZMIZ1	-0.356	6	zinc finger, MIZ-type containing 1	Nucleus	other	NA	NA
MGAT3	-0.357	6	mannosyl (beta-1,4-)-glycoprotein beta-1,4-N-acetylglucosaminyltransferase	Cytoplasm	enzyme	NA	NA
TAOK3	-0.36	6	TAO kinase 3	Cytoplasm	kinase	NA	NA
TSC22D1	-0.361	6	TSC22 domain family, member 1	Nucleus	transcription regulator	NA	NA
WAC	-0.363	6	WW domain containing adaptor with coiled-coil	Nucleus	other	NA	NA
PEA15	-0.364	6	phosphoprotein enriched in astrocytes 15	Cytoplasm	transporter	NA	NA
PURA	-0.364	6	purine-rich element binding protein A	Nucleus	transcription regulator	NA	NA
CRYL1	-0.367	6	crystallin, lambda 1	Cytoplasm	enzyme	Neural	NA
THRA	-0.37	6	thyroid hormone receptor, alpha	Nucleus	ligand-dependent nuclear receptor	NA	NA
TSPAN7	-0.37	6	tetraspanin 7	Plasma Membrane	other	NA	NA
ACVR2B	-0.371	6	activin A receptor, type IIB	Plasma Membrane	kinase	NA	NA
ARL3	-0.372	6	ADP-ribosylation factor-like 3	Cytoplasm	enzyme	NA	NA
TERF2	-0.374	6	telomeric repeat binding factor 2	Nucleus	other	NA	NA
FCHSD2	-0.377	6	FCH and double SH3 domains 2	unknown	other	NA	NA
JMJD1C	-0.381	6	jumonji domain containing 1C	Nucleus	other	NA	NA
ASB13	-0.382	6	ankyrin repeat and SOCS box containing 13	unknown	other	NA	NA
ADIPOR2	-0.384	6	adiponectin receptor 2	Plasma Membrane	other	NA	NA
GPRC5B	-0.39	6	G protein-coupled receptor, family C, group 5, member B	Plasma Membrane	G-protein coupled receptor	NA	NA
ABCC8	-0.393	6	ATP-binding cassette, sub-family C (CFTR/MRP), member 8	Plasma Membrane	transporter	NA	NA
RGCC	-0.393	6	regulator of cell cycle	Cytoplasm	other	NA	NA
ATP6V1G2	-0.394	6	ATPase, H+ transporting, lysosomal 13kDa, V1 subunit G2	Cytoplasm	transporter	NA	Proneural
TRIM8	-0.394	6	tripartite motif containing 8	Nucleus	other	NA	NA
FRAT1	-0.395	6	frequently rearranged in advanced T-cell lymphomas	Cytoplasm	other	NA	NA
SCG3	-0.396	6	secretogranin III	Extracellular Space	other	Proneural	Proneural
FAM168A	-0.407	6	family with sequence similarity 168, member A	unknown	other	NA	NA
MICU1	-0.416	6	mitochondrial calcium uptake 1	Cytoplasm	other	NA	NA
GLUD2	-0.429	6	glutamate dehydrogenase 2	Cytoplasm	enzyme	NA	NA
RPL15	-0.434	6	ribosomal protein L15	Cytoplasm	other	NA	NA
PSRC1	0.428	5	proline/serine-rich coiled-coil 1	Cytoplasm	other	NA	NA
SERPING1	0.427	5	serpin peptidase inhibitor, clade G (C1 inhibitor), member 1	Extracellular Space	other	NA	NA
HK2	0.417	5	hexokinase 2	Cytoplasm	kinase	NA	NA
SERPINH1	0.414	5	serpin peptidase inhibitor, clade H (heat shock protein 47), member 1, (collagen binding protein 1)	Extracellular Space	other	NA	NA
SMS	0.411	5	spermine synthase	Cytoplasm	enzyme	NA	NA
TMBIM1	0.411	5	transmembrane BAX inhibitor motif containing 1	Cytoplasm	other	Mesenchymal	NA
GPNMB	0.407	5	glycoprotein (transmembrane) nmb	Plasma Membrane	enzyme	NA	NA
PIGT	0.406	5	phosphatidylinositol glycan anchor biosynthesis, class T	Cytoplasm	enzyme	NA	NA
PTX3	0.4	5	pentraxin 3, long	Extracellular Space	other	NA	NA
FKBP9	0.4	5	FK506 binding protein 9, 63 kDa	Cytoplasm	enzyme	NA	NA
FMOD	0.395	5	fibromodulin	Extracellular Space	other	NA	NA
SERPINE1	0.393	5	serpin peptidase inhibitor, clade E (nexin, plasminogen activator inhibitor type 1), member 1	Extracellular Space	other	Mesenchymal	Mesenchymal
IFI30	0.392	5	interferon, gamma-inducible protein 30	Cytoplasm	enzyme	Mesenchymal	NA
IGFBP3	0.392	5	insulin-like growth factor binding protein 3	Extracellular Space	other	NA	NA
FLNC	0.389	5	filamin C, gamma	Cytoplasm	other	NA	NA
MYL12A	0.388	5	myosin, light chain 12A, regulatory, non-sarcomeric	Cytoplasm	other	NA	NA
LAMC1	0.386	5	laminin, gamma 1 (formerly LAMB2)	Extracellular Space	other	NA	NA
PCOLCE	0.385	5	procollagen C-endopeptidase enhancer	Extracellular Space	other	NA	NA
COL4A1	0.385	5	collagen, type IV, alpha 1	Extracellular Space	other	NA	Mesenchymal
S100A11	0.384	5	S100 calcium binding protein A11	Cytoplasm	other	Mesenchymal	NA
FTSJ2	0.384	5	FtsJ RNA methyltransferase homolog 2 (E. coli)	Nucleus	enzyme	NA	NA
DPY19L1	0.383	5	dpy-19-like 1 (C. elegans)	unknown	other	NA	NA
RAI14	0.382	5	retinoic acid induced 14	Nucleus	transcription regulator	NA	NA
BHLHE40	0.381	5	basic helix-loop-helix family, member e40	Nucleus	transcription regulator	NA	NA
YKT6	0.381	5	YKT6 v-SNARE homolog (S. cerevisiae)	Cytoplasm	enzyme	NA	NA
XRCC5	0.381	5	X-ray repair complementing defective repair in Chinese hamster cells 5 (double-strand-break rejoining)	Nucleus	enzyme	NA	NA
SERPINA1	0.38	5	serpin peptidase inhibitor, clade A (alpha-1 antiproteinase, antitrypsin), member 1	Extracellular Space	other	Mesenchymal	NA
RFC4	0.379	5	replication factor C (activator 1) 4, 37kDa	Nucleus	other	NA	NA
DAP	0.378	5	death-associated protein	Cytoplasm	transcription regulator	NA	NA
MAOB	0.377	5	monoamine oxidase B	Cytoplasm	enzyme	NA	NA
TREM1	0.376	5	triggering receptor expressed on myeloid cells 1	Plasma Membrane	other	NA	NA
SMYD2	0.375	5	SET and MYND domain containing 2	Cytoplasm	enzyme	NA	NA
FCGR2B	0.374	5	Fc fragment of IgG, low affinity IIb, receptor (CD32)	Plasma Membrane	transmembrane receptor	Mesenchymal	NA
EXOSC9	0.373	5	exosome component 9	Nucleus	enzyme	NA	NA
TUBB6	0.373	5	tubulin, beta 6 class V	Cytoplasm	other	NA	NA
MAP2K3	0.372	5	mitogen-activated protein kinase kinase 3	Cytoplasm	kinase	NA	NA
LAMB1	0.371	5	laminin, beta 1	Extracellular Space	other	Mesenchymal	NA
COL6A3	0.369	5	collagen, type VI, alpha 3	Extracellular Space	other	NA	NA
SEPHS2	0.369	5	selenophosphate synthetase 2	unknown	enzyme	NA	NA
RFC2	0.368	5	replication factor C (activator 1) 2, 40kDa	Nucleus	other	NA	NA
C1S	0.368	5	complement component 1, s subcomponent	Extracellular Space	peptidase	NA	NA
TNC	0.367	5	tenascin C	Extracellular Space	other	NA	NA
NIT2	0.367	5	nitrilase family, member 2	Cytoplasm	enzyme	NA	NA
AP3S1	0.367	5	adaptor-related protein complex 3, sigma 1 subunit	Cytoplasm	transporter	NA	NA
PTMA	0.366	5	prothymosin, alpha	Nucleus	other	NA	NA
TNFAIP6	0.366	5	tumor necrosis factor, alpha-induced protein 6	Extracellular Space	other	NA	NA
HLCS	0.366	5	holocarboxylase synthetase (biotin-(proprionyl-CoA-carboxylase (ATP-hydrolysing)) ligase)	Cytoplasm	enzyme	NA	NA
TMEM48	0.366	5	transmembrane protein 48	Nucleus	other	NA	NA
ECHDC2	0.364	5	enoyl CoA hydratase domain containing 2	unknown	other	NA	NA
PROCR	0.364	5	protein C receptor, endothelial	Plasma Membrane	other	Mesenchymal	NA
POLD3	0.364	5	polymerase (DNA-directed), delta 3, accessory subunit	Nucleus	transcription regulator	NA	NA
FZD6	0.364	5	frizzled family receptor 6	Plasma Membrane	G-protein coupled receptor	NA	NA
C10orf10	0.363	5	chromosome 10 open reading frame 10	Cytoplasm	other	NA	NA
NQO1	0.362	5	NAD(P)H dehydrogenase, quinone 1	Cytoplasm	enzyme	NA	NA
PDK1	0.362	5	pyruvate dehydrogenase kinase, isozyme 1	Cytoplasm	kinase	NA	NA
DIAPH1	0.362	5	diaphanous homolog 1 (Drosophila)	Plasma Membrane	other	NA	NA
CTSK	0.361	5	cathepsin K	Cytoplasm	peptidase	NA	NA
MYL9	0.36	5	myosin, light chain 9, regulatory	Cytoplasm	other	NA	Mesenchymal
COMMD8	0.36	5	COMM domain containing 8	unknown	other	NA	NA
COL3A1	0.359	5	collagen, type III, alpha 1	Extracellular Space	other	NA	NA
PRSS23	0.359	5	protease, serine, 23	Extracellular Space	peptidase	NA	NA
AHR	0.359	5	aryl hydrocarbon receptor	Nucleus	ligand-dependent nuclear receptor	NA	NA
MUC1	0.359	5	mucin 1, cell surface associated	Plasma Membrane	transcription regulator	NA	NA
GNL2	0.358	5	guanine nucleotide binding protein-like 2 (nucleolar)	Nucleus	enzyme	NA	NA
TNFRSF1A	0.357	5	tumor necrosis factor receptor superfamily, member 1A	Plasma Membrane	transmembrane receptor	Mesenchymal	NA
PRC1	0.356	5	protein regulator of cytokinesis 1	Nucleus	other	NA	NA
ARPC3	0.355	5	actin related protein 2/3 complex, subunit 3, 21kDa	Cytoplasm	other	NA	NA
TMEM176B	0.355	5	transmembrane protein 176B	unknown	other	NA	NA
SLC16A3	0.354	5	solute carrier family 16, member 3 (monocarboxylic acid transporter 4)	Plasma Membrane	transporter	Mesenchymal	NA
PSMB9	0.354	5	proteasome (prosome, macropain) subunit, beta type, 9 (large multifunctional peptidase 2)	Cytoplasm	peptidase	NA	NA
MAN1C1	0.354	5	mannosidase, alpha, class 1C, member 1	Cytoplasm	enzyme	NA	NA
PANX1	0.353	5	pannexin 1	Plasma Membrane	transporter	NA	NA
DEPDC1	0.353	5	DEP domain containing 1	Nucleus	transcription regulator	NA	NA
IFRD1	0.352	5	interferon-related developmental regulator 1	Nucleus	other	NA	NA
BST2	0.349	5	bone marrow stromal cell antigen 2	Plasma Membrane	other	NA	NA
TRIP6	0.349	5	thyroid hormone receptor interactor 6	Extracellular Space	cytokine	Classical	NA
CHEK2	0.349	5	checkpoint kinase 2	Nucleus	kinase	NA	NA
HOXD11	0.349	5	homeobox D11	Nucleus	transcription regulator	NA	NA
DNAH9	0.348	5	dynein, axonemal, heavy chain 9	Cytoplasm	other	NA	NA
6-Sep	0.348	5	septin 6	Cytoplasm	other	NA	NA
GSTK1	0.348	5	glutathione S-transferase kappa 1	Cytoplasm	enzyme	Classical	NA
CSTA	0.347	5	cystatin A (stefin A)	Cytoplasm	other	Mesenchymal	NA
TNFRSF12A	0.347	5	tumor necrosis factor receptor superfamily, member 12A	Plasma Membrane	other	NA	NA
SPCS3	0.347	5	signal peptidase complex subunit 3 homolog (S. cerevisiae)	Cytoplasm	peptidase	NA	NA
BNIP2	0.346	5	BCL2/adenovirus E1B 19kDa interacting protein 2	Cytoplasm	other	NA	NA
CDK7	0.346	5	cyclin-dependent kinase 7	Nucleus	kinase	NA	NA
TNFRSF11B	0.345	5	tumor necrosis factor receptor superfamily, member 11b	Plasma Membrane	transmembrane receptor	NA	NA
NGLY1	0.344	5	N-glycanase 1	Cytoplasm	enzyme	NA	NA
CXorf40A/CXorf40B	0.344	5	chromosome X open reading frame 40A	unknown	other	NA	NA
HIST1H2BD	0.343	5	histone cluster 1, H2bd	Nucleus	other	NA	NA
LAMTOR3	0.343	5	late endosomal/lysosomal adaptor, MAPK and MTOR activator 3	Cytoplasm	other	NA	NA
TUBB	0.342	5	tubulin, beta class I	Cytoplasm	other	NA	NA
TPX2	0.342	5	TPX2, microtubule-associated, homolog (Xenopus laevis)	Nucleus	other	NA	NA
ASL	0.341	5	argininosuccinate lyase	Cytoplasm	enzyme	Mesenchymal	NA
C1orf54	0.341	5	chromosome 1 open reading frame 54	unknown	other	Mesenchymal	NA
KCNE4	0.341	5	potassium voltage-gated channel, Isk-related family, member 4	Plasma Membrane	ion channel	NA	NA
C12orf5	0.34	5	chromosome 12 open reading frame 5	unknown	enzyme	NA	NA
DUSP14	0.34	5	dual specificity phosphatase 14	unknown	phosphatase	NA	NA
VIM	0.339	5	vimentin	Cytoplasm	other	NA	NA
MCAM	0.339	5	melanoma cell adhesion molecule	Plasma Membrane	other	NA	NA
TUBG1	0.338	5	tubulin, gamma 1	Cytoplasm	other	NA	NA
E2F8	0.338	5	E2F transcription factor 8	Nucleus	other	NA	NA
GTF2E2	0.338	5	general transcription factor IIE, polypeptide 2, beta 34kDa	Nucleus	transcription regulator	NA	NA
CHSY1	0.337	5	chondroitin sulfate synthase 1	Cytoplasm	enzyme	NA	NA
ABCC3	0.336	5	ATP-binding cassette, sub-family C (CFTR/MRP), member 3	Plasma Membrane	transporter	NA	NA
SLC25A20	0.336	5	solute carrier family 25 (carnitine/acylcarnitine translocase), member 20	Cytoplasm	transporter	NA	NA
MAGT1	0.335	5	magnesium transporter 1	Plasma Membrane	enzyme	NA	NA
ATRAID	0.335	5	all-trans retinoic acid-induced differentiation factor	unknown	other	NA	NA
PKM	0.334	5	pyruvate kinase, muscle	unknown	kinase	NA	NA
TRIM14	0.334	5	tripartite motif containing 14	Cytoplasm	other	NA	NA
PRUNE	0.334	5	prune homolog (Drosophila)	Nucleus	enzyme	NA	NA
LRRC59	0.334	5	leucine rich repeat containing 59	Cytoplasm	other	NA	NA
ZMYND10	0.334	5	zinc finger, MYND-type containing 10	Cytoplasm	other	NA	NA
PSMA4	0.333	5	proteasome (prosome, macropain) subunit, alpha type, 4	Cytoplasm	peptidase	NA	NA
TLR3	0.333	5	toll-like receptor 3	Plasma Membrane	transmembrane receptor	NA	NA
TRADD	0.332	5	TNFRSF1A-associated via death domain	Cytoplasm	other	Mesenchymal	NA
SLC16A1	0.332	5	solute carrier family 16, member 1 (monocarboxylic acid transporter 1)	Plasma Membrane	transporter	NA	NA
HLA-DQB1	0.332	5	major histocompatibility complex, class II, DQ beta 1	Plasma Membrane	other	NA	NA
MOSPD1	0.332	5	motile sperm domain containing 1	unknown	other	NA	NA
IGFBP4	0.331	5	insulin-like growth factor binding protein 4	Extracellular Space	other	NA	NA
DYNLT1	0.331	5	dynein, light chain, Tctex-type 1	Cytoplasm	other	NA	NA
SRPR	0.33	5	signal recognition particle receptor (docking protein)	Cytoplasm	other	NA	NA
EVC	0.33	5	Ellis van Creveld syndrome	Cytoplasm	other	NA	NA
MFSD1	0.33	5	major facilitator superfamily domain containing 1	unknown	transporter	Mesenchymal	NA
C9orf116	0.33	5	chromosome 9 open reading frame 116	unknown	other	NA	NA
EDEM2	0.33	5	ER degradation enhancer, mannosidase alpha-like 2	Cytoplasm	enzyme	NA	NA
POLR2L	0.329	5	polymerase (RNA) II (DNA directed) polypeptide L, 7.6kDa	Nucleus	enzyme	NA	NA
PREB	0.329	5	prolactin regulatory element binding	Nucleus	transcription regulator	NA	NA
HERC5	0.328	5	HECT and RLD domain containing E3 ubiquitin protein ligase 5	Cytoplasm	enzyme	NA	NA
ANXA2P3	0.327	5	annexin A2 pseudogene 3	unknown	other	NA	NA
10-Sep	0.327	5	septin 10	Cytoplasm	transcription regulator	NA	NA
PARPBP	0.327	5	PARP1 binding protein	Nucleus	other	NA	NA
MSH6	0.327	5	mutS homolog 6 (E. coli)	Nucleus	enzyme	NA	NA
LGALS3BP	0.326	5	lectin, galactoside-binding, soluble, 3 binding protein	Plasma Membrane	transmembrane receptor	NA	NA
CDR2	0.326	5	cerebellar degeneration-related protein 2, 62kDa	Cytoplasm	other	NA	NA
CROT	0.325	5	carnitine O-octanoyltransferase	Cytoplasm	enzyme	NA	NA
TUFT1	0.325	5	tuftelin 1	Extracellular Space	other	NA	NA
SYNC	0.325	5	syncoilin, intermediate filament protein	Cytoplasm	other	NA	NA
CEBPD	0.324	5	CCAAT/enhancer binding protein (C/EBP), delta	Nucleus	transcription regulator	NA	NA
CXCL10	0.324	5	chemokine (C-X-C motif) ligand 10	Extracellular Space	cytokine	NA	NA
ICAM3	0.324	5	intercellular adhesion molecule 3	Plasma Membrane	transmembrane receptor	Mesenchymal	NA
TBL2	0.324	5	transducin (beta)-like 2	Plasma Membrane	other	NA	NA
COPZ2	0.324	5	coatomer protein complex, subunit zeta 2	Cytoplasm	transporter	Mesenchymal	NA
CDCA3	0.324	5	cell division cycle associated 3	Cytoplasm	other	NA	NA
FAM46A	0.324	5	family with sequence similarity 46, member A	unknown	other	NA	NA
SDCBP	0.323	5	syndecan binding protein (syntenin)	Plasma Membrane	enzyme	NA	NA
LY96	0.323	5	lymphocyte antigen 96	Plasma Membrane	other	Mesenchymal	NA
CKAP4	0.323	5	cytoskeleton-associated protein 4	Cytoplasm	other	NA	NA
DNAJC2	0.323	5	DnaJ (Hsp40) homolog, subfamily C, member 2	Nucleus	other	NA	NA
NUP155	0.323	5	nucleoporin 155kDa	Nucleus	transporter	NA	NA
AP2S1	0.322	5	adaptor-related protein complex 2, sigma 1 subunit	Cytoplasm	transporter	NA	NA
RAC2	0.322	5	ras-related C3 botulinum toxin substrate 2 (rho family, small GTP binding protein Rac2)	Cytoplasm	enzyme	Mesenchymal	NA
SP3	0.322	5	Sp3 transcription factor	Nucleus	transcription regulator	NA	NA
TPM2	0.321	5	tropomyosin 2 (beta)	Cytoplasm	other	NA	NA
C1GALT1	0.321	5	core 1 synthase, glycoprotein-N-acetylgalactosamine 3-beta-galactosyltransferase, 1	Plasma Membrane	enzyme	NA	NA
EMP2	0.32	5	epithelial membrane protein 2	Plasma Membrane	other	NA	NA
TMEM176A	0.32	5	transmembrane protein 176A	unknown	other	NA	NA
C9orf40	0.32	5	chromosome 9 open reading frame 40	unknown	other	NA	NA
CASP1	0.319	5	caspase 1, apoptosis-related cysteine peptidase	Cytoplasm	peptidase	Mesenchymal	NA
NCAPG2	0.319	5	non-SMC condensin II complex, subunit G2	Nucleus	other	NA	NA
ENY2	0.319	5	enhancer of yellow 2 homolog (Drosophila)	Nucleus	transcription regulator	NA	NA
SNRPG	0.319	5	small nuclear ribonucleoprotein polypeptide G	Nucleus	other	NA	NA
MICB	0.318	5	MHC class I polypeptide-related sequence B	Plasma Membrane	transmembrane receptor	NA	NA
RAD51AP1	0.317	5	RAD51 associated protein 1	Nucleus	other	NA	NA
SSBP1	0.317	5	single-stranded DNA binding protein 1, mitochondrial	Cytoplasm	other	NA	NA
MANF	0.316	5	mesencephalic astrocyte-derived neurotrophic factor	Extracellular Space	other	NA	NA
KIF23	0.316	5	kinesin family member 23	Cytoplasm	other	NA	NA
HSPE1	0.316	5	heat shock 10kDa protein 1 (chaperonin 10)	Cytoplasm	enzyme	NA	NA
FILIP1L	0.315	5	filamin A interacting protein 1-like	Nucleus	other	NA	NA
IRF7	0.315	5	interferon regulatory factor 7	Nucleus	transcription regulator	NA	NA
NUP85	0.315	5	nucleoporin 85kDa	Cytoplasm	other	NA	NA
SMARCAL1	0.315	5	SWI/SNF related, matrix associated, actin dependent regulator of chromatin, subfamily a-like 1	Nucleus	enzyme	NA	NA
LEPREL1	0.315	5	leprecan-like 1	unknown	enzyme	NA	NA
CBX3	0.315	5	chromobox homolog 3	Nucleus	transcription regulator	NA	NA
SHQ1	0.315	5	SHQ1 homolog (S. cerevisiae)	Nucleus	other	NA	NA
RGS3	0.314	5	regulator of G-protein signaling 3	Nucleus	other	NA	NA
BCL2A1	0.314	5	BCL2-related protein A1	Cytoplasm	other	NA	NA
FAP	0.314	5	fibroblast activation protein, alpha	Cytoplasm	peptidase	NA	NA
ZNF593	0.314	5	zinc finger protein 593	Nucleus	transcription regulator	NA	NA
PBK	0.314	5	PDZ binding kinase	Cytoplasm	kinase	NA	NA
KIF2C	0.313	5	kinesin family member 2C	Nucleus	other	NA	NA
EFNB2	0.313	5	ephrin-B2	Plasma Membrane	other	NA	NA
SAMD9	0.312	5	sterile alpha motif domain containing 9	Cytoplasm	other	NA	NA
C5AR1	0.312	5	complement component 5a receptor 1	Plasma Membrane	G-protein coupled receptor	Mesenchymal	NA
VAMP5	0.312	5	vesicle-associated membrane protein 5 (myobrevin)	Plasma Membrane	transporter	Mesenchymal	NA
ARL1	0.312	5	ADP-ribosylation factor-like 1	Cytoplasm	enzyme	NA	NA
STAT1	0.312	5	signal transducer and activator of transcription 1, 91kDa	Nucleus	transcription regulator	NA	NA
PSMB10	0.311	5	proteasome (prosome, macropain) subunit, beta type, 10	Cytoplasm	peptidase	NA	NA
CCL2	0.311	5	chemokine (C-C motif) ligand 2	Extracellular Space	cytokine	NA	NA
DSG2	0.311	5	desmoglein 2	Plasma Membrane	other	NA	NA
C19orf66	0.311	5	chromosome 19 open reading frame 66	unknown	other	Classical	NA
IER5	0.311	5	immediate early response 5	unknown	other	NA	NA
IL17RC	0.311	5	interleukin 17 receptor C	Plasma Membrane	transmembrane receptor	NA	NA
PSMA7	0.311	5	proteasome (prosome, macropain) subunit, alpha type, 7	Cytoplasm	peptidase	NA	NA
LRRC2	0.311	5	leucine rich repeat containing 2	unknown	other	NA	NA
PKD2	0.31	5	polycystic kidney disease 2 (autosomal dominant)	Plasma Membrane	ion channel	NA	NA
NCF2	0.31	5	neutrophil cytosolic factor 2	Cytoplasm	enzyme	Mesenchymal	NA
TTC12	0.31	5	tetratricopeptide repeat domain 12	unknown	other	NA	NA
ATP5J2	0.31	5	ATP synthase, H+ transporting, mitochondrial Fo complex, subunit F2	Cytoplasm	transporter	NA	NA
OLFML2A	0.309	5	olfactomedin-like 2A	Extracellular Space	other	NA	NA
IL8	0.308	5	interleukin 8	Extracellular Space	cytokine	NA	NA
INSIG2	0.308	5	insulin induced gene 2	Cytoplasm	other	NA	NA
SLC12A7	0.308	5	solute carrier family 12 (potassium/chloride transporters), member 7	Plasma Membrane	transporter	NA	NA
NANS	0.308	5	N-acetylneuraminic acid synthase	Cytoplasm	enzyme	NA	NA
BET1	0.308	5	blocked early in transport 1 homolog (S. cerevisiae)	Cytoplasm	transporter	NA	NA
TMED2	0.308	5	transmembrane emp24 domain trafficking protein 2	Cytoplasm	transporter	NA	NA
PSMC4	0.307	5	proteasome (prosome, macropain) 26S subunit, ATPase, 4	Nucleus	peptidase	NA	NA
IFITM3	0.307	5	interferon induced transmembrane protein 3	Plasma Membrane	other	NA	NA
FAM206A	0.307	5	family with sequence similarity 206, member A	Extracellular Space	other	NA	NA
TSPO	0.306	5	translocator protein (18kDa)	Cytoplasm	transmembrane receptor	NA	NA
G6PD	0.306	5	glucose-6-phosphate dehydrogenase	Cytoplasm	enzyme	NA	NA
LGALS3	0.306	5	lectin, galactoside-binding, soluble, 3	Extracellular Space	other	Mesenchymal	NA
CCHCR1	0.306	5	coiled-coil alpha-helical rod protein 1	Cytoplasm	other	NA	NA
HLA-G	0.306	5	major histocompatibility complex, class I, G	Plasma Membrane	other	NA	NA
PAQR3	0.306	5	progestin and adipoQ receptor family member III	Cytoplasm	other	NA	NA
TIMELESS	0.305	5	timeless homolog (Drosophila)	Nucleus	other	NA	NA
MRPL34	0.305	5	mitochondrial ribosomal protein L34	Cytoplasm	other	NA	NA
FASTKD2	0.305	5	FAST kinase domains 2	Cytoplasm	other	NA	NA
IL15	0.304	5	interleukin 15	Extracellular Space	cytokine	NA	NA
ASF1B	0.304	5	ASF1 anti-silencing function 1 homolog B (S. cerevisiae)	Nucleus	other	NA	NA
SLAMF8	0.304	5	SLAM family member 8	Extracellular Space	other	Mesenchymal	NA
CERS2	0.304	5	ceramide synthase 2	Nucleus	transcription regulator	NA	NA
HEATR2	0.304	5	HEAT repeat containing 2	unknown	other	NA	NA
PTBP3	0.304	5	polypyrimidine tract binding protein 3	Nucleus	other	NA	NA
FTL	0.303	5	ferritin, light polypeptide	Cytoplasm	enzyme	NA	NA
OAS3	0.303	5	2'-5'-oligoadenylate synthetase 3, 100kDa	Cytoplasm	enzyme	NA	NA
CETN3	0.303	5	centrin, EF-hand protein, 3	Nucleus	other	NA	NA
NFE2L3	0.302	5	nuclear factor (erythroid-derived 2)-like 3	Nucleus	transcription regulator	NA	NA
POLE2	0.302	5	polymerase (DNA directed), epsilon 2, accessory subunit	Nucleus	enzyme	NA	NA
GARS	0.302	5	glycyl-tRNA synthetase	Cytoplasm	enzyme	NA	NA
CASC1	0.302	5	cancer susceptibility candidate 1	Cytoplasm	other	NA	NA
TUBA1B	0.301	5	tubulin, alpha 1b	Cytoplasm	other	NA	NA
EBP	0.301	5	emopamil binding protein (sterol isomerase)	Cytoplasm	enzyme	NA	NA
MRPL13	0.301	5	mitochondrial ribosomal protein L13	Cytoplasm	other	NA	NA
ERBB2	0.3	5	v-erb-b2 erythroblastic leukemia viral oncogene homolog 2, neuro/glioblastoma derived oncogene homolog (avian)	Plasma Membrane	kinase	NA	NA
THBD	0.299	5	thrombomodulin	Plasma Membrane	transmembrane receptor	Mesenchymal	NA
NID2	0.299	5	nidogen 2 (osteonidogen)	Extracellular Space	other	NA	NA
NME7	0.299	5	NME/NM23 family member 7	Cytoplasm	kinase	NA	NA
FADD	0.299	5	Fas (TNFRSF6)-associated via death domain	Cytoplasm	other	NA	NA
CD99	0.298	5	CD99 molecule	Plasma Membrane	other	NA	NA
PTPN12	0.298	5	protein tyrosine phosphatase, non-receptor type 12	Cytoplasm	phosphatase	NA	NA
CFLAR	0.298	5	CASP8 and FADD-like apoptosis regulator	Cytoplasm	other	NA	NA
ACN9	0.298	5	ACN9 homolog (S. cerevisiae)	Cytoplasm	other	NA	NA
HIST1H1C	0.298	5	histone cluster 1, H1c	Nucleus	other	NA	NA
NDUFS5	0.298	5	NADH dehydrogenase (ubiquinone) Fe-S protein 5, 15kDa (NADH-coenzyme Q reductase)	Cytoplasm	enzyme	NA	NA
SLN	0.298	5	sarcolipin	Cytoplasm	other	NA	NA
WNT5A	0.298	5	wingless-type MMTV integration site family, member 5A	Extracellular Space	cytokine	NA	NA
CA12	0.298	5	carbonic anhydrase XII	Plasma Membrane	enzyme	NA	NA
IL7R	0.297	5	interleukin 7 receptor	Plasma Membrane	transmembrane receptor	NA	NA
TRIB3	0.297	5	tribbles homolog 3 (Drosophila)	Nucleus	kinase	NA	NA
C17orf101	0.297	5	chromosome 17 open reading frame 101	unknown	enzyme	NA	NA
DOK1	0.296	5	docking protein 1, 62kDa (downstream of tyrosine kinase 1)	Plasma Membrane	other	NA	NA
HOXC10	0.296	5	homeobox C10	Nucleus	transcription regulator	NA	NA
NUP62CL	0.296	5	nucleoporin 62kDa C-terminal like	unknown	other	NA	NA
TMEM38B	0.296	5	transmembrane protein 38B	Nucleus	ion channel	NA	NA
MFN1	0.296	5	mitofusin 1	Cytoplasm	enzyme	NA	NA
PERP	0.296	5	PERP, TP53 apoptosis effector	Plasma Membrane	other	NA	NA
SNRPD2	0.296	5	small nuclear ribonucleoprotein D2 polypeptide 16.5kDa	Nucleus	other	NA	NA
CCT6A	0.296	5	chaperonin containing TCP1, subunit 6A (zeta 1)	Cytoplasm	other	NA	NA
MTTP	0.296	5	microsomal triglyceride transfer protein	Cytoplasm	transporter	NA	NA
LITAF	0.295	5	lipopolysaccharide-induced TNF factor	Nucleus	transcription regulator	NA	NA
PLXNC1	0.295	5	plexin C1	Plasma Membrane	other	NA	NA
MKI67	0.295	5	antigen identified by monoclonal antibody Ki-67	Nucleus	other	NA	NA
TRIP13	0.295	5	thyroid hormone receptor interactor 13	Cytoplasm	transcription regulator	NA	NA
GNAI3	0.294	5	guanine nucleotide binding protein (G protein), alpha inhibiting activity polypeptide 3	Cytoplasm	enzyme	NA	NA
HSD17B10	0.294	5	hydroxysteroid (17-beta) dehydrogenase 10	Cytoplasm	enzyme	NA	NA
DHX40	0.294	5	DEAH (Asp-Glu-Ala-His) box polypeptide 40	unknown	enzyme	NA	NA
HNRNPAB	0.293	5	heterogeneous nuclear ribonucleoprotein A/B	Nucleus	enzyme	NA	NA
NCBP1	0.293	5	nuclear cap binding protein subunit 1, 80kDa	Nucleus	other	NA	NA
NFE2L2	0.293	5	nuclear factor (erythroid-derived 2)-like 2	Nucleus	transcription regulator	NA	NA
TARS	0.293	5	threonyl-tRNA synthetase	Nucleus	enzyme	NA	NA
C17orf62	0.292	5	chromosome 17 open reading frame 62	unknown	other	NA	NA
POLR2H	0.292	5	polymerase (RNA) II (DNA directed) polypeptide H	Nucleus	enzyme	NA	NA
BARD1	0.292	5	BRCA1 associated RING domain 1	Nucleus	transcription regulator	NA	NA
CALR	0.291	5	calreticulin	Cytoplasm	transcription regulator	NA	NA
DNPEP	0.291	5	aspartyl aminopeptidase	Cytoplasm	peptidase	NA	NA
PSMB2	0.291	5	proteasome (prosome, macropain) subunit, beta type, 2	Cytoplasm	peptidase	NA	NA
BBS9	0.29	5	Bardet-Biedl syndrome 9	Extracellular Space	other	NA	NA
NPM1	0.29	5	nucleophosmin (nucleolar phosphoprotein B23, numatrin)	Nucleus	transcription regulator	NA	NA
KRT10	0.289	5	keratin 10	Cytoplasm	other	NA	NA
TMEM185B	0.289	5	transmembrane protein 185B	unknown	other	NA	NA
MED8	0.288	5	mediator complex subunit 8	Nucleus	other	NA	NA
CHCHD3	0.288	5	coiled-coil-helix-coiled-coil-helix domain containing 3	Cytoplasm	other	NA	NA
CCNE1	0.287	5	cyclin E1	Nucleus	transcription regulator	NA	NA
NEIL3	0.286	5	nei endonuclease VIII-like 3 (E. coli)	Nucleus	enzyme	NA	NA
ADPGK	0.286	5	ADP-dependent glucokinase	unknown	kinase	NA	NA
XPOT	0.286	5	exportin, tRNA (nuclear export receptor for tRNAs)	Nucleus	other	NA	NA
DDX47	0.286	5	DEAD (Asp-Glu-Ala-Asp) box polypeptide 47	Nucleus	enzyme	NA	NA
CAP1	0.285	5	CAP, adenylate cyclase-associated protein 1 (yeast)	Plasma Membrane	other	NA	NA
GTF2H5	0.285	5	general transcription factor IIH, polypeptide 5	Nucleus	other	NA	NA
TWIST1	0.285	5	twist homolog 1 (Drosophila)	Nucleus	transcription regulator	NA	NA
PHF14	0.285	5	PHD finger protein 14	unknown	other	NA	NA
WARS2	0.284	5	tryptophanyl tRNA synthetase 2, mitochondrial	Cytoplasm	enzyme	NA	NA
BCAS2	0.283	5	breast carcinoma amplified sequence 2	Nucleus	other	NA	NA
PPIH	0.283	5	peptidylprolyl isomerase H (cyclophilin H)	Nucleus	enzyme	NA	NA
GCNT1	0.283	5	glucosaminyl (N-acetyl) transferase 1, core 2	Cytoplasm	enzyme	Mesenchymal	NA
SLC37A1	0.283	5	solute carrier family 37 (glycerol-3-phosphate transporter), member 1	Plasma Membrane	transporter	NA	NA
ITGBL1	0.282	5	integrin, beta-like 1 (with EGF-like repeat domains)	unknown	other	NA	NA
EXT2	0.282	5	exostosin 2	Cytoplasm	enzyme	NA	NA
TMED3	0.282	5	transmembrane emp24 protein transport domain containing 3	Cytoplasm	transporter	NA	NA
SLC35F5	0.282	5	solute carrier family 35, member F5	unknown	other	NA	NA
HPRT1	0.282	5	hypoxanthine phosphoribosyltransferase 1	Cytoplasm	enzyme	Neural	NA
CANT1	0.281	5	calcium activated nucleotidase 1	Extracellular Space	enzyme	NA	NA
HOXA7	0.281	5	homeobox A7	Nucleus	transcription regulator	NA	NA
LAPTM4A	0.281	5	lysosomal protein transmembrane 4 alpha	Cytoplasm	other	NA	NA
MORF4L2	0.281	5	mortality factor 4 like 2	Nucleus	other	Neural	NA
RARRES3	0.28	5	retinoic acid receptor responder (tazarotene induced) 3	Cytoplasm	enzyme	NA	NA
TBC1D19	0.28	5	TBC1 domain family, member 19	unknown	other	NA	NA
COQ10B	0.28	5	coenzyme Q10 homolog B (S. cerevisiae)	Cytoplasm	other	NA	NA
DBF4	0.279	5	DBF4 homolog (S. cerevisiae)	Nucleus	kinase	NA	NA
KMO	0.279	5	kynurenine 3-monooxygenase (kynurenine 3-hydroxylase)	Cytoplasm	enzyme	NA	NA
PSMD14	0.278	5	proteasome (prosome, macropain) 26S subunit, non-ATPase, 14	Cytoplasm	peptidase	NA	NA
MTFR1	0.278	5	mitochondrial fission regulator 1	Cytoplasm	other	NA	NA
PPIB	0.277	5	peptidylprolyl isomerase B (cyclophilin B)	Cytoplasm	enzyme	NA	NA
B4GALT4	0.277	5	UDP-Gal:betaGlcNAc beta 1,4- galactosyltransferase, polypeptide 4	Cytoplasm	enzyme	NA	NA
IL13RA1	0.276	5	interleukin 13 receptor, alpha 1	Plasma Membrane	transmembrane receptor	NA	NA
CAV2	0.276	5	caveolin 2	Plasma Membrane	other	NA	NA
GFPT1	0.275	5	glutamine--fructose-6-phosphate transaminase 1	Cytoplasm	enzyme	NA	NA
POR	0.274	5	P450 (cytochrome) oxidoreductase	Cytoplasm	enzyme	NA	NA
FBN1	0.273	5	fibrillin 1	Extracellular Space	other	NA	NA
HES1	0.273	5	hairy and enhancer of split 1, (Drosophila)	Nucleus	transcription regulator	NA	NA
CELSR1	0.273	5	cadherin, EGF LAG seven-pass G-type receptor 1 (flamingo homolog, Drosophila)	Plasma Membrane	G-protein coupled receptor	NA	NA
FCGRT	0.272	5	Fc fragment of IgG, receptor, transporter, alpha	Plasma Membrane	transmembrane receptor	NA	NA
PDS5A	0.272	5	PDS5, regulator of cohesion maintenance, homolog A (S. cerevisiae)	Nucleus	other	NA	NA
HMGN1	0.272	5	high mobility group nucleosome binding domain 1	Nucleus	transcription regulator	NA	NA
SLC5A3	0.272	5	solute carrier family 5 (sodium/myo-inositol cotransporter), member 3	Plasma Membrane	transporter	NA	NA
PSMG1	0.271	5	proteasome (prosome, macropain) assembly chaperone 1	Plasma Membrane	other	NA	NA
SLC25A14	0.271	5	solute carrier family 25 (mitochondrial carrier, brain), member 14	Cytoplasm	transporter	NA	NA
HLA-B	0.27	5	major histocompatibility complex, class I, B	Plasma Membrane	transmembrane receptor	NA	NA
OLFML1	0.27	5	olfactomedin-like 1	Extracellular Space	other	NA	NA
NME5	0.27	5	NME/NM23 family member 5	unknown	kinase	NA	NA
SRP72	0.269	5	signal recognition particle 72kDa	Nucleus	kinase	NA	NA
CD2AP	0.269	5	CD2-associated protein	Cytoplasm	other	Mesenchymal	NA
HIST1H2AG (includes others)	0.269	5	histone cluster 1, H2ag	Nucleus	other	NA	NA
NDUFA9	0.269	5	NADH dehydrogenase (ubiquinone) 1 alpha subcomplex, 9, 39kDa	Cytoplasm	enzyme	NA	NA
CITED2	0.268	5	Cbp/p300-interacting transactivator, with Glu/Asp-rich carboxy-terminal domain, 2	Nucleus	transcription regulator	NA	NA
MRPL20	0.268	5	mitochondrial ribosomal protein L20	Cytoplasm	other	NA	NA
TFB2M	0.267	5	transcription factor B2, mitochondrial	Cytoplasm	enzyme	NA	NA
ITGB1BP1	0.267	5	integrin beta 1 binding protein 1	Plasma Membrane	other	NA	NA
LAGE3	0.267	5	L antigen family, member 3	unknown	other	NA	NA
TEX264	0.266	5	testis expressed 264	Extracellular Space	other	NA	NA
C7orf49	0.266	5	chromosome 7 open reading frame 49	unknown	other	NA	NA
KIF11	0.265	5	kinesin family member 11	Nucleus	other	NA	NA
SULF1	0.265	5	sulfatase 1	Cytoplasm	enzyme	NA	NA
NRAS	0.265	5	neuroblastoma RAS viral (v-ras) oncogene homolog	Plasma Membrane	enzyme	NA	NA
SEC22B	0.265	5	SEC22 vesicle trafficking protein homolog B (S. cerevisiae) (gene/pseudogene)	Cytoplasm	other	NA	NA
WBSCR22	0.263	5	Williams Beuren syndrome chromosome region 22	Nucleus	enzyme	NA	NA
UBE2K	0.262	5	ubiquitin-conjugating enzyme E2K	Cytoplasm	transcription regulator	NA	NA
SAR1B	0.262	5	SAR1 homolog B (S. cerevisiae)	Cytoplasm	enzyme	NA	NA
MED28	0.262	5	mediator complex subunit 28	Nucleus	other	NA	NA
LMNB1	0.261	5	lamin B1	Nucleus	other	NA	NA
HOXD13	0.259	5	homeobox D13	Nucleus	transcription regulator	NA	NA
HLA-C	0.259	5	major histocompatibility complex, class I, C	Plasma Membrane	other	NA	NA
PPP1R2	0.259	5	protein phosphatase 1, regulatory (inhibitor) subunit 2	Cytoplasm	phosphatase	NA	NA
LRRC48	0.259	5	leucine rich repeat containing 48	Cytoplasm	other	NA	NA
PUS7	0.258	5	pseudouridylate synthase 7 homolog (S. cerevisiae)	unknown	other	NA	NA
HBXIP	0.257	5	hepatitis B virus x interacting protein	Cytoplasm	other	NA	NA
FAM172A	0.257	5	family with sequence similarity 172, member A	Cytoplasm	transcription regulator	NA	NA
YIPF4	0.257	5	Yip1 domain family, member 4	Cytoplasm	other	NA	NA
DDX60	0.256	5	DEAD (Asp-Glu-Ala-Asp) box polypeptide 60	Cytoplasm	enzyme	NA	NA
PIGB	0.256	5	phosphatidylinositol glycan anchor biosynthesis, class B	Cytoplasm	enzyme	NA	NA
IRX5	0.255	5	iroquois homeobox 5	Nucleus	transcription regulator	NA	NA
AGTR1	0.255	5	angiotensin II receptor, type 1	Plasma Membrane	G-protein coupled receptor	NA	NA
TMEM50B	0.255	5	transmembrane protein 50B	Plasma Membrane	other	NA	NA
TPBG	0.254	5	trophoblast glycoprotein	Plasma Membrane	other	NA	NA
CCL5	0.252	5	chemokine (C-C motif) ligand 5	Extracellular Space	cytokine	NA	NA
CYBA	0.252	5	cytochrome b-245, alpha polypeptide	Cytoplasm	enzyme	NA	NA
PTPRC	0.252	5	protein tyrosine phosphatase, receptor type, C	Plasma Membrane	phosphatase	Mesenchymal	NA
RBM47	0.252	5	RNA binding motif protein 47	unknown	other	Mesenchymal	NA
PSMD5	0.252	5	proteasome (prosome, macropain) 26S subunit, non-ATPase, 5	Cytoplasm	other	NA	NA
RPA2	0.252	5	replication protein A2, 32kDa	Nucleus	other	NA	NA
TTC4	0.252	5	tetratricopeptide repeat domain 4	unknown	other	NA	NA
DGUOK	0.251	5	deoxyguanosine kinase	Cytoplasm	kinase	NA	NA
ARFIP1	0.251	5	ADP-ribosylation factor interacting protein 1	Cytoplasm	other	NA	NA
COPS8	0.25	5	COP9 constitutive photomorphogenic homolog subunit 8 (Arabidopsis)	Nucleus	other	NA	NA
SSBP2	0.25	5	single-stranded DNA binding protein 2	Nucleus	transcription regulator	NA	NA
TRAPPC3	0.25	5	trafficking protein particle complex 3	Cytoplasm	other	NA	NA
NDUFB3	0.25	5	NADH dehydrogenase (ubiquinone) 1 beta subcomplex, 3, 12kDa	Cytoplasm	enzyme	NA	NA
PIAS2	0.249	5	protein inhibitor of activated STAT, 2	Nucleus	transcription regulator	NA	NA
SLC35D1	0.248	5	solute carrier family 35 (UDP-glucuronic acid/UDP-N-acetylgalactosamine dual transporter), member D1	Cytoplasm	transporter	NA	NA
HGF	0.248	5	hepatocyte growth factor (hepapoietin A; scatter factor)	Extracellular Space	growth factor	NA	NA
VANGL1	0.248	5	vang-like 1 (van gogh, Drosophila)	Cytoplasm	other	NA	NA
NTS	0.247	5	neurotensin	Extracellular Space	other	NA	NA
PTS	0.247	5	6-pyruvoyltetrahydropterin synthase	Cytoplasm	enzyme	NA	NA
THOC7	0.247	5	THO complex 7 homolog (Drosophila)	Nucleus	other	NA	NA
NDUFB2	0.246	5	NADH dehydrogenase (ubiquinone) 1 beta subcomplex, 2, 8kDa	Cytoplasm	enzyme	NA	NA
CKLF	0.246	5	chemokine-like factor	Extracellular Space	cytokine	NA	NA
PSMB1	0.246	5	proteasome (prosome, macropain) subunit, beta type, 1	Cytoplasm	peptidase	NA	NA
SNUPN	0.245	5	snurportin 1	Nucleus	other	NA	NA
ACVR1	0.245	5	activin A receptor, type I	Plasma Membrane	kinase	NA	NA
GOLPH3L	0.244	5	golgi phosphoprotein 3-like	Cytoplasm	other	NA	NA
MED7	0.244	5	mediator complex subunit 7	Nucleus	transcription regulator	NA	NA
HINT1	0.244	5	histidine triad nucleotide binding protein 1	Nucleus	enzyme	NA	NA
DYNC2LI1	0.243	5	dynein, cytoplasmic 2, light intermediate chain 1	Cytoplasm	other	NA	NA
ERP29	0.241	5	endoplasmic reticulum protein 29	Cytoplasm	transporter	NA	NA
HFE	0.24	5	hemochromatosis	Plasma Membrane	transmembrane receptor	Mesenchymal	NA
ZNF330	0.24	5	zinc finger protein 330	Nucleus	other	NA	NA
NKX3-2	0.239	5	NK3 homeobox 2	Nucleus	transcription regulator	NA	NA
COL21A1	0.239	5	collagen, type XXI, alpha 1	Extracellular Space	other	NA	NA
RAB1A	0.238	5	RAB1A, member RAS oncogene family	Cytoplasm	enzyme	NA	NA
SULT1A1	0.238	5	sulfotransferase family, cytosolic, 1A, phenol-preferring, member 1	Cytoplasm	enzyme	NA	NA
EHHADH	0.237	5	enoyl-CoA, hydratase/3-hydroxyacyl CoA dehydrogenase	Cytoplasm	enzyme	NA	NA
C1orf174	0.237	5	chromosome 1 open reading frame 174	unknown	other	NA	NA
DPM3	0.237	5	dolichyl-phosphate mannosyltransferase polypeptide 3	Cytoplasm	enzyme	NA	NA
HHLA3	0.233	5	HERV-H LTR-associating 3	unknown	other	NA	NA
AUP1	0.233	5	ancient ubiquitous protein 1	Cytoplasm	other	NA	NA
ASS1	0.232	5	argininosuccinate synthase 1	Cytoplasm	enzyme	NA	NA
GPN3	0.232	5	GPN-loop GTPase 3	Cytoplasm	other	NA	NA
TIMM8B	0.231	5	translocase of inner mitochondrial membrane 8 homolog B (yeast)	Cytoplasm	transporter	NA	NA
EFEMP1	0.229	5	EGF containing fibulin-like extracellular matrix protein 1	Extracellular Space	enzyme	NA	NA
THADA	0.228	5	thyroid adenoma associated	unknown	other	NA	NA
MRPS30	0.227	5	mitochondrial ribosomal protein S30	Cytoplasm	enzyme	NA	NA
DDX58	0.227	5	DEAD (Asp-Glu-Ala-Asp) box polypeptide 58	Cytoplasm	enzyme	NA	NA
BCAP29	0.226	5	B-cell receptor-associated protein 29	Cytoplasm	transporter	NA	NA
PPIE	0.225	5	peptidylprolyl isomerase E (cyclophilin E)	Nucleus	enzyme	NA	NA
CYP39A1	0.225	5	cytochrome P450, family 39, subfamily A, polypeptide 1	Cytoplasm	enzyme	NA	NA
TFPI	0.223	5	tissue factor pathway inhibitor (lipoprotein-associated coagulation inhibitor)	Extracellular Space	other	NA	NA
LIMS1	0.222	5	LIM and senescent cell antigen-like domains 1	Plasma Membrane	other	NA	NA
TM2D1	0.22	5	TM2 domain containing 1	Plasma Membrane	G-protein coupled receptor	NA	NA
ATP5F1	0.219	5	ATP synthase, H+ transporting, mitochondrial Fo complex, subunit B1	Cytoplasm	transporter	Neural	NA
RBM7	0.215	5	RNA binding motif protein 7	unknown	other	NA	NA
CAPZA2	0.212	5	capping protein (actin filament) muscle Z-line, alpha 2	Cytoplasm	other	NA	NA
UBA3	0.21	5	ubiquitin-like modifier activating enzyme 3	Cytoplasm	enzyme	NA	NA
ST3GAL2	-0.198	5	ST3 beta-galactoside alpha-2,3-sialyltransferase 2	Cytoplasm	enzyme	NA	NA
SAMM50	-0.202	5	sorting and assembly machinery component 50 homolog (S. cerevisiae)	Cytoplasm	other	NA	NA
TRO	-0.206	5	trophinin	Plasma Membrane	other	NA	NA
HELZ	-0.213	5	helicase with zinc finger	Nucleus	enzyme	NA	NA
CIZ1	-0.218	5	CDKN1A interacting zinc finger protein 1	Nucleus	transporter	NA	NA
PPP3CA	-0.22	5	protein phosphatase 3, catalytic subunit, alpha isozyme	Cytoplasm	phosphatase	NA	NA
ASB1	-0.222	5	ankyrin repeat and SOCS box containing 1	Nucleus	transcription regulator	NA	NA
GREB1	-0.223	5	growth regulation by estrogen in breast cancer 1	Cytoplasm	other	NA	NA
LRP3	-0.226	5	low density lipoprotein receptor-related protein 3	Plasma Membrane	transmembrane receptor	NA	NA
DGCR14	-0.226	5	DiGeorge syndrome critical region gene 14	Nucleus	other	NA	NA
KIAA0664	-0.229	5	KIAA0664	Cytoplasm	translation regulator	NA	NA
SLC25A36	-0.23	5	solute carrier family 25 (pyrimidine nucleotide carrier ), member 36	Cytoplasm	transporter	NA	NA
MTCH1	-0.23	5	mitochondrial carrier 1	Cytoplasm	other	NA	NA
SRRM2	-0.231	5	serine/arginine repetitive matrix 2	Nucleus	other	NA	Proneural
RBM12B	-0.232	5	RNA binding motif protein 12B	unknown	other	NA	NA
GGA1	-0.233	5	golgi-associated, gamma adaptin ear containing, ARF binding protein 1	Cytoplasm	transporter	NA	NA
NKX2-2	-0.233	5	NK2 homeobox 2	Nucleus	transcription regulator	Proneural	NA
CHD3	-0.235	5	chromodomain helicase DNA binding protein 3	Nucleus	enzyme	NA	NA
CHD4	-0.235	5	chromodomain helicase DNA binding protein 4	Nucleus	enzyme	NA	NA
CRMP1	-0.236	5	collapsin response mediator protein 1	Cytoplasm	enzyme	Proneural	NA
MYT1L	-0.236	5	myelin transcription factor 1-like	Nucleus	transcription regulator	NA	NA
CACNG4	-0.238	5	calcium channel, voltage-dependent, gamma subunit 4	Plasma Membrane	ion channel	NA	NA
TXNRD2	-0.24	5	thioredoxin reductase 2	Cytoplasm	enzyme	NA	NA
SUPT6H	-0.24	5	suppressor of Ty 6 homolog (S. cerevisiae)	Nucleus	transcription regulator	NA	NA
CELSR3	-0.241	5	cadherin, EGF LAG seven-pass G-type receptor 3 (flamingo homolog, Drosophila)	Plasma Membrane	G-protein coupled receptor	NA	NA
ARNT2	-0.242	5	aryl-hydrocarbon receptor nuclear translocator 2	Nucleus	transcription regulator	NA	NA
SEMA7A	-0.243	5	semaphorin 7A, GPI membrane anchor (John Milton Hagen blood group)	Plasma Membrane	other	NA	NA
SDHA	-0.246	5	succinate dehydrogenase complex, subunit A, flavoprotein (Fp)	Cytoplasm	enzyme	NA	NA
USP20	-0.246	5	ubiquitin specific peptidase 20	Cytoplasm	peptidase	NA	NA
DGKB	-0.247	5	diacylglycerol kinase, beta 90kDa	Cytoplasm	kinase	NA	NA
PODXL2	-0.247	5	podocalyxin-like 2	Plasma Membrane	other	Proneural	NA
KIF1C	-0.247	5	kinesin family member 1C	Cytoplasm	other	NA	NA
MPRIP	-0.247	5	myosin phosphatase Rho interacting protein	Cytoplasm	other	NA	NA
JHDM1D	-0.247	5	jumonji C domain containing histone demethylase 1 homolog D (S. cerevisiae)	Nucleus	enzyme	NA	NA
LSS	-0.248	5	lanosterol synthase (2,3-oxidosqualene-lanosterol cyclase)	Cytoplasm	enzyme	NA	NA
PTGDR2	-0.248	5	prostaglandin D2 receptor 2	Plasma Membrane	G-protein coupled receptor	NA	NA
PPP6R3	-0.248	5	protein phosphatase 6, regulatory subunit 3	Cytoplasm	other	NA	NA
PDIA2	-0.248	5	protein disulfide isomerase family A, member 2	Cytoplasm	enzyme	NA	NA
CDYL	-0.249	5	chromodomain protein, Y-like	Nucleus	transcription regulator	NA	NA
NPTXR	-0.249	5	neuronal pentraxin receptor	Plasma Membrane	transmembrane receptor	NA	NA
ACACA	-0.249	5	acetyl-CoA carboxylase alpha	Cytoplasm	enzyme	NA	NA
ELMO2	-0.249	5	engulfment and cell motility 2	Cytoplasm	other	NA	NA
RANBP3	-0.249	5	RAN binding protein 3	Nucleus	other	NA	NA
MAN2C1	-0.25	5	mannosidase, alpha, class 2C, member 1	Cytoplasm	enzyme	NA	NA
HR	-0.25	5	hairless homolog (mouse)	Nucleus	transcription regulator	NA	NA
MDFI	-0.25	5	MyoD family inhibitor	Cytoplasm	other	NA	NA
MYCBP2	-0.251	5	MYC binding protein 2, E3 ubiquitin protein ligase	Nucleus	enzyme	NA	NA
IVD	-0.251	5	isovaleryl-CoA dehydrogenase	Cytoplasm	enzyme	NA	NA
ARHGEF4	-0.251	5	Rho guanine nucleotide exchange factor (GEF) 4	Cytoplasm	other	NA	NA
GPLD1	-0.252	5	glycosylphosphatidylinositol specific phospholipase D1	Cytoplasm	enzyme	NA	NA
ERCC6	-0.253	5	excision repair cross-complementing rodent repair deficiency, complementation group 6	Nucleus	transcription regulator	NA	NA
DHX30	-0.253	5	DEAH (Asp-Glu-Ala-His) box polypeptide 30	Nucleus	enzyme	NA	NA
BRSK2	-0.253	5	BR serine/threonine kinase 2	unknown	kinase	NA	NA
MYO16	-0.254	5	myosin XVI	Cytoplasm	other	NA	NA
ABTB2	-0.254	5	ankyrin repeat and BTB (POZ) domain containing 2	unknown	other	NA	NA
ARHGAP35	-0.254	5	Rho GTPase activating protein 35	Nucleus	transcription regulator	NA	NA
NOVA1	-0.255	5	neuro-oncological ventral antigen 1	Nucleus	other	NA	NA
CAMSAP1	-0.255	5	calmodulin regulated spectrin-associated protein 1	unknown	other	NA	NA
POMT1	-0.255	5	protein-O-mannosyltransferase 1	Cytoplasm	enzyme	NA	NA
BTBD2	-0.255	5	BTB (POZ) domain containing 2	Cytoplasm	other	Classical	NA
SPG7	-0.255	5	spastic paraplegia 7 (pure and complicated autosomal recessive)	Cytoplasm	peptidase	NA	NA
HNRPDL	-0.256	5	heterogeneous nuclear ribonucleoprotein D-like	Nucleus	other	NA	NA
ABCA3	-0.257	5	ATP-binding cassette, sub-family A (ABC1), member 3	Plasma Membrane	transporter	NA	NA
VPS33B	-0.257	5	vacuolar protein sorting 33 homolog B (yeast)	Cytoplasm	transporter	NA	NA
TP53BP2	-0.257	5	tumor protein p53 binding protein, 2	Nucleus	other	NA	NA
ZNF821	-0.258	5	zinc finger protein 821	unknown	other	NA	NA
TNIK	-0.258	5	TRAF2 and NCK interacting kinase	Cytoplasm	kinase	NA	NA
MED13L	-0.259	5	mediator complex subunit 13-like	Nucleus	other	NA	NA
CUL9	-0.259	5	cullin 9	Cytoplasm	other	NA	NA
SETD5	-0.259	5	SET domain containing 5	unknown	other	NA	NA
BZRAP1	-0.259	5	benzodiazapine receptor (peripheral) associated protein 1	Cytoplasm	other	NA	NA
NCOR2	-0.259	5	nuclear receptor corepressor 2	Nucleus	transcription regulator	NA	NA
UTP14C	-0.26	5	UTP14, U3 small nucleolar ribonucleoprotein, homolog C (yeast)	Nucleus	other	NA	NA
ELAVL3	-0.26	5	ELAV (embryonic lethal, abnormal vision, Drosophila)-like 3 (Hu antigen C)	Nucleus	other	NA	NA
LPPR2	-0.26	5	lipid phosphate phosphatase-related protein type 2	unknown	phosphatase	NA	NA
UBE4B	-0.261	5	ubiquitination factor E4B	Cytoplasm	enzyme	NA	NA
ANKRD12	-0.261	5	ankyrin repeat domain 12	Nucleus	other	NA	NA
SORBS3	-0.261	5	sorbin and SH3 domain containing 3	Cytoplasm	other	NA	NA
SRGAP3	-0.261	5	SLIT-ROBO Rho GTPase activating protein 3	Cytoplasm	other	Proneural	NA
KIAA0182	-0.262	5	KIAA0182	Extracellular Space	other	NA	NA
MIER2	-0.262	5	mesoderm induction early response 1, family member 2	Extracellular Space	other	NA	NA
TMEM63A	-0.262	5	transmembrane protein 63A	Cytoplasm	other	NA	NA
ATP7B	-0.263	5	ATPase, Cu++ transporting, beta polypeptide	Cytoplasm	transporter	NA	NA
NOTCH1	-0.263	5	notch 1	Plasma Membrane	transcription regulator	NA	NA
NDST4	-0.264	5	N-deacetylase/N-sulfotransferase (heparan glucosaminyl) 4	Cytoplasm	enzyme	NA	NA
NPDC1	-0.264	5	neural proliferation, differentiation and control, 1	Extracellular Space	other	NA	NA
KIAA1462	-0.264	5	KIAA1462	Plasma Membrane	other	NA	NA
FAM125B	-0.264	5	family with sequence similarity 125, member B	Cytoplasm	other	Proneural	NA
HIF3A	-0.265	5	hypoxia inducible factor 3, alpha subunit	Nucleus	transcription regulator	NA	NA
SCD5	-0.265	5	stearoyl-CoA desaturase 5	Cytoplasm	enzyme	NA	NA
CABIN1	-0.265	5	calcineurin binding protein 1	Nucleus	other	NA	NA
EFHD1	-0.266	5	EF-hand domain family, member D1	Cytoplasm	other	NA	NA
PIK3CB	-0.266	5	phosphatidylinositol-4,5-bisphosphate 3-kinase, catalytic subunit beta	Cytoplasm	kinase	NA	NA
GRIK5	-0.266	5	glutamate receptor, ionotropic, kainate 5	Plasma Membrane	ion channel	Classical	NA
CEP350	-0.268	5	centrosomal protein 350kDa	Cytoplasm	other	NA	NA
FASN	-0.268	5	fatty acid synthase	Cytoplasm	enzyme	NA	NA
TSC2	-0.268	5	tuberous sclerosis 2	Cytoplasm	other	NA	NA
FLJ22184	-0.268	5	putative uncharacterized protein FLJ22184	unknown	other	NA	NA
CNP	-0.269	5	2',3'-cyclic nucleotide 3' phosphodiesterase	Cytoplasm	enzyme	NA	NA
TSPAN14	-0.269	5	tetraspanin 14	unknown	other	NA	NA
GFOD1	-0.27	5	glucose-fructose oxidoreductase domain containing 1	unknown	enzyme	NA	NA
HIF1AN	-0.27	5	hypoxia inducible factor 1, alpha subunit inhibitor	Nucleus	enzyme	NA	NA
OSBPL2	-0.27	5	oxysterol binding protein-like 2	Cytoplasm	other	NA	NA
PTPRE	-0.27	5	protein tyrosine phosphatase, receptor type, E	Plasma Membrane	phosphatase	NA	NA
SENP6	-0.271	5	SUMO1/sentrin specific peptidase 6	Cytoplasm	peptidase	NA	NA
ARHGEF7	-0.271	5	Rho guanine nucleotide exchange factor (GEF) 7	Cytoplasm	other	NA	NA
KIAA0913	-0.272	5	KIAA0913	Extracellular Space	other	NA	NA
SFTPC	-0.272	5	surfactant protein C	Extracellular Space	other	NA	NA
HMBOX1	-0.272	5	homeobox containing 1	Nucleus	transcription regulator	NA	NA
HSP90AB1	-0.273	5	heat shock protein 90kDa alpha (cytosolic), class B member 1	Cytoplasm	enzyme	NA	NA
PPP2R2D	-0.273	5	protein phosphatase 2, regulatory subunit B, delta	Nucleus	phosphatase	NA	NA
AJAP1	-0.273	5	adherens junctions associated protein 1	Plasma Membrane	other	NA	NA
RYR1	-0.273	5	ryanodine receptor 1 (skeletal)	Cytoplasm	ion channel	NA	NA
MAPK12	-0.273	5	mitogen-activated protein kinase 12	Cytoplasm	kinase	NA	NA
DOCK9	-0.274	5	dedicator of cytokinesis 9	Cytoplasm	other	NA	NA
DISC1	-0.274	5	disrupted in schizophrenia 1	Cytoplasm	other	NA	NA
NBR1	-0.275	5	neighbor of BRCA1 gene 1	Cytoplasm	other	NA	NA
PNISR	-0.275	5	PNN-interacting serine/arginine-rich protein	Nucleus	other	NA	NA
SBF1	-0.275	5	SET binding factor 1	Plasma Membrane	phosphatase	NA	NA
GBF1	-0.275	5	golgi brefeldin A resistant guanine nucleotide exchange factor 1	Cytoplasm	other	NA	NA
DLG5	-0.275	5	discs, large homolog 5 (Drosophila)	Plasma Membrane	other	NA	NA
CDK5R1	-0.276	5	cyclin-dependent kinase 5, regulatory subunit 1 (p35)	Nucleus	kinase	Proneural	NA
ATP5C1	-0.276	5	ATP synthase, H+ transporting, mitochondrial F1 complex, gamma polypeptide 1	Cytoplasm	transporter	NA	NA
RPL28	-0.276	5	ribosomal protein L28	Cytoplasm	other	NA	NA
GABBR2	-0.277	5	gamma-aminobutyric acid (GABA) B receptor, 2	Plasma Membrane	G-protein coupled receptor	NA	NA
TOX	-0.278	5	thymocyte selection-associated high mobility group box	Nucleus	other	NA	NA
DGCR5	-0.278	5	DiGeorge syndrome critical region gene 5 (non-protein coding)	unknown	other	NA	NA
TNPO2	-0.278	5	transportin 2	Nucleus	transporter	NA	NA
PLXNB3	-0.278	5	plexin B3	Plasma Membrane	other	NA	NA
PUM2	-0.279	5	pumilio homolog 2 (Drosophila)	Cytoplasm	other	NA	NA
ACTR1A	-0.279	5	ARP1 actin-related protein 1 homolog A, centractin alpha (yeast)	Cytoplasm	other	Proneural	NA
EIF4EBP2	-0.279	5	eukaryotic translation initiation factor 4E binding protein 2	Cytoplasm	other	NA	NA
LPHN1	-0.279	5	latrophilin 1	Plasma Membrane	G-protein coupled receptor	NA	NA
ZCCHC14	-0.279	5	zinc finger, CCHC domain containing 14	unknown	other	NA	NA
TYRO3	-0.279	5	TYRO3 protein tyrosine kinase	Plasma Membrane	kinase	NA	NA
UBE2L3	-0.279	5	ubiquitin-conjugating enzyme E2L 3	Cytoplasm	enzyme	NA	NA
MAP4K4	-0.28	5	mitogen-activated protein kinase kinase kinase kinase 4	Cytoplasm	kinase	NA	NA
NTRK2	-0.28	5	neurotrophic tyrosine kinase, receptor, type 2	Plasma Membrane	kinase	NA	NA
PIP4K2A	-0.28	5	phosphatidylinositol-5-phosphate 4-kinase, type II, alpha	Cytoplasm	kinase	NA	NA
FAM5B	-0.28	5	family with sequence similarity 5, member B	Cytoplasm	other	NA	NA
SFSWAP	-0.281	5	splicing factor, suppressor of white-apricot homolog (Drosophila)	Nucleus	other	NA	NA
TBKBP1	-0.281	5	TBK1 binding protein 1	unknown	other	NA	NA
AKR1C1/AKR1C2	-0.282	5	aldo-keto reductase family 1, member C2 (dihydrodiol dehydrogenase 2; bile acid binding protein; 3-alpha hydroxysteroid dehydrogenase, type III)	Cytoplasm	enzyme	NA	NA
MATK	-0.282	5	megakaryocyte-associated tyrosine kinase	Cytoplasm	kinase	NA	NA
DGKI	-0.282	5	diacylglycerol kinase, iota	Cytoplasm	kinase	Proneural	NA
GABARAPL2	-0.282	5	GABA(A) receptor-associated protein-like 2	Cytoplasm	other	Neural	NA
HMP19	-0.282	5	HMP19 protein	Cytoplasm	other	NA	NA
NMT2	-0.283	5	N-myristoyltransferase 2	Cytoplasm	enzyme	NA	NA
RPRM	-0.283	5	reprimo, TP53 dependent G2 arrest mediator candidate	Cytoplasm	other	NA	NA
TRIM3	-0.283	5	tripartite motif containing 3	Cytoplasm	other	NA	NA
EVL	-0.283	5	Enah/Vasp-like	Cytoplasm	other	NA	NA
SMCR7L	-0.283	5	Smith-Magenis syndrome chromosome region, candidate 7-like	Cytoplasm	other	NA	NA
SMPD3	-0.283	5	sphingomyelin phosphodiesterase 3, neutral membrane (neutral sphingomyelinase II)	Cytoplasm	enzyme	NA	NA
DLGAP1	-0.283	5	discs, large (Drosophila) homolog-associated protein 1	Plasma Membrane	other	NA	NA
FAM131B	-0.283	5	family with sequence similarity 131, member B	unknown	other	NA	NA
PNMAL1	-0.284	5	paraneoplastic Ma antigen family-like 1	unknown	other	NA	NA
SAFB	-0.284	5	scaffold attachment factor B	Nucleus	other	NA	NA
PCGF2	-0.284	5	polycomb group ring finger 2	Nucleus	transcription regulator	NA	NA
RTN1	-0.285	5	reticulon 1	Cytoplasm	other	NA	NA
IGF1R	-0.285	5	insulin-like growth factor 1 receptor	Plasma Membrane	transmembrane receptor	NA	NA
ANKRD26	-0.286	5	ankyrin repeat domain 26	Nucleus	transcription regulator	NA	NA
CLNS1A	-0.286	5	chloride channel, nucleotide-sensitive, 1A	Plasma Membrane	ion channel	NA	NA
CYP2A13/CYP2A6	-0.286	5	cytochrome P450, family 2, subfamily A, polypeptide 6	Cytoplasm	enzyme	NA	NA
PELP1	-0.286	5	proline, glutamate and leucine rich protein 1	Nucleus	other	NA	NA
GABRB3	-0.287	5	gamma-aminobutyric acid (GABA) A receptor, beta 3	Plasma Membrane	ion channel	NA	NA
CACNG2	-0.287	5	calcium channel, voltage-dependent, gamma subunit 2	Plasma Membrane	ion channel	NA	NA
FRMD4A	-0.287	5	FERM domain containing 4A	Plasma Membrane	other	NA	NA
KAT8	-0.287	5	K(lysine) acetyltransferase 8	Nucleus	enzyme	NA	NA
ZC3H13	-0.288	5	zinc finger CCCH-type containing 13	Extracellular Space	other	NA	NA
ZNF219	-0.288	5	zinc finger protein 219	Nucleus	transcription regulator	NA	NA
CACNA1I	-0.288	5	calcium channel, voltage-dependent, T type, alpha 1I subunit	Plasma Membrane	ion channel	NA	NA
UNC13A	-0.289	5	unc-13 homolog A (C. elegans)	Plasma Membrane	other	NA	NA
ZNF506	-0.289	5	zinc finger protein 506	Nucleus	other	NA	NA
DIRAS2	-0.289	5	DIRAS family, GTP-binding RAS-like 2	Plasma Membrane	enzyme	NA	NA
SNAPC3	-0.29	5	small nuclear RNA activating complex, polypeptide 3, 50kDa	Nucleus	other	NA	NA
LIPE	-0.29	5	lipase, hormone-sensitive	Cytoplasm	enzyme	NA	NA
ACSL6	-0.291	5	acyl-CoA synthetase long-chain family member 6	Cytoplasm	enzyme	NA	NA
SF3A1	-0.291	5	splicing factor 3a, subunit 1, 120kDa	Nucleus	other	NA	NA
IQSEC2	-0.291	5	IQ motif and Sec7 domain 2	Cytoplasm	other	NA	NA
GAB1	-0.291	5	GRB2-associated binding protein 1	Cytoplasm	other	NA	NA
RAPGEFL1	-0.291	5	Rap guanine nucleotide exchange factor (GEF)-like 1	unknown	other	NA	NA
JRK	-0.291	5	jerky homolog (mouse)	Nucleus	other	NA	NA
GCDH	-0.292	5	glutaryl-CoA dehydrogenase	Cytoplasm	enzyme	NA	NA
FAM211B	-0.292	5	family with sequence similarity 211, member B	unknown	other	NA	NA
ABCG2	-0.292	5	ATP-binding cassette, sub-family G (WHITE), member 2	Plasma Membrane	transporter	NA	NA
RAB5B	-0.293	5	RAB5B, member RAS oncogene family	Cytoplasm	enzyme	NA	NA
CBLN1	-0.294	5	cerebellin 1 precursor	Cytoplasm	other	NA	NA
PDK4	-0.294	5	pyruvate dehydrogenase kinase, isozyme 4	Cytoplasm	kinase	NA	NA
NTM	-0.294	5	neurotrimin	Plasma Membrane	other	NA	NA
LPCAT4	-0.294	5	lysophosphatidylcholine acyltransferase 4	Cytoplasm	enzyme	NA	NA
CKB	-0.295	5	creatine kinase, brain	Cytoplasm	kinase	Proneural	NA
PRKCE	-0.295	5	protein kinase C, epsilon	Cytoplasm	kinase	NA	NA
DICER1	-0.296	5	dicer 1, ribonuclease type III	Cytoplasm	enzyme	NA	NA
PHLPP2	-0.297	5	PH domain and leucine rich repeat protein phosphatase 2	Cytoplasm	enzyme	NA	NA
HRSP12	-0.298	5	heat-responsive protein 12	Cytoplasm	other	NA	NA
EHMT2	-0.298	5	euchromatic histone-lysine N-methyltransferase 2	Nucleus	transcription regulator	NA	NA
PPP1R12B	-0.298	5	protein phosphatase 1, regulatory subunit 12B	Cytoplasm	phosphatase	NA	NA
PRDM2	-0.298	5	PR domain containing 2, with ZNF domain	Nucleus	transcription regulator	NA	NA
HNRNPH3	-0.299	5	heterogeneous nuclear ribonucleoprotein H3 (2H9)	Nucleus	other	NA	NA
RUNDC3B	-0.299	5	RUN domain containing 3B	unknown	other	NA	NA
ATN1	-0.299	5	atrophin 1	Nucleus	transcription regulator	NA	NA
SLC29A3	-0.299	5	solute carrier family 29 (nucleoside transporters), member 3	Plasma Membrane	transporter	NA	NA
ANP32A	-0.299	5	acidic (leucine-rich) nuclear phosphoprotein 32 family, member A	Nucleus	other	NA	NA
TXN2	-0.3	5	thioredoxin 2	Cytoplasm	enzyme	NA	NA
LETMD1	-0.3	5	LETM1 domain containing 1	Plasma Membrane	other	NA	NA
OSGIN2	-0.301	5	oxidative stress induced growth inhibitor family member 2	unknown	other	NA	NA
SCN2B	-0.301	5	sodium channel, voltage-gated, type II, beta subunit	Plasma Membrane	ion channel	NA	NA
DDX17	-0.301	5	DEAD (Asp-Glu-Ala-Asp) box helicase 17	Nucleus	enzyme	NA	NA
SPTBN1	-0.301	5	spectrin, beta, non-erythrocytic 1	Plasma Membrane	other	NA	NA
HNRNPA1	-0.302	5	heterogeneous nuclear ribonucleoprotein A1	Nucleus	other	NA	NA
AARS	-0.302	5	alanyl-tRNA synthetase	Cytoplasm	enzyme	NA	NA
ADAP1	-0.302	5	ArfGAP with dual PH domains 1	Nucleus	other	NA	NA
BIN1	-0.302	5	bridging integrator 1	Nucleus	other	NA	NA
KCNC1	-0.302	5	potassium voltage-gated channel, Shaw-related subfamily, member 1	Plasma Membrane	ion channel	NA	NA
KIAA0368	-0.302	5	KIAA0368	Cytoplasm	other	NA	NA
LPIN1	-0.303	5	lipin 1	Nucleus	phosphatase	NA	NA
MICAL3	-0.303	5	microtubule associated monoxygenase, calponin and LIM domain containing 3	Cytoplasm	enzyme	NA	NA
TNR	-0.303	5	tenascin R	Plasma Membrane	other	NA	NA
BTRC	-0.303	5	beta-transducin repeat containing E3 ubiquitin protein ligase	Cytoplasm	enzyme	NA	NA
AP2B1	-0.304	5	adaptor-related protein complex 2, beta 1 subunit	Cytoplasm	transporter	NA	NA
NAP1L1	-0.304	5	nucleosome assembly protein 1-like 1	Nucleus	other	NA	NA
SCAMP5	-0.304	5	secretory carrier membrane protein 5	Cytoplasm	other	NA	NA
PINK1	-0.305	5	PTEN induced putative kinase 1	Cytoplasm	kinase	NA	NA
SLC1A2	-0.305	5	solute carrier family 1 (glial high affinity glutamate transporter), member 2	Plasma Membrane	transporter	NA	NA
HIC2	-0.306	5	hypermethylated in cancer 2	Nucleus	other	NA	NA
MAP4K5	-0.307	5	mitogen-activated protein kinase kinase kinase kinase 5	Cytoplasm	kinase	NA	NA
AGXT2L1	-0.307	5	alanine-glyoxylate aminotransferase 2-like 1	unknown	enzyme	Neural	NA
PLEKHB1	-0.307	5	pleckstrin homology domain containing, family B (evectins) member 1	Cytoplasm	other	NA	NA
ZNF276	-0.307	5	zinc finger protein 276	Nucleus	other	NA	NA
GMFB	-0.308	5	glia maturation factor, beta	Cytoplasm	growth factor	NA	NA
KIF13A	-0.308	5	kinesin family member 13A	Cytoplasm	transporter	NA	NA
KIAA1467	-0.309	5	KIAA1467	unknown	other	NA	NA
SLC1A6	-0.309	5	solute carrier family 1 (high affinity aspartate/glutamate transporter), member 6	Plasma Membrane	transporter	NA	NA
CLASP1	-0.31	5	cytoplasmic linker associated protein 1	Cytoplasm	other	NA	NA
RASSF2	-0.31	5	Ras association (RalGDS/AF-6) domain family member 2	Nucleus	other	NA	NA
ARHGAP19	-0.31	5	Rho GTPase activating protein 19	Cytoplasm	other	NA	NA
SPTAN1	-0.311	5	spectrin, alpha, non-erythrocytic 1	Plasma Membrane	other	NA	NA
LIMCH1	-0.312	5	LIM and calponin homology domains 1	unknown	other	NA	NA
HABP4	-0.312	5	hyaluronan binding protein 4	Cytoplasm	other	NA	NA
GABARAPL1	-0.312	5	GABA(A) receptor-associated protein like 1	Cytoplasm	other	NA	NA
TFEB	-0.312	5	transcription factor EB	Nucleus	transcription regulator	NA	NA
C10orf76	-0.312	5	chromosome 10 open reading frame 76	unknown	other	NA	NA
PPP1R9A	-0.313	5	protein phosphatase 1, regulatory subunit 9A	Plasma Membrane	other	NA	NA
CHKA	-0.313	5	choline kinase alpha	Cytoplasm	kinase	NA	NA
PDK2	-0.313	5	pyruvate dehydrogenase kinase, isozyme 2	Cytoplasm	kinase	NA	NA
SFTPB	-0.313	5	surfactant protein B	Extracellular Space	other	NA	NA
CYTH1	-0.313	5	cytohesin 1	Cytoplasm	other	Neural	NA
EPM2A	-0.314	5	epilepsy, progressive myoclonus type 2A, Lafora disease (laforin)	Cytoplasm	phosphatase	NA	NA
MCM3AP-AS1	-0.314	5	MCM3AP antisense RNA 1	unknown	other	NA	NA
RND1	-0.314	5	Rho family GTPase 1	Cytoplasm	enzyme	Neural	NA
THTPA	-0.315	5	thiamine triphosphatase	Cytoplasm	phosphatase	Neural	NA
PLA2G6	-0.315	5	phospholipase A2, group VI (cytosolic, calcium-independent)	Cytoplasm	enzyme	NA	NA
TMOD2	-0.316	5	tropomodulin 2 (neuronal)	Cytoplasm	other	NA	NA
CHD7	-0.317	5	chromodomain helicase DNA binding protein 7	Nucleus	enzyme	Proneural	NA
DDX25	-0.317	5	DEAD (Asp-Glu-Ala-Asp) box helicase 25	Nucleus	enzyme	NA	NA
PIAS1	-0.317	5	protein inhibitor of activated STAT, 1	Nucleus	transcription regulator	NA	NA
RIMS2	-0.317	5	regulating synaptic membrane exocytosis 2	Plasma Membrane	other	NA	NA
AKAP11	-0.318	5	A kinase (PRKA) anchor protein 11	Cytoplasm	other	NA	NA
BSN	-0.318	5	bassoon (presynaptic cytomatrix protein)	Plasma Membrane	other	NA	NA
CAMK2G	-0.319	5	calcium/calmodulin-dependent protein kinase II gamma	Cytoplasm	kinase	Neural	NA
ATP5S	-0.32	5	ATP synthase, H+ transporting, mitochondrial Fo complex, subunit s (factor B)	Cytoplasm	transporter	NA	NA
TSC22D4	-0.32	5	TSC22 domain family, member 4	Nucleus	transcription regulator	NA	NA
FOXO3	-0.322	5	forkhead box O3	Nucleus	transcription regulator	NA	NA
ANKRD28	-0.322	5	ankyrin repeat domain 28	Cytoplasm	other	NA	NA
HEY2	-0.322	5	hairy/enhancer-of-split related with YRPW motif 2	Nucleus	transcription regulator	NA	NA
C11orf68	-0.322	5	chromosome 11 open reading frame 68	unknown	other	NA	NA
N4BP2L1	-0.322	5	NEDD4 binding protein 2-like 1	unknown	other	NA	NA
RPL7	-0.323	5	ribosomal protein L7	Nucleus	transcription regulator	NA	NA
LHPP	-0.323	5	phospholysine phosphohistidine inorganic pyrophosphate phosphatase	Cytoplasm	phosphatase	NA	NA
KAT7	-0.323	5	K(lysine) acetyltransferase 7	Nucleus	enzyme	NA	NA
MUM1	-0.324	5	melanoma associated antigen (mutated) 1	Nucleus	other	NA	NA
SPTBN2	-0.325	5	spectrin, beta, non-erythrocytic 2	Cytoplasm	other	Proneural	NA
KLC1	-0.327	5	kinesin light chain 1	Cytoplasm	other	NA	NA
CXorf1	-0.328	5	chromosome X open reading frame 1	unknown	other	NA	NA
DHRS9	-0.328	5	dehydrogenase/reductase (SDR family) member 9	Cytoplasm	enzyme	Neural	NA
P2RX7	-0.329	5	purinergic receptor P2X, ligand-gated ion channel, 7	Plasma Membrane	ion channel	Proneural	NA
JPH3	-0.33	5	junctophilin 3	Plasma Membrane	ion channel	NA	NA
CDR1	-0.331	5	cerebellar degeneration-related protein 1, 34kDa	unknown	other	Neural	NA
PFKM	-0.331	5	phosphofructokinase, muscle	Cytoplasm	kinase	NA	NA
NHP2L1	-0.332	5	NHP2 non-histone chromosome protein 2-like 1 (S. cerevisiae)	Nucleus	other	NA	NA
CHD8	-0.332	5	chromodomain helicase DNA binding protein 8	Nucleus	enzyme	NA	NA
TSPYL2	-0.333	5	TSPY-like 2	Nucleus	other	NA	NA
IL1RAPL1	-0.333	5	interleukin 1 receptor accessory protein-like 1	Plasma Membrane	transmembrane receptor	Proneural	NA
CRYAB	-0.334	5	crystallin, alpha B	Nucleus	other	NA	NA
PPP3CB	-0.335	5	protein phosphatase 3, catalytic subunit, beta isozyme	Plasma Membrane	phosphatase	NA	NA
BID	-0.335	5	BH3 interacting domain death agonist	Cytoplasm	other	NA	NA
CUEDC2	-0.336	5	CUE domain containing 2	Extracellular Space	other	NA	NA
BRD3	-0.336	5	bromodomain containing 3	Nucleus	kinase	NA	NA
GYPB	-0.337	5	glycophorin B (MNS blood group)	Plasma Membrane	other	NA	NA
FAM190B	-0.337	5	family with sequence similarity 190, member B	unknown	other	NA	NA
GLP1R	-0.338	5	glucagon-like peptide 1 receptor	Plasma Membrane	G-protein coupled receptor	NA	NA
VPS13D	-0.338	5	vacuolar protein sorting 13 homolog D (S. cerevisiae)	unknown	other	NA	NA
MBIP	-0.339	5	MAP3K12 binding inhibitory protein 1	Nucleus	other	NA	NA
ALDH2	-0.34	5	aldehyde dehydrogenase 2 family (mitochondrial)	Cytoplasm	enzyme	NA	NA
HSPA12A	-0.34	5	heat shock 70kDa protein 12A	unknown	other	NA	NA
RPS24	-0.341	5	ribosomal protein S24	Cytoplasm	other	NA	NA
RERE	-0.341	5	arginine-glutamic acid dipeptide (RE) repeats	Nucleus	other	NA	NA
ARAP2	-0.341	5	ArfGAP with RhoGAP domain, ankyrin repeat and PH domain 2	Cytoplasm	other	NA	NA
TMEM100	-0.341	5	transmembrane protein 100	unknown	other	NA	NA
PATZ1	-0.341	5	POZ (BTB) and AT hook containing zinc finger 1	Nucleus	transcription regulator	NA	NA
BMP2	-0.341	5	bone morphogenetic protein 2	Extracellular Space	growth factor	NA	NA
SLC25A28	-0.341	5	solute carrier family 25 (mitochondrial iron transporter), member 28	Cytoplasm	other	NA	NA
RAP2A	-0.342	5	RAP2A, member of RAS oncogene family	Plasma Membrane	enzyme	Proneural	NA
DNAJB12	-0.342	5	DnaJ (Hsp40) homolog, subfamily B, member 12	Cytoplasm	other	NA	NA
ZBTB16	-0.342	5	zinc finger and BTB domain containing 16	Nucleus	transcription regulator	NA	NA
SDPR	-0.342	5	serum deprivation response	Plasma Membrane	other	NA	NA
GCLC	-0.344	5	glutamate-cysteine ligase, catalytic subunit	Cytoplasm	enzyme	NA	NA
FAIM2	-0.344	5	Fas apoptotic inhibitory molecule 2	Plasma Membrane	other	NA	NA
C5orf4	-0.345	5	chromosome 5 open reading frame 4	unknown	other	NA	NA
GRIA4	-0.346	5	glutamate receptor, ionotropic, AMPA 4	Plasma Membrane	ion channel	NA	NA
KLHL25	-0.346	5	kelch-like 25 (Drosophila)	Cytoplasm	other	Classical	NA
PAQR6	-0.346	5	progestin and adipoQ receptor family member VI	unknown	other	NA	NA
PIK3IP1	-0.347	5	phosphoinositide-3-kinase interacting protein 1	unknown	other	NA	NA
SNX1	-0.348	5	sorting nexin 1	Cytoplasm	transporter	NA	NA
KLRC3	-0.348	5	killer cell lectin-like receptor subfamily C, member 3	Plasma Membrane	transmembrane receptor	Proneural	Proneural
FERMT1	-0.348	5	fermitin family member 1	Plasma Membrane	other	NA	NA
CALCOCO1	-0.348	5	calcium binding and coiled-coil domain 1	Nucleus	transcription regulator	NA	NA
PIK3R1	-0.349	5	phosphoinositide-3-kinase, regulatory subunit 1 (alpha)	Cytoplasm	kinase	NA	NA
SIRT1	-0.349	5	sirtuin 1	Nucleus	transcription regulator	NA	NA
AP3S2	-0.35	5	adaptor-related protein complex 3, sigma 2 subunit	Cytoplasm	transporter	NA	NA
CUTC	-0.35	5	cutC copper transporter homolog (E. coli)	Cytoplasm	other	Neural	NA
ASCC1	-0.35	5	activating signal cointegrator 1 complex subunit 1	Nucleus	transcription regulator	NA	NA
PAAF1	-0.351	5	proteasomal ATPase-associated factor 1	unknown	other	NA	NA
TCF7L2	-0.351	5	transcription factor 7-like 2 (T-cell specific, HMG-box)	Nucleus	transcription regulator	NA	NA
ADD3	-0.352	5	adducin 3 (gamma)	Cytoplasm	other	Neural	NA
GPHN	-0.352	5	gephyrin	Plasma Membrane	enzyme	NA	NA
ADARB2	-0.352	5	adenosine deaminase, RNA-specific, B2	Nucleus	enzyme	NA	NA
RAB11FIP2	-0.353	5	RAB11 family interacting protein 2 (class I)	Cytoplasm	other	NA	NA
WBP2	-0.355	5	WW domain binding protein 2	Cytoplasm	other	NA	NA
PDCD4	-0.356	5	programmed cell death 4 (neoplastic transformation inhibitor)	Nucleus	other	NA	NA
ELMO1	-0.358	5	engulfment and cell motility 1	Cytoplasm	other	NA	NA
OTUB1	-0.358	5	OTU domain, ubiquitin aldehyde binding 1	Cytoplasm	enzyme	NA	NA
TMEM59L	-0.36	5	transmembrane protein 59-like	Cytoplasm	other	NA	NA
NCOA4	-0.361	5	nuclear receptor coactivator 4	Nucleus	transcription regulator	NA	NA
SESN1	-0.361	5	sestrin 1	Nucleus	other	NA	NA
GNAL	-0.362	5	guanine nucleotide binding protein (G protein), alpha activating activity polypeptide, olfactory type	Cytoplasm	enzyme	NA	NA
SGMS1	-0.363	5	sphingomyelin synthase 1	Cytoplasm	enzyme	NA	NA
HDAC5	-0.363	5	histone deacetylase 5	Nucleus	transcription regulator	NA	NA
ATG13	-0.368	5	autophagy related 13	Cytoplasm	other	NA	NA
ARID4A	-0.371	5	AT rich interactive domain 4A (RBP1-like)	Nucleus	transcription regulator	NA	NA
DENND5A	-0.371	5	DENN/MADD domain containing 5A	Cytoplasm	other	NA	NA
PNMA1	-0.371	5	paraneoplastic Ma antigen 1	Nucleus	other	NA	NA
SMAD9	-0.375	5	SMAD family member 9	Nucleus	transcription regulator	NA	NA
GRAMD1B	-0.376	5	GRAM domain containing 1B	unknown	other	NA	NA
CSNK1E	-0.377	5	casein kinase 1, epsilon	Cytoplasm	kinase	Proneural	NA
LUZP2	-0.381	5	leucine zipper protein 2	unknown	other	NA	NA
DHTKD1	-0.381	5	dehydrogenase E1 and transketolase domain containing 1	unknown	enzyme	NA	NA
CPEB3	-0.382	5	cytoplasmic polyadenylation element binding protein 3	Plasma Membrane	other	NA	NA
USH1C	-0.383	5	Usher syndrome 1C (autosomal recessive, severe)	Cytoplasm	other	NA	NA
MTPAP	-0.385	5	mitochondrial poly(A) polymerase	Cytoplasm	enzyme	NA	NA
HPSE2	-0.389	5	heparanase 2	unknown	enzyme	NA	NA
FAM192A	-0.392	5	family with sequence similarity 192, member A	Nucleus	other	NA	NA
EIF4ENIF1	-0.392	5	eukaryotic translation initiation factor 4E nuclear import factor 1	Cytoplasm	translation regulator	NA	NA
LDHB	-0.393	5	lactate dehydrogenase B	Cytoplasm	enzyme	NA	NA
CRY2	-0.393	5	cryptochrome 2 (photolyase-like)	Nucleus	enzyme	NA	NA
PHLPP1	-0.397	5	PH domain and leucine rich repeat protein phosphatase 1	Cytoplasm	enzyme	NA	NA
SIK3	-0.398	5	SIK family kinase 3	unknown	kinase	NA	NA
SAP18	-0.399	5	Sin3A-associated protein, 18kDa	Nucleus	transcription regulator	NA	NA
FDFT1	-0.402	5	farnesyl-diphosphate farnesyltransferase 1	Cytoplasm	enzyme	NA	NA
ABI1	-0.402	5	abl-interactor 1	Cytoplasm	other	NA	NA
MXI1	-0.41	5	MAX interactor 1	Nucleus	transcription regulator	NA	NA
ARFGAP2	-0.411	5	ADP-ribosylation factor GTPase activating protein 2	Nucleus	other	NA	NA
TMEM158	0.446	4	transmembrane protein 158 (gene/pseudogene)	Plasma Membrane	other	NA	NA
MGAT4B	0.445	4	mannosyl (alpha-1,3-)-glycoprotein beta-1,4-N-acetylglucosaminyltransferase, isozyme B	Cytoplasm	enzyme	NA	NA
FLNA	0.431	4	filamin A, alpha	Cytoplasm	other	NA	NA
HSPB1	0.43	4	heat shock 27kDa protein 1	Cytoplasm	other	NA	NA
SLC27A3	0.428	4	solute carrier family 27 (fatty acid transporter), member 3	Cytoplasm	transporter	NA	NA
VKORC1	0.426	4	vitamin K epoxide reductase complex, subunit 1	Cytoplasm	enzyme	NA	NA
DNAJB1	0.414	4	DnaJ (Hsp40) homolog, subfamily B, member 1	Nucleus	other	NA	NA
LSP1	0.41	4	lymphocyte-specific protein 1	Cytoplasm	other	NA	NA
PPP1R15A	0.397	4	protein phosphatase 1, regulatory subunit 15A	Cytoplasm	other	NA	NA
CUL7	0.396	4	cullin 7	Cytoplasm	other	NA	NA
BGN	0.395	4	biglycan	Extracellular Space	other	NA	NA
COL6A2	0.395	4	collagen, type VI, alpha 2	Extracellular Space	other	NA	NA
EMC3	0.391	4	ER membrane protein complex subunit 3	unknown	other	NA	NA
TYMP	0.389	4	thymidine phosphorylase	Extracellular Space	growth factor	NA	NA
EMILIN1	0.388	4	elastin microfibril interfacer 1	Extracellular Space	other	NA	NA
BIRC3	0.388	4	baculoviral IAP repeat containing 3	Cytoplasm	enzyme	NA	NA
PLOD1	0.386	4	procollagen-lysine, 2-oxoglutarate 5-dioxygenase 1	Cytoplasm	enzyme	NA	NA
PLAT	0.385	4	plasminogen activator, tissue	Extracellular Space	peptidase	NA	NA
COL4A2	0.384	4	collagen, type IV, alpha 2	Extracellular Space	other	NA	Mesenchymal
GALNT2	0.383	4	UDP-N-acetyl-alpha-D-galactosamine:polypeptide N-acetylgalactosaminyltransferase 2 (GalNAc-T2)	Cytoplasm	enzyme	NA	NA
UBL4A	0.382	4	ubiquitin-like 4A	Cytoplasm	enzyme	NA	NA
PTRF	0.381	4	polymerase I and transcript release factor	Nucleus	transcription regulator	Mesenchymal	NA
PLIN2	0.381	4	perilipin 2	Plasma Membrane	other	NA	NA
RRM1	0.38	4	ribonucleotide reductase M1	Nucleus	enzyme	NA	NA
KLHDC8A	0.377	4	kelch domain containing 8A	unknown	other	Classical	NA
SIL1	0.377	4	SIL1 homolog, endoplasmic reticulum chaperone (S. cerevisiae)	Cytoplasm	transporter	NA	NA
YIPF1	0.376	4	Yip1 domain family, member 1	Cytoplasm	other	NA	NA
MICALL2	0.375	4	MICAL-like 2	Cytoplasm	other	NA	NA
TUBB4B	0.373	4	tubulin, beta 4B class IVb	Cytoplasm	other	NA	NA
ADAM12	0.371	4	ADAM metallopeptidase domain 12	Plasma Membrane	peptidase	Mesenchymal	NA
OAZ1	0.371	4	ornithine decarboxylase antizyme 1	Cytoplasm	enzyme	NA	NA
LUM	0.37	4	lumican	Extracellular Space	other	NA	NA
MRC2	0.37	4	mannose receptor, C type 2	Plasma Membrane	transmembrane receptor	Mesenchymal	NA
TACC3	0.369	4	transforming, acidic coiled-coil containing protein 3	Nucleus	other	NA	NA
TMED9	0.368	4	transmembrane emp24 protein transport domain containing 9	Cytoplasm	transporter	NA	NA
GALNS	0.367	4	galactosamine (N-acetyl)-6-sulfate sulfatase	Cytoplasm	enzyme	NA	NA
MAD2L1	0.367	4	MAD2 mitotic arrest deficient-like 1 (yeast)	Nucleus	other	NA	NA
SDF4	0.367	4	stromal cell derived factor 4	Cytoplasm	other	NA	NA
PSMD2	0.367	4	proteasome (prosome, macropain) 26S subunit, non-ATPase, 2	Cytoplasm	other	NA	NA
TCIRG1	0.366	4	T-cell, immune regulator 1, ATPase, H+ transporting, lysosomal V0 subunit A3	Plasma Membrane	enzyme	Mesenchymal	NA
HILPDA	0.366	4	hypoxia inducible lipid droplet-associated	Cytoplasm	other	NA	NA
ZAK	0.366	4	sterile alpha motif and leucine zipper containing kinase AZK	Cytoplasm	kinase	NA	NA
TNIP1	0.364	4	TNFAIP3 interacting protein 1	Nucleus	other	NA	NA
MFSD10	0.363	4	major facilitator superfamily domain containing 10	unknown	transporter	NA	NA
EMR2	0.357	4	egf-like module containing, mucin-like, hormone receptor-like 2	Plasma Membrane	G-protein coupled receptor	NA	NA
ALOX5AP	0.355	4	arachidonate 5-lipoxygenase-activating protein	Plasma Membrane	other	NA	NA
LRRC42	0.355	4	leucine rich repeat containing 42	unknown	other	NA	NA
SLC2A3	0.354	4	solute carrier family 2 (facilitated glucose transporter), member 3	Plasma Membrane	transporter	NA	NA
NUP54	0.354	4	nucleoporin 54kDa	Nucleus	transporter	NA	NA
NSUN5	0.353	4	NOP2/Sun domain family, member 5	unknown	other	NA	NA
APEX2	0.353	4	APEX nuclease (apurinic/apyrimidinic endonuclease) 2	Nucleus	enzyme	NA	NA
BCL3	0.353	4	B-cell CLL/lymphoma 3	Nucleus	transcription regulator	NA	NA
MX1	0.353	4	myxovirus (influenza virus) resistance 1, interferon-inducible protein p78 (mouse)	Nucleus	enzyme	NA	NA
FEN1	0.351	4	flap structure-specific endonuclease 1	Nucleus	enzyme	NA	NA
C21orf7	0.351	4	chromosome 21 open reading frame 7	unknown	other	NA	NA
HOXD10	0.35	4	homeobox D10	Nucleus	transcription regulator	NA	NA
RIF1	0.35	4	RAP1 interacting factor homolog (yeast)	Nucleus	other	NA	NA
CD63	0.349	4	CD63 molecule	Plasma Membrane	other	NA	NA
CBR1	0.349	4	carbonyl reductase 1	Cytoplasm	enzyme	NA	NA
CTNNA1	0.348	4	catenin (cadherin-associated protein), alpha 1, 102kDa	Plasma Membrane	other	NA	NA
TK1	0.348	4	thymidine kinase 1, soluble	Cytoplasm	kinase	NA	NA
TLR1	0.348	4	toll-like receptor 1	Plasma Membrane	transmembrane receptor	NA	NA
SNX7	0.348	4	sorting nexin 7	unknown	transporter	NA	NA
ATP13A3	0.347	4	ATPase type 13A3	Extracellular Space	transporter	NA	NA
BIN3	0.347	4	bridging integrator 3	Cytoplasm	other	NA	NA
RAD54B	0.347	4	RAD54 homolog B (S. cerevisiae)	Nucleus	enzyme	NA	NA
ICAM1	0.346	4	intercellular adhesion molecule 1	Plasma Membrane	transmembrane receptor	NA	NA
PLXND1	0.346	4	plexin D1	Plasma Membrane	transmembrane receptor	NA	NA
PFN1	0.345	4	profilin 1	Cytoplasm	other	NA	NA
HSPG2	0.345	4	heparan sulfate proteoglycan 2	Plasma Membrane	enzyme	NA	NA
FZD7	0.345	4	frizzled family receptor 7	Plasma Membrane	G-protein coupled receptor	Classical	NA
BDKRB2	0.345	4	bradykinin receptor B2	Plasma Membrane	G-protein coupled receptor	Mesenchymal	NA
FCGR2C	0.344	4	Fc fragment of IgG, low affinity IIc, receptor for (CD32) (gene/pseudogene)	Plasma Membrane	transmembrane receptor	NA	NA
ITGB1	0.343	4	integrin, beta 1 (fibronectin receptor, beta polypeptide, antigen CD29 includes MDF2, MSK12)	Plasma Membrane	transmembrane receptor	NA	NA
DIRAS3	0.343	4	DIRAS family, GTP-binding RAS-like 3	Plasma Membrane	enzyme	NA	NA
ZNF468	0.343	4	zinc finger protein 468	unknown	other	NA	NA
ANXA5	0.342	4	annexin A5	Plasma Membrane	other	Classical	NA
JUN	0.342	4	jun proto-oncogene	Nucleus	transcription regulator	NA	NA
MAP3K6	0.342	4	mitogen-activated protein kinase kinase kinase 6	unknown	kinase	NA	NA
CCL20	0.34	4	chemokine (C-C motif) ligand 20	Extracellular Space	cytokine	NA	NA
ARAP3	0.34	4	ArfGAP with RhoGAP domain, ankyrin repeat and PH domain 3	Nucleus	other	Classical	NA
MMP14	0.339	4	matrix metallopeptidase 14 (membrane-inserted)	Extracellular Space	peptidase	NA	NA
PDIA3	0.339	4	protein disulfide isomerase family A, member 3	Cytoplasm	peptidase	NA	NA
TRIM36	0.339	4	tripartite motif containing 36	Cytoplasm	other	NA	NA
SERPINA3	0.337	4	serpin peptidase inhibitor, clade A (alpha-1 antiproteinase, antitrypsin), member 3	Extracellular Space	other	NA	NA
HTATIP2	0.337	4	HIV-1 Tat interactive protein 2, 30kDa	Nucleus	transcription regulator	NA	NA
MDM1	0.337	4	Mdm1 nuclear protein homolog (mouse)	unknown	other	NA	NA
PTTG3P	0.336	4	pituitary tumor-transforming 3, pseudogene	unknown	other	NA	NA
SRSF7	0.335	4	serine/arginine-rich splicing factor 7	Nucleus	other	NA	NA
TPST1	0.335	4	tyrosylprotein sulfotransferase 1	Cytoplasm	enzyme	NA	NA
S100A13	0.335	4	S100 calcium binding protein A13	Cytoplasm	other	Mesenchymal	NA
FOXM1	0.334	4	forkhead box M1	Nucleus	transcription regulator	NA	NA
XAF1	0.334	4	XIAP associated factor 1	Nucleus	other	NA	NA
MSR1	0.334	4	macrophage scavenger receptor 1	Plasma Membrane	transmembrane receptor	Mesenchymal	NA
ADIPOR1	0.334	4	adiponectin receptor 1	Plasma Membrane	transmembrane receptor	NA	NA
CBX8	0.334	4	chromobox homolog 8	Nucleus	other	NA	NA
SRPRB	0.334	4	signal recognition particle receptor, B subunit	Cytoplasm	other	NA	NA
HIST1H2BH/HIST1H2BO	0.334	4	histone cluster 1, H2bo	Nucleus	other	NA	NA
RNASE2	0.333	4	ribonuclease, RNase A family, 2 (liver, eosinophil-derived neurotoxin)	Cytoplasm	enzyme	NA	NA
LAMB2	0.333	4	laminin, beta 2 (laminin S)	Extracellular Space	enzyme	Classical	NA
RNPEP	0.333	4	arginyl aminopeptidase (aminopeptidase B)	Cytoplasm	peptidase	NA	NA
TPI1	0.333	4	triosephosphate isomerase 1	Cytoplasm	enzyme	NA	NA
SFT2D2	0.332	4	SFT2 domain containing 2	unknown	other	Mesenchymal	NA
CHRNA9	0.331	4	cholinergic receptor, nicotinic, alpha 9 (neuronal)	Plasma Membrane	transmembrane receptor	NA	NA
DPM1	0.331	4	dolichyl-phosphate mannosyltransferase polypeptide 1, catalytic subunit	Cytoplasm	enzyme	NA	NA
COL6A1	0.33	4	collagen, type VI, alpha 1	Extracellular Space	other	NA	NA
MTCP1NB	0.33	4	mature T-cell proliferation 1 neighbor	Cytoplasm	other	NA	NA
WARS	0.329	4	tryptophanyl-tRNA synthetase	Cytoplasm	enzyme	NA	NA
GMPS	0.329	4	guanine monphosphate synthetase	Nucleus	enzyme	NA	NA
TRA2B	0.328	4	transformer 2 beta homolog (Drosophila)	Nucleus	other	NA	NA
ITGA5	0.328	4	integrin, alpha 5 (fibronectin receptor, alpha polypeptide)	Plasma Membrane	other	Mesenchymal	NA
ATP1B3	0.328	4	ATPase, Na+/K+ transporting, beta 3 polypeptide	Plasma Membrane	transporter	NA	NA
ISOC1	0.328	4	isochorismatase domain containing 1	Cytoplasm	enzyme	NA	NA
SLC2A4RG	0.327	4	SLC2A4 regulator	Cytoplasm	transcription regulator	NA	NA
SLC16A10	0.327	4	solute carrier family 16, member 10 (aromatic amino acid transporter)	Plasma Membrane	transporter	NA	NA
YTHDF2	0.327	4	YTH domain family, member 2	unknown	other	NA	NA
IARS2	0.327	4	isoleucyl-tRNA synthetase 2, mitochondrial	Cytoplasm	enzyme	NA	NA
ANGPT2	0.326	4	angiopoietin 2	Extracellular Space	growth factor	NA	NA
NCAPH	0.326	4	non-SMC condensin I complex, subunit H	Nucleus	other	NA	NA
ADAMTS1	0.326	4	ADAM metallopeptidase with thrombospondin type 1 motif, 1	Extracellular Space	peptidase	NA	NA
PSMB3	0.326	4	proteasome (prosome, macropain) subunit, beta type, 3	Cytoplasm	peptidase	NA	NA
SLC4A2	0.325	4	solute carrier family 4, anion exchanger, member 2 (erythrocyte membrane protein band 3-like 1)	Plasma Membrane	transporter	NA	NA
CDC42EP3	0.325	4	CDC42 effector protein (Rho GTPase binding) 3	Cytoplasm	other	NA	NA
IRAK4	0.325	4	interleukin-1 receptor-associated kinase 4	Cytoplasm	kinase	NA	NA
SPATS2L	0.324	4	spermatogenesis associated, serine-rich 2-like	unknown	other	NA	NA
TMEM127	0.324	4	transmembrane protein 127	unknown	other	NA	NA
EIF4G2	0.324	4	eukaryotic translation initiation factor 4 gamma, 2	Cytoplasm	translation regulator	NA	NA
AFP	0.323	4	alpha-fetoprotein	Extracellular Space	transporter	NA	NA
STT3A	0.323	4	STT3, subunit of the oligosaccharyltransferase complex, homolog A (S. cerevisiae)	Plasma Membrane	enzyme	NA	NA
ZYX	0.322	4	zyxin	Plasma Membrane	other	NA	NA
CD302	0.322	4	CD302 molecule	Plasma Membrane	transmembrane receptor	NA	NA
TXNDC5	0.322	4	thioredoxin domain containing 5 (endoplasmic reticulum)	Cytoplasm	enzyme	NA	NA
ISG20	0.321	4	interferon stimulated exonuclease gene 20kDa	Nucleus	enzyme	NA	NA
RGN	0.321	4	regucalcin (senescence marker protein-30)	Nucleus	enzyme	NA	NA
C17orf75	0.321	4	chromosome 17 open reading frame 75	Extracellular Space	other	NA	NA
TTK	0.321	4	TTK protein kinase	Nucleus	kinase	NA	NA
ZNF200	0.321	4	zinc finger protein 200	Nucleus	other	NA	NA
SUMO3	0.321	4	SMT3 suppressor of mif two 3 homolog 3 (S. cerevisiae)	Nucleus	other	NA	NA
GMPPB	0.32	4	GDP-mannose pyrophosphorylase B	Cytoplasm	enzyme	NA	NA
FAM86A/FAM86B1	0.32	4	family with sequence similarity 86, member A	unknown	other	NA	NA
SNIP1	0.32	4	Smad nuclear interacting protein 1	Nucleus	other	NA	NA
NPC2	0.319	4	Niemann-Pick disease, type C2	Extracellular Space	other	Mesenchymal	NA
CTSC	0.319	4	cathepsin C	Cytoplasm	peptidase	Mesenchymal	NA
EHBP1L1	0.319	4	EH domain binding protein 1-like 1	Cytoplasm	other	NA	NA
ALG3	0.319	4	asparagine-linked glycosylation 3, alpha-1,3- mannosyltransferase homolog (S. cerevisiae)	Cytoplasm	enzyme	NA	NA
CCT8	0.319	4	chaperonin containing TCP1, subunit 8 (theta)	Cytoplasm	enzyme	NA	NA
SLC38A6	0.319	4	solute carrier family 38, member 6	unknown	transporter	NA	NA
ESYT1	0.318	4	extended synaptotagmin-like protein 1	unknown	other	NA	NA
C8orf4	0.318	4	chromosome 8 open reading frame 4	unknown	other	NA	NA
PIR	0.318	4	pirin (iron-binding nuclear protein)	Nucleus	transcription regulator	NA	NA
MAPK13	0.317	4	mitogen-activated protein kinase 13	Cytoplasm	kinase	Mesenchymal	NA
SLFN12	0.317	4	schlafen family member 12	Nucleus	enzyme	NA	NA
RRAS	0.317	4	related RAS viral (r-ras) oncogene homolog	Cytoplasm	enzyme	Mesenchymal	NA
MMRN1	0.317	4	multimerin 1	Extracellular Space	other	NA	NA
TMEM140	0.316	4	transmembrane protein 140	unknown	other	NA	NA
HCP5	0.314	4	HLA complex P5 (non-protein coding)	unknown	other	NA	NA
LAIR1	0.314	4	leukocyte-associated immunoglobulin-like receptor 1	Plasma Membrane	transmembrane receptor	Mesenchymal	NA
HLA-DRA	0.314	4	major histocompatibility complex, class II, DR alpha	Plasma Membrane	transmembrane receptor	NA	NA
FLII	0.314	4	flightless I homolog (Drosophila)	Nucleus	other	NA	NA
C2orf56	0.314	4	chromosome 2 open reading frame 56	Cytoplasm	other	NA	NA
SRSF9	0.314	4	serine/arginine-rich splicing factor 9	Nucleus	enzyme	NA	NA
GPX1	0.313	4	glutathione peroxidase 1	Cytoplasm	enzyme	NA	NA
TAF12	0.313	4	TAF12 RNA polymerase II, TATA box binding protein (TBP)-associated factor, 20kDa	Nucleus	transcription regulator	NA	NA
FH	0.313	4	fumarate hydratase	Cytoplasm	enzyme	NA	NA
RAMP3	0.312	4	receptor (G protein-coupled) activity modifying protein 3	Plasma Membrane	transporter	NA	NA
STX3	0.312	4	syntaxin 3	Plasma Membrane	transporter	NA	NA
CD300A	0.312	4	CD300a molecule	Plasma Membrane	transmembrane receptor	NA	NA
GLT25D1	0.312	4	glycosyltransferase 25 domain containing 1	Cytoplasm	other	Mesenchymal	NA
HIST2H2BE (includes others)	0.312	4	histone cluster 2, H2be	Nucleus	other	NA	NA
ARF6	0.312	4	ADP-ribosylation factor 6	Plasma Membrane	transporter	NA	NA
MAN2B1	0.311	4	mannosidase, alpha, class 2B, member 1	Cytoplasm	enzyme	Mesenchymal	NA
MCM4	0.311	4	minichromosome maintenance complex component 4	Nucleus	enzyme	NA	NA
LYPLA1	0.311	4	lysophospholipase I	Cytoplasm	enzyme	NA	NA
ATG4A	0.311	4	autophagy related 4A, cysteine peptidase	Cytoplasm	peptidase	NA	NA
CXCR7	0.311	4	chemokine (C-X-C motif) receptor 7	Plasma Membrane	G-protein coupled receptor	NA	NA
BST1	0.311	4	bone marrow stromal cell antigen 1	Plasma Membrane	enzyme	NA	NA
WRN	0.311	4	Werner syndrome, RecQ helicase-like	Nucleus	enzyme	NA	NA
KDELR1	0.31	4	KDEL (Lys-Asp-Glu-Leu) endoplasmic reticulum protein retention receptor 1	Cytoplasm	transporter	NA	NA
CD14	0.31	4	CD14 molecule	Plasma Membrane	transmembrane receptor	Mesenchymal	NA
TMEM51	0.31	4	transmembrane protein 51	unknown	other	NA	NA
NUP205	0.31	4	nucleoporin 205kDa	Nucleus	other	NA	NA
DALRD3	0.31	4	DALR anticodon binding domain containing 3	unknown	other	NA	NA
BUB1B	0.31	4	budding uninhibited by benzimidazoles 1 homolog beta (yeast)	Nucleus	kinase	NA	NA
SCUBE2	0.31	4	signal peptide, CUB domain, EGF-like 2	Extracellular Space	other	NA	NA
COL15A1	0.309	4	collagen, type XV, alpha 1	Extracellular Space	other	NA	NA
FCER1G	0.309	4	Fc fragment of IgE, high affinity I, receptor for; gamma polypeptide	Plasma Membrane	transmembrane receptor	NA	NA
NDUFS6	0.309	4	NADH dehydrogenase (ubiquinone) Fe-S protein 6, 13kDa (NADH-coenzyme Q reductase)	Cytoplasm	enzyme	NA	NA
MTERFD1	0.309	4	MTERF domain containing 1	Cytoplasm	other	NA	NA
CENPN	0.309	4	centromere protein N	unknown	other	NA	NA
PCK2	0.308	4	phosphoenolpyruvate carboxykinase 2 (mitochondrial)	Cytoplasm	kinase	NA	NA
SPAG5	0.308	4	sperm associated antigen 5	Nucleus	peptidase	NA	NA
SPP1	0.308	4	secreted phosphoprotein 1	Extracellular Space	cytokine	NA	NA
HIST1H2BJ/HIST1H2BK	0.308	4	histone cluster 1, H2bk	Nucleus	other	NA	NA
SDF2L1	0.307	4	stromal cell-derived factor 2-like 1	Cytoplasm	other	NA	NA
DUSP10	0.307	4	dual specificity phosphatase 10	Nucleus	phosphatase	NA	NA
ACP6	0.307	4	acid phosphatase 6, lysophosphatidic	Cytoplasm	phosphatase	NA	NA
RDH14	0.307	4	retinol dehydrogenase 14 (all-trans/9-cis/11-cis)	Cytoplasm	enzyme	NA	NA
TRIM21	0.306	4	tripartite motif containing 21	Nucleus	enzyme	NA	NA
TMEM110	0.306	4	transmembrane protein 110	unknown	other	NA	NA
ATP6V0B	0.306	4	ATPase, H+ transporting, lysosomal 21kDa, V0 subunit b	Cytoplasm	transporter	NA	NA
TUBA1C	0.306	4	tubulin, alpha 1c	Cytoplasm	other	NA	NA
RUVBL1	0.306	4	RuvB-like 1 (E. coli)	Nucleus	transcription regulator	NA	NA
ZNF12	0.306	4	zinc finger protein 12	Nucleus	transcription regulator	NA	NA
ITGB2	0.305	4	integrin, beta 2 (complement component 3 receptor 3 and 4 subunit)	Plasma Membrane	other	Mesenchymal	NA
ATP11B	0.305	4	ATPase, class VI, type 11B	Plasma Membrane	transporter	NA	NA
MGST2	0.305	4	microsomal glutathione S-transferase 2	Cytoplasm	enzyme	Mesenchymal	NA
PLS3	0.305	4	plastin 3	Cytoplasm	other	Mesenchymal	NA
FAM18B1	0.305	4	family with sequence similarity 18, member B1	unknown	other	NA	NA
TMPO	0.304	4	thymopoietin	Nucleus	other	NA	NA
SCO2	0.304	4	SCO cytochrome oxidase deficient homolog 2 (yeast)	Cytoplasm	other	NA	NA
SLC52A2	0.304	4	solute carrier family 52, riboflavin transporter, member 2	Plasma Membrane	other	NA	NA
TTC27	0.304	4	tetratricopeptide repeat domain 27	unknown	other	NA	NA
EIF2AK3	0.304	4	eukaryotic translation initiation factor 2-alpha kinase 3	Cytoplasm	kinase	NA	NA
MTCH2	0.304	4	mitochondrial carrier 2	Cytoplasm	other	NA	NA
HLA-DPA1	0.303	4	major histocompatibility complex, class II, DP alpha 1	Plasma Membrane	transmembrane receptor	NA	NA
DPP4	0.302	4	dipeptidyl-peptidase 4	Plasma Membrane	peptidase	NA	NA
SLC7A7	0.302	4	solute carrier family 7 (amino acid transporter light chain, y+L system), member 7	Plasma Membrane	transporter	NA	NA
FZD5	0.302	4	frizzled family receptor 5	Plasma Membrane	G-protein coupled receptor	NA	NA
HAS2	0.302	4	hyaluronan synthase 2	Plasma Membrane	enzyme	NA	NA
CYTIP	0.302	4	cytohesin 1 interacting protein	Cytoplasm	other	NA	NA
ATF3	0.302	4	activating transcription factor 3	Nucleus	transcription regulator	NA	NA
PCSK1	0.302	4	proprotein convertase subtilisin/kexin type 1	Extracellular Space	peptidase	NA	NA
PPCDC	0.302	4	phosphopantothenoylcysteine decarboxylase	Cytoplasm	enzyme	NA	NA
VAMP8	0.301	4	vesicle-associated membrane protein 8 (endobrevin)	Plasma Membrane	other	NA	NA
CEBPB	0.301	4	CCAAT/enhancer binding protein (C/EBP), beta	Nucleus	transcription regulator	Mesenchymal	NA
EBNA1BP2	0.301	4	EBNA1 binding protein 2	Nucleus	other	NA	NA
MRPL42	0.301	4	mitochondrial ribosomal protein L42	Cytoplasm	other	NA	NA
PTBP1	0.301	4	polypyrimidine tract binding protein 1	Nucleus	enzyme	NA	NA
NAAA	0.3	4	N-acylethanolamine acid amidase	Cytoplasm	enzyme	NA	NA
MS4A6A	0.3	4	membrane-spanning 4-domains, subfamily A, member 6A	unknown	other	NA	NA
CTTN	0.299	4	cortactin	Plasma Membrane	other	NA	NA
RABL5	0.299	4	RAB, member RAS oncogene family-like 5	unknown	other	NA	NA
TTC30A	0.299	4	tetratricopeptide repeat domain 30A	unknown	other	NA	NA
LIMK2	0.298	4	LIM domain kinase 2	Cytoplasm	kinase	NA	NA
DHX8	0.298	4	DEAH (Asp-Glu-Ala-His) box polypeptide 8	Nucleus	enzyme	NA	NA
IL32	0.298	4	interleukin 32	Extracellular Space	other	NA	NA
WISP1	0.298	4	WNT1 inducible signaling pathway protein 1	Extracellular Space	other	NA	NA
CCDC19	0.298	4	coiled-coil domain containing 19	unknown	other	NA	NA
GCA	0.298	4	grancalcin, EF-hand calcium binding protein	Cytoplasm	other	NA	NA
AGBL2	0.298	4	ATP/GTP binding protein-like 2	Cytoplasm	enzyme	NA	NA
WDHD1	0.297	4	WD repeat and HMG-box DNA binding protein 1	Nucleus	other	NA	NA
LARP4	0.297	4	La ribonucleoprotein domain family, member 4	unknown	other	NA	NA
CTBS	0.297	4	chitobiase, di-N-acetyl-	Cytoplasm	enzyme	NA	NA
CCDC59	0.297	4	coiled-coil domain containing 59	unknown	other	NA	NA
RIC8A	0.297	4	resistance to inhibitors of cholinesterase 8 homolog A (C. elegans)	Cytoplasm	other	NA	NA
C3orf52	0.297	4	chromosome 3 open reading frame 52	unknown	other	NA	NA
LHFPL2	0.296	4	lipoma HMGIC fusion partner-like 2	unknown	enzyme	Mesenchymal	NA
CRLF3	0.296	4	cytokine receptor-like factor 3	Cytoplasm	transcription regulator	NA	NA
GPATCH2	0.296	4	G patch domain containing 2	unknown	other	NA	NA
ZDHHC4	0.296	4	zinc finger, DHHC-type containing 4	unknown	other	NA	NA
HLA-DPB1	0.295	4	major histocompatibility complex, class II, DP beta 1	Plasma Membrane	transmembrane receptor	NA	NA
HAMP	0.295	4	hepcidin antimicrobial peptide	Extracellular Space	other	NA	NA
HDHD3	0.295	4	haloacid dehalogenase-like hydrolase domain containing 3	Cytoplasm	enzyme	NA	NA
PHF11	0.295	4	PHD finger protein 11	unknown	other	Mesenchymal	NA
STIL	0.295	4	SCL/TAL1 interrupting locus	Nucleus	other	NA	NA
NOL3	0.295	4	nucleolar protein 3 (apoptosis repressor with CARD domain)	Nucleus	other	NA	NA
DHFR	0.295	4	dihydrofolate reductase	Nucleus	enzyme	NA	NA
NDUFB5	0.295	4	NADH dehydrogenase (ubiquinone) 1 beta subcomplex, 5, 16kDa	Cytoplasm	enzyme	NA	NA
RASSF1	0.294	4	Ras association (RalGDS/AF-6) domain family member 1	Nucleus	other	NA	NA
LPHN2	0.294	4	latrophilin 2	Plasma Membrane	G-protein coupled receptor	NA	NA
ALG6	0.294	4	asparagine-linked glycosylation 6, alpha-1,3-glucosyltransferase homolog (S. cerevisiae)	Cytoplasm	enzyme	NA	NA
DNTTIP2	0.294	4	deoxynucleotidyltransferase, terminal, interacting protein 2	Nucleus	other	NA	NA
WDR78	0.294	4	WD repeat domain 78	unknown	other	NA	NA
SERPINF1	0.293	4	serpin peptidase inhibitor, clade F (alpha-2 antiplasmin, pigment epithelium derived factor), member 1	Extracellular Space	other	NA	NA
OAS1	0.293	4	2'-5'-oligoadenylate synthetase 1, 40/46kDa	Cytoplasm	enzyme	NA	NA
GMFG	0.293	4	glia maturation factor, gamma	Cytoplasm	growth factor	NA	NA
TLR2	0.293	4	toll-like receptor 2	Plasma Membrane	transmembrane receptor	Mesenchymal	NA
DENR	0.293	4	density-regulated protein	unknown	other	NA	NA
TSPAN4	0.292	4	tetraspanin 4	Plasma Membrane	other	NA	NA
HMGN4	0.291	4	high mobility group nucleosomal binding domain 4	Nucleus	other	NA	NA
SYPL1	0.291	4	synaptophysin-like 1	Plasma Membrane	transporter	Mesenchymal	NA
ISG15	0.291	4	ISG15 ubiquitin-like modifier	Extracellular Space	other	NA	NA
SDHC	0.29	4	succinate dehydrogenase complex, subunit C, integral membrane protein, 15kDa	Cytoplasm	enzyme	NA	NA
FUCA1	0.29	4	fucosidase, alpha-L- 1, tissue	Cytoplasm	enzyme	NA	NA
CTNNAL1	0.29	4	catenin (cadherin-associated protein), alpha-like 1	Plasma Membrane	other	NA	NA
RNF7	0.29	4	ring finger protein 7	Nucleus	enzyme	NA	NA
RTP4	0.289	4	receptor (chemosensory) transporter protein 4	Plasma Membrane	other	NA	NA
RAB33B	0.289	4	RAB33B, member RAS oncogene family	Cytoplasm	enzyme	NA	NA
MAPK7	0.288	4	mitogen-activated protein kinase 7	Cytoplasm	kinase	NA	NA
NUP210	0.288	4	nucleoporin 210kDa	Nucleus	transporter	NA	NA
ARHGAP15	0.288	4	Rho GTPase activating protein 15	Cytoplasm	other	NA	NA
SH3BGRL3	0.288	4	SH3 domain binding glutamic acid-rich protein like 3	Nucleus	other	NA	NA
FAF2	0.288	4	Fas associated factor family member 2	Cytoplasm	other	NA	NA
2-Mar	0.288	4	mitochondrial amidoxime reducing component 2	Cytoplasm	enzyme	NA	NA
C5orf28	0.288	4	chromosome 5 open reading frame 28	unknown	other	NA	NA
NABP1	0.288	4	nucleic acid binding protein 1	Nucleus	other	NA	NA
ALPK3	0.287	4	alpha-kinase 3	Nucleus	kinase	NA	NA
ANG	0.287	4	angiogenin, ribonuclease, RNase A family, 5	Extracellular Space	enzyme	NA	NA
LACTB2	0.287	4	lactamase, beta 2	Cytoplasm	other	NA	NA
TRIAP1	0.287	4	TP53 regulated inhibitor of apoptosis 1	Cytoplasm	other	NA	NA
ZNF354A	0.287	4	zinc finger protein 354A	Nucleus	transcription regulator	NA	NA
ZBBX	0.287	4	zinc finger, B-box domain containing	unknown	other	NA	NA
COX17	0.287	4	COX17 cytochrome c oxidase assembly homolog (S. cerevisiae)	Cytoplasm	enzyme	NA	NA
IRF1	0.286	4	interferon regulatory factor 1	Nucleus	transcription regulator	NA	NA
LMNB2	0.286	4	lamin B2	Nucleus	other	NA	NA
ATP5H	0.286	4	ATP synthase, H+ transporting, mitochondrial Fo complex, subunit d	unknown	enzyme	NA	NA
DKC1	0.286	4	dyskeratosis congenita 1, dyskerin	Nucleus	enzyme	NA	NA
GPRC5A	0.285	4	G protein-coupled receptor, family C, group 5, member A	Plasma Membrane	G-protein coupled receptor	NA	NA
APOL1	0.285	4	apolipoprotein L, 1	Extracellular Space	transporter	NA	NA
FZD2	0.285	4	frizzled family receptor 2	Plasma Membrane	G-protein coupled receptor	NA	NA
C3	0.285	4	complement component 3	Extracellular Space	peptidase	NA	NA
ZMPSTE24	0.285	4	zinc metallopeptidase STE24 homolog (S. cerevisiae)	Nucleus	peptidase	NA	NA
KLHL7	0.285	4	kelch-like 7 (Drosophila)	Nucleus	other	NA	NA
LYN	0.284	4	v-yes-1 Yamaguchi sarcoma viral related oncogene homolog	Cytoplasm	kinase	NA	NA
MICA	0.284	4	MHC class I polypeptide-related sequence A	Plasma Membrane	other	NA	NA
MIS18A	0.284	4	MIS18 kinetochore protein homolog A (S. pombe)	Nucleus	other	NA	NA
PPP1CB	0.284	4	protein phosphatase 1, catalytic subunit, beta isozyme	Cytoplasm	phosphatase	NA	NA
[truncated: 11,180 more rows]

## Sheet: S6 Cell_Line_Stats
Dataset S6: Differential gene expression statistics for IL13Rα2-positive versus -negative cell lines.
Probeset ID	Gene Symbol	Fold-Change (Pos vs. Neg)	p-value (Pos vs. Neg)	FDR (Pos vs. Neg)	TCGA Subtype	Phillips Subtype
206172_at	IL13RA2	388.245	1.22e-14	4.33e-12	NA	NA
212097_at	CAV1	273.526	6.03e-10	2.37e-08	NA	NA
203324_s_at	CAV2	234.22	1.9e-16	1.76e-13	NA	NA
209160_at	AKR1C3	151.985	2.32e-07	3.42e-06	NA	NA
212364_at	MYO1B	150.742	1.61e-15	9.39e-13	NA	NA
212353_at	SULF1	149.284	3.76e-20	3.16e-16	NA	NA
203323_at	CAV2	148.838	4.01e-15	1.78e-12	NA	NA
224918_x_at	MGST1	147.972	5.82e-07	7.48e-06	NA	NA
203065_s_at	CAV1	144.407	8.43e-11	4.69e-09	NA	NA
209732_at	CLEC2B	142.149	7.64e-11	4.34e-09	Mesenchymal	NA
205352_at	SERPINI1	123.004	1.25e-08	2.9e-07	Neural	NA
1565162_s_at	MGST1	116.028	4.41e-06	4.17e-05	NA	NA
203476_at	TPBG	113.773	2.43e-10	1.12e-08	NA	NA
231736_x_at	MGST1	105.989	3.32e-06	3.28e-05	NA	NA
202859_x_at	IL8	103.965	1.62e-06	1.79e-05	NA	NA
202291_s_at	MGP	89.3526	4.88e-11	2.96e-09	NA	NA
201506_at	TGFBI	82.3481	2.4e-07	3.51e-06	Mesenchymal	NA
224480_s_at	AGPAT9	62.2698	2.58e-17	4.03e-14	NA	NA
211675_s_at	MDFIC	57.1263	7.31e-07	9.09e-06	NA	NA
211653_x_at	AKR1C2	56.7039	5.98e-10	2.35e-08	NA	NA
205609_at	ANGPT1	56.5424	1.32e-14	4.59e-12	NA	NA
223434_at	GBP3	54.5039	3.92e-15	1.77e-12	NA	NA
204602_at	DKK1	54.0858	9.87e-12	8.18e-10	NA	NA
222162_s_at	ADAMTS1	53.5525	1.09e-11	8.88e-10	NA	NA
215076_s_at	COL3A1	53.4256	1.47e-09	4.95e-08	NA	NA
212354_at	SULF1	52.5356	2.82e-19	1.18e-15	NA	NA
201744_s_at	LUM	51.4915	0.00158248	0.00635913	NA	NA
228564_at	LOC375295	51.2902	3.28e-23	1.79e-18	NA	NA
226834_at	---	49.4955	5.3e-08	9.82e-07	NA	NA
203510_at	MET	48.3354	7.61e-07	9.39e-06	NA	NA
209774_x_at	CXCL2	48.0911	1.95e-05	0.000148512	NA	NA
214321_at	NOV	45.2967	1.15e-16	1.26e-13	NA	NA
202948_at	IL1R1	44.3669	7.01e-08	1.24e-06	Mesenchymal	NA
216191_s_at	TRA@ /// TRD@	43.5557	1.28e-08	2.97e-07	NA	NA
212365_at	MYO1B	41.1829	7.75e-16	5.37e-13	NA	NA
204222_s_at	GLIPR1	40.4624	2.17e-09	6.8e-08	NA	NA
209699_x_at	AKR1C2	40.3877	2.99e-10	1.34e-08	NA	NA
203083_at	THBS2	40.3761	5.83e-06	5.31e-05	NA	NA
223177_at	NT5DC1	40.2123	1.48e-11	1.13e-09	NA	NA
226142_at	GLIPR1	40.0176	8.42e-11	4.69e-09	NA	NA
225871_at	STEAP2	39.7207	7.68e-16	5.37e-13	NA	NA
204774_at	EVI2A	39.6202	4.39e-09	1.23e-07	Neural	NA
203186_s_at	S100A4	39.2514	2.8e-08	5.76e-07	Mesenchymal	NA
222731_at	ZDHHC2	38.799	1.06e-09	3.77e-08	NA	NA
1556499_s_at	COL1A1	38.4075	0.00310611	0.0112438	Mesenchymal	NA
204151_x_at	AKR1C1	38.3646	2.57e-10	1.18e-08	NA	NA
226136_at	GLIPR1	38.0056	2.23e-09	6.97e-08	NA	NA
208944_at	TGFBR2	37.4183	9.16e-09	2.24e-07	Mesenchymal	NA
222108_at	AMIGO2	37.0217	2.58e-14	7.54e-12	NA	NA
204359_at	FLRT2	36.7989	5.6e-12	5.28e-10	NA	NA
227140_at	---	36.7828	0.00102282	0.00438229	NA	NA
204475_at	MMP1	36.7507	0.00674064	0.021334	NA	NA
203498_at	RCAN2	36.4042	8.89e-08	1.51e-06	NA	NA
225314_at	OCIAD2	36.281	5.37e-08	9.92e-07	NA	NA
201859_at	SRGN	36.2208	0.00188487	0.00737004	NA	NA
201852_x_at	COL3A1	34.7023	1.83e-08	4.02e-07	NA	NA
226545_at	CD109	34.689	1.26e-07	2.02e-06	NA	NA
224823_at	MYLK	34.5719	2.52e-10	1.16e-08	NA	NA
212464_s_at	FN1	34.3915	1.52e-10	7.63e-09	NA	NA
226448_at	FAM89A	33.9957	2.11e-12	2.45e-10	NA	NA
232231_at	RUNX2	33.5785	1.49e-08	3.36e-07	Mesenchymal	NA
209267_s_at	SLC39A8	32.8439	2.04e-09	6.47e-08	NA	NA
218559_s_at	MAFB	32.3585	3.17e-09	9.36e-08	Mesenchymal	NA
223178_s_at	NT5DC1	31.1498	4.09e-12	4.09e-10	NA	NA
217143_s_at	TRA@ /// TRD@	31.1222	3.04e-08	6.18e-07	NA	NA
205668_at	LY75	30.8405	1.14e-12	1.55e-10	Mesenchymal	NA
213415_at	CLIC2	30.5201	7.4e-11	4.23e-09	NA	NA
206561_s_at	AKR1B10	30.2283	9.43e-06	7.98e-05	NA	NA
212344_at	SULF1	30.1435	9.18e-19	2.91e-15	NA	NA
219926_at	POPDC3	29.4564	0.000140727	0.000808217	Neural	NA
201117_s_at	CPE	29.3155	8.3e-07	1.01e-05	NA	NA
202565_s_at	SVIL	29.1651	1.2e-09	4.19e-08	NA	NA
211719_x_at	FN1	28.9655	8.54e-11	4.74e-09	NA	NA
210495_x_at	FN1	28.9423	2.16e-10	1.02e-08	NA	NA
216442_x_at	FN1	28.9013	2.8e-10	1.26e-08	NA	NA
202437_s_at	CYP1B1	28.799	1.82e-06	1.97e-05	NA	NA
212473_s_at	MICAL2	27.6892	3.88e-06	3.74e-05	NA	NA
225975_at	PCDH18	27.5612	7.46e-07	9.25e-06	NA	NA
211343_s_at	COL13A1	27.5262	1.86e-06	2.01e-05	NA	NA
221730_at	COL5A2	27.3624	1.01e-09	3.62e-08	NA	NA
211990_at	HLA-DPA1	26.9938	2.37e-09	7.32e-08	NA	NA
206932_at	CH25H	26.8089	4.2e-05	0.000287098	NA	NA
213010_at	PRKCDBP	26.4254	2.36e-09	7.31e-08	NA	NA
211161_s_at	COL3A1	26.1712	2.5e-07	3.63e-06	NA	NA
205825_at	PCSK1	26.1617	8.73e-08	1.48e-06	NA	NA
204790_at	SMAD7	26.152	1.35e-11	1.05e-09	NA	NA
223092_at	ANKH	25.8016	1.12e-16	1.25e-13	NA	NA
202404_s_at	COL1A2	25.4964	0.0145761	0.0401788	Mesenchymal	NA
219147_s_at	C9orf95	25.4872	6.11e-13	9.25e-11	NA	NA
228937_at	C13orf31	25.303	7.11e-07	8.87e-06	NA	NA
201215_at	PLS3	25.2587	1.62e-08	3.62e-07	Mesenchymal	NA
205542_at	STEAP1	25.1878	3.63e-07	5e-06	NA	NA
226695_at	PRRX1	25.144	6.99e-08	1.24e-06	NA	NA
221019_s_at	COLEC12	24.3779	0.0016114	0.00646251	NA	NA
224838_at	FOXP1	24.1992	2.34e-10	1.09e-08	NA	NA
230748_at	SLC16A6	23.4458	0.000126447	0.000736811	NA	NA
228335_at	CLDN11	23.4012	0.0069465	0.0218753	NA	NA
203837_at	MAP3K5	23.0557	1.58e-09	5.23e-08	NA	NA
239624_at	---	22.9517	1.11e-11	8.99e-10	NA	NA
204780_s_at	FAS	22.9482	8.1e-06	7.02e-05	NA	NA
201438_at	COL6A3	22.9109	0.0111644	0.0322542	NA	NA
205234_at	SLC16A4	22.8598	1.57e-19	7.81e-16	NA	NA
230746_s_at	LOC100288985	22.7433	4.94e-11	2.98e-09	NA	NA
223093_at	ANKH	22.6544	1.31e-11	1.02e-09	NA	NA
201858_s_at	SRGN	22.4885	0.00249552	0.00934156	NA	NA
235696_at	---	21.9094	6.71e-13	9.96e-11	NA	NA
213425_at	WNT5A	21.8932	0.00477551	0.016048	NA	NA
227628_at	GPX8	21.8302	5.64e-05	0.00037004	NA	NA
229151_at	SLC14A1	21.826	0.00482094	0.0161762	NA	NA
219572_at	CADPS2	21.7968	5.7e-09	1.52e-07	NA	NA
209392_at	ENPP2	21.7814	0.0022852	0.00867061	Neural	NA
205856_at	SLC14A1	21.5841	0.00537307	0.0177012	NA	NA
211026_s_at	MGLL	21.5554	1.05e-09	3.73e-08	NA	NA
218162_at	OLFML3	21.4948	6.35e-08	1.14e-06	NA	NA
204748_at	PTGS2	21.3247	0.00273131	0.0100772	NA	NA
228728_at	C7orf58	21.302	3.69e-10	1.57e-08	NA	NA
209288_s_at	CDC42EP3	21.2942	2.74e-15	1.36e-12	NA	NA
232617_at	CTSS	21.2502	4.77e-09	1.31e-07	NA	NA
212298_at	NRP1	21.2484	3.47e-05	0.000243976	Mesenchymal	NA
232068_s_at	TLR4	21.065	5.9e-11	3.48e-09	Mesenchymal	NA
209286_at	CDC42EP3	21.0604	1.77e-16	1.69e-13	NA	NA
230135_at	---	20.9809	6.45e-11	3.74e-09	NA	NA
201116_s_at	CPE	20.9613	4.19e-06	3.99e-05	NA	NA
215719_x_at	FAS	20.6999	2.72e-06	2.76e-05	NA	NA
214085_x_at	GLIPR1	20.6734	2.59e-10	1.18e-08	NA	NA
204285_s_at	PMAIP1	20.5792	2.65e-08	5.48e-07	NA	NA
202902_s_at	CTSS	20.4748	1.87e-10	9.05e-09	NA	NA
204286_s_at	PMAIP1	20.3885	3.55e-08	6.99e-07	NA	NA
1562102_at	AKR1C1	20.3682	6.19e-09	1.63e-07	NA	NA
213943_at	TWIST1	20.1599	0.00054066	0.00254943	NA	NA
236859_at	RUNX2	19.9271	7.02e-17	9.59e-14	Mesenchymal	NA
212956_at	TBC1D9	19.8917	0.000250388	0.00131862	NA	NA
210145_at	PLA2G4A	19.6825	1.41e-07	2.22e-06	NA	NA
216594_x_at	AKR1C1	19.6469	1.67e-08	3.72e-07	NA	NA
223278_at	GJB2	19.6221	1.12e-05	9.29e-05	NA	NA
225685_at	---	19.5806	3.25e-16	2.58e-13	NA	NA
228141_at	GPX8	19.567	0.000282374	0.00146312	NA	NA
204597_x_at	STC1	19.5534	4.2e-09	1.19e-07	NA	NA
209047_at	AQP1 /// INMT	19.5445	0.00030125	0.00154743	NA	NA
204044_at	QPRT	19.4498	1.56e-10	7.8e-09	NA	NA
216944_s_at	ITPR1	19.3053	7.17e-10	2.72e-08	NA	NA
202555_s_at	MYLK	19.2838	3.47e-10	1.5e-08	NA	NA
223287_s_at	FOXP1	19.13	5.6e-11	3.33e-09	NA	NA
224837_at	FOXP1	19.0666	2.21e-10	1.04e-08	NA	NA
205990_s_at	WNT5A	19.0547	0.00466212	0.0157298	NA	NA
227607_at	STAMBPL1	18.9118	1.84e-09	5.96e-08	NA	NA
242414_at	QPRT	18.9063	2.98e-11	1.96e-09	NA	NA
209909_s_at	TGFB2	18.8993	4.01e-13	6.65e-11	NA	NA
224341_x_at	TLR4	18.8973	9.22e-12	7.79e-10	Mesenchymal	NA
226109_at	C21orf91	18.8699	5.63e-05	0.000369566	NA	NA
204595_s_at	STC1	18.8059	7.88e-09	1.98e-07	NA	NA
224414_s_at	CARD6	18.66	9.1e-13	1.31e-10	NA	NA
209708_at	MOXD1	18.5951	4.06e-05	0.000279152	NA	NA
234994_at	TMEM200A	18.4493	0.00930767	0.0277786	NA	NA
212543_at	AIM1	18.3991	8.47e-08	1.45e-06	Mesenchymal	NA
220952_s_at	PLEKHA5	18.3766	3.57e-08	7.04e-07	NA	NA
205767_at	EREG	18.3588	0.00157301	0.0063285	NA	NA
1554474_a_at	MOXD1	18.3433	5e-05	0.000333057	NA	NA
203650_at	PROCR	18.2917	3.71e-12	3.78e-10	Mesenchymal	NA
203710_at	ITPR1	18.2209	3.98e-09	1.13e-07	NA	NA
202403_s_at	COL1A2	18.1674	0.0148949	0.0409096	Mesenchymal	NA
205608_s_at	ANGPT1	18.1036	1.83e-14	5.83e-12	NA	NA
201278_at	DAB2	18.088	6.28e-05	0.000405036	Mesenchymal	NA
213830_at	TRD@	17.9138	2.54e-06	2.62e-05	NA	NA
203868_s_at	VCAM1	17.8753	1.42e-06	1.6e-05	NA	NA
204501_at	NOV	17.7501	4.6e-14	1.15e-11	NA	NA
213293_s_at	TRIM22	17.7095	3.46e-10	1.5e-08	Mesenchymal	NA
227167_s_at	---	17.7042	2.66e-05	0.000194233	NA	NA
211506_s_at	IL8	17.677	0.000191686	0.00105166	NA	NA
229674_at	SERTAD4	17.6021	2.32e-10	1.08e-08	NA	NA
228850_s_at	---	17.5854	0.00769055	0.0237788	NA	NA
202436_s_at	CYP1B1	17.5767	4.43e-06	4.19e-05	NA	NA
221729_at	COL5A2	17.5575	1.78e-08	3.92e-07	NA	NA
204337_at	RGS4	17.5184	3.84e-12	3.9e-10	NA	NA
200660_at	S100A11	17.4568	0.000926177	0.00402854	Mesenchymal	NA
217428_s_at	COL10A1	17.3502	0.0189613	0.0500052	NA	NA
238067_at	TBC1D8B	17.3481	6.68e-10	2.56e-08	NA	NA
218924_s_at	CTBS	17.3459	7.64e-06	6.69e-05	NA	NA
210511_s_at	INHBA	17.3137	0.00147197	0.00597875	NA	NA
212063_at	CD44	17.1747	2.3e-09	7.14e-08	NA	NA
230660_at	SERTAD4	17.119	6.21e-09	1.63e-07	NA	NA
223422_s_at	ARHGAP24	17.0865	4.61e-06	4.34e-05	NA	NA
204221_x_at	GLIPR1	16.9977	5.66e-10	2.25e-08	NA	NA
202310_s_at	COL1A1	16.9356	0.00599301	0.0193726	Mesenchymal	NA
1556037_s_at	HHIP	16.8746	1.8e-14	5.74e-12	NA	NA
203836_s_at	MAP3K5	16.818	1.74e-08	3.86e-07	NA	NA
210042_s_at	CTSZ	16.7689	0.0108576	0.0315214	Mesenchymal	NA
213982_s_at	RABGAP1L	16.7589	9.42e-12	7.87e-10	Mesenchymal	NA
226342_at	SPTBN1	16.7063	2.76e-06	2.8e-05	NA	NA
1553995_a_at	NT5E	16.681	1.68e-12	2.05e-10	NA	NA
235874_at	PRSS35	16.6763	4.9e-05	0.000327142	NA	NA
235956_at	KIAA1377	16.6706	2.13e-13	3.98e-11	NA	NA
202465_at	PCOLCE	16.6344	2.54e-16	2.07e-13	NA	NA
205289_at	BMP2	16.6197	5.3e-05	0.000350047	NA	NA
223122_s_at	SFRP2	16.4947	0.00723277	0.0226357	NA	NA
207542_s_at	AQP1 /// INMT	16.4803	0.000241122	0.00127721	NA	NA
216252_x_at	FAS	16.3566	2.17e-06	2.29e-05	NA	NA
212014_x_at	CD44	16.3139	1.29e-06	1.47e-05	NA	NA
227410_at	FAM43A	16.1422	1.49e-09	5e-08	NA	NA
226415_at	VAT1L	16.0337	0.000251851	0.00132441	NA	NA
204823_at	NAV3	15.9697	1.35e-05	0.000109004	NA	NA
209835_x_at	CD44	15.9615	1.12e-06	1.31e-05	NA	NA
205991_s_at	PRRX1	15.7939	1.33e-08	3.07e-07	NA	NA
213274_s_at	CTSB	15.7416	2.21e-11	1.55e-09	Mesenchymal	NA
226534_at	KITLG	15.6918	1.44e-08	3.27e-07	NA	NA
204646_at	DPYD	15.6113	0.000273606	0.00142213	NA	NA
205286_at	TFAP2C	15.6098	1.78e-05	0.000137542	NA	NA
205174_s_at	QPCT	15.5586	7.17e-08	1.26e-06	NA	NA
205066_s_at	ENPP1	15.5452	6.99e-08	1.24e-06	NA	NA
207426_s_at	TNFSF4	15.5364	5.16e-09	1.4e-07	NA	NA
221748_s_at	TNS1	15.4605	6.78e-06	6.05e-05	NA	NA
1553994_at	NT5E	15.4364	1.42e-13	2.91e-11	NA	NA
201280_s_at	DAB2	15.3813	0.000112686	0.00066592	Mesenchymal	NA
220603_s_at	MCTP2	15.3253	3.14e-05	0.000223416	NA	NA
222156_x_at	CCPG1	15.2729	5.21e-19	1.78e-15	NA	NA
1552701_a_at	CARD16	15.2399	4.83e-07	6.38e-06	NA	NA
201893_x_at	DCN	15.2182	0.00577984	0.0187957	NA	NA
227486_at	NT5E	15.1959	5.3e-08	9.82e-07	NA	NA
204490_s_at	CD44	15.1366	1.13e-06	1.31e-05	NA	NA
212828_at	SYNJ2	15.0569	2.5e-09	7.67e-08	NA	NA
209631_s_at	GPR37	14.9345	0.00112331	0.00474374	NA	NA
218923_at	CTBS	14.8672	1.84e-06	1.99e-05	NA	NA
209156_s_at	COL6A2	14.8404	0.000361234	0.0018037	NA	NA
201925_s_at	CD55	14.8387	0.00493827	0.0165067	NA	NA
206336_at	CXCL6	14.8271	0.00668365	0.0211941	NA	NA
229088_at	ENPP1	14.7861	3.46e-06	3.39e-05	NA	NA
201525_at	APOD	14.767	0.0309834	0.0746959	NA	NA
204112_s_at	HNMT	14.701	8.83e-06	7.55e-05	NA	NA
228128_x_at	PAPPA	14.6668	0.00265567	0.00984198	NA	NA
203934_at	KDR	14.6151	2.34e-18	5.56e-15	NA	NA
211896_s_at	DCN	14.6136	0.00654279	0.0208341	NA	NA
206584_at	LY96	14.5402	1.17e-11	9.34e-10	Mesenchymal	NA
202687_s_at	TNFSF10	14.4851	3.38e-06	3.33e-05	NA	NA
207414_s_at	PCSK6	14.4509	0.00496648	0.0165821	NA	NA
1556209_at	CLEC2B	14.425	1.23e-06	1.41e-05	Mesenchymal	NA
225275_at	EDIL3	14.4226	0.0172178	0.0461322	Neural	NA
203386_at	TBC1D4	14.3452	1.23e-05	0.000100274	NA	NA
205290_s_at	BMP2	14.3138	8.88e-05	0.000543718	NA	NA
239903_at	---	14.269	1.52e-05	0.000120444	NA	NA
206163_at	MAB21L1	14.2511	5.33e-08	9.88e-07	Classical	NA
221773_at	ELK3	14.2495	0.000546517	0.00257392	NA	NA
224940_s_at	PAPPA	14.2458	0.000982724	0.00423942	NA	NA
215388_s_at	CFH /// CFHR1	14.213	0.000106522	0.000636373	NA	NA
211756_at	PTHLH	14.1891	8.17e-12	7.17e-10	NA	NA
214591_at	KLHL4	14.1558	6.12e-07	7.8e-06	Classical	NA
220076_at	ANKH	14.1261	1.74e-09	5.67e-08	NA	NA
204489_s_at	CD44	14.0952	1.31e-07	2.09e-06	NA	NA
223655_at	CD163L1	14.0279	4.14e-06	3.95e-05	NA	NA
203903_s_at	HEPH	14.0207	0.00692018	0.021805	NA	NA
222835_at	THSD4	14.0174	2.53e-16	2.07e-13	NA	NA
225414_at	RNF149	14.0099	0.00144623	0.00588953	NA	NA
202688_at	TNFSF10	13.9322	1.42e-05	0.00011379	NA	NA
206084_at	PTPRR	13.8695	0.000111189	0.000658853	NA	NA
210612_s_at	SYNJ2	13.8605	2.15e-08	4.59e-07	NA	NA
221156_x_at	CCPG1	13.8091	2.09e-18	5.19e-15	NA	NA
226117_at	TIFA	13.7878	2.72e-07	3.91e-06	NA	NA
228497_at	SLC22A15	13.6988	7.41e-07	9.19e-06	NA	NA
219563_at	C14orf139	13.5995	1.25e-11	9.83e-10	NA	NA
209448_at	HTATIP2	13.5773	0.000533295	0.00251969	NA	NA
202311_s_at	COL1A1	13.5743	0.00427542	0.0146511	Mesenchymal	NA
225847_at	NCEH1	13.554	2.81e-08	5.78e-07	NA	NA
242037_at	ASPH	13.4788	4.64e-08	8.75e-07	NA	NA
202180_s_at	MVP	13.4627	4.67e-09	1.29e-07	Mesenchymal	NA
229844_at	---	13.4167	4.84e-12	4.69e-10	NA	NA
227240_at	NGEF	13.4111	3.22e-07	4.52e-06	NA	NA
228783_at	BVES	13.4011	7.92e-08	1.37e-06	NA	NA
203066_at	CHST15	13.3007	2.8e-06	2.83e-05	NA	NA
209955_s_at	FAP	13.2063	0.000315018	0.00160705	NA	NA
221511_x_at	CCPG1	13.1928	3.3e-19	1.29e-15	NA	NA
208131_s_at	PTGIS	13.1877	0.00769712	0.0237937	NA	NA
204158_s_at	TCIRG1	13.1375	4.28e-10	1.78e-08	Mesenchymal	NA
213423_x_at	TUSC3	13.001	0.0137605	0.0383699	NA	NA
230130_at	---	12.9882	0.00719191	0.022534	NA	NA
203998_s_at	SYT1	12.9462	0.00793518	0.0243767	NA	NA
227070_at	GLT8D2	12.9406	0.0042338	0.0145386	NA	NA
223786_at	CHST6	12.9381	1.32e-07	2.1e-06	NA	NA
214933_at	CACNA1A	12.8583	1.76e-05	0.000136478	NA	NA
209365_s_at	ECM1	12.825	1.53e-13	3.04e-11	NA	NA
214696_at	C17orf91	12.8103	4.34e-12	4.29e-10	NA	NA
209897_s_at	SLIT2	12.7928	0.00471655	0.0158826	NA	NA
209946_at	VEGFC	12.7881	0.0127122	0.0359231	NA	NA
204955_at	SRPX	12.7852	5.74e-09	1.53e-07	NA	NA
236858_s_at	RUNX2	12.7327	2.23e-17	3.77e-14	Mesenchymal	NA
206513_at	AIM2	12.6943	0.00451945	0.015328	NA	NA
222288_at	---	12.6899	1.54e-12	1.91e-10	NA	NA
225173_at	ARHGAP18	12.6872	2.1e-14	6.48e-12	NA	NA
227345_at	TNFRSF10D	12.6073	0.0106448	0.0309891	NA	NA
214151_s_at	CCPG1	12.5314	1.92e-18	5e-15	NA	NA
222294_s_at	---	12.494	4.12e-15	1.82e-12	NA	NA
219202_at	RHBDF2	12.4794	2.51e-08	5.25e-07	NA	NA
204401_at	KCNN4	12.4534	3.67e-06	3.57e-05	NA	NA
222043_at	CLU	12.4358	6.66e-08	1.19e-06	NA	NA
202820_at	AHR	12.423	6.41e-05	0.000411855	NA	NA
242907_at	---	12.386	4.95e-12	4.77e-10	NA	NA
230560_at	STXBP6	12.3561	0.000321152	0.00163279	NA	NA
237466_s_at	HHIP	12.3447	3e-12	3.24e-10	NA	NA
231577_s_at	GBP1	12.3441	3.06e-06	3.06e-05	NA	NA
204464_s_at	EDNRA	12.3405	0.00264992	0.00982401	NA	NA
210675_s_at	PTPRR	12.2845	0.000163933	0.000918626	NA	NA
204260_at	CHGB	12.2565	2.66e-13	4.76e-11	NA	NA
203999_at	SYT1	12.1715	0.00671227	0.0212615	NA	NA
218983_at	C1RL	12.1381	1.88e-08	4.09e-07	NA	NA
202748_at	GBP2	12.1115	5.19e-11	3.13e-09	NA	NA
223094_s_at	ANKH	12.0622	5.48e-15	2.27e-12	NA	NA
201926_s_at	CD55	12.056	0.00423369	0.0145386	NA	NA
202270_at	GBP1	12.0407	5.93e-06	5.39e-05	NA	NA
202888_s_at	ANPEP	12.0271	0.0103564	0.0303028	NA	NA
1557905_s_at	CD44	12.0211	2.07e-06	2.2e-05	NA	NA
210916_s_at	CD44	12.0167	8.67e-06	7.44e-05	NA	NA
235733_at	---	12.0115	2.11e-10	1e-08	NA	NA
227801_at	TRIM59	11.9959	7.03e-08	1.25e-06	NA	NA
222486_s_at	ADAMTS1	11.9601	1e-08	2.42e-07	NA	NA
202363_at	SPOCK1	11.8692	9.19e-05	0.000560116	NA	NA
211732_x_at	HNMT	11.8456	1.05e-08	2.51e-07	NA	NA
202566_s_at	SVIL	11.835	1.26e-10	6.54e-09	NA	NA
241864_x_at	---	11.7632	1.04e-11	8.55e-10	NA	NA
209396_s_at	CHI3L1	11.755	0.0212917	0.0549815	Mesenchymal	Mesenchymal
204897_at	PTGER4	11.6919	0.00753134	0.0233924	Mesenchymal	NA
215856_at	SIGLEC15	11.6835	0.00467025	0.0157456	NA	NA
214974_x_at	CXCL5	11.6819	0.00397882	0.0138061	NA	NA
223710_at	CCL26	11.5926	4.74e-05	0.000318081	NA	NA
204781_s_at	FAS	11.5873	1.19e-05	9.73e-05	NA	NA
226388_at	TCEA3	11.5837	5.61e-07	7.26e-06	NA	NA
227961_at	CTSB	11.5756	2.78e-12	3.05e-10	Mesenchymal	NA
228057_at	DDIT4L	11.5675	6.38e-08	1.15e-06	NA	NA
214152_at	CCPG1	11.5656	2.44e-16	2.07e-13	NA	NA
1556427_s_at	LRRN4CL	11.5619	1.11e-09	3.9e-08	NA	NA
217599_s_at	MDFIC	11.494	0.00105248	0.0044904	NA	NA
241803_s_at	RP11-160N1.10	11.4809	1.37e-11	1.06e-09	NA	NA
213135_at	TIAM1	11.4519	1.56e-09	5.18e-08	NA	NA
235766_x_at	---	11.4315	2.06e-15	1.08e-12	NA	NA
223642_at	ZIC2	11.4278	0.000996012	0.0042866	NA	NA
217388_s_at	KYNU	11.4011	0.00703451	0.0221168	Mesenchymal	NA
202890_at	MAP7	11.3629	7.25e-10	2.74e-08	NA	NA
221760_at	MAN1A1	11.3617	0.000304333	0.00156078	Mesenchymal	NA
225171_at	ARHGAP18	11.3487	1.23e-12	1.63e-10	NA	NA
229176_at	ANKH	11.3134	1.5e-11	1.13e-09	NA	NA
202391_at	BASP1	11.3041	0.00648695	0.0206831	Neural	NA
209211_at	KLF5	11.2525	5.8e-14	1.41e-11	NA	NA
225603_s_at	C8orf83	11.2483	2.12e-06	2.25e-05	NA	NA
217220_at	---	11.2429	2.61e-09	7.97e-08	NA	NA
218451_at	CDCP1	11.2253	0.00432642	0.0147888	Mesenchymal	NA
205618_at	PRRG1	11.209	1.06e-10	5.68e-09	NA	NA
219229_at	SLCO3A1	11.1502	1.14e-13	2.46e-11	NA	NA
203401_at	PRPS2	11.1417	0.0011357	0.00478645	NA	NA
231192_at	LPAR3	11.1275	0.00506865	0.0168734	NA	NA
202435_s_at	CYP1B1	11.125	2.41e-05	0.000178314	NA	NA
213416_at	ITGA4	11.0851	0.00504324	0.0168011	Mesenchymal	NA
233092_s_at	LOC100271840	11.0588	0.00254501	0.00949235	NA	NA
209684_at	RIN2	11.0227	3.47e-12	3.59e-10	NA	NA
209395_at	CHI3L1	11.0059	0.023207	0.0589365	Mesenchymal	Mesenchymal
202901_x_at	CTSS	10.9963	2.31e-08	4.9e-07	NA	NA
201939_at	PLK2	10.9855	9.5e-08	1.59e-06	NA	NA
229404_at	TWIST2	10.8937	2.68e-06	2.73e-05	NA	NA
230319_at	---	10.8291	7.71e-07	9.5e-06	NA	NA
213075_at	OLFML2A	10.8196	0.000793492	0.00353176	NA	NA
224941_at	PAPPA	10.802	0.00619653	0.0199304	NA	NA
203786_s_at	TPD52L1	10.789	1.12e-07	1.83e-06	NA	NA
242881_x_at	---	10.7643	4.17e-11	2.6e-09	NA	NA
206376_at	SLC6A15	10.7394	0.00352789	0.0125008	NA	NA
204479_at	OSTF1	10.7357	2.03e-12	2.37e-10	NA	NA
203939_at	NT5E	10.7344	1.11e-10	5.9e-09	NA	NA
206710_s_at	EPB41L3	10.7274	0.0165195	0.0445611	Neural	NA
216840_s_at	LAMA2	10.724	2.62e-07	3.78e-06	NA	NA
227609_at	EPSTI1	10.7237	0.000888113	0.00388585	NA	NA
1559433_at	LOC149773	10.7231	0.00618558	0.0198998	NA	NA
210218_s_at	SP100	10.6834	5.24e-13	8.14e-11	Mesenchymal	NA
223592_s_at	RNF135	10.6806	0.00109853	0.0046567	NA	NA
1555950_a_at	CD55	10.6697	0.00482182	0.0161768	NA	NA
201631_s_at	IER3	10.6452	0.000440717	0.00214246	NA	NA
225599_s_at	C8orf83	10.626	2.73e-09	8.26e-08	NA	NA
219869_s_at	SLC39A8	10.6231	2.02e-10	9.65e-09	NA	NA
221667_s_at	HSPB8	10.6136	0.00273206	0.010078	NA	NA
222730_s_at	ZDHHC2	10.5537	4.26e-13	6.89e-11	NA	NA
203854_at	CFI	10.5281	1.18e-05	9.67e-05	NA	NA
204720_s_at	DNAJC6	10.52	4.97e-06	4.63e-05	NA	NA
211864_s_at	MYOF	10.5012	4.45e-08	8.45e-07	NA	NA
209515_s_at	RAB27A	10.4856	1.32e-15	8.32e-13	Mesenchymal	NA
204677_at	CDH5	10.4778	0.00589145	0.0191053	NA	NA
220979_s_at	ST6GALNAC5	10.4761	5.74e-05	0.0003753	NA	NA
238542_at	ULBP2	10.4635	1.94e-07	2.93e-06	NA	NA
241404_at	---	10.4443	0.000315032	0.00160705	NA	NA
202628_s_at	SERPINE1	10.4414	2.32e-06	2.42e-05	Mesenchymal	Mesenchymal
201798_s_at	MYOF	10.4407	6.71e-08	1.2e-06	NA	NA
225102_at	MGLL	10.4119	4.1e-09	1.16e-07	NA	NA
204237_at	GULP1	10.3972	3.5e-05	0.000245743	NA	NA
220407_s_at	TGFB2	10.3893	1.11e-11	8.96e-10	NA	NA
205499_at	SRPX2	10.3826	1.01e-08	2.43e-07	Mesenchymal	NA
1552703_s_at	CARD16 /// CASP1	10.3757	7.85e-08	1.36e-06	NA	NA
243252_at	---	10.3554	9.22e-17	1.18e-13	NA	NA
202269_x_at	GBP1	10.335	2.21e-06	2.32e-05	NA	NA
203827_at	WIPI1	10.3313	1.87e-10	9.08e-09	NA	NA
229095_s_at	LIMS3 /// LIMS3-LOC440895 /// LOC440895	10.3075	0.00373184	0.0130907	NA	NA
228082_at	ASAM	10.2901	3.12e-06	3.1e-05	NA	NA
205941_s_at	COL10A1	10.2895	0.0327494	0.0782129	NA	NA
239229_at	---	10.2869	1.41e-08	3.21e-07	NA	NA
235276_at	EPSTI1	10.2248	0.00132067	0.00544387	NA	NA
210757_x_at	DAB2	10.2038	6.83e-05	0.000434048	Mesenchymal	NA
225166_at	ARHGAP18	10.1718	1.32e-10	6.79e-09	NA	NA
223611_s_at	LNX1	10.1707	2.35e-11	1.63e-09	NA	NA
203234_at	UPP1	10.1497	6.55e-11	3.8e-09	NA	NA
203789_s_at	SEMA3C	10.1436	0.0050062	0.0166946	NA	NA
213800_at	CFH	10.1338	4.62e-05	0.000311164	NA	NA
200696_s_at	GSN	10.1298	9.36e-09	2.28e-07	NA	NA
212681_at	EPB41L3	10.0382	0.0143048	0.039582	Neural	NA
201141_at	GPNMB	10.0136	0.000840516	0.00370906	NA	NA
205098_at	CCR1	9.95959	1.32e-06	1.5e-05	NA	NA
217853_at	TNS3	9.91541	4.11e-11	2.57e-09	NA	NA
207565_s_at	MR1	9.89434	1.23e-09	4.28e-08	NA	NA
231817_at	USP53	9.84655	4.79e-06	4.48e-05	NA	NA
210839_s_at	ENPP2	9.83319	0.00477226	0.0160397	Neural	NA
228010_at	PPP2R2C	9.83024	1.62e-05	0.000127265	NA	NA
218486_at	KLF11	9.77715	0.00012657	0.000737291	NA	NA
226237_at	---	9.74959	0.00552052	0.0180967	NA	NA
220117_at	ZNF385D	9.73361	1.09e-09	3.85e-08	NA	NA
215073_s_at	NR2F2	9.72201	1.22e-09	4.24e-08	NA	NA
230036_at	SAMD9L	9.71434	2.96e-10	1.33e-08	NA	NA
209287_s_at	CDC42EP3	9.68849	7.73e-15	3.04e-12	NA	NA
210372_s_at	TPD52L1	9.6849	8.69e-07	1.05e-05	NA	NA
211323_s_at	ITPR1	9.67569	1.29e-09	4.47e-08	NA	NA
231775_at	TNFRSF10A	9.67044	0.0013859	0.00567808	NA	NA
229822_at	---	9.65691	1.01e-11	8.33e-10	NA	NA
224463_s_at	C11orf70	9.64123	5.64e-07	7.29e-06	NA	NA
226997_at	ADAMTS12	9.62309	3.16e-07	4.43e-06	NA	NA
225681_at	CTHRC1	9.61156	0.015614	0.0425678	NA	NA
213836_s_at	WIPI1	9.60468	1.98e-11	1.43e-09	NA	NA
207038_at	SLC16A6	9.55963	0.00157343	0.00632973	NA	NA
204702_s_at	NFE2L3	9.51168	2.15e-06	2.27e-05	NA	NA
231227_at	---	9.50141	0.00717333	0.0224871	NA	NA
212657_s_at	IL1RN	9.48416	0.00780013	0.0240415	NA	NA
241871_at	CAMK4	9.47902	5.06e-07	6.63e-06	NA	NA
226614_s_at	FAM167A	9.47803	1.38e-10	7.09e-09	NA	NA
212940_at	COL6A1	9.4763	8.72e-05	0.000535186	NA	NA
213975_s_at	LYZ	9.46088	0.0211264	0.0546295	NA	NA
223836_at	FGFBP2	9.43155	2.56e-08	5.33e-07	NA	NA
209656_s_at	TMEM47	9.4182	0.0108086	0.0313973	NA	NA
223121_s_at	SFRP2	9.41005	0.00533858	0.0176016	NA	NA
239398_at	KLHL31	9.37597	0.00382502	0.0133561	NA	NA
205442_at	MFAP3L	9.36519	1.43e-08	3.25e-07	NA	NA
1555579_s_at	PTPRM	9.33905	0.000163827	0.000918126	NA	NA
227606_s_at	STAMBPL1	9.33419	2.84e-07	4.06e-06	NA	NA
211776_s_at	EPB41L3	9.30477	0.0112804	0.0325224	Neural	NA
210510_s_at	NRP1	9.30277	1.51e-10	7.59e-09	Mesenchymal	NA
204472_at	GEM	9.29731	2.36e-06	2.45e-05	NA	NA
229218_at	COL1A2	9.27277	0.013158	0.0369764	Mesenchymal	NA
211368_s_at	CASP1	9.23904	2.49e-06	2.57e-05	Mesenchymal	NA
226603_at	SAMD9L	9.23809	1.92e-09	6.15e-08	NA	NA
238332_at	ANKRD29	9.23684	0.00501902	0.0167326	NA	NA
226847_at	FST	9.21179	0.00184008	0.00722903	NA	NA
1559280_a_at	---	9.19014	0.000166321	0.000929932	NA	NA
242871_at	PAQR5	9.18812	0.00461513	0.0156001	NA	NA
203887_s_at	THBD	9.17568	0.0108818	0.0315732	Mesenchymal	NA
217995_at	SQRDL	9.15932	3.51e-08	6.95e-07	Mesenchymal	NA
227439_at	ANKS1B	9.10632	9.94e-05	0.000599613	Neural	NA
236471_at	NFE2L3	9.06058	1.08e-07	1.78e-06	NA	NA
223775_at	HHIP	9.05923	9.34e-14	2.08e-11	NA	NA
228121_at	TGFB2	9.04727	7.15e-12	6.39e-10	NA	NA
214329_x_at	TNFSF10	9.0391	0.00026423	0.001383	NA	NA
209335_at	DCN	9.01894	0.00596888	0.0193163	NA	NA
219427_at	FAT4	8.99468	0.00475962	0.0160045	NA	NA
221044_s_at	TRIM34 /// TRIM6-TRIM34	8.98477	2.4e-13	4.38e-11	NA	NA
223599_at	TRIM6	8.98114	1.12e-15	7.54e-13	NA	NA
218499_at	RP6-213H19.1	8.93694	0.0238486	0.0602775	NA	NA
230466_s_at	---	8.89611	8.54e-07	1.03e-05	NA	NA
230083_at	USP53	8.8654	1.11e-05	9.21e-05	NA	NA
211813_x_at	DCN	8.84441	0.00765585	0.023701	NA	NA
232080_at	HECW2	8.83671	0.000145117	0.000829077	NA	NA
1568603_at	CADPS	8.81234	0.00645022	0.0205889	NA	NA
231867_at	ODZ2	8.81124	0.00211398	0.00811158	NA	NA
244779_at	---	8.79702	4.71e-12	4.58e-10	NA	NA
228360_at	LYPD6B	8.7942	0.00424654	0.0145697	NA	NA
201785_at	RNASE1	8.78948	0.0173845	0.0465018	NA	NA
218211_s_at	MLPH	8.78169	0.000843703	0.00372162	NA	NA
219771_at	TBC1D8B	8.78141	6.62e-10	2.54e-08	NA	NA
227001_at	NIPAL2	8.77658	6.57e-05	0.000420575	NA	NA
213142_x_at	PION	8.77618	1.33e-07	2.11e-06	NA	NA
235737_at	TSLP	8.7586	1.44e-10	7.33e-09	NA	NA
239719_at	CD109	8.73448	1.84e-09	5.96e-08	NA	NA
228570_at	BTBD11	8.72028	0.00277466	0.0102089	NA	NA
235371_at	GLT8D4	8.71572	5.44e-12	5.18e-10	NA	NA
202863_at	SP100	8.67508	1.93e-10	9.32e-09	Mesenchymal	NA
1559942_at	MDFIC	8.67097	0.000835188	0.00368912	NA	NA
203758_at	CTSO	8.65224	1.34e-10	6.89e-09	NA	NA
229900_at	CD109	8.64485	2.16e-10	1.02e-08	NA	NA
220014_at	PRR16	8.61541	0.00745487	0.0231957	NA	NA
219461_at	PAK6	8.59762	4.82e-05	0.00032227	NA	NA
205992_s_at	IL15	8.5809	6.5e-05	0.000417165	NA	NA
229308_at	---	8.53407	0.00723546	0.0226393	NA	NA
207299_s_at	GRM1	8.52874	0.000906008	0.00395402	Neural	NA
219778_at	ZFPM2	8.51478	0.0053067	0.0175155	NA	NA
243309_at	FLJ27352	8.42092	2.13e-12	2.45e-10	NA	NA
201468_s_at	NQO1	8.41868	2.07e-06	2.2e-05	NA	NA
242794_at	MAML3	8.41747	1.1e-07	1.8e-06	NA	NA
222150_s_at	PION	8.40181	1.82e-07	2.78e-06	NA	NA
202864_s_at	SP100	8.39739	1.45e-10	7.38e-09	Mesenchymal	NA
240770_at	TMEM171	8.37796	0.000234576	0.00124761	NA	NA
210138_at	RGS20	8.3734	1.97e-07	2.97e-06	NA	NA
1554018_at	GPNMB	8.36506	4.91e-05	0.000327825	NA	NA
238893_at	LOC338758	8.35973	3.16e-07	4.43e-06	NA	NA
204596_s_at	STC1	8.34459	1.93e-05	0.000147489	NA	NA
212192_at	KCTD12	8.31017	2.63e-07	3.8e-06	NA	NA
217513_at	C17orf60	8.29833	2.72e-06	2.77e-05	NA	NA
230263_s_at	DOCK5	8.2855	0.00458275	0.0155089	NA	NA
221900_at	COL8A2	8.27983	0.00381214	0.0133173	Mesenchymal	NA
201474_s_at	ITGA3	8.27253	2.38e-06	2.48e-05	NA	NA
233338_at	LOC284861	8.26924	7.6e-06	6.66e-05	NA	NA
228104_at	PLXNA4	8.26422	4.63e-09	1.28e-07	NA	NA
238852_at	---	8.24049	0.000124325	0.000726072	NA	NA
217728_at	S100A6	8.23837	2.82e-20	3.08e-16	NA	NA
205422_s_at	ITGBL1	8.23329	0.00622026	0.0199929	NA	NA
207002_s_at	PLAGL1	8.20374	0.0159901	0.0433853	NA	NA
210355_at	PTHLH	8.18716	4.14e-10	1.73e-08	NA	NA
200878_at	EPAS1	8.18686	4.02e-06	3.85e-05	NA	NA
242005_at	---	8.17627	5.81e-05	0.000378814	NA	NA
227727_at	MRGPRF	8.17485	0.0308038	0.0743312	NA	NA
203434_s_at	MME	8.17201	0.00481941	0.0161744	NA	NA
210305_at	PDE4DIP	8.15754	1.32e-14	4.59e-12	NA	NA
238909_at	S100A10	8.1485	4.23e-13	6.88e-11	NA	NA
227646_at	EBF1	8.1464	0.00499658	0.0166674	NA	NA
233011_at	ANXA1	8.13089	3.93e-06	3.79e-05	Mesenchymal	NA
238513_at	PRRG4	8.12783	3.53e-11	2.26e-09	NA	NA
227367_at	SLCO3A1	8.11951	1.43e-14	4.87e-12	NA	NA
226725_at	---	8.11843	0.00648167	0.0206687	NA	NA
228158_at	LOC645166 /// LOC654342	8.09572	2.05e-12	2.39e-10	NA	NA
204972_at	OAS2	8.09389	6.92e-08	1.23e-06	NA	NA
220301_at	CCDC102B	8.07572	7.28e-05	0.000459335	NA	NA
243366_s_at	---	8.06383	0.00801117	0.0245701	NA	NA
1555310_a_at	PAK6	8.04297	1.37e-05	0.000110161	NA	NA
39402_at	IL1B	8.03267	0.00782514	0.0241009	NA	NA
1555854_at	---	8.02651	2.1e-06	2.22e-05	NA	NA
228221_at	SLC44A3	7.98791	1.82e-13	3.52e-11	NA	NA
239884_at	CADPS	7.977	0.00367321	0.0129206	NA	NA
218035_s_at	RBM47	7.96884	2.34e-10	1.09e-08	Mesenchymal	NA
228749_at	ZDBF2	7.96246	2.95e-06	2.96e-05	NA	NA
213428_s_at	COL6A1	7.95216	6.2e-08	1.12e-06	NA	NA
221841_s_at	KLF4	7.95195	5.2e-10	2.09e-08	NA	NA
201042_at	TGM2	7.92576	2.86e-06	2.89e-05	NA	NA
202998_s_at	LOXL2	7.90461	2.05e-05	0.000155498	NA	NA
244387_at	---	7.90446	6.06e-07	7.74e-06	NA	NA
1555564_a_at	CFI	7.88686	3.44e-06	3.38e-05	NA	NA
204205_at	APOBEC3G	7.88113	6.45e-12	5.9e-10	NA	NA
223800_s_at	LIMS3	7.87284	0.00117623	0.00493671	NA	NA
227654_at	FAM65C	7.85764	0.0080121	0.0245702	NA	NA
219747_at	C4orf31	7.8557	1.12e-07	1.83e-06	NA	NA
212865_s_at	COL14A1	7.85302	0.00104517	0.00446476	NA	NA
209894_at	LEPR	7.84087	1.46e-09	4.94e-08	NA	NA
213275_x_at	CTSB	7.83084	1.5e-12	1.88e-10	Mesenchymal	NA
235102_x_at	---	7.82902	0.0191745	0.0504629	NA	NA
212188_at	KCTD12	7.82744	1.64e-06	1.8e-05	NA	NA
202458_at	PRSS23	7.82076	1.95e-09	6.25e-08	NA	NA
227947_at	PHACTR2	7.81494	0.00027105	0.00141148	NA	NA
214657_s_at	NEAT1	7.79401	4.07e-05	0.0002796	NA	NA
200838_at	CTSB	7.79388	2.06e-11	1.47e-09	Mesenchymal	NA
201279_s_at	DAB2	7.78251	0.000272128	0.0014162	Mesenchymal	NA
203387_s_at	TBC1D4	7.77893	1.2e-05	9.84e-05	NA	NA
243541_at	IL31RA	7.77805	3.18e-05	0.000226029	NA	NA
227828_s_at	FAM176A	7.76131	0.00451633	0.0153211	NA	NA
237301_at	---	7.75856	1.3e-09	4.47e-08	NA	NA
221530_s_at	BHLHE41	7.72308	8.93e-09	2.2e-07	NA	NA
222862_s_at	AK5	7.71237	0.00700618	0.022043	NA	NA
236565_s_at	LARP6	7.71046	2.25e-10	1.06e-08	NA	NA
223672_at	SGIP1	7.65353	4.64e-12	4.52e-10	NA	NA
208540_x_at	S100A11	7.63451	0.000587369	0.00273536	Mesenchymal	NA
229070_at	C6orf105	7.63327	0.010007	0.0294375	NA	NA
231725_at	PCDHB2	7.6288	0.000956572	0.00414148	NA	NA
229021_at	MCTP2	7.56855	0.000483493	0.00231906	NA	NA
201467_s_at	NQO1	7.56274	4.08e-08	7.86e-07	NA	NA
225651_at	UBE2E2	7.55399	2.94e-07	4.18e-06	NA	NA
229554_at	---	7.55188	0.00510748	0.0169778	NA	NA
235836_at	MXRA7	7.53606	3.59e-15	1.66e-12	NA	NA
209318_x_at	PLAGL1	7.53389	0.0141582	0.0392524	NA	NA
219308_s_at	AK5	7.52885	0.00325218	0.0116783	NA	NA
210279_at	GPR18	7.52761	0.00966538	0.0286301	NA	NA
203407_at	PPL	7.52498	0.000210985	0.00114135	NA	NA
213519_s_at	LAMA2	7.51261	8.76e-07	1.06e-05	NA	NA
209230_s_at	NUPR1	7.4812	1.45e-13	2.92e-11	NA	NA
209310_s_at	CASP4	7.4786	3.93e-08	7.63e-07	Mesenchymal	NA
218976_at	DNAJC12	7.47124	3.62e-06	3.53e-05	NA	NA
228574_at	TMTC2	7.47	0.000116646	0.00068665	NA	NA
209906_at	C3AR1	7.4691	1.6e-07	2.47e-06	NA	NA
228665_at	CYYR1	7.46512	0.00352526	0.012496	NA	NA
225600_at	C8orf83	7.45371	9.13e-10	3.33e-08	NA	NA
219368_at	NAP1L2	7.43713	0.00456494	0.0154592	NA	NA
205462_s_at	HPCAL1	7.42569	2.25e-05	0.000168544	NA	NA
203423_at	RBP1	7.42274	0.00021019	0.00113738	NA	NA
203408_s_at	SATB1	7.40867	0.000101944	0.000613181	Proneural	NA
229221_at	CD44	7.39823	1.24e-05	0.000101212	NA	NA
209228_x_at	TUSC3	7.3795	0.0114017	0.0328202	NA	NA
204920_at	CPS1	7.37339	2.95e-07	4.19e-06	NA	NA
204470_at	CXCL1	7.3657	0.0210336	0.0544307	NA	NA
228964_at	PRDM1	7.35635	3.48e-07	4.82e-06	NA	NA
228608_at	NALCN	7.35434	4.54e-15	1.95e-12	NA	NA
205067_at	IL1B	7.34156	0.00716791	0.0224729	NA	NA
229092_at	NR2F2	7.33471	9.74e-13	1.38e-10	NA	NA
230003_at	---	7.32452	0.00698858	0.0219939	NA	NA
226279_at	PRSS23	7.32055	1.32e-07	2.1e-06	NA	NA
210119_at	KCNJ15	7.31862	0.0072063	0.0225674	NA	NA
213524_s_at	G0S2	7.29606	1.23e-07	1.97e-06	NA	NA
217678_at	SLC7A11	7.29417	0.000108985	0.000648045	NA	NA
210136_at	MBP	7.29283	0.0098882	0.029159	Neural	NA
229105_at	GPR39	7.28201	0.002283	0.00866525	NA	NA
217564_s_at	CPS1	7.26885	1.13e-07	1.84e-06	NA	NA
205488_at	GZMA	7.26573	0.00671612	0.0212724	NA	NA
235643_at	SAMD9L	7.25544	1.04e-08	2.49e-07	NA	NA
210002_at	GATA6	7.25476	0.0160799	0.0435859	NA	NA
236088_at	NTNG1	7.24973	0.0160735	0.0435734	NA	NA
203001_s_at	STMN2	7.24113	0.00517345	0.0171458	NA	NA
231098_at	---	7.23945	0.000241065	0.00127707	NA	NA
227300_at	TMEM119	7.21749	0.0141033	0.0391499	NA	NA
202643_s_at	TNFAIP3	7.21437	4.85e-06	4.53e-05	Mesenchymal	NA
235355_at	---	7.20797	0.00215277	0.00823557	NA	NA
202508_s_at	SNAP25	7.20377	3.57e-07	4.94e-06	NA	NA
226731_at	PELO	7.18052	0.0107757	0.0313168	NA	NA
222446_s_at	BACE2	7.17639	0.00177585	0.00701185	NA	NA
227443_at	C9orf150	7.16756	0.000404586	0.00198838	NA	NA
233082_at	ZNF630	7.15922	1.48e-07	2.32e-06	NA	NA
226397_s_at	---	7.15529	2.28e-07	3.37e-06	NA	NA
217901_at	DSG2	7.12881	0.00422275	0.0145097	NA	NA
210519_s_at	NQO1	7.10932	1.78e-08	3.92e-07	NA	NA
209942_x_at	MAGEA3	7.1015	0.00359102	0.012685	NA	NA
205681_at	BCL2A1	7.09346	0.0066671	0.0211539	NA	NA
227314_at	ITGA2	7.0668	4.35e-11	2.69e-09	NA	NA
228716_at	THRB	7.06363	1.01e-08	2.43e-07	NA	NA
203543_s_at	KLF9	7.06108	2.14e-10	1.01e-08	NA	NA
202947_s_at	GYPC	7.04551	0.000578409	0.00270248	NA	NA
244455_at	KCNT2	7.0259	0.000151962	0.000862481	NA	NA
202644_s_at	TNFAIP3	7.0077	1.84e-06	1.98e-05	Mesenchymal	NA
238133_at	---	6.99977	0.0111718	0.0322655	NA	NA
37966_at	PARVB	6.99399	7.86e-15	3.05e-12	NA	NA
244631_at	LOC389834	6.96653	1.57e-12	1.94e-10	NA	NA
213572_s_at	SERPINB1	6.95195	3.84e-05	0.000265941	NA	NA
205076_s_at	MTMR11	6.92428	1.93e-07	2.91e-06	NA	NA
238621_at	FMN1	6.92292	1.08e-13	2.36e-11	NA	NA
219682_s_at	TBX3	6.91566	0.00516484	0.0171248	NA	NA
228855_at	NUDT7	6.91058	6.61e-06	5.92e-05	NA	NA
206254_at	EGF	6.89603	2.68e-10	1.22e-08	NA	NA
212338_at	MYO1D	6.89403	0.00448847	0.0152434	NA	NA
205139_s_at	UST	6.87718	0.00565495	0.0184577	NA	NA
226525_at	STK17B	6.85265	0.00464757	0.0156885	NA	NA
218217_at	SCPEP1	6.8488	8.99e-23	2.46e-18	Mesenchymal	NA
210664_s_at	TFPI	6.83351	1.01e-05	8.49e-05	NA	NA
202429_s_at	PPP3CA	6.82975	8.71e-12	7.44e-10	NA	NA
212552_at	HPCAL1	6.82315	4.48e-06	4.23e-05	NA	NA
219578_s_at	CPEB1	6.81237	2.22e-07	3.3e-06	NA	NA
235944_at	HMCN1	6.81172	0.00847884	0.0257345	NA	NA
205943_at	TDO2	6.80023	4.45e-07	5.95e-06	NA	NA
235337_at	---	6.78675	1.51e-06	1.68e-05	NA	NA
228557_at	L3MBTL4	6.77096	1e-08	2.42e-07	NA	NA
213373_s_at	CASP8	6.76892	2.15e-11	1.52e-09	Mesenchymal	NA
205364_at	ACOX2	6.76676	1.13e-07	1.85e-06	NA	NA
211991_s_at	HLA-DPA1	6.74812	7.9e-08	1.36e-06	NA	NA
201981_at	PAPPA	6.74175	0.00421163	0.0144761	NA	NA
231773_at	ANGPTL1	6.73812	5.09e-09	1.38e-07	NA	NA
214040_s_at	GSN	6.71604	1.68e-09	5.51e-08	NA	NA
205110_s_at	FGF13	6.70212	0.0065021	0.020723	NA	NA
227372_s_at	BAIAP2L1	6.69008	0.00378289	0.0132345	NA	NA
213258_at	TFPI	6.67747	4.22e-05	0.000288692	NA	NA
203184_at	FBN2	6.66544	0.000404963	0.00198934	NA	NA
228377_at	KLHL14	6.66381	0.0199757	0.0522319	NA	NA
214455_at	HIST1H2BC	6.65695	1.93e-08	4.2e-07	NA	NA
1568604_a_at	CADPS	6.64427	0.0248767	0.0623857	NA	NA
202686_s_at	AXL	6.64421	0.00072148	0.00325846	NA	NA
237939_at	EPHA5	6.64171	0.00794468	0.0244017	NA	NA
208763_s_at	TSC22D3	6.63963	5.28e-13	8.17e-11	NA	NA
235775_at	TMTC2	6.62824	5.67e-05	0.000371592	NA	NA
209803_s_at	PHLDA2	6.61064	0.000519894	0.00246682	NA	NA
230100_x_at	PAK1	6.59255	5.79e-05	0.000377908	NA	NA
212472_at	MICAL2	6.58937	0.000681119	0.0031049	NA	NA
204235_s_at	GULP1	6.58631	0.000467621	0.00225341	NA	NA
224942_at	PAPPA	6.56666	0.00547101	0.0179581	NA	NA
201110_s_at	THBS1	6.56088	0.0498529	0.110112	Mesenchymal	NA
239132_at	NOS1	6.54324	0.00620156	0.0199441	NA	NA
219557_s_at	NRIP3	6.54186	3.98e-05	0.000274098	NA	NA
209676_at	TFPI	6.52807	5.94e-07	7.61e-06	NA	NA
231807_at	KIAA1217	6.50096	3.79e-10	1.61e-08	NA	NA
237212_at	---	6.49212	1.6e-05	0.000126257	NA	NA
207057_at	SLC16A7	6.49043	0.0070984	0.0222857	Neural	NA
222670_s_at	MAFB	6.48908	1.05e-06	1.24e-05	Mesenchymal	NA
213110_s_at	COL4A5	6.47715	0.0264393	0.0655437	NA	NA
221276_s_at	SYNC	6.46874	0.00018088	0.000999862	NA	NA
218638_s_at	SPON2	6.46307	0.00108003	0.0045879	NA	NA
227265_at	FGL2	6.45977	0.00267535	0.00990351	NA	NA
232166_at	KIAA1377	6.45136	1.41e-12	1.78e-10	NA	NA
1554997_a_at	PTGS2	6.44246	0.0201254	0.0525279	NA	NA
204163_at	EMILIN1	6.44134	1.78e-06	1.93e-05	NA	NA
204526_s_at	TBC1D8	6.43469	6.32e-08	1.14e-06	NA	NA
206300_s_at	PTHLH	6.39907	4.07e-09	1.16e-07	NA	NA
241763_s_at	FBXO32	6.38981	0.000214716	0.00115729	NA	NA
229776_at	SLCO3A1	6.36665	1.89e-13	3.6e-11	NA	NA
209120_at	NR2F2	6.35932	1.35e-09	4.65e-08	NA	NA
210735_s_at	CA12	6.35441	3.19e-13	5.47e-11	NA	NA
227688_at	LRCH2	6.35085	6.95e-05	0.000441212	NA	NA
235458_at	HAVCR2	6.34593	0.0171525	0.0459915	NA	NA
207177_at	PTGFR	6.34386	0.00948919	0.0282198	NA	NA
229029_at	---	6.337	8.14e-08	1.4e-06	NA	NA
228772_at	HNMT	6.32752	7.08e-05	0.000448189	NA	NA
214433_s_at	SELENBP1	6.32425	1.58e-08	3.56e-07	NA	NA
213167_s_at	SLC5A3	6.32128	1.36e-09	4.67e-08	NA	NA
219501_at	ENOX1	6.28646	4e-05	0.000275477	NA	NA
219033_at	PARP8	6.27432	2.79e-11	1.86e-09	Neural	NA
221030_s_at	ARHGAP24	6.26269	0.000687457	0.00312883	NA	NA
209868_s_at	RBMS1	6.26176	2.19e-06	2.31e-05	Mesenchymal	NA
219561_at	COPZ2	6.25563	3.37e-11	2.18e-09	Mesenchymal	NA
227566_at	NTM	6.24707	0.0926587	0.180141	NA	NA
222496_s_at	RBM47	6.2466	9.31e-09	2.27e-07	Mesenchymal	NA
219806_s_at	C11orf75	6.24043	3.78e-05	0.000262584	NA	NA
236651_at	KALRN	6.22611	0.00039869	0.00196205	NA	NA
1552658_a_at	NAV3	6.19874	0.00130041	0.00537457	NA	NA
204136_at	COL7A1	6.19698	0.000757429	0.00339335	NA	NA
207018_s_at	RAB27B	6.19672	0.00459352	0.0155415	NA	NA
239058_at	---	6.19025	0.00138573	0.00567781	NA	NA
204508_s_at	CA12	6.18456	1.16e-12	1.55e-10	NA	NA
203851_at	IGFBP6	6.18318	0.000263892	0.00138136	Mesenchymal	NA
227623_at	---	6.17136	0.00829074	0.025273	NA	NA
229331_at	SPATA18	6.16294	0.00360816	0.0127324	NA	NA
203888_at	THBD	6.15782	0.00649887	0.0207151	Mesenchymal	NA
209679_s_at	SMAGP	6.15382	1.67e-05	0.000130633	NA	NA
201389_at	ITGA5	6.1484	1.72e-05	0.000133807	Mesenchymal	NA
210223_s_at	MR1	6.14801	7.21e-09	1.84e-07	NA	NA
221577_x_at	GDF15 /// LOC100292463	6.12919	0.00270773	0.0100071	NA	NA
230147_at	F2RL2	6.12105	0.00283811	0.0104171	NA	NA
213845_at	GRIK2	6.11414	1.23e-06	1.41e-05	NA	NA
225016_at	APCDD1	6.10951	0.00184848	0.00725631	NA	NA
1554830_a_at	STEAP3	6.10767	1.86e-08	4.06e-07	NA	NA
241198_s_at	C11orf70	6.1057	8.84e-07	1.06e-05	NA	NA
1556329_a_at	---	6.10457	0.010368	0.0303302	NA	NA
229253_at	THEM4	6.10155	0.000219555	0.00117942	NA	NA
214612_x_at	MAGEA6	6.09773	0.00884079	0.0266422	NA	NA
204491_at	PDE4D	6.09562	0.000124865	0.00072868	NA	NA
224370_s_at	CAPS2	6.09082	2.77e-08	5.71e-07	NA	NA
211986_at	AHNAK	6.07306	6.95e-06	6.18e-05	NA	NA
209700_x_at	PDE4DIP	6.07075	3.38e-07	4.7e-06	NA	NA
216092_s_at	SLC7A8	6.05974	1.3e-08	3.01e-07	NA	NA
206295_at	IL18	6.05135	1.48e-05	0.000117824	NA	NA
222450_at	PMEPA1	6.04356	0.00250354	0.00936514	NA	NA
204518_s_at	PPIC	6.04081	1.28e-06	1.46e-05	NA	NA
243278_at	---	6.03522	0.00430006	0.0147162	NA	NA
203748_x_at	RBMS1	6.0136	2.96e-06	2.97e-05	Mesenchymal	NA
230127_at	---	6.00412	0.000260583	0.0013656	NA	NA
204517_at	PPIC	5.99706	1.15e-06	1.33e-05	NA	NA
211958_at	IGFBP5	5.99443	1.91e-05	0.000146226	NA	NA
213455_at	FAM114A1	5.96505	6.66e-06	5.95e-05	NA	NA
222903_s_at	CPEB1	5.94697	9.66e-07	1.15e-05	NA	NA
208747_s_at	C1S	5.93481	0.00678675	0.0214539	NA	NA
205885_s_at	ITGA4	5.92076	0.00522382	0.0172763	Mesenchymal	NA
204424_s_at	LMO3	5.91961	0.0267949	0.0662481	NA	NA
206645_s_at	NR0B1	5.9128	0.00513182	0.0170453	Proneural	NA
211478_s_at	DPP4	5.91245	3.48e-07	4.82e-06	NA	NA
1558846_at	PNLIPRP3	5.89666	5.39e-12	5.15e-10	NA	NA
226507_at	PAK1	5.89165	3.61e-07	4.98e-06	NA	NA
242546_at	FLJ39632	5.8827	2.58e-07	3.74e-06	NA	NA
207943_x_at	PLAGL1	5.8809	0.0165391	0.0446005	NA	NA
1558945_s_at	CACNA1A	5.86177	0.00469941	0.0158283	NA	NA
60474_at	FERMT1	5.857	0.00375184	0.0131478	NA	NA
204485_s_at	TOM1L1	5.85119	1.73e-05	0.00013447	NA	NA
203000_at	STMN2	5.85069	0.00660319	0.0209901	NA	NA
227850_x_at	CDC42EP5	5.84585	2.3e-05	0.000171797	NA	NA
230720_at	RNF182	5.84302	5.63e-10	2.24e-08	NA	NA
202796_at	SYNPO	5.81937	8.29e-06	7.16e-05	NA	NA
202638_s_at	ICAM1	5.81027	1.39e-05	0.000111552	NA	NA
1557080_s_at	ITGBL1	5.80557	0.00395565	0.0137413	NA	NA
225328_at	---	5.80412	0.00770107	0.0237978	NA	NA
224996_at	ASPH	5.79605	2.34e-08	4.93e-07	NA	NA
204254_s_at	VDR	5.79258	0.000973957	0.00420625	Mesenchymal	NA
207266_x_at	RBMS1	5.78562	1.52e-06	1.69e-05	Mesenchymal	NA
244008_at	---	5.78006	7.05e-06	6.25e-05	NA	NA
1557049_at	LOC149478	5.77659	1.6e-11	1.19e-09	NA	NA
201147_s_at	TIMP3	5.76695	0.0353203	0.0831338	NA	NA
225407_at	MBP	5.76662	0.00807801	0.0247473	Neural	NA
228750_at	---	5.76566	0.00133296	0.00548544	NA	NA
1556134_a_at	B3GNT5	5.75895	0.000110385	0.000654448	NA	NA
205673_s_at	ASB9	5.74809	3.82e-06	3.7e-05	NA	NA
205830_at	CLGN	5.74744	0.0595821	0.127118	Proneural	NA
235086_at	THBS1	5.73867	0.00785577	0.0241776	Mesenchymal	NA
1553027_a_at	KLHL4	5.73446	7.41e-07	9.19e-06	Classical	NA
205884_at	ITGA4	5.7309	0.00533666	0.0175963	Mesenchymal	NA
239352_at	SLC6A15	5.72312	0.00386728	0.013478	NA	NA
209755_at	NMNAT2	5.71405	5.88e-06	5.35e-05	NA	NA
204979_s_at	SH3BGR	5.68779	8.07e-10	3e-08	NA	NA
220941_s_at	C21orf91	5.68305	8.23e-10	3.05e-08	NA	NA
203717_at	DPP4	5.67494	3.54e-07	4.9e-06	NA	NA
230869_at	FAM155A	5.67432	0.0320824	0.0769101	NA	NA
225008_at	ASPH	5.66937	1.63e-06	1.8e-05	NA	NA
230383_x_at	---	5.65967	0.0127657	0.0360593	NA	NA
204160_s_at	ENPP4	5.65279	0.00494362	0.0165226	Neural	NA
227856_at	C4orf32	5.6527	0.00939546	0.0279867	NA	NA
227154_at	IGSF21	5.65159	0.0118997	0.034012	NA	NA
203424_s_at	IGFBP5	5.64592	2.48e-06	2.56e-05	NA	NA
226506_at	THSD4	5.64532	9.63e-13	1.37e-10	NA	NA
227051_at	---	5.63641	0.00620325	0.0199484	NA	NA
209788_s_at	ERAP1	5.63531	4.43e-08	8.41e-07	NA	NA
239108_at	FAR2	5.6343	0.000502665	0.00239651	NA	NA
223591_at	RNF135	5.62485	0.00158119	0.00635533	NA	NA
231270_at	CA13	5.62225	1.71e-07	2.62e-06	NA	NA
218796_at	FERMT1	5.62019	0.00499146	0.016654	NA	NA
201150_s_at	TIMP3	5.61059	0.0320944	0.0769194	NA	NA
1554741_s_at	FGF7 /// KGFLP1 /// KGFLP2	5.60347	1.06e-07	1.75e-06	NA	NA
221447_s_at	GLT8D2	5.60088	0.00543319	0.0178607	NA	NA
209119_x_at	NR2F2	5.59832	1.74e-08	3.86e-07	NA	NA
201162_at	IGFBP7	5.59643	3.07e-08	6.23e-07	NA	NA
204932_at	TNFRSF11B	5.58201	0.00219467	0.00837418	NA	NA
213895_at	EMP1	5.57802	0.00114083	0.00480544	NA	NA
227062_at	NEAT1	5.55754	8.78e-11	4.84e-09	NA	NA
226632_at	CYGB	5.55441	0.0055991	0.0182989	NA	NA
227955_s_at	EFNA5	5.54332	0.00811873	0.0248386	NA	NA
200839_s_at	CTSB	5.54101	4.74e-13	7.5e-11	Mesenchymal	NA
1553118_at	THEM4	5.54081	6.71e-05	0.00042829	NA	NA
201163_s_at	IGFBP7	5.53288	9.13e-08	1.54e-06	NA	NA
229606_at	---	5.52794	2.2e-11	1.54e-09	NA	NA
220994_s_at	STXBP6	5.52689	0.00219701	0.00838194	NA	NA
208096_s_at	COL21A1	5.52372	0.0436653	0.0988758	NA	NA
238429_at	TMEM71	5.5221	3.72e-05	0.000259142	NA	NA
203726_s_at	LAMA3	5.51768	1.74e-05	0.000135504	NA	NA
219263_at	RNF128	5.51175	0.0638223	0.134201	NA	NA
201721_s_at	LAPTM5	5.5117	0.00236539	0.00892962	Mesenchymal	NA
214297_at	CSPG4	5.50608	0.000343455	0.00172659	NA	NA
203417_at	MFAP2	5.49992	0.0193107	0.0507529	NA	NA
204688_at	SGCE	5.49356	6.27e-06	5.64e-05	NA	NA
201028_s_at	CD99	5.47912	4.69e-16	3.51e-13	NA	NA
202457_s_at	PPP3CA	5.47415	1.97e-10	9.47e-09	NA	NA
203320_at	SH2B3	5.47263	6.59e-07	8.32e-06	Mesenchymal	NA
202411_at	IFI27	5.47155	0.00566621	0.01849	NA	NA
230240_at	---	5.46538	3.79e-10	1.61e-08	NA	NA
202481_at	DHRS3	5.455	0.00119319	0.00499828	NA	NA
1556200_a_at	C10orf90	5.45224	0.00247638	0.00928197	NA	NA
38241_at	BTN3A3	5.45049	1.25e-09	4.32e-08	NA	NA
213249_at	FBXL7	5.442	0.00141728	0.00578584	NA	NA
212091_s_at	COL6A1	5.43365	3.17e-05	0.000225201	NA	NA
215440_s_at	BEX4	5.42644	1.41e-08	3.21e-07	NA	NA
207819_s_at	ABCB4	5.42349	7.84e-07	9.62e-06	NA	NA
214853_s_at	SHC1	5.41861	6.92e-15	2.8e-12	Mesenchymal	NA
242051_at	---	5.41639	7.21e-09	1.84e-07	NA	NA
242481_at	---	5.41573	0.0011288	0.00476176	NA	NA
228531_at	SAMD9	5.41196	1.25e-05	0.000101753	NA	NA
210842_at	NRP2	5.40846	1.44e-08	3.27e-07	NA	NA
209163_at	CYB561	5.40637	6.15e-11	3.6e-09	NA	NA
223696_at	ARSD	5.39825	3.67e-13	6.14e-11	NA	NA
227834_at	TXLNB	5.39609	7.92e-11	4.46e-09	NA	NA
227475_at	FOXQ1	5.39492	0.00527903	0.0174431	NA	NA
229523_at	TTMA	5.38913	2.58e-05	0.000188943	NA	NA
217757_at	A2M	5.38408	0.014525	0.0400664	NA	NA
209615_s_at	PAK1	5.38361	7.5e-08	1.31e-06	NA	NA
205567_at	CHST1	5.38165	0.00662388	0.0210424	NA	NA
210665_at	TFPI	5.3759	2.67e-05	0.000194523	NA	NA
1566342_at	SOD2	5.37212	5.68e-09	1.51e-07	NA	NA
225803_at	FBXO32	5.36819	0.000736763	0.00331371	NA	NA
219371_s_at	KLF2	5.36611	3.42e-05	0.000240824	NA	NA
202878_s_at	CD93	5.36441	7.48e-08	1.31e-06	NA	NA
217867_x_at	BACE2	5.36431	0.00458075	0.0155032	NA	NA
235044_at	CYYR1	5.36394	0.00554765	0.0181704	NA	NA
241470_x_at	---	5.36156	0.00613385	0.0197706	NA	NA
226899_at	UNC5B	5.35164	0.002015	0.00778038	NA	NA
215101_s_at	CXCL5	5.3457	0.00401567	0.0139101	NA	NA
1561123_at	---	5.34211	0.000176037	0.000977436	NA	NA
233233_at	---	5.33593	9.28e-06	7.86e-05	NA	NA
234932_s_at	CDCP1	5.3356	0.00539956	0.0177747	Mesenchymal	NA
201149_s_at	TIMP3	5.33164	0.0202689	0.0528188	NA	NA
205350_at	CRABP1	5.33101	0.0129731	0.0365622	NA	NA
203400_s_at	TF	5.3255	0.0194686	0.0511311	NA	NA
235030_at	FAM55C	5.32441	1.01e-10	5.5e-09	NA	NA
221558_s_at	LEF1	5.32407	0.012029	0.0343045	NA	NA
228737_at	TOX2	5.32193	4.46e-08	8.46e-07	NA	NA
210118_s_at	IL1A	5.32158	0.000590108	0.00274425	NA	NA
236193_at	HIST1H2BC	5.31421	7.14e-09	1.83e-07	NA	NA
1558199_at	FN1	5.30284	0.000337937	0.00170418	NA	NA
240419_at	SLC6A15	5.29964	0.00699387	0.0220093	NA	NA
225269_s_at	RBMS1	5.29593	4.15e-06	3.96e-05	Mesenchymal	NA
235352_at	---	5.29552	1.93e-10	9.31e-09	NA	NA
209706_at	NKX3-1	5.29337	1.11e-08	2.63e-07	NA	NA
202274_at	ACTG2	5.289	0.0423199	0.096414	NA	NA
231828_at	LOC253039	5.28438	1.01e-05	8.46e-05	NA	NA
228962_at	PDE4D	5.28432	0.000101368	0.000610117	NA	NA
1555229_a_at	C1S	5.25873	0.00670036	0.0212348	NA	NA
243856_at	---	5.25363	1.1e-06	1.29e-05	NA	NA
208869_s_at	GABARAPL1	5.25149	6.65e-13	9.93e-11	NA	NA
204048_s_at	PHACTR2	5.2401	0.000681054	0.00310486	NA	NA
209921_at	SLC7A11	5.23847	0.000137302	0.000791626	NA	NA
203963_at	CA12	5.22385	4.46e-13	7.15e-11	NA	NA
219956_at	GALNT6	5.22253	0.0362739	0.0849806	NA	NA
230585_at	---	5.22194	0.00373147	0.0130907	NA	NA
205116_at	LAMA2	5.22166	8.78e-06	7.51e-05	NA	NA
213543_at	SGCD	5.21434	0.00264663	0.00981315	NA	NA
202733_at	P4HA2	5.19878	8.94e-08	1.51e-06	Mesenchymal	NA
201331_s_at	STAT6	5.19736	0.00428265	0.0146704	Mesenchymal	NA
206101_at	ECM2	5.1948	1.6e-07	2.48e-06	NA	NA
206746_at	BFSP1	5.18319	4.13e-10	1.73e-08	NA	NA
205083_at	AOX1	5.1758	0.00406255	0.0140476	NA	NA
212937_s_at	COL6A1	5.17335	4.66e-05	0.000313104	NA	NA
205081_at	CRIP1	5.16603	0.00202218	0.0078059	NA	NA
219858_s_at	MFSD6	5.16499	0.000119212	0.00069935	NA	NA
222900_at	NRIP3	5.16462	8.4e-06	7.25e-05	NA	NA
202425_x_at	PPP3CA	5.16327	1.22e-11	9.63e-10	NA	NA
244119_at	LOC283483	5.1589	0.00464176	0.0156717	NA	NA
232122_s_at	VEPH1	5.1462	0.0141189	0.0391816	NA	NA
204161_s_at	ENPP4	5.14223	0.00631163	0.0202299	Neural	NA
210643_at	TNFSF11	5.1354	0.00626927	0.0201164	NA	NA
236616_at	---	5.13473	0.000197727	0.00108075	NA	NA
217523_at	CD44	5.12341	0.000385249	0.00190568	NA	NA
209970_x_at	CASP1	5.11632	3.45e-06	3.39e-05	Mesenchymal	NA
1558930_at	LOC728192	5.10522	1.36e-13	2.82e-11	NA	NA
213496_at	LPPR4	5.10475	0.00352539	0.012496	NA	NA
225345_s_at	---	5.10239	0.00788725	0.024258	NA	NA
212647_at	RRAS	5.10105	3.55e-07	4.91e-06	Mesenchymal	NA
200770_s_at	LAMC1	5.09726	6.16e-12	5.71e-10	NA	NA
231882_at	FLJ39632	5.09627	3.46e-08	6.86e-07	NA	NA
242931_at	LONRF3	5.09604	3.48e-07	4.82e-06	NA	NA
201069_at	MMP2	5.09542	0.00259272	0.00964266	NA	NA
218424_s_at	STEAP3	5.08451	5.95e-07	7.63e-06	NA	NA
214866_at	PLAUR	5.08439	0.0162661	0.0440185	Mesenchymal	NA
211458_s_at	GABARAPL1 /// GABARAPL3	5.08061	1.32e-13	2.73e-11	NA	NA
225646_at	CTSC	5.07967	6.15e-10	2.4e-08	Mesenchymal	NA
205603_s_at	DIAPH2	5.07839	0.00332474	0.0118966	NA	NA
220253_s_at	LRP12	5.07165	1.52e-10	7.63e-09	NA	NA
228150_at	SEC16B	5.06397	1.52e-12	1.9e-10	NA	NA
204726_at	CDH13	5.05606	0.0457661	0.102742	NA	NA
229285_at	RNASEL	5.05449	1.02e-07	1.7e-06	NA	NA
202862_at	FAH	5.05293	1.12e-12	1.53e-10	NA	NA
228498_at	---	5.05123	1.61e-07	2.49e-06	NA	NA
212713_at	MFAP4	5.05002	0.0144564	0.0399113	NA	NA
1555800_at	ZNF385B	5.04782	0.00432832	0.0147916	NA	NA
208982_at	PECAM1	5.0475	1.15e-06	1.33e-05	NA	NA
204821_at	BTN3A3	5.04371	4.9e-10	1.99e-08	NA	NA
203180_at	ALDH1A3	5.04322	0.0853265	0.168773	NA	NA
203072_at	MYO1E	5.04109	1.96e-09	6.25e-08	NA	NA
220016_at	AHNAK	5.03927	0.000517993	0.00245951	NA	NA
230659_at	---	5.03536	2.08e-15	1.08e-12	NA	NA
202450_s_at	CTSK	5.03126	1.16e-13	2.48e-11	NA	NA
209655_s_at	TMEM47	5.03013	0.0151281	0.0414434	NA	NA
238169_at	---	5.0299	1.94e-12	2.3e-10	NA	NA
221903_s_at	CYLD	5.02556	9.71e-15	3.64e-12	NA	NA
238732_at	COL24A1	5.01362	0.00755618	0.0234482	NA	NA
242577_at	LOC389834	5.00844	8.24e-12	7.19e-10	NA	NA
205756_s_at	F8	5.00799	5.11e-14	1.26e-11	NA	NA
1568611_at	---	5.00685	5.8e-05	0.000378683	NA	NA
238865_at	PABPC4L	5.00654	0.00419782	0.014434	NA	NA
219257_s_at	SPHK1	5.00509	5.34e-06	4.92e-05	NA	NA
230493_at	SHISA2	5.00397	0.000750728	0.00336775	NA	NA
204049_s_at	PHACTR2	5.00262	0.0011441	0.00481699	NA	NA
239433_at	LRRC8E	5.00234	0.000944083	0.00409372	NA	NA
229657_at	THRB	5.00178	1.23e-08	2.88e-07	NA	NA
244532_x_at	---	5.00117	9.64e-14	2.14e-11	NA	NA
227554_at	---	4.99814	0.00705195	0.0221628	NA	NA
220254_at	LRP12	4.99324	5.45e-09	1.47e-07	NA	NA
218552_at	ECHDC2	4.99132	2.25e-05	0.000168488	NA	NA
235201_at	---	4.98668	0.00251189	0.00939253	NA	NA
230161_at	---	4.98344	2.95e-06	2.96e-05	NA	NA
240715_at	TBX5	4.98065	0.00359201	0.0126872	NA	NA
221814_at	GPR124	4.97754	0.00560195	0.0183054	NA	NA
205316_at	SLC15A2	4.97666	0.0126733	0.0358318	NA	NA
212631_at	STX7	4.97658	3.77e-10	1.61e-08	NA	NA
242230_at	ATXN1	4.968	1.08e-07	1.78e-06	NA	NA
217540_at	FAM55C	4.96738	5.43e-12	5.18e-10	NA	NA
210951_x_at	RAB27A	4.96735	1.82e-13	3.52e-11	Mesenchymal	NA
235092_at	---	4.96645	6.72e-06	6.01e-05	NA	NA
243109_at	MCTP2	4.96363	0.00580182	0.0188549	NA	NA
224367_at	BEX2	4.96292	1.73e-06	1.89e-05	NA	NA
231993_at	ITGBL1	4.96249	0.0049952	0.0166644	NA	NA
1555801_s_at	ZNF385B	4.96209	0.00808437	0.0247626	NA	NA
227038_at	SGMS2	4.96148	0.00991637	0.0292263	NA	NA
222877_at	---	4.95995	6.46e-06	5.8e-05	NA	NA
1552648_a_at	TNFRSF10A	4.95513	0.00112666	0.00475456	NA	NA
236824_at	TMEM132B	4.95473	0.0322741	0.0772721	NA	NA
224443_at	C1orf97	4.95054	6.9e-12	6.25e-10	NA	NA
238755_at	---	4.94978	0.00125137	0.00520529	NA	NA
212706_at	LOC100286937 /// LOC100287164 /// RASA4	4.94932	4.56e-08	8.61e-07	NA	NA
222392_x_at	PERP	4.92366	0.0769043	0.155524	NA	NA
227863_at	CTSD	4.92179	6.24e-06	5.62e-05	NA	NA
226909_at	ZNF518B	4.92177	0.00798683	0.0245078	NA	NA
232034_at	LOC203274	4.91598	2.6e-06	2.67e-05	NA	NA
205372_at	PLAG1	4.91494	0.00290562	0.0106307	NA	NA
217914_at	TPCN1	4.91426	3.8e-11	2.41e-09	NA	NA
236325_at	KIAA1377	4.91322	4.15e-07	5.6e-06	NA	NA
201109_s_at	THBS1	4.91078	0.0602781	0.128353	Mesenchymal	NA
219959_at	MOCOS	4.90511	6.29e-05	0.000405558	NA	NA
229487_at	EBF1	4.90256	0.00386336	0.0134678	NA	NA
229831_at	CNTN3	4.90197	0.00797559	0.0244802	NA	NA
244091_at	---	4.88961	0.00788934	0.024259	NA	NA
214995_s_at	APOBEC3F /// APOBEC3G	4.88508	7.31e-12	6.52e-10	NA	NA
227290_at	---	4.88165	0.00808987	0.0247753	NA	NA
229096_at	LIMS3 /// LIMS3-LOC440895 /// LOC440895	4.88037	0.00221156	0.00843155	NA	NA
210652_s_at	TTC39A	4.87814	0.00368666	0.0129584	NA	NA
228635_at	PCDH10	4.87275	0.0328818	0.0784488	NA	NA
204463_s_at	EDNRA	4.86727	0.00517605	0.0171516	NA	NA
218541_s_at	C8orf4	4.86119	5.08e-07	6.65e-06	NA	NA
226885_at	---	4.85973	0.0198218	0.0519114	NA	NA
210613_s_at	SYNGR1	4.85296	6.59e-05	0.000421752	NA	NA
216250_s_at	LPXN	4.84513	0.0210824	0.054539	NA	NA
227253_at	CP	4.8387	0.00663752	0.0210747	NA	NA
209121_x_at	NR2F2	4.8381	1.27e-07	2.04e-06	NA	NA
224817_at	SH3PXD2A	4.83525	3.98e-08	7.7e-07	NA	NA
232073_at	PPFIA2	4.83053	0.0106595	0.0310235	Neural	NA
1568765_at	SERPINE1	4.82614	1.3e-06	1.48e-05	Mesenchymal	Mesenchymal
209238_at	STX3	4.8259	5.07e-07	6.64e-06	NA	NA
203997_at	PTPN3	4.81981	0.000769303	0.00343894	NA	NA
214581_x_at	TNFRSF21	4.81678	1.02e-06	1.21e-05	NA	NA
215867_x_at	CA12	4.80675	1.59e-11	1.19e-09	NA	NA
210367_s_at	PTGES	4.80435	3.07e-05	0.000219697	NA	NA
235629_at	---	4.79435	0.00163672	0.00654887	NA	NA
229349_at	LIN28B	4.79088	0.00450385	0.0152845	NA	NA
217744_s_at	PERP	4.78957	0.0359506	0.0843642	NA	NA
214930_at	SLITRK5	4.78868	0.0422258	0.0962318	NA	NA
229973_at	C1orf173	4.7772	0.0211242	0.0546291	NA	NA
204948_s_at	FST	4.7772	0.00227201	0.00862894	NA	NA
206653_at	POLR3G	4.77609	1.1e-10	5.87e-09	NA	NA
224583_at	COTL1	4.7727	9.09e-09	2.23e-07	NA	NA
218876_at	TPPP3	4.77227	1.98e-06	2.12e-05	NA	NA
201148_s_at	TIMP3	4.77028	0.0158245	0.0430365	NA	NA
232263_at	SLC6A15	4.76702	0.00851318	0.0258229	NA	NA
224444_s_at	C1orf97	4.76642	2.12e-13	3.97e-11	NA	NA
223027_at	SNX9	4.75977	2.28e-06	2.38e-05	NA	NA
211367_s_at	CASP1	4.75776	2.74e-05	0.000199059	Mesenchymal	NA
228565_at	KIAA1804	4.75738	1.73e-09	5.65e-08	NA	NA
214130_s_at	PDE4DIP	4.75503	2.77e-11	1.85e-09	NA	NA
219655_at	C7orf10	4.75343	0.00469844	0.0158269	NA	NA
1552575_a_at	C6orf141	4.74882	3.69e-14	9.79e-12	NA	NA
57082_at	LDLRAP1	4.74849	2.65e-06	2.71e-05	NA	NA
201596_x_at	KRT18	4.74671	9.36e-07	1.12e-05	NA	NA
213353_at	ABCA5	4.74636	1.42e-05	0.000113544	NA	NA
226932_at	SSPN	4.74547	4.05e-07	5.48e-06	NA	NA
212086_x_at	LMNA	4.74539	2.17e-06	2.28e-05	NA	NA
200766_at	CTSD	4.73786	3.71e-12	3.78e-10	NA	NA
225728_at	SORBS2	4.73666	0.027366	0.0673655	NA	NA
208653_s_at	CD164	4.73574	3.24e-07	4.54e-06	NA	NA
204736_s_at	CSPG4	4.73381	0.000136184	0.000786198	NA	NA
228956_at	UGT8	4.72321	0.0203824	0.0530665	Neural	NA
242465_at	---	4.72315	0.00864512	0.0261607	NA	NA
213164_at	SLC5A3	4.71316	1.76e-10	8.63e-09	NA	NA
203798_s_at	VSNL1	4.7119	0.0220108	0.056518	NA	NA
238692_at	BTBD11	4.71164	0.0100833	0.029621	NA	NA
244359_s_at	---	4.71114	2.23e-13	4.12e-11	NA	NA
230482_at	ST6GALNAC5	4.70624	0.000209109	0.00113255	NA	NA
232155_at	KIAA1618	4.70368	4.11e-10	1.72e-08	NA	NA
201749_at	ECE1	4.701	6.63e-10	2.54e-08	NA	NA
244114_x_at	---	4.69717	1.41e-12	1.78e-10	NA	NA
1557411_s_at	SLC25A43	4.69712	1.05e-07	1.73e-06	NA	NA
204500_s_at	AGTPBP1	4.69239	0.00300208	0.0109236	Neural	NA
213372_at	PAQR3	4.69198	9.26e-10	3.37e-08	NA	NA
222449_at	PMEPA1	4.69149	0.00678529	0.021453	NA	NA
235236_at	LOC100131897	4.6901	0.00928016	0.0277112	NA	NA
204963_at	SSPN	4.69005	1.73e-06	1.89e-05	NA	NA
215127_s_at	RBMS1	4.68207	3.73e-06	3.62e-05	Mesenchymal	NA
205694_at	TYRP1	4.67056	0.000468048	0.00225527	NA	NA
219582_at	OGFRL1	4.67038	2.41e-06	2.5e-05	NA	NA
206271_at	TLR3	4.66632	0.000240968	0.00127689	NA	NA
214164_x_at	CA12	4.66556	1.72e-11	1.26e-09	NA	NA
219355_at	CXorf57	4.66379	0.0116718	0.0334692	NA	NA
218856_at	TNFRSF21	4.6569	2.73e-07	3.92e-06	NA	NA
204719_at	ABCA8	4.65128	0.0536743	0.116941	NA	NA
224928_at	SETD7	4.64827	3.18e-11	2.07e-09	NA	NA
238063_at	TMEM154	4.64212	1.27e-06	1.45e-05	NA	NA
212944_at	SLC5A3	4.64051	3.15e-12	3.36e-10	NA	NA
219157_at	KLHL2	4.63029	1.36e-10	6.99e-09	NA	NA
215716_s_at	ATP2B1	4.62715	1.19e-15	7.76e-13	NA	NA
231175_at	BEND6	4.62597	0.000651808	0.00298948	NA	NA
219691_at	SAMD9	4.62595	1.99e-06	2.12e-05	NA	NA
1553605_a_at	ABCA13	4.62176	0.00661347	0.021013	NA	NA
226558_at	LOC389834	4.61091	2.66e-07	3.83e-06	NA	NA
227503_at	---	4.61047	5.19e-05	0.000344075	NA	NA
220122_at	MCTP1	4.60203	0.000898155	0.00392476	NA	NA
204933_s_at	TNFRSF11B	4.60098	0.00741804	0.0231101	NA	NA
235606_at	LOC344595	4.59917	3.43e-05	0.00024187	NA	NA
236632_at	LOC646576	4.59729	2.36e-05	0.000175262	NA	NA
205214_at	STK17B	4.59367	0.00702642	0.0221016	NA	NA
204105_s_at	NRCAM	4.59207	2.55e-05	0.000187321	NA	NA
209164_s_at	CYB561	4.58932	5.64e-11	3.35e-09	NA	NA
243367_at	---	4.58872	1.02e-05	8.58e-05	NA	NA
231239_at	---	4.58636	9.16e-05	0.000558749	NA	NA
223721_s_at	DNAJC12	4.58632	1.42e-05	0.00011379	NA	NA
203889_at	SCG5	4.57748	0.0159093	0.0432112	NA	NA
239942_at	---	4.57679	3.97e-05	0.000273755	NA	NA
226697_at	FAM114A1	4.57425	4.81e-05	0.000321945	NA	NA
204204_at	SLC31A2	4.5627	5.24e-08	9.73e-07	Neural	NA
210253_at	HTATIP2	4.56013	0.00762913	0.023645	NA	NA
202627_s_at	SERPINE1	4.55956	6.36e-06	5.71e-05	Mesenchymal	Mesenchymal
212660_at	PHF15	4.55943	2.61e-11	1.79e-09	NA	NA
216841_s_at	SOD2	4.55086	1.77e-06	1.93e-05	NA	NA
229759_s_at	VEPH1	4.55002	0.0124455	0.0353045	NA	NA
204846_at	CP	4.54955	0.00579972	0.0188492	NA	NA
212268_at	SERPINB1	4.54743	5.31e-05	0.000351133	NA	NA
205730_s_at	ABLIM3	4.5442	9.27e-07	1.11e-05	NA	NA
204971_at	CSTA	4.54393	1.71e-09	5.61e-08	Mesenchymal	NA
239787_at	KCTD4	4.54285	0.0073719	0.0229951	NA	NA
217875_s_at	PMEPA1	4.54014	0.00399141	0.013841	NA	NA
229823_at	---	4.53515	0.0107894	0.0313515	NA	NA
207076_s_at	ASS1	4.53225	0.0411175	0.0941691	NA	NA
206924_at	IL11	4.52994	0.00774125	0.0238977	NA	NA
221601_s_at	FAIM3	4.52768	3.6e-06	3.51e-05	NA	NA
203593_at	CD2AP	4.52655	3.99e-11	2.51e-09	Mesenchymal	NA
212992_at	AHNAK2	4.52214	0.000243347	0.00128675	NA	NA
205476_at	CCL20	4.51278	0.00046538	0.00224439	NA	NA
242321_at	---	4.51247	3.14e-07	4.42e-06	NA	NA
228302_x_at	CAMK2N1	4.51238	0.00100514	0.00432079	NA	NA
218854_at	DSE	4.51045	0.00402265	0.0139316	Mesenchymal	NA
210702_s_at	PTGIS	4.50613	0.00443416	0.0150946	NA	NA
231234_at	CTSC	4.5039	4.02e-08	7.77e-07	Mesenchymal	NA
1557359_at	LOC285758	4.4988	0.0103506	0.030289	NA	NA
223218_s_at	NFKBIZ	4.49247	0.0010634	0.00452954	NA	NA
209016_s_at	KRT7	4.48884	4.39e-05	0.000297851	NA	NA
202345_s_at	FABP5	4.48843	0.0860638	0.169912	NA	NA
228726_at	---	4.48812	5.12e-05	0.000339413	NA	NA
240397_x_at	---	4.4855	0.00531864	0.0175475	NA	NA
217999_s_at	PHLDA1	4.48334	3.26e-09	9.55e-08	NA	NA
210985_s_at	SP100	4.48268	1.77e-11	1.29e-09	Mesenchymal	NA
1568868_at	CYP27C1	4.48081	0.0320374	0.0768338	NA	NA
226636_at	PLD1	4.47102	2.35e-08	4.96e-07	NA	NA
229005_at	MCTP2	4.46893	0.0018278	0.00718803	NA	NA
236738_at	LOC401097	4.46115	8.28e-05	0.000512348	NA	NA
229638_at	IRX3	4.45115	0.000214762	0.00115742	NA	NA
213150_at	HOXA10	4.44862	0.000106079	0.000634076	NA	NA
204638_at	ACP5	4.44616	0.00409266	0.0141356	NA	NA
228577_x_at	ODF2L	4.4423	0.000261802	0.00137147	NA	NA
203435_s_at	MME	4.43809	0.0056118	0.01833	NA	NA
204671_s_at	ANKRD6	4.43757	1.21e-08	2.84e-07	NA	NA
225801_at	---	4.43219	0.00593193	0.0192103	NA	NA
241925_x_at	---	4.432	0.00975989	0.0288483	NA	NA
201328_at	ETS2	4.4314	0.0392874	0.0907878	NA	NA
225021_at	ZNF532	4.42933	0.0336533	0.0799303	NA	NA
239587_at	---	4.42875	1.57e-05	0.000124098	NA	NA
202679_at	NPC1	4.42479	2.65e-07	3.82e-06	NA	NA
201108_s_at	THBS1	4.40926	0.0104368	0.0304842	Mesenchymal	NA
201387_s_at	UCHL1	4.40823	1.38e-05	0.000110791	NA	NA
1556097_at	---	4.40741	0.00339629	0.0121185	NA	NA
236201_at	---	4.40476	0.000478624	0.00229934	NA	NA
211844_s_at	NRP2	4.39825	6.37e-10	2.47e-08	NA	NA
201393_s_at	IGF2R	4.39745	7.83e-09	1.97e-07	NA	NA
202827_s_at	MMP14	4.39494	9.38e-09	2.28e-07	NA	NA
214825_at	FAM155A	4.39492	0.0253538	0.0633787	NA	NA
224339_s_at	ANGPTL1	4.39069	1.66e-09	5.46e-08	NA	NA
200904_at	HLA-E	4.38956	0.000311638	0.00159241	NA	NA
227386_s_at	TMEM200B	4.38627	0.0171131	0.0459062	NA	NA
212067_s_at	C1R	4.3849	0.000270347	0.00140867	NA	NA
1565525_a_at	TCP11L2	4.37909	1.9e-06	2.05e-05	NA	NA
228952_at	ENPP1	4.37852	0.00030949	0.00158247	NA	NA
223695_s_at	ARSD	4.3778	4.64e-11	2.84e-09	NA	NA
204749_at	NAP1L3	4.37544	1.48e-05	0.000118099	NA	NA
202996_at	POLD4	4.35808	3.23e-10	1.42e-08	Mesenchymal	NA
235831_at	---	4.34965	6.44e-07	8.15e-06	NA	NA
216899_s_at	SKAP2	4.32552	3.2e-09	9.42e-08	NA	NA
205896_at	SLC22A4	4.32541	6.96e-07	8.71e-06	NA	NA
218935_at	EHD3	4.32242	6.49e-06	5.82e-05	NA	NA
202074_s_at	OPTN	4.32226	6e-16	4.31e-13	NA	NA
217998_at	LOC100289208 /// PHLDA1	4.32223	6.94e-10	2.65e-08	NA	NA
238592_at	PDLIM3	4.32025	3.86e-05	0.000267198	NA	NA
219825_at	CYP26B1	4.31946	0.0276495	0.0679402	NA	NA
204115_at	GNG11	4.31088	3.66e-05	0.000255223	NA	NA
222020_s_at	NTM	4.30531	0.0711592	0.146314	NA	NA
232752_at	---	4.30505	0.0187456	0.0495177	NA	NA
225867_at	VASN	4.28791	0.0059029	0.0191356	NA	NA
216180_s_at	SYNJ2	4.28492	8.04e-09	2.01e-07	NA	NA
1559584_a_at	C16orf54	4.27947	0.00545976	0.0179298	NA	NA
212930_at	ATP2B1	4.2778	1.38e-12	1.76e-10	NA	NA
220786_s_at	SLC38A4	4.27744	0.000125167	0.000730288	NA	NA
212580_at	ERAP1	4.27503	1.57e-07	2.43e-06	NA	NA
240165_at	---	4.27067	5.54e-10	2.21e-08	NA	NA
228752_at	BCORL1	4.25781	0.00161269	0.00646577	NA	NA
210261_at	KCNK2	4.25662	0.0141006	0.0391445	NA	NA
219937_at	TRHDE	4.25601	0.00786811	0.0242108	NA	NA
203425_s_at	IGFBP5	4.25544	6.08e-05	0.000393378	NA	NA
222870_s_at	B3GNT2	4.25052	2.53e-11	1.74e-09	NA	NA
225325_at	MFSD6	4.23944	0.000445356	0.0021627	NA	NA
209281_s_at	ATP2B1	4.23748	3.06e-14	8.45e-12	NA	NA
202973_x_at	FAM13A	4.22713	3.09e-05	0.000220812	NA	NA
221059_s_at	COTL1	4.22593	3.56e-08	7.01e-07	NA	NA
229893_at	FRMD3	4.22434	0.075489	0.153297	NA	NA
229521_at	FLJ36031	4.22113	0.00144186	0.00587502	NA	NA
203005_at	LTBR	4.2201	3.3e-05	0.000233605	NA	NA
229245_at	PLEKHA6	4.21849	3.01e-07	4.26e-06	NA	NA
227758_at	RERG	4.21011	0.000322777	0.00163983	NA	NA
229603_at	BBS12	4.2044	9.9e-11	5.39e-09	NA	NA
233947_s_at	LOC255480	4.20431	0.0110508	0.0319837	NA	NA
231397_at	PAP2D	4.20066	0.0723403	0.148251	NA	NA
205099_s_at	CCR1	4.19928	6.34e-05	0.000408403	NA	NA
220615_s_at	FAR2	4.19909	0.000141915	0.000813899	NA	NA
204614_at	SERPINB2	4.19591	0.00330746	0.011841	NA	NA
227853_at	---	4.19319	1.02e-14	3.71e-12	NA	NA
204663_at	ME3	4.18729	9.84e-10	3.54e-08	NA	NA
1556773_at	---	4.18645	1.99e-07	2.99e-06	NA	NA
214129_at	PDE4DIP	4.1856	1.21e-13	2.55e-11	NA	NA
1563899_at	LCTL	4.17857	1.2e-06	1.39e-05	NA	NA
218000_s_at	PHLDA1	4.17712	2.19e-06	2.31e-05	NA	NA
228607_at	OAS2	4.17345	1.18e-05	9.71e-05	NA	NA
214063_s_at	TF	4.17323	0.0265357	0.0657321	NA	NA
203508_at	TNFRSF1B	4.16864	0.000790797	0.00352206	Mesenchymal	NA
235740_at	---	4.16667	0.000370211	0.00184215	NA	NA
226810_at	OGFRL1	4.16634	0.000149619	0.000851152	NA	NA
225639_at	SKAP2	4.16516	1.66e-09	5.46e-08	NA	NA
204454_at	LDOC1	4.16255	0.000709555	0.00321203	NA	NA
205968_at	KCNS3	4.16216	0.00684688	0.0216114	NA	NA
212667_at	SPARC	4.16085	1.41e-08	3.21e-07	NA	NA
1562474_at	---	4.15724	1.14e-12	1.55e-10	NA	NA
206375_s_at	HSPB3	4.15122	2.62e-05	0.000191705	NA	NA
218706_s_at	GRAMD3	4.15091	0.00314021	0.0113492	NA	NA
213125_at	OLFML2B	4.14832	0.0581877	0.124742	NA	NA
1555852_at	---	4.14276	9.25e-08	1.56e-06	NA	NA
204268_at	S100A2	4.1418	2.02e-07	3.03e-06	NA	NA
223185_s_at	BHLHE41	4.13189	1.06e-08	2.53e-07	NA	NA
235377_at	C6orf142	4.13095	0.00598457	0.01935	NA	NA
227438_at	ALPK1	4.12658	7.6e-09	1.92e-07	NA	NA
204465_s_at	INA	4.12591	0.00762706	0.0236413	NA	NA
229947_at	PI15	4.12508	0.00158087	0.0063545	NA	NA
1556034_s_at	MTMR11	4.12087	1.22e-06	1.41e-05	NA	NA
201883_s_at	B4GALT1	4.11421	4.52e-08	8.55e-07	NA	NA
214586_at	GPR37	4.11237	0.0159984	0.0434012	NA	NA
224436_s_at	NIPSNAP3A	4.10534	4.29e-10	1.78e-08	NA	NA
1561180_at	---	4.10491	0.00162325	0.00650192	NA	NA
209212_s_at	KLF5	4.10379	1.51e-06	1.68e-05	NA	NA
211366_x_at	CASP1	4.10288	5.94e-06	5.39e-05	Mesenchymal	NA
230730_at	SGCD	4.10257	0.00209307	0.00804095	NA	NA
241365_at	---	4.10115	1.2e-05	9.8e-05	NA	NA
210538_s_at	BIRC3	4.10019	0.00306639	0.0111258	NA	NA
225524_at	ANTXR2	4.09214	0.0051233	0.0170211	NA	NA
209821_at	IL33	4.09143	0.00450069	0.0152785	NA	NA
207180_s_at	HTATIP2	4.08972	0.00127465	0.00528607	NA	NA
219256_s_at	SH3TC1	4.08897	0.0127077	0.0359149	NA	NA
229810_at	---	4.08895	1.44e-12	1.82e-10	NA	NA
219631_at	LRP12	4.08834	4.7e-13	7.47e-11	NA	NA
202071_at	SDC4	4.08354	0.0010309	0.00441246	NA	NA
1552502_s_at	RHBDL2	4.08154	5.61e-09	1.5e-07	NA	NA
1556629_a_at	SNAP25	4.08151	0.000362016	0.00180694	NA	NA
219932_at	SLC27A6	4.08037	0.00195381	0.0075886	NA	NA
208394_x_at	ESM1	4.07857	0.00365241	0.0128637	NA	NA
52651_at	COL8A2	4.07762	0.00876455	0.0264562	Mesenchymal	NA
204361_s_at	SKAP2	4.07562	1.28e-09	4.44e-08	NA	NA
214927_at	ITGBL1	4.07104	0.00974338	0.028819	NA	NA
229942_at	BNC2	4.07071	0.0156168	0.0425712	Mesenchymal	NA
239893_at	---	4.06976	0.00379843	0.0132813	NA	NA
200872_at	S100A10	4.06699	3.21e-13	5.48e-11	NA	NA
237435_at	---	4.06656	1.36e-06	1.54e-05	NA	NA
238025_at	MLKL	4.0594	8.94e-07	1.08e-05	NA	NA
204362_at	SKAP2	4.05561	1.54e-09	5.13e-08	NA	NA
201012_at	ANXA1	4.05417	6.66e-07	8.4e-06	Mesenchymal	NA
219687_at	HHAT	4.0526	6.97e-12	6.29e-10	NA	NA
203797_at	VSNL1	4.05179	0.0328467	0.0783891	NA	NA
243606_at	FAM55C	4.05069	3.77e-11	2.39e-09	NA	NA
214030_at	CRYBG3	4.04781	1.18e-15	7.76e-13	NA	NA
208981_at	PECAM1	4.04751	9.78e-07	1.16e-05	NA	NA
210770_s_at	CACNA1A	4.04716	0.000634506	0.00292165	NA	NA
204255_s_at	VDR	4.04672	0.0103366	0.0302545	Mesenchymal	NA
229991_s_at	SYTL4	4.04509	4.89e-05	0.00032646	NA	NA
235830_at	---	4.03876	2.35e-06	2.45e-05	NA	NA
206243_at	TIMP4	4.03834	0.000128693	0.000748222	NA	NA
209514_s_at	RAB27A	4.03797	1.16e-12	1.55e-10	Mesenchymal	NA
241560_at	---	4.03664	0.000325044	0.00164874	NA	NA
202728_s_at	LTBP1	4.0345	0.0555314	0.120207	Mesenchymal	NA
204298_s_at	LOX	4.03354	0.0516568	0.113345	Mesenchymal	NA
217504_at	ABCA6	4.03336	3.95e-06	3.8e-05	NA	NA
229160_at	MUM1L1	4.02917	0.0327723	0.0782525	NA	NA
204629_at	PARVB	4.02812	2.94e-11	1.94e-09	NA	NA
224871_at	TPRG1L	4.02696	2.36e-11	1.63e-09	NA	NA
1558508_a_at	C1orf53	4.02662	4.98e-07	6.54e-06	NA	NA
206448_at	ZNF365	4.02262	2.44e-05	0.000180145	NA	NA
226103_at	NEXN	4.02241	0.0191341	0.0503736	NA	NA
222895_s_at	BCL11B	4.02191	0.0222063	0.0569213	NA	NA
230121_at	C1orf133	4.02017	2.7e-05	0.000196288	NA	NA
201809_s_at	ENG	4.0196	0.000118386	0.000695472	Mesenchymal	NA
210176_at	TLR1	4.01444	0.00130275	0.00538258	NA	NA
206191_at	ENTPD3	4.01348	0.00251833	0.00941083	NA	NA
238178_at	---	4.01293	0.00152752	0.00617046	NA	NA
203912_s_at	DNASE1L1	4.01261	2.03e-08	4.38e-07	NA	NA
227618_at	---	4.01134	0.0110673	0.032023	NA	NA
213603_s_at	RAC2	4.01081	0.0103385	0.0302585	Mesenchymal	NA
200742_s_at	TPP1	4.01044	3.29e-15	1.54e-12	NA	NA
235548_at	APCDD1L	3.99989	0.00758317	0.0235186	NA	NA
204679_at	KCNK1	3.99155	0.00877793	0.0264878	Neural	NA
202422_s_at	ACSL4	3.98416	3.65e-09	1.05e-07	Neural	NA
201029_s_at	CD99	3.98284	1.63e-16	1.64e-13	NA	NA
232270_at	C9orf3	3.97894	0.00167054	0.00666141	NA	NA
213994_s_at	SPON1	3.97756	0.0129765	0.0365696	NA	NA
204082_at	PBX3	3.9732	1.13e-11	9.09e-10	NA	NA
236675_at	RPA1	3.97105	0.00376076	0.0131748	NA	NA
212089_at	LMNA	3.97063	1.38e-05	0.000111345	NA	NA
232368_at	BET3L	3.96983	0.00798359	0.024502	NA	NA
212158_at	SDC2	3.96922	0.00705278	0.0221641	NA	NA
215767_at	ZNF804A	3.96835	0.034246	0.0810702	Proneural	NA
201301_s_at	ANXA4	3.96548	3.35e-06	3.3e-05	Mesenchymal	NA
1555745_a_at	LYZ	3.9646	0.0255466	0.0637528	NA	NA
240292_x_at	ANKS1B	3.96455	0.00134561	0.00552916	Neural	NA
225280_x_at	ARSD	3.96138	2.81e-12	3.07e-10	NA	NA
202295_s_at	CTSH	3.95548	3.4e-06	3.35e-05	NA	NA
242888_at	---	3.94735	1.19e-07	1.93e-06	NA	NA
235940_at	C9orf64	3.94652	0.000355306	0.00177881	NA	NA
223603_at	RNF112	3.94405	0.00204035	0.00786604	NA	NA
1553614_a_at	FLJ25694	3.94384	0.00261413	0.00970712	NA	NA
202342_s_at	TRIM2	3.94019	9.52e-12	7.92e-10	NA	NA
1563445_x_at	CTSLL3	3.93984	3.3e-10	1.44e-08	NA	NA
211809_x_at	COL13A1	3.93883	2.2e-06	2.32e-05	NA	NA
212154_at	SDC2	3.93879	0.00596062	0.0192918	NA	NA
239183_at	ANGPTL1	3.93509	1.29e-10	6.69e-09	NA	NA
223586_at	ARNTL2	3.93481	0.000206246	0.00112004	NA	NA
234986_at	---	3.93477	1.73e-11	1.27e-09	NA	NA
242600_at	FRMD3	3.93457	0.0928353	0.180408	NA	NA
1558378_a_at	AHNAK2	3.93043	0.000660505	0.00302404	NA	NA
213537_at	HLA-DPA1	3.92997	2.09e-06	2.21e-05	NA	NA
218204_s_at	FYCO1	3.92726	2.69e-08	5.57e-07	NA	NA
203501_at	PGCP	3.91673	0.00253669	0.00946647	Mesenchymal	NA
219230_at	TMEM100	3.91652	0.0204339	0.0531759	NA	NA
226301_at	C6orf192	3.91629	7.12e-05	0.000450578	NA	NA
215617_at	SPATS2L	3.91592	2.9e-05	0.00020893	NA	NA
203570_at	LOXL1	3.91203	0.173405	0.293372	NA	NA
220658_s_at	ARNTL2	3.90922	0.000270838	0.00141083	NA	NA
228303_at	GALNT6	3.90859	0.0460367	0.103281	NA	NA
206177_s_at	ARG1	3.90738	3.98e-06	3.83e-05	NA	NA
202087_s_at	CTSL1	3.90707	1.75e-12	2.11e-10	NA	NA
223204_at	C4orf18	3.90393	0.0876719	0.1724	NA	NA
1553142_at	C13orf31	3.90251	0.00227746	0.00864604	NA	NA
239010_at	FLJ39632	3.89991	3.72e-06	3.62e-05	NA	NA
229307_at	ANKRD28	3.8983	0.000162071	0.000909216	NA	NA
203414_at	MMD	3.89424	0.0029595	0.0107917	Neural	NA
235033_at	NPEPL1	3.89351	2.95e-08	6.03e-07	Classical	NA
224505_s_at	PLCD4	3.89311	3.9e-09	1.11e-07	NA	NA
210224_at	MR1	3.89092	4.82e-07	6.37e-06	NA	NA
211742_s_at	EVI2B	3.8898	0.00483439	0.016211	NA	NA
238478_at	BNC2	3.88834	0.0284036	0.0694654	Mesenchymal	NA
1558511_s_at	ESYT2	3.88741	1.1e-09	3.86e-08	NA	NA
202341_s_at	TRIM2	3.88352	8.09e-12	7.11e-10	NA	NA
232204_at	EBF1	3.88269	0.00572445	0.0186543	NA	NA
37892_at	COL11A1	3.88136	0.0785125	0.158075	NA	NA
236503_at	---	3.8813	1.91e-07	2.89e-06	NA	NA
204439_at	IFI44L	3.88096	0.0227258	0.0579432	NA	NA
223484_at	C15orf48	3.87919	0.0185775	0.0491567	NA	NA
203736_s_at	PPFIBP1	3.87622	1.59e-06	1.76e-05	NA	NA
225265_at	RBMS1	3.87043	1.62e-05	0.000127776	Mesenchymal	NA
206060_s_at	PTPN22	3.8681	0.00935213	0.0278805	Mesenchymal	NA
212586_at	CAST	3.86592	3.19e-06	3.17e-05	Mesenchymal	NA
223019_at	FAM129B	3.86574	2.02e-07	3.03e-06	NA	NA
213698_at	ZMYM6	3.86455	4.2e-20	3.16e-16	NA	NA
220794_at	GREM2	3.86196	0.00166351	0.00663837	NA	NA
212190_at	SERPINE2	3.86068	0.00123539	0.0051502	NA	NA
207067_s_at	HDC	3.85485	0.00101547	0.00435767	NA	NA
228438_at	LOC100132891	3.85275	0.000211298	0.00114247	NA	NA
201427_s_at	SEPP1	3.85114	0.0504604	0.111177	Neural	NA
57715_at	CALHM2	3.84908	1.96e-05	0.000149374	NA	NA
228754_at	SLC6A6	3.84649	9.37e-13	1.34e-10	NA	NA
1558944_at	CACNA1A	3.84648	0.00799714	0.0245339	NA	NA
230345_at	SEMA7A	3.84571	2.38e-11	1.64e-09	NA	NA
204070_at	RARRES3	3.84095	8.4e-07	1.02e-05	NA	NA
209994_s_at	ABCB1 /// ABCB4	3.83904	5.38e-05	0.000354747	NA	NA
212805_at	PRUNE2	3.83728	4.7e-05	0.000315798	NA	NA
214453_s_at	IFI44	3.83447	9.93e-05	0.000599248	NA	NA
243362_s_at	LOC641518	3.83155	0.000325266	0.00164971	NA	NA
204627_s_at	ITGB3	3.82946	2.45e-05	0.000181245	NA	NA
220266_s_at	KLF4	3.82542	7.46e-08	1.3e-06	NA	NA
214068_at	BEAN	3.82488	3.43e-07	4.77e-06	NA	NA
201060_x_at	STOM	3.82124	2.11e-08	4.51e-07	NA	NA
231929_at	IKZF2	3.82035	1.24e-07	1.99e-06	NA	NA
215081_at	KIAA1024	3.81586	9.5e-05	0.000576511	NA	NA
233388_at	---	3.81454	4.92e-12	4.75e-10	NA	NA
207959_s_at	DNAH9	3.81343	0.0248232	0.0623037	NA	NA
236697_at	---	3.80796	0.00659145	0.0209601	NA	NA
242133_s_at	---	3.80455	6.96e-10	2.65e-08	NA	NA
203303_at	DYNLT3	3.80202	1.39e-13	2.85e-11	NA	NA
202637_s_at	ICAM1	3.80026	7.01e-05	0.000444378	NA	NA
224506_s_at	PPAPDC3	3.79949	3.83e-11	2.42e-09	NA	NA
213222_at	PLCB1	3.79924	1.94e-05	0.000148203	NA	NA
209632_at	PPP2R3A	3.79902	0.00105785	0.00450977	NA	NA
203279_at	EDEM1	3.79442	1.99e-13	3.74e-11	NA	NA
207074_s_at	SLC18A1	3.79395	0.0317468	0.0762635	NA	NA
1556641_at	SLC7A14	3.79267	0.00794674	0.0244067	NA	NA
217312_s_at	COL7A1	3.79102	0.000307357	0.00157377	NA	NA
219874_at	SLC12A8	3.78951	0.00143079	0.00583488	NA	NA
209270_at	LAMB3	3.78945	0.000617982	0.00285566	NA	NA
1556047_s_at	MAGEE1	3.78699	0.00122864	0.00512637	NA	NA
238934_at	---	3.78646	2.54e-07	3.69e-06	NA	NA
201954_at	ARPC1B	3.78524	2.46e-07	3.59e-06	Mesenchymal	NA
201288_at	ARHGDIB	3.78478	1.43e-09	4.85e-08	NA	NA
217047_s_at	FAM13A	3.78367	2.06e-05	0.000156128	NA	NA
229363_at	---	3.78103	0.00144658	0.00589018	NA	NA
211924_s_at	PLAUR	3.78042	0.0666264	0.138757	Mesenchymal	NA
160020_at	MMP14	3.77594	3.1e-09	9.18e-08	NA	NA
213675_at	---	3.77584	3.02e-05	0.000216141	NA	NA
201810_s_at	SH3BP5	3.77507	2.57e-05	0.000188174	NA	NA
215228_at	NHLH2	3.77453	0.002383	0.00898554	NA	NA
210140_at	CST7	3.77398	0.00133145	0.00548047	NA	NA
224973_at	FAM46A	3.76817	1.49e-11	1.13e-09	NA	NA
203274_at	F8A1 /// F8A2 /// F8A3	3.76632	2.8e-15	1.38e-12	NA	NA
227752_at	SPTLC3	3.76551	0.000151005	0.000857785	NA	NA
226282_at	---	3.76266	1.14e-06	1.32e-05	NA	NA
226850_at	SUMF1	3.76218	2.97e-09	8.87e-08	NA	NA
219688_at	BBS7	3.76209	7.91e-05	0.000492977	NA	NA
228708_at	RAB27B	3.75686	0.154261	0.267905	NA	NA
230744_at	---	3.75387	0.00202527	0.00781508	NA	NA
222701_s_at	CHCHD7	3.75382	8.75e-07	1.06e-05	NA	NA
212632_at	STX7	3.75356	1.93e-09	6.19e-08	NA	NA
220144_s_at	ANKRD5	3.75197	1.03e-05	8.62e-05	NA	NA
238598_s_at	---	3.74876	6.85e-09	1.77e-07	NA	NA
1552736_a_at	NETO1	3.74667	0.0206333	0.0536079	NA	NA
232449_at	BCO2	3.7464	0.000188113	0.00103482	NA	NA
235182_at	ISM1	3.7439	0.0214122	0.0552302	NA	NA
228274_at	SDSL	3.74217	1.68e-05	0.000131328	NA	NA
225688_s_at	PHLDB2	3.74184	0.0432533	0.0981274	NA	NA
203542_s_at	KLF9	3.74008	7.02e-08	1.24e-06	NA	NA
227909_at	NCRNA00086 /// NCRNA00087	3.73792	3.38e-06	3.33e-05	NA	NA
206693_at	IL7	3.7378	0.0323324	0.077388	NA	NA
204964_s_at	SSPN	3.73605	7.99e-07	9.77e-06	NA	NA
230930_at	LOC338620	3.73457	2.58e-06	2.64e-05	NA	NA
1554544_a_at	MBP	3.7323	0.00623477	0.0200285	Neural	NA
204143_s_at	ENOSF1	3.73154	0.00188242	0.00736309	NA	NA
224916_at	TMEM173	3.73115	3.08e-12	3.31e-10	NA	NA
203030_s_at	PTPRN2	3.72722	0.00118729	0.00497661	NA	NA
221060_s_at	TLR4	3.72259	2.32e-06	2.42e-05	Mesenchymal	NA
205259_at	NR3C2	3.72212	0.00127245	0.00527936	NA	NA
210170_at	PDLIM3	3.71596	0.0001751	0.000973123	NA	NA
213295_at	CYLD	3.71196	1.18e-07	1.92e-06	NA	NA
204083_s_at	TPM2	3.71121	0.0878883	0.172717	NA	NA
220617_s_at	ZNF532	3.709	0.0252977	0.0632616	NA	NA
202073_at	OPTN	3.70814	3.38e-07	4.71e-06	NA	NA
225093_at	UTRN	3.7046	9.96e-07	1.18e-05	NA	NA
203951_at	CNN1	3.7028	0.00308677	0.0111871	NA	NA
1554918_a_at	ABCC4	3.70276	2.86e-10	1.29e-08	NA	NA
213816_s_at	MET	3.7022	0.00407661	0.0140899	NA	NA
205287_s_at	TFAP2C	3.69712	0.00228361	0.00866637	NA	NA
223028_s_at	SNX9	3.69591	1.61e-05	0.000126724	NA	NA
201811_x_at	SH3BP5	3.6958	2.68e-05	0.000195465	NA	NA
205726_at	DIAPH2	3.69447	0.0186141	0.0492415	NA	NA
201061_s_at	STOM	3.69273	4.87e-10	1.98e-08	NA	NA
219326_s_at	B3GNT2	3.68785	4.48e-10	1.85e-08	NA	NA
219505_at	CECR1	3.68754	5.6e-08	1.03e-06	NA	NA
221790_s_at	LDLRAP1	3.68742	5.49e-06	5.03e-05	NA	NA
209227_at	TUSC3	3.68703	0.0355524	0.0835935	NA	NA
217730_at	TMBIM1	3.6868	1.48e-09	4.98e-08	Mesenchymal	NA
222872_x_at	OBFC2A	3.68657	5.39e-05	0.000355539	NA	NA
221584_s_at	KCNMA1	3.68398	0.000499	0.00238132	NA	NA
241418_at	---	3.68231	3.47e-05	0.000243707	NA	NA
1556704_s_at	LOC100133920 /// LOC286297	3.68191	0.00436533	0.014897	NA	NA
207850_at	CXCL3	3.67779	0.00183903	0.00722544	NA	NA
217997_at	PHLDA1	3.67299	4.01e-08	7.74e-07	NA	NA
238430_x_at	SLFN5	3.67282	0.0191512	0.0504089	NA	NA
219528_s_at	BCL11B	3.67024	0.0204264	0.053164	NA	NA
203925_at	GCLM	3.66946	1.66e-15	9.54e-13	NA	NA
201286_at	SDC1	3.66716	0.000711067	0.00321728	NA	NA
244533_at	---	3.666	1.12e-06	1.31e-05	NA	NA
232083_at	KIF16B	3.66507	5.37e-06	4.94e-05	NA	NA
1554600_s_at	LMNA	3.66478	1.39e-08	3.18e-07	NA	NA
1556328_at	---	3.6631	0.0167207	0.0450191	NA	NA
205080_at	RARB	3.66237	0.00104721	0.0044714	NA	NA
230887_at	CDC14B	3.66103	7.33e-11	4.2e-09	NA	NA
230722_at	BNC2	3.65953	0.0394811	0.0911468	Mesenchymal	NA
211330_s_at	HFE	3.6591	3.97e-10	1.67e-08	Mesenchymal	NA
240777_at	SYNE2	3.65698	0.00663071	0.0210562	NA	NA
204058_at	ME1	3.65549	0.174521	0.294904	NA	NA
221905_at	CYLD	3.65526	7.32e-08	1.28e-06	NA	NA
231329_at	---	3.65458	2.11e-06	2.24e-05	NA	NA
239579_at	EPHX4	3.65347	3.24e-05	0.000229926	NA	NA
212299_at	NEK9	3.65297	8.79e-06	7.52e-05	NA	NA
228624_at	TMEM144	3.65191	2.37e-09	7.32e-08	Neural	NA
226462_at	STXBP6	3.64585	0.0256254	0.0639174	NA	NA
240259_at	FLRT2	3.64325	2.06e-05	0.000156302	NA	NA
230773_at	---	3.64156	8.53e-11	4.74e-09	NA	NA
217996_at	PHLDA1	3.64127	2.16e-09	6.78e-08	NA	NA
204684_at	NPTX1	3.64012	0.00223892	0.00852044	NA	NA
201137_s_at	HLA-DPB1	3.64	7.12e-09	1.82e-07	NA	NA
210037_s_at	NOS2	3.63859	0.000492073	0.00235299	Classical	NA
205921_s_at	SLC6A6	3.63584	8.64e-10	3.19e-08	NA	NA
239834_at	---	3.63526	8.46e-06	7.29e-05	NA	NA
201319_at	MYL12A	3.63335	1.5e-10	7.58e-09	NA	NA
209633_at	PPP2R3A	3.63319	0.000844374	0.00372329	NA	NA
242093_at	SYTL5	3.63287	5.51e-08	1.01e-06	NA	NA
235349_at	FAM82A1	3.6328	6.34e-07	8.04e-06	NA	NA
203411_s_at	LMNA	3.63129	3.52e-09	1.02e-07	NA	NA
222134_at	DDO	3.63008	0.000249625	0.00131513	NA	NA
207992_s_at	AMPD3	3.62997	0.00586674	0.0190421	Mesenchymal	NA
218885_s_at	GALNT12	3.62993	0.00398162	0.013814	NA	NA
229974_at	EVC2	3.62908	0.00144477	0.00588487	NA	NA
225286_at	ARSD	3.62696	6.3e-10	2.45e-08	NA	NA
229492_at	VANGL1	3.62586	1.51e-07	2.35e-06	NA	NA
214632_at	NRP2	3.6248	2.22e-08	4.71e-07	NA	NA
1553228_at	CCDC89	3.62232	0.000300065	0.00154221	NA	NA
1554285_at	HAVCR2	3.61986	0.00721436	0.0225901	NA	NA
233950_at	CADPS	3.61872	0.0183812	0.0487208	NA	NA
1567224_at	HMGA2	3.61848	0.049804	0.110021	NA	NA
244334_at	TRAM1L1	3.61747	2.31e-07	3.4e-06	NA	NA
205114_s_at	CCL3 /// CCL3L1 /// CCL3L3	3.61042	0.0090662	0.0271921	NA	NA
209277_at	TFPI2	3.60733	0.148709	0.26034	NA	NA
210946_at	PPAP2A	3.60725	2.05e-10	9.75e-09	NA	NA
219367_s_at	---	3.60245	0.000158306	0.000892091	NA	NA
214791_at	SP140L	3.60241	3.84e-08	7.49e-07	NA	NA
210785_s_at	C1orf38	3.60028	0.000298546	0.00153556	Mesenchymal	NA
236539_at	PTPN22	3.59766	0.00710923	0.022312	Mesenchymal	NA
216546_s_at	CHI3L1	3.59749	0.00433776	0.0148165	Mesenchymal	Mesenchymal
213817_at	IRAK3	3.59317	0.00664761	0.0211031	NA	NA
225080_at	MYO1C	3.59295	2.86e-10	1.29e-08	NA	NA
1555830_s_at	ESYT2	3.59267	9.11e-09	2.23e-07	NA	NA
223217_s_at	NFKBIZ	3.59209	0.0029853	0.0108705	NA	NA
229951_x_at	---	3.58514	3.23e-06	3.21e-05	NA	NA
203706_s_at	FZD7	3.58122	2.35e-05	0.00017456	Classical	NA
235020_at	TAF4B	3.57903	2.12e-09	6.69e-08	NA	NA
214036_at	EFNA5	3.57691	0.00299901	0.010914	NA	NA
241456_at	FAM78B	3.57553	0.00275127	0.0101385	NA	NA
224699_s_at	ESYT2	3.57302	6.44e-10	2.48e-08	NA	NA
210663_s_at	KYNU	3.57258	0.0150725	0.0413182	Mesenchymal	NA
235521_at	HOXA3	3.572	0.0171014	0.0458846	NA	NA
203705_s_at	FZD7	3.5719	1.7e-05	0.000132669	Classical	NA
212806_at	PRUNE2	3.57122	3.66e-07	5.03e-06	NA	NA
204760_s_at	NR1D1 /// THRA	3.57048	3.1e-06	3.09e-05	NA	NA
214647_s_at	HFE	3.56469	4.9e-10	1.99e-08	Mesenchymal	NA
229288_at	EPHA7	3.56403	0.00493574	0.0165012	NA	NA
204527_at	MYO5A	3.56095	8.01e-14	1.85e-11	NA	NA
210117_at	SPAG1	3.5581	8.64e-06	7.42e-05	NA	NA
206331_at	CALCRL	3.55681	0.000431497	0.00210275	NA	NA
208016_s_at	AGTR1	3.55595	0.00865797	0.0261909	NA	NA
219015_s_at	ALG13	3.55099	2.92e-12	3.17e-10	NA	NA
208296_x_at	TNFAIP8	3.55047	0.00061894	0.0028596	Mesenchymal	NA
225946_at	RASSF8	3.54912	4.09e-07	5.53e-06	NA	NA
236335_at	---	3.54906	0.0982381	0.188694	NA	NA
210845_s_at	PLAUR	3.54865	0.0763875	0.154679	Mesenchymal	NA
204420_at	FOSL1	3.54789	0.00385397	0.0134385	NA	NA
1561521_at	S100B	3.54729	0.00810411	0.024805	NA	NA
241762_at	FBXO32	3.54716	0.013486	0.037759	NA	NA
207981_s_at	ESRRG	3.54521	6.77e-05	0.000431275	NA	NA
210260_s_at	TNFAIP8	3.54442	0.00152044	0.00614685	Mesenchymal	NA
1554690_a_at	TACC1	3.54388	2.23e-08	4.73e-07	NA	NA
228653_at	SAMD5	3.54074	0.00397598	0.0137971	NA	NA
228573_at	ANTXR2	3.54011	0.0106887	0.0310935	NA	NA
227020_at	YPEL2	3.53963	0.000181623	0.00100336	NA	NA
225033_at	ST3GAL1	3.53918	0.000110482	0.000654947	NA	NA
209420_s_at	SMPD1	3.53794	2.74e-10	1.24e-08	NA	NA
228116_at	---	3.53792	2.24e-09	6.99e-08	NA	NA
207686_s_at	CASP8	3.53696	6.95e-09	1.79e-07	Mesenchymal	NA
201432_at	CAT	3.53687	3.2e-09	9.42e-08	NA	NA
230926_s_at	ODF2L	3.5331	9.91e-06	8.33e-05	NA	NA
218530_at	FHOD1	3.53257	0.000112344	0.000664474	Mesenchymal	NA
213325_at	PVRL3	3.53168	4.18e-06	3.98e-05	NA	NA
210151_s_at	DYRK3	3.53008	1.68e-10	8.29e-09	NA	NA
209739_s_at	PNPLA4	3.52792	4.02e-05	0.000276747	NA	NA
220050_at	C9orf9	3.52753	3.59e-10	1.54e-08	NA	NA
203329_at	PTPRM	3.52517	0.000186299	0.00102629	NA	NA
230645_at	FRMD3	3.52475	0.169431	0.288237	NA	NA
235754_at	HFE	3.52281	7.52e-12	6.67e-10	Mesenchymal	NA
205257_s_at	AMPH	3.52257	0.0450005	0.101364	NA	NA
204675_at	SRD5A1	3.51718	0.00944032	0.0280974	NA	NA
208782_at	FSTL1	3.5154	9.7e-05	0.00058692	NA	NA
228188_at	FOSL2	3.5102	0.00128511	0.00532178	NA	Mesenchymal
204880_at	MGMT	3.50908	0.00151797	0.00614006	NA	NA
65718_at	GPR124	3.5088	0.00367698	0.012931	NA	NA
206837_at	ALX1	3.50861	0.0108432	0.0314893	NA	NA
210219_at	SP100	3.50635	3.34e-10	1.45e-08	Mesenchymal	NA
232317_at	PLXNA4	3.5052	1.95e-08	4.23e-07	NA	NA
213438_at	NFASC	3.50462	0.0272933	0.067216	NA	NA
201392_s_at	IGF2R	3.5023	7.54e-08	1.31e-06	NA	NA
203567_s_at	TRIM38	3.49935	0.000695944	0.00316036	Mesenchymal	NA
223699_at	CNDP1	3.49739	0.00788062	0.0242409	NA	NA
236076_at	LOC257396	3.49661	1.37e-06	1.55e-05	NA	NA
221872_at	RARRES1	3.49605	1.68e-05	0.000131324	NA	NA
1553055_a_at	SLFN5	3.49268	0.00538676	0.017739	NA	NA
212530_at	NEK7	3.49202	3.72e-12	3.78e-10	NA	NA
213488_at	SNED1	3.48958	0.0218527	0.0562023	NA	NA
209417_s_at	IFI35	3.48828	2.02e-10	9.65e-09	NA	NA
1569253_at	INTS4	3.4866	1.73e-10	8.5e-09	NA	NA
220462_at	CSRNP3	3.4825	0.00219239	0.00836722	NA	NA
208908_s_at	CAST	3.48044	1.75e-06	1.91e-05	Mesenchymal	NA
209147_s_at	PPAP2A	3.47799	7.28e-10	2.75e-08	NA	NA
201041_s_at	DUSP1	3.47376	2.14e-07	3.19e-06	NA	NA
200916_at	TAGLN2	3.47344	4.77e-11	2.91e-09	NA	NA
212150_at	EFR3A	3.47246	1.76e-15	9.85e-13	NA	NA
203233_at	IL4R	3.46995	0.0215925	0.0556373	Mesenchymal	NA
217437_s_at	TACC1	3.46937	1.87e-08	4.09e-07	NA	NA
209406_at	BAG2	3.46898	1.56e-06	1.73e-05	NA	NA
217371_s_at	IL15	3.46798	0.00233422	0.00882964	NA	NA
212135_s_at	ATP2B4	3.46599	1.73e-17	3.26e-14	NA	NA
241331_at	SKAP2	3.4659	0.0213008	0.0549985	NA	NA
228732_at	---	3.46522	0.0201179	0.0525184	NA	NA
207467_x_at	CAST	3.46516	7.79e-07	9.58e-06	Mesenchymal	NA
203568_s_at	TRIM38	3.46436	0.00201237	0.00777243	Mesenchymal	NA
235550_at	MAP9	3.46178	2.64e-12	2.92e-10	NA	NA
238440_at	CLYBL	3.45989	3.32e-07	4.64e-06	NA	NA
232636_at	SLITRK4	3.45904	0.0110753	0.0320427	NA	NA
204672_s_at	ANKRD6	3.45728	4.42e-08	8.41e-07	NA	NA
38671_at	PLXND1	3.45321	4.99e-12	4.79e-10	NA	NA
207345_at	FST	3.45021	0.0144458	0.0398861	NA	NA
223402_at	DUSP23	3.44755	9.01e-10	3.29e-08	NA	NA
202995_s_at	FBLN1	3.44615	0.123075	0.224807	NA	NA
1559923_at	---	3.44569	0.00610391	0.0196845	NA	NA
214343_s_at	ATXN7L1	3.44062	1.81e-05	0.000139614	NA	NA
229865_at	FNDC3B	3.44053	5.03e-09	1.37e-07	Mesenchymal	NA
231996_at	N4BP2	3.43929	4.34e-09	1.22e-07	NA	NA
219922_s_at	LTBP3	3.43882	1.2e-07	1.94e-06	NA	NA
229354_at	AHRR	3.43557	0.0571052	0.122922	NA	NA
243492_at	THEM4	3.43534	0.000287634	0.00148629	NA	NA
1564807_at	---	3.43488	1.36e-06	1.54e-05	NA	NA
230803_s_at	ARHGAP24	3.43285	0.000838287	0.00370012	NA	NA
210896_s_at	ASPH	3.43237	3.06e-07	4.32e-06	NA	NA
213189_at	MINA	3.43143	1.01e-16	1.18e-13	NA	NA
236918_s_at	LRRC34	3.43058	1.12e-10	5.91e-09	NA	NA
229057_at	SCN2A	3.42917	6.62e-05	0.000423287	NA	NA
210021_s_at	CCNO	3.42792	2.75e-05	0.000200018	NA	NA
228739_at	CYS1	3.425	0.000519277	0.00246432	NA	NA
227186_s_at	MRPL41	3.41981	0.00343864	0.0122455	NA	NA
228832_at	FLJ20021	3.41817	6.42e-05	0.000412297	NA	NA
1557236_at	APOL6	3.41499	5.7e-06	5.2e-05	NA	NA
212136_at	ATP2B4	3.41425	3.9e-17	5.75e-14	NA	NA
221565_s_at	CALHM2	3.41366	9.13e-05	0.000557258	NA	NA
203196_at	ABCC4	3.40941	1.31e-05	0.000106063	NA	NA
201862_s_at	LRRFIP1	3.40598	3.37e-08	6.72e-07	Mesenchymal	NA
1560208_at	---	3.40436	0.01875	0.0495268	NA	NA
1555997_s_at	IGFBP5	3.40374	0.00248584	0.00931103	NA	NA
231040_at	---	3.40235	0.0111817	0.0322907	NA	NA
205922_at	VNN2	3.40189	0.00365601	0.0128755	NA	NA
205100_at	GFPT2	3.39929	0.00788545	0.0242539	NA	NA
203879_at	PIK3CD	3.39877	0.0282318	0.0691224	NA	NA
234978_at	SLC36A4	3.39662	4.74e-10	1.94e-08	NA	NA
225442_at	DDR2	3.39576	0.00106033	0.00451825	NA	NA
213909_at	LRRC15	3.3944	0.00876048	0.0264469	NA	NA
236140_at	GCLM	3.39332	1.92e-11	1.39e-09	NA	NA
206200_s_at	ANXA11	3.39331	4.32e-05	0.000293928	NA	NA
213317_at	CLIC5	3.38758	0.0258111	0.0642721	NA	NA
203143_s_at	KIAA0040	3.38314	0.00146442	0.00595562	NA	NA
233518_at	---	3.38244	2.16e-07	3.21e-06	NA	NA
215717_s_at	FBN2	3.38109	3.87e-06	3.74e-05	NA	NA
210467_x_at	MAGEA12	3.37646	0.00222337	0.00846774	NA	NA
224566_at	NEAT1	3.37457	1.01e-05	8.49e-05	NA	NA
236154_at	QKI	3.37438	1.65e-08	3.68e-07	NA	NA
209621_s_at	PDLIM3	3.36968	1.09e-05	9.06e-05	NA	NA
223000_s_at	F11R	3.36887	0.00354715	0.0125573	NA	NA
230076_at	PITPNM3	3.36728	0.00395838	0.0137482	NA	NA
204320_at	COL11A1	3.3655	0.0837666	0.166313	NA	NA
205632_s_at	PIP5K1B	3.36368	0.0343768	0.0813024	NA	NA
225977_at	PCDH18	3.36112	0.000548878	0.0025835	NA	NA
1553622_a_at	FSIP1	3.36071	3.94e-08	7.63e-07	NA	NA
202752_x_at	SLC7A8	3.36065	5.56e-07	7.2e-06	NA	NA
227458_at	---	3.35714	5.9e-07	7.57e-06	NA	NA
226939_at	CPEB2	3.35712	4.49e-05	0.000303741	NA	NA
235902_at	---	3.35565	0.000795409	0.00353901	NA	NA
206525_at	GABRR1	3.35342	0.0087653	0.026457	NA	NA
212875_s_at	C2CD2	3.35273	2.11e-06	2.23e-05	NA	NA
212687_at	LIMS1	3.34882	1.11e-09	3.91e-08	NA	NA
221766_s_at	FAM46A	3.34798	5.59e-12	5.28e-10	NA	NA
206392_s_at	RARRES1	3.34767	3.01e-05	0.000215809	NA	NA
201471_s_at	SQSTM1	3.34372	1.65e-06	1.81e-05	NA	NA
1555862_s_at	MICALL2	3.33926	0.000131	0.0007597	NA	NA
222899_at	ITGA11	3.3383	0.01054	0.0307369	NA	NA
220230_s_at	CYB5R2	3.33687	0.000820429	0.00363391	NA	NA
238969_at	C3orf55	3.33635	0.00502249	0.0167401	NA	NA
202196_s_at	DKK3	3.33516	0.00350663	0.0124432	NA	NA
243932_at	---	3.33365	0.0147288	0.0405345	NA	NA
229019_at	ZNF385B	3.33258	0.0134899	0.0377675	NA	NA
217966_s_at	FAM129A	3.33048	0.000680513	0.00310343	NA	NA
203610_s_at	TRIM38	3.33024	0.00023127	0.00123399	Mesenchymal	NA
59625_at	NOL3	3.32986	3.94e-05	0.000271453	NA	NA
227657_at	RNF150	3.32967	0.00658964	0.020958	NA	NA
218346_s_at	SESN1	3.32286	4.37e-05	0.000296696	NA	NA
205501_at	PDE10A	3.32005	0.000142521	0.000816637	Proneural	NA
219863_at	HERC5	3.31924	0.00636637	0.0203747	NA	NA
236115_at	HTR7P	3.31684	7.34e-07	9.12e-06	NA	NA
215945_s_at	TRIM2	3.31665	1.77e-10	8.64e-09	NA	NA
209892_at	FUT4	3.31608	0.00346027	0.0123066	NA	NA
201469_s_at	SHC1	3.31564	2.2e-10	1.04e-08	Mesenchymal	NA
1558295_a_at	PPFIA2	3.31337	0.0309563	0.0746499	Neural	NA
219684_at	RTP4	3.30914	9.33e-05	0.000567533	NA	NA
226756_at	---	3.30631	0.0312393	0.0752262	NA	NA
1557312_at	C12orf61	3.30393	0.000464933	0.00224283	NA	NA
205357_s_at	AGTR1	3.30197	0.0893273	0.174908	NA	NA
1555097_a_at	PTGFR	3.29841	0.00447286	0.0152019	NA	NA
239582_at	PML	3.29611	1.92e-07	2.91e-06	NA	NA
227662_at	SYNPO2	3.29563	0.0164793	0.0444942	NA	NA
219985_at	HS3ST3A1	3.29228	0.190112	0.315297	NA	NA
214587_at	COL8A1	3.29088	0.0111525	0.032225	NA	NA
218566_s_at	CHORDC1	3.28951	2.09e-09	6.61e-08	NA	NA
228115_at	---	3.28697	0.000466762	0.00225026	NA	NA
230266_at	RAB7B	3.28617	1.75e-05	0.000135894	NA	NA
225262_at	FOSL2	3.28565	0.00237832	0.00897099	NA	Mesenchymal
1557078_at	SLFN5	3.28442	0.014068	0.0390706	NA	NA
226017_at	CMTM7	3.28253	0.000908923	0.00396548	NA	NA
219330_at	VANGL1	3.28092	2.91e-06	2.93e-05	NA	NA
202828_s_at	MMP14	3.28059	6.99e-08	1.24e-06	NA	NA
1554314_at	C6orf141	3.27956	6.16e-06	5.56e-05	NA	NA
218109_s_at	MFSD1	3.27898	1.44e-10	7.34e-09	Mesenchymal	NA
1555892_s_at	LOC253039	3.27631	0.000722826	0.00326373	NA	NA
241371_at	---	3.27584	0.000740381	0.00332679	NA	NA
221566_s_at	NOL3	3.2751	3.74e-05	0.000259966	NA	NA
1560017_at	TMTC3	3.27241	3.95e-09	1.13e-07	NA	NA
227371_at	BAIAP2L1	3.27216	0.00572314	0.0186524	NA	NA
1570301_at	---	3.2697	7.72e-10	2.9e-08	NA	NA
1563754_at	GRIK2	3.26949	8.76e-06	7.5e-05	NA	NA
207754_at	RASSF8	3.26648	6.38e-06	5.73e-05	NA	NA
211518_s_at	BMP4	3.26612	0.0280277	0.068709	NA	NA
243556_at	NGEF	3.26525	1.78e-05	0.000137511	NA	NA
231909_x_at	ODF2L	3.26445	2.03e-05	0.00015444	NA	NA
203735_x_at	PPFIBP1	3.26421	1.85e-08	4.05e-07	NA	NA
203333_at	KIFAP3	3.25993	1.42e-11	1.1e-09	NA	NA
218823_s_at	KCTD9	3.2586	1.08e-11	8.82e-10	NA	NA
211744_s_at	CD58	3.25696	4.7e-07	6.24e-06	NA	NA
242770_at	LOC642236	3.25558	0.000442804	0.00215184	NA	NA
207198_s_at	LIMS1	3.25462	1.14e-07	1.85e-06	NA	NA
243115_at	---	3.25408	0.000473405	0.00227727	NA	NA
203700_s_at	DIO2	3.2523	0.00370918	0.0130225	NA	NA
225941_at	EIF4E3	3.25228	0.00477668	0.0160509	NA	NA
215177_s_at	ITGA6	3.24822	2.3e-14	6.94e-12	NA	NA
39582_at	CYLD	3.24642	2.37e-07	3.48e-06	NA	NA
220241_at	TMCO3	3.24618	4.77e-10	1.95e-08	NA	NA
233020_at	---	3.24516	2.26e-07	3.34e-06	NA	NA
213905_x_at	BGN	3.24369	0.0218539	0.0562023	NA	NA
207242_s_at	GRIK1	3.24332	0.0617568	0.130775	Classical	NA
206377_at	FOXF2	3.23746	2.8e-05	0.000203145	NA	NA
214436_at	FBXL2	3.23511	3.57e-05	0.000250008	NA	NA
227705_at	TCEAL7	3.22885	6.13e-14	1.48e-11	NA	NA
211892_s_at	PTGIS	3.22688	0.0130253	0.0366736	NA	NA
229480_at	---	3.22682	0.000611411	0.0028296	NA	NA
240509_s_at	GREM2	3.22678	0.00221907	0.00845312	NA	NA
211922_s_at	CAT	3.226	5.13e-09	1.39e-07	NA	NA
218986_s_at	DDX60	3.22596	7.89e-09	1.98e-07	NA	NA
224698_at	ESYT2	3.22571	7.99e-09	2e-07	NA	NA
203075_at	SMAD2	3.22561	2.05e-09	6.49e-08	NA	NA
203151_at	MAP1A	3.2248	4.9e-05	0.000327487	NA	NA
217967_s_at	FAM129A	3.22326	0.000548599	0.00258241	NA	NA
222455_s_at	PARVA	3.22053	0.000113016	0.000667583	NA	NA
1559322_at	LOC727916	3.2194	3.57e-06	3.48e-05	NA	NA
220066_at	NOD2	3.21793	5.73e-05	0.000374917	Mesenchymal	NA
209200_at	MEF2C	3.21714	0.0399173	0.0918861	NA	NA
213567_at	---	3.21691	2.68e-05	0.000195169	NA	NA
215223_s_at	SOD2	3.21615	1.79e-05	0.00013853	NA	NA
204342_at	SLC25A24	3.21606	5.06e-06	4.7e-05	NA	NA
204584_at	L1CAM	3.21461	0.096627	0.186252	NA	NA
220983_s_at	SPRY4	3.21306	3.42e-09	9.97e-08	NA	NA
1557458_s_at	SHB	3.21206	1.72e-06	1.88e-05	NA	NA
1558683_a_at	HMGA2	3.21002	0.0485585	0.10779	NA	NA
209498_at	CEACAM1	3.20715	0.00858028	0.0259933	NA	NA
235476_at	TRIM59	3.20621	1.04e-05	8.68e-05	NA	NA
213865_at	DCBLD2	3.20592	0.0315033	0.0757583	Mesenchymal	NA
204820_s_at	BTN3A2 /// BTN3A3	3.20443	2.17e-11	1.53e-09	NA	NA
236937_at	VPS8	3.20238	4.71e-09	1.3e-07	NA	NA
208454_s_at	PGCP	3.19664	0.00309094	0.0111986	Mesenchymal	NA
229319_at	---	3.19333	1.49e-05	0.000118729	NA	NA
201616_s_at	CALD1	3.19137	6.37e-12	5.85e-10	NA	NA
206034_at	SERPINB8	3.19125	9.28e-05	0.000564982	NA	NA
229585_at	ADAMTSL1	3.18857	0.0238765	0.0603368	NA	NA
1557348_at	---	3.18798	3.53e-07	4.88e-06	NA	NA
218820_at	C14orf132	3.18666	1.18e-12	1.57e-10	NA	NA
1564796_at	EMP1	3.1834	0.00646744	0.0206347	NA	NA
205874_at	ITPKA	3.18301	0.0158143	0.0430108	NA	NA
222808_at	ALG13	3.18124	1.9e-12	2.25e-10	NA	NA
231925_at	---	3.17956	0.000166335	0.000929932	NA	NA
228032_s_at	DENND1B	3.17827	2.21e-11	1.55e-09	NA	NA
229432_at	NAGS	3.17754	0.00040188	0.00197624	NA	NA
201847_at	LIPA	3.17546	0.0171666	0.0460247	NA	NA
225955_at	METRNL	3.17485	6.76e-05	0.000430421	NA	NA
211564_s_at	PDLIM4	3.1736	0.142541	0.252067	NA	Mesenchymal
220272_at	BNC2	3.17264	0.0423438	0.0964483	Mesenchymal	NA
219432_at	EVC	3.17194	0.0018806	0.00735809	NA	NA
205952_at	KCNK3	3.17182	1.35e-06	1.53e-05	NA	NA
221567_at	NOL3	3.17147	5.14e-05	0.000341017	NA	NA
210542_s_at	SLCO3A1	3.17031	2.54e-08	5.3e-07	NA	NA
235801_at	---	3.16936	0.0651503	0.136348	NA	NA
215034_s_at	TM4SF1	3.16907	0.0058508	0.0189949	NA	NA
236281_x_at	HTR7	3.16602	0.00572365	0.018653	NA	NA
234303_s_at	GPR85	3.16478	0.00960236	0.028482	NA	NA
231916_at	EXOSC6	3.16238	0.00934789	0.0278709	NA	NA
233907_s_at	SERTAD4	3.162	0.000182425	0.00100718	NA	NA
226682_at	RORA	3.16119	1.08e-07	1.78e-06	NA	NA
215071_s_at	HIST1H2AC	3.16086	0.000279386	0.00144928	NA	NA
203642_s_at	COBLL1	3.15888	1.48e-05	0.000117845	NA	NA
243999_at	SLFN5	3.1576	0.013241	0.0371639	NA	NA
226338_at	TMEM55A	3.15678	6.23e-08	1.13e-06	NA	NA
1559462_at	---	3.15533	0.0202006	0.0526915	NA	NA
1552890_a_at	CABP4	3.1552	3.69e-05	0.000257269	NA	NA
204678_s_at	KCNK1	3.15439	0.00572587	0.0186557	Neural	NA
226770_at	MAGI3	3.15187	7.71e-05	0.000482284	NA	NA
213437_at	RUFY3	3.14948	2.74e-09	8.28e-08	Proneural	NA
236277_at	---	3.14653	0.0172416	0.0461874	NA	NA
205872_x_at	PDE4DIP	3.14634	5.7e-05	0.000373389	NA	NA
219714_s_at	CACNA2D3	3.14622	0.00263038	0.00976346	NA	NA
220945_x_at	MANSC1	3.14592	0.00276363	0.0101752	NA	NA
230715_at	ZNF518B	3.14291	7.02e-09	1.8e-07	NA	NA
200974_at	ACTA2	3.14139	0.0427681	0.0972487	NA	NA
208322_s_at	ST3GAL1	3.14075	0.000131271	0.000761121	NA	NA
219221_at	ZBTB38	3.14018	6.61e-12	6.04e-10	NA	NA
238213_at	---	3.1401	0.00913597	0.0273674	NA	NA
201251_at	PKM2	3.13864	2.54e-12	2.85e-10	NA	NA
208654_s_at	CD164	3.13523	4.74e-07	6.28e-06	NA	NA
203716_s_at	DPP4	3.13172	2.68e-07	3.85e-06	NA	NA
235661_at	---	3.13121	0.0358089	0.0841001	NA	NA
32042_at	ENOX2	3.13036	3.24e-12	3.44e-10	NA	NA
224565_at	NEAT1	3.12752	1.3e-06	1.48e-05	NA	NA
220141_at	C11orf63	3.12457	0.0112252	0.032389	NA	NA
204084_s_at	CLN5	3.12447	3.11e-07	4.39e-06	NA	NA
240616_at	LOC100131110	3.12255	1.7e-05	0.000132457	NA	NA
226185_at	CDS1	3.12099	0.00314011	0.0113492	NA	NA
212149_at	EFR3A	3.1192	2.09e-21	3.81e-17	NA	NA
228153_at	RNF144B	3.11913	0.0231263	0.0587725	NA	NA
222847_s_at	EGLN3	3.11893	0.0362626	0.0849613	NA	NA
230250_at	PTPRB	3.11851	0.000436871	0.00212622	NA	NA
1556261_a_at	---	3.11424	2.01e-06	2.14e-05	NA	NA
204533_at	CXCL10	3.11345	0.0176739	0.0471882	NA	NA
210978_s_at	TAGLN2	3.11342	1.54e-09	5.14e-08	NA	NA
230352_at	PRPS2	3.11318	0.000588161	0.00273744	NA	NA
204509_at	CA12	3.11158	0.000581892	0.00271505	NA	NA
205032_at	ITGA2	3.11152	5.8e-09	1.54e-07	NA	NA
221935_s_at	C3orf64	3.11112	2.13e-05	0.000160647	NA	NA
211782_at	IDS	3.1111	6.78e-09	1.75e-07	NA	NA
204813_at	MAPK10	3.11076	3.44e-05	0.000241954	NA	NA
219885_at	SLFN12	3.11006	9.22e-07	1.11e-05	NA	NA
226809_at	LOC100216479	3.10963	0.00480814	0.0161428	NA	NA
219924_s_at	ZMYM6	3.10878	2.14e-17	3.77e-14	NA	NA
227004_at	---	3.10647	4.62e-06	4.34e-05	NA	NA
213201_s_at	TNNT1	3.10637	6.47e-05	0.000415367	NA	NA
232298_at	hCG_1806964	3.10618	2.79e-05	0.000202452	NA	NA
209373_at	MALL	3.10535	0.00306554	0.0111242	NA	NA
219397_at	COQ10B	3.10519	1.36e-11	1.05e-09	NA	NA
229150_at	---	3.10465	0.00302077	0.0109829	NA	NA
228796_at	CPNE4	3.10084	0.0257496	0.0641687	NA	NA
225895_at	SYNPO2	3.1007	0.00399505	0.0138518	NA	NA
204214_s_at	RAB32	3.09993	1.45e-05	0.000115866	Mesenchymal	NA
218501_at	ARHGEF3	3.0991	9.34e-14	2.08e-11	NA	NA
210572_at	PCDHA2	3.09876	0.00811056	0.0248206	NA	NA
234219_at	---	3.0964	0.0019266	0.00749879	NA	NA
226099_at	ELL2	3.09515	2.24e-05	0.000167714	NA	NA
241412_at	BTC	3.09391	0.00110157	0.00466561	NA	NA
232612_s_at	ATG16L1	3.09364	0.00517838	0.0171582	NA	NA
225532_at	CABLES1	3.09333	0.00762684	0.0236413	NA	NA
225939_at	EIF4E3	3.09222	0.00682969	0.0215675	NA	NA
205891_at	ADORA2B	3.09156	0.0141273	0.0391908	NA	NA
204332_s_at	AGA	3.0895	3.45e-09	1.01e-07	NA	NA
228486_at	SLC44A1	3.08904	0.0171937	0.0460798	NA	NA
229596_at	AMDHD1	3.08871	0.00185726	0.0072824	NA	NA
208937_s_at	ID1	3.08311	0.00097915	0.00422634	NA	NA
218901_at	PLSCR4	3.08214	0.0435131	0.0985821	NA	NA
237413_at	---	3.08175	3.11e-05	0.000222019	NA	NA
227391_x_at	LRRFIP1	3.07928	1.15e-08	2.72e-07	Mesenchymal	NA
228280_at	ZC3HAV1L	3.07819	1.15e-13	2.47e-11	NA	NA
204339_s_at	RGS4	3.07798	5.24e-06	4.84e-05	NA	NA
214374_s_at	PPFIBP1	3.07525	1.36e-06	1.54e-05	NA	NA
202273_at	PDGFRB	3.07507	4.43e-06	4.18e-05	NA	NA
1554140_at	WDR78	3.07504	4.4e-05	0.00029821	NA	NA
1568658_at	C2orf74	3.07301	2.31e-13	4.24e-11	NA	NA
212157_at	SDC2	3.0714	0.00166282	0.0066361	NA	NA
204187_at	GMPR	3.07096	0.000248824	0.00131165	NA	NA
205505_at	GCNT1	3.07089	0.000562287	0.00263858	Mesenchymal	NA
1557636_a_at	C7orf57	3.06997	0.00670559	0.0212452	NA	NA
237622_at	---	3.06943	0.0256467	0.0639647	NA	NA
216235_s_at	EDNRA	3.06644	0.00172806	0.00685197	NA	NA
203426_s_at	IGFBP5	3.06595	0.00141959	0.00579312	NA	NA
201302_at	ANXA4	3.06549	5.18e-05	0.000343112	Mesenchymal	NA
1558487_a_at	TMED4	3.06531	3.87e-06	3.74e-05	NA	NA
212535_at	MEF2A	3.06476	2.96e-13	5.17e-11	NA	NA
1564964_at	---	3.06438	0.0292882	0.0712749	NA	NA
37965_at	PARVB	3.06417	4.55e-11	2.79e-09	NA	NA
216942_s_at	CD58	3.06379	4.26e-07	5.73e-06	NA	NA
226671_at	LAMP2	3.06285	3.58e-10	1.54e-08	NA	NA
240236_at	STXBP5L	3.06279	0.0073895	0.0230448	NA	NA
242964_at	---	3.06187	0.169555	0.288395	NA	NA
212390_at	PDE4DIP	3.06185	4.19e-06	3.99e-05	NA	NA
228946_at	INTU	3.06163	0.0002888	0.0014918	NA	NA
231367_s_at	LOC647131	3.06158	1.83e-12	2.18e-10	NA	NA
206385_s_at	ANK3	3.05947	0.104875	0.198472	NA	NA
218326_s_at	LGR4	3.05806	0.00556281	0.0182069	NA	NA
236106_at	---	3.0522	5.18e-11	3.13e-09	NA	NA
227007_at	TMCO4	3.05217	1.42e-10	7.26e-09	NA	NA
220643_s_at	FAIM	3.05189	5.93e-06	5.39e-05	NA	NA
228540_at	QKI	3.05163	6.15e-09	1.62e-07	NA	NA
220032_at	C7orf58	3.05045	5.07e-08	9.44e-07	NA	NA
202166_s_at	PPP1R2	3.04966	2.74e-06	2.79e-05	NA	NA
1556588_at	C15orf37	3.04947	4.55e-13	7.27e-11	NA	NA
236468_at	---	3.04848	0.0574363	0.123441	NA	NA
240512_x_at	KCTD4	3.04835	0.00461933	0.0156105	NA	NA
202609_at	EPS8	3.04362	3.86e-08	7.52e-07	NA	NA
238250_at	LOC100133236	3.04302	0.00167936	0.00669282	NA	NA
204814_at	CADPS	3.04182	0.0104629	0.0305399	NA	NA
218676_s_at	PCTP	3.04181	3.63e-12	3.72e-10	NA	NA
203060_s_at	PAPSS2	3.04079	0.177495	0.298822	NA	NA
229225_at	NRP2	3.03992	1.75e-07	2.67e-06	NA	NA
204546_at	KIAA0513	3.03689	8.05e-05	0.000500235	NA	NA
205808_at	ASPH	3.03456	0.000330081	0.00167011	NA	NA
208868_s_at	GABARAPL1	3.03381	4.16e-10	1.74e-08	NA	NA
219023_at	C4orf16	3.03368	3.73e-07	5.12e-06	NA	NA
236035_at	---	3.03305	0.00929012	0.0277349	NA	NA
227326_at	MXRA7	3.0313	7.96e-11	4.47e-09	NA	NA
219696_at	DENND1B	3.03108	1.75e-13	3.42e-11	NA	NA
227954_at	ITPRIPL2	3.0299	3.35e-08	6.68e-07	NA	NA
224461_s_at	AIFM2	3.0294	9.3e-06	7.88e-05	NA	NA
205173_x_at	CD58	3.02757	6.1e-07	7.78e-06	NA	NA
229845_at	MAPKAP1	3.02749	1.65e-05	0.000129676	NA	NA
228919_at	---	3.02512	4.63e-05	0.000311781	NA	NA
200632_s_at	NDRG1	3.02232	2.41e-08	5.07e-07	NA	NA
217118_s_at	C22orf9	3.02169	2.15e-11	1.52e-09	NA	NA
206081_at	SLC24A1	3.02026	1.36e-07	2.16e-06	NA	NA
223194_s_at	SLC22A23	3.01939	3.17e-05	0.000225752	NA	NA
205073_at	CYP2J2	3.01728	0.00288206	0.0105546	NA	NA
206421_s_at	SERPINB7	3.01645	0.0056569	0.0184629	NA	NA
225450_at	AMOTL1	3.01538	8.82e-12	7.5e-10	NA	NA
232568_at	MGC24103	3.01463	0.0104864	0.0305981	NA	NA
209546_s_at	APOL1	3.01429	1.81e-06	1.96e-05	NA	NA
227514_at	ITPRIPL2	3.01243	4e-08	7.74e-07	NA	NA
235279_at	---	3.01178	3.54e-05	0.000248128	NA	NA
209966_x_at	ESRRG	3.01167	0.000171257	0.000954678	NA	NA
202375_at	SEC24D	3.01051	3.84e-05	0.000266004	Mesenchymal	NA
238581_at	GBP5	3.00927	0.00641773	0.0205039	NA	NA
203413_at	NELL2	3.00767	0.010216	0.0299593	NA	NA
209199_s_at	MEF2C	3.00688	0.0603961	0.128544	NA	NA
239891_x_at	RAB12	3.00154	1.89e-13	3.6e-11	NA	NA
1558971_at	THEMIS	3.00147	0.00384284	0.0134057	NA	NA
227647_at	KCNE3	2.99923	0.00102484	0.00438923	NA	NA
202768_at	FOSB	2.99763	3.38e-08	6.74e-07	NA	NA
210677_at	SOAT2	2.9973	1.15e-11	9.26e-10	NA	NA
211959_at	IGFBP5	2.99578	2.39e-07	3.49e-06	NA	NA
238469_at	OGFRL1	2.995	1.78e-05	0.000137855	NA	NA
224657_at	ERRFI1	2.99216	2.2e-06	2.32e-05	NA	NA
202625_at	LYN	2.99029	0.0130469	0.0367265	NA	NA
238425_at	---	2.99019	6.43e-08	1.16e-06	NA	NA
229685_at	LOC100134937	2.98968	3.59e-11	2.29e-09	NA	NA
226677_at	ZNF521	2.98914	1.53e-05	0.000121221	NA	NA
229678_at	LOC728431	2.98849	9.95e-06	8.36e-05	NA	NA
209387_s_at	TM4SF1	2.98536	0.00691695	0.0217961	NA	NA
225566_at	NRP2	2.98441	3.04e-07	4.29e-06	NA	NA
230131_x_at	ARSD	2.98403	2.46e-10	1.14e-08	NA	NA
238693_at	PHC3	2.98395	6.08e-07	7.76e-06	NA	NA
203404_at	ARMCX2	2.98155	0.000141204	0.000810535	NA	NA
218446_s_at	FAM18B	2.98077	1.39e-07	2.19e-06	NA	NA
214451_at	TFAP2B	2.98042	0.0222479	0.0570038	NA	NA
223510_at	NRP2	2.97846	7.93e-05	0.000493925	NA	NA
239269_at	---	2.97736	0.000407243	0.00199856	NA	NA
219304_s_at	PDGFD	2.9763	0.000804626	0.00357463	NA	NA
224802_at	NDFIP2	2.97579	2.04e-15	1.08e-12	NA	NA
225673_at	MYADM	2.97445	4.21e-05	0.000287754	NA	NA
227792_at	ITPRIPL2	2.97339	6.62e-09	1.72e-07	NA	NA
207571_x_at	C1orf38	2.97159	0.000366899	0.00182806	Mesenchymal	NA
218651_s_at	LARP6	2.9682	0.000146099	0.000833639	NA	NA
227441_s_at	ANKS1B	2.9641	0.00678668	0.0214539	Neural	NA
225968_at	PRICKLE2	2.96108	0.00108955	0.00462472	NA	NA
224252_s_at	FXYD5	2.96089	0.0164309	0.0443894	Mesenchymal	NA
214660_at	PELO	2.9588	0.00538947	0.0177437	NA	NA
216243_s_at	IL1RN	2.9531	0.00286954	0.0105184	NA	NA
228603_at	---	2.95161	2.12e-08	4.53e-07	NA	NA
226743_at	SLFN11	2.95078	0.00669704	0.0212292	NA	NA
236465_at	RNF175	2.95006	0.104714	0.19827	NA	NA
241879_at	---	2.9482	0.000192016	0.00105301	NA	NA
221291_at	ULBP2	2.94764	1.67e-06	1.83e-05	NA	NA
212235_at	PLXND1	2.94759	3.73e-10	1.59e-08	NA	NA
228345_at	CHIC1	2.94633	1.94e-07	2.93e-06	NA	NA
216064_s_at	AGA	2.94495	3.94e-09	1.12e-07	NA	NA
229059_at	C9orf109 /// C9orf110	2.94344	0.001126	0.0047525	NA	NA
214349_at	---	2.94215	0.0219716	0.0564492	NA	NA
216039_at	LOC100132832 /// LOC100289811 /// LOC441259 /// PMS2 /// PMS2L1 /// PMS2L2 /// PMS2L3 /// PMS2L5	2.94212	0.00928337	0.0277193	NA	NA
210345_s_at	DNAH9	2.94111	0.0326373	0.0780101	NA	NA
238965_at	C21orf2	2.94059	1.36e-12	1.75e-10	NA	NA
235456_at	---	2.93769	0.000967886	0.004184	NA	NA
213188_s_at	MINA	2.93666	1.31e-15	8.32e-13	NA	NA
210078_s_at	KCNAB1	2.93587	6.6e-07	8.33e-06	NA	NA
203457_at	STX7	2.93439	8.64e-12	7.42e-10	NA	NA
1556488_s_at	C3orf15	2.93341	2.34e-06	2.44e-05	NA	NA
236089_at	---	2.93248	0.00199475	0.00771471	NA	NA
1568820_a_at	BEND6	2.93224	2.56e-05	0.000188103	NA	NA
202765_s_at	FBN1	2.93062	0.0453417	0.101981	NA	NA
213993_at	SPON1	2.93014	0.0229455	0.0583986	NA	NA
239302_s_at	---	2.92888	0.00169384	0.00674075	NA	NA
235503_at	ASB5	2.92828	0.0184928	0.0489682	NA	NA
214307_at	HGD	2.92751	0.00464952	0.0156941	NA	NA
228051_at	LOC202451	2.92684	1.59e-05	0.000125434	NA	NA
235704_at	DAZAP2	2.92678	3.51e-06	3.43e-05	NA	NA
202201_at	BLVRB	2.92648	6.7e-12	6.11e-10	Mesenchymal	NA
239449_at	---	2.92558	1.04e-07	1.71e-06	NA	NA
224746_at	KIAA1522	2.92516	6.07e-05	0.000392863	NA	NA
223723_at	MFI2	2.9249	0.0124938	0.035412	NA	NA
225425_s_at	MRPL41	2.92304	0.00179065	0.00706375	NA	NA
221024_s_at	SLC2A10	2.92019	0.00135271	0.00555542	Classical	NA
230463_at	---	2.91866	0.00722445	0.0226152	NA	NA
206023_at	NMU	2.91814	0.0928071	0.180366	NA	NA
224911_s_at	DCBLD2	2.91652	0.0134936	0.0377722	Mesenchymal	NA
211117_x_at	ESR2	2.91634	0.00728732	0.0227807	NA	NA
1559921_at	PECAM1	2.91421	2.83e-07	4.04e-06	NA	NA
204341_at	TRIM16	2.9135	0.000157703	0.000889273	NA	NA
221606_s_at	NSBP1	2.91158	2.28e-07	3.37e-06	NA	NA
227976_at	LOC644538	2.91117	6.04e-10	2.37e-08	NA	NA
242023_at	ABHD4	2.91049	1.47e-06	1.65e-05	NA	NA
227782_at	ZBTB7C	2.90898	7.37e-05	0.000463945	NA	NA
225868_at	TRIM47	2.90819	3.45e-08	6.85e-07	NA	NA
225057_at	SLC15A4	2.90531	1.25e-09	4.32e-08	NA	NA
213429_at	---	2.90474	0.163827	0.280889	NA	NA
227088_at	PDE5A	2.90316	0.000733512	0.00330244	NA	NA
1552275_s_at	PXK	2.90192	0.000542487	0.0025565	NA	NA
219761_at	CLEC1A	2.901	0.070443	0.145163	NA	NA
211071_s_at	MLLT11	2.90029	9.93e-07	1.18e-05	Proneural	NA
204944_at	PTPRG	2.89995	1.5e-06	1.67e-05	NA	NA
223502_s_at	TNFSF13B	2.89919	0.00180974	0.00712828	NA	NA
1554503_a_at	OSCAR	2.89756	0.00273503	0.0100862	NA	NA
211370_s_at	MAP2K5	2.89719	0.00885848	0.0266853	NA	NA
201617_x_at	CALD1	2.89634	1.29e-08	2.98e-07	NA	NA
1555786_s_at	C14orf34	2.89621	5.57e-11	3.32e-09	NA	NA
201287_s_at	SDC1	2.89483	0.000568833	0.00266389	NA	NA
229656_s_at	EML6	2.89475	0.0688108	0.142476	NA	NA
202439_s_at	IDS	2.89347	4.22e-08	8.08e-07	NA	NA
228773_at	---	2.89178	2.6e-12	2.89e-10	NA	NA
241966_at	MYO5A	2.88882	1.71e-09	5.6e-08	NA	NA
212242_at	TUBA4A	2.88643	5.93e-05	0.000385604	NA	NA
1553559_at	TMEM171	2.88246	0.00022927	0.00122463	NA	NA
213112_s_at	SQSTM1	2.88209	0.000465454	0.00224455	NA	NA
229441_at	PRSS23	2.88183	3.28e-05	0.000232537	NA	NA
214684_at	MEF2A	2.88105	1.67e-09	5.48e-08	NA	NA
1552712_a_at	NMNAT2	2.88018	2.01e-05	0.000152663	NA	NA
221020_s_at	SLC25A32	2.87909	4.43e-10	1.83e-08	NA	NA
236038_at	---	2.87766	0.0364019	0.0852475	NA	NA
215847_at	HERC2P3	2.87733	0.0173065	0.0463204	NA	NA
205207_at	IL6	2.87588	0.00037585	0.00186543	NA	NA
201261_x_at	BGN	2.87473	0.0175345	0.0468595	NA	NA
1556331_a_at	---	2.87429	5.91e-09	1.56e-07	NA	NA
239982_at	---	2.86806	4.03e-11	2.53e-09	NA	NA
229139_at	JPH1	2.86632	0.0512665	0.11262	NA	NA
203337_x_at	ITGB1BP1	2.86603	1.15e-06	1.33e-05	NA	NA
204236_at	FLI1	2.86599	0.00417025	0.0143492	NA	NA
204834_at	FGL2	2.86362	0.0426639	0.0970642	NA	NA
[truncated: 16,215 more rows]

## Sheet: S7 Combined_Cor
Dataset S7: Genome-wide survival analysis.
Probeset ID	Gene symbol	Entrez gene ID	p-value	FDR
208883_at	UBR5	51366	4.23097e-09	6.72715e-05
207469_s_at	PIR	8544	6.0564e-09	6.72715e-05
219661_at	RANBP17	64901	1.38148e-08	0.000102299
210115_at	RPL39L	116832	1.94583e-08	0.000104103
208933_s_at	LGALS8	3964	2.59575e-08	0.000104103
211666_x_at	RPL3	6122	2.8117e-08	0.000104103
200094_s_at	EEF2	1938	3.46667e-08	0.000110017
214175_x_at	PDLIM4	8572	4.94483e-08	0.000137312
205476_at	CCL20	6364	1.24144e-07	0.00030643
202709_at	FMOD	2331	2.18484e-07	0.000485361
215963_x_at	NA	NA	2.44028e-07	0.000492826
212758_s_at	ZEB1	6935	2.91305e-07	0.000493654
59625_at	NOL3	8996	2.99239e-07	0.000493654
208934_s_at	LGALS8	3964	3.11103e-07	0.000493654
209027_s_at	ABI1	10006	4.58515e-07	0.000637936
202136_at	ZMYND11	10771	4.72227e-07	0.000637936
211564_s_at	PDLIM4	8572	5.21501e-07	0.000637936
202289_s_at	TACC2	10579	5.38663e-07	0.000637936
215506_s_at	DIRAS3	9077	6.39739e-07	0.000637936
204102_s_at	EEF2	1938	6.66277e-07	0.000637936
218552_at	ECHDC2	55268	6.70804e-07	0.000637936
37028_at	PPP1R15A	23645	6.82543e-07	0.000637936
211924_s_at	PLAUR	5329	6.84273e-07	0.000637936
202605_at	GUSB	2990	6.89195e-07	0.000637936
204892_x_at	EEF1A1	1915	9.70373e-07	0.000842235
210774_s_at	NCOA4	8031	1.00254e-06	0.000842235
203484_at	SEC61G	23480	1.02365e-06	0.000842235
209665_at	CYB561D2	11068	1.26527e-06	0.00100386
200650_s_at	LDHA	3939	1.38383e-06	0.00106007
205807_s_at	TUFT1	7286	1.50283e-06	0.00106608
218876_at	TPPP3	51673	1.51772e-06	0.00106608
210222_s_at	RTN1	6252	1.53565e-06	0.00106608
200632_s_at	NDRG1	10397	1.71993e-06	0.00113966
208113_x_at	PABPC3	5042	1.84805e-06	0.00113966
215823_x_at	NA	NA	1.89331e-06	0.00113966
208691_at	TFRC	7037	1.92204e-06	0.00113966
208936_x_at	LGALS8	3964	1.93468e-06	0.00113966
218947_s_at	MTPAP	55149	1.94945e-06	0.00113966
221256_s_at	HDHD3	81932	2.28836e-06	0.00130348
201217_x_at	RPL3	6122	2.42794e-06	0.00131606
211073_x_at	RPL3	6122	2.42891e-06	0.00131606
219890_at	CLEC5A	23601	2.66731e-06	0.00138953
53720_at	C19orf66	55337	2.68961e-06	0.00138953
200811_at	CIRBP	1153	2.85649e-06	0.00144221
204205_at	APOBEC3G	60489	2.93243e-06	0.00144764
203558_at	CUL7	9820	3.00743e-06	0.00145239
202357_s_at	NA	NA	3.09082e-06	0.00146091
204361_s_at	SKAP2	8935	3.45559e-06	0.00156808
200595_s_at	EIF3A	8661	3.45888e-06	0.00156808
203098_at	CDYL	9425	3.52932e-06	0.00156808
207606_s_at	ARHGAP12	94134	3.83815e-06	0.00167185
217807_s_at	GLTSCR2	29997	4.13999e-06	0.00172726
208986_at	TCF12	6938	4.26787e-06	0.00172726
219637_at	ARMC9	80210	4.27541e-06	0.00172726
201218_at	CTBP2	1488	4.27636e-06	0.00172726
213113_s_at	SLC43A3	29015	4.72651e-06	0.00187499
209213_at	CBR1	873	5.35368e-06	0.00208653
209163_at	CYB561	1534	5.61784e-06	0.00211909
219587_at	TTC12	54970	5.62803e-06	0.00211909
202733_at	P4HA2	8974	6.26794e-06	0.00232071
214946_x_at	NA	NA	6.46527e-06	0.00235452
202116_at	DPF2	5977	6.92273e-06	0.00243469
217313_at	NA	NA	6.95435e-06	0.00243469
221726_at	RPL22	6146	7.01419e-06	0.00243469
218005_at	ZNF22	7570	8.76447e-06	0.00292351
212905_at	CSTF2T	23283	8.96134e-06	0.00292351
211874_s_at	MYST4	23522	9.03401e-06	0.00292351
212761_at	TCF7L2	6934	9.0892e-06	0.00292351
205511_at	FLJ10038	55056	9.19755e-06	0.00292351
218504_at	FAHD2A	51011	9.21205e-06	0.00292351
201028_s_at	CD99	4267	9.67238e-06	0.00302637
209417_s_at	IFI35	3430	1.00244e-05	0.00309294
203737_s_at	PPRC1	23082	1.04128e-05	0.00311384
200081_s_at	RPS6	6194	1.05487e-05	0.00311384
208935_s_at	LGALS8	3964	1.07033e-05	0.00311384
218543_s_at	PARP12	64761	1.07076e-05	0.00311384
200009_at	GDI2	2665	1.08775e-05	0.00311384
209443_at	SERPINA5	5104	1.09331e-05	0.00311384
209028_s_at	ABI1	10006	1.15772e-05	0.00320255
217336_at	NA	NA	1.17036e-05	0.00320255
218006_s_at	ZNF22	7570	1.1785e-05	0.00320255
213062_at	NTAN1	123803	1.18436e-05	0.00320255
220615_s_at	FAR2	55711	1.19654e-05	0.00320255
200715_x_at	RPL13A	23521	1.21994e-05	0.00322629
209134_s_at	RPS6	6194	1.24545e-05	0.00322747
208770_s_at	EIF4EBP2	1979	1.24944e-05	0.00322747
207332_s_at	TFRC	7037	1.28123e-05	0.00323779
214647_s_at	HFE	3077	1.28258e-05	0.00323779
202679_at	NPC1	4864	1.33939e-05	0.00333553
211937_at	EIF4B	1975	1.35133e-05	0.00333553
200607_s_at	RAD21	5885	1.39726e-05	0.003411
212039_x_at	RPL3	6122	1.43324e-05	0.0034608
217669_s_at	AKAP6	9472	1.45796e-05	0.00348265
215157_x_at	PABPC1	26986	1.49595e-05	0.00353537
215273_s_at	TADA3	10474	1.52807e-05	0.00355055
220865_s_at	PDSS1	23590	1.54888e-05	0.00355055
204867_at	GCHFR	2644	1.57044e-05	0.00355055
208630_at	HADHA	3030	1.59715e-05	0.00355055
211330_s_at	HFE	3077	1.60774e-05	0.00355055
202014_at	PPP1R15A	23645	1.60774e-05	0.00355055
208552_at	GRIK4	2900	1.61425e-05	0.00355055
201389_at	ITGA5	3678	1.6688e-05	0.00363455
211925_s_at	PLCB1	23236	1.71516e-05	0.00369273
205787_x_at	NA	NA	1.75785e-05	0.00369273
203409_at	DDB2	1643	1.75796e-05	0.00369273
218345_at	TMEM176A	55365	1.77735e-05	0.00369273
213650_at	NA	NA	1.77863e-05	0.00369273
201830_s_at	NET1	10276	1.96605e-05	0.00404406
219461_at	PAK6	56924	2.0197e-05	0.00409786
209507_at	RPA3	6119	2.0291e-05	0.00409786
217719_at	EIF3L	51386	2.08059e-05	0.004164
208882_s_at	UBR5	51366	2.17823e-05	0.00428558
217733_s_at	TMSB10	9168	2.17993e-05	0.00428558
213353_at	ABCA5	23461	2.21776e-05	0.00432172
200089_s_at	RPL4	6124	2.25121e-05	0.00434875
205819_at	MARCO	8685	2.32489e-05	0.00445223
201070_x_at	SF3B1	23451	2.34486e-05	0.00445223
208903_at	RPS28	6234	2.41553e-05	0.00446557
218590_at	C10orf2	56652	2.4214e-05	0.00446557
203016_s_at	SSX2IP	117178	2.43025e-05	0.00446557
208454_s_at	PGCP	10404	2.43229e-05	0.00446557
202018_s_at	LTF	4057	2.5059e-05	0.004563
208887_at	EIF3G	8666	2.77474e-05	0.00501145
201850_at	CAPG	822	2.8021e-05	0.00501884
208629_s_at	HADHA	3030	2.82401e-05	0.00501884
202185_at	PLOD3	8985	2.84857e-05	0.0050223
213315_x_at	CXorf40A	91966	2.90281e-05	0.00507762
222177_s_at	SCAND2	54581	3.00573e-05	0.00521658
201136_at	PLP2	5355	3.06501e-05	0.00527823
212370_x_at	NA	NA	3.12898e-05	0.00534695
220230_s_at	CYB5R2	51700	3.25172e-05	0.00551428
208953_at	LARP4B	23185	3.44464e-05	0.00579718
221526_x_at	PARD3	56288	3.49501e-05	0.00583772
207542_s_at	NA	NA	3.77503e-05	0.00625838
209581_at	PLA2G16	11145	3.81455e-05	0.00627705
202087_s_at	CTSL1	1514	3.92226e-05	0.00640683
217758_s_at	TM9SF3	56889	4.01118e-05	0.00647335
209807_s_at	NFIX	4784	4.02126e-05	0.00647335
217165_x_at	MT1F	4494	4.06874e-05	0.00650266
36084_at	CUL7	9820	4.15735e-05	0.00651795
209399_at	HLCS	3141	4.15775e-05	0.00651795
212762_s_at	TCF7L2	6934	4.16632e-05	0.00651795
201991_s_at	KIF5B	3799	4.3269e-05	0.00672182
204793_at	GPRASP1	9737	4.4859e-05	0.00683538
200095_x_at	RPS10	6204	4.51704e-05	0.00683538
214305_s_at	SF3B1	23451	4.52155e-05	0.00683538
220755_s_at	C6orf48	50854	4.52307e-05	0.00683538
218987_at	ATF7IP	55729	4.56145e-05	0.0068468
202439_s_at	IDS	3423	4.60756e-05	0.00686959
209201_x_at	CXCR4	7852	4.69774e-05	0.00691752
202003_s_at	ACAA2	10449	4.73146e-05	0.00691752
206320_s_at	SMAD9	4093	4.73312e-05	0.00691752
222288_at	NA	NA	4.80913e-05	0.00698267
212894_at	SUPV3L1	6832	4.91933e-05	0.0070963
213578_at	BMPR1A	657	5.13038e-05	0.00735299
204054_at	PTEN	5728	5.2194e-05	0.00743263
217905_at	C10orf119	79892	5.30962e-05	0.00751294
215049_x_at	CD163	9332	5.40125e-05	0.00759423
44790_s_at	C13orf18	80183	5.44054e-05	0.00760136
209030_s_at	CADM1	23705	5.50964e-05	0.00764979
206734_at	JRKL	8690	5.60263e-05	0.00773058
217092_x_at	RPL7	6129	5.67116e-05	0.00776361
211630_s_at	GSS	2937	5.69646e-05	0.00776361
203427_at	ASF1A	25842	5.83738e-05	0.00790716
214456_x_at	NA	NA	5.87336e-05	0.00790767
201992_s_at	KIF5B	3799	6.09285e-05	0.00813907
202263_at	CYB5R1	51706	6.1185e-05	0.00813907
203260_at	HDDC2	51020	6.24871e-05	0.00824414
203485_at	RTN1	6252	6.27171e-05	0.00824414
211932_at	HNRNPA3	220988	6.4008e-05	0.00827485
210581_x_at	PATZ1	23598	6.43153e-05	0.00827485
221763_at	JMJD1C	221037	6.4748e-05	0.00827485
216899_s_at	SKAP2	8935	6.50542e-05	0.00827485
204069_at	MEIS1	4211	6.5125e-05	0.00827485
212267_at	WAPAL	23063	6.51857e-05	0.00827485
216035_x_at	TCF7L2	6934	6.63188e-05	0.00837087
214433_s_at	SELENBP1	8991	6.70416e-05	0.00841429
212042_x_at	RPL7	6129	6.83347e-05	0.0085284
200725_x_at	RPL10	6134	6.94366e-05	0.00857686
201068_s_at	PSMC2	5701	6.95299e-05	0.00857686
216342_x_at	RPS4X	6191	6.98812e-05	0.00857686
205752_s_at	GSTM5	2949	7.10078e-05	0.00866725
208022_s_at	CDC14B	8555	7.202e-05	0.00874276
201219_at	NA	NA	7.38443e-05	0.00885034
213534_s_at	PASK	23178	7.38853e-05	0.00885034
217969_at	C11orf2	738	7.41014e-05	0.00885034
218404_at	SNX10	29887	7.46522e-05	0.00886845
212332_at	RBL2	5934	7.50782e-05	0.00887161
201154_x_at	RPL4	6124	7.72501e-05	0.00907995
213773_x_at	NSUN5	55695	7.8175e-05	0.00910186
212468_at	SPAG9	9043	7.82559e-05	0.00910186
205568_at	AQP9	366	7.8899e-05	0.00912886
215670_s_at	SCAND2	54581	8.02607e-05	0.00916256
208825_x_at	RPL23A	6147	8.0382e-05	0.00916256
209047_at	NA	NA	8.13784e-05	0.00916256
203054_s_at	TCTA	6988	8.15393e-05	0.00916256
208692_at	RPS3	6188	8.16428e-05	0.00916256
217988_at	CCNB1IP1	57820	8.18791e-05	0.00916256
211715_s_at	BDH1	622	8.20774e-05	0.00916256
201611_s_at	ICMT	23463	8.26968e-05	0.0091701
221042_s_at	CLMN	79789	8.29705e-05	0.0091701
217742_s_at	WAC	51322	8.38218e-05	0.00917779
211914_x_at	NF1	4763	8.42157e-05	0.00917779
37425_g_at	CCHCR1	54535	8.45838e-05	0.00917779
205462_s_at	HPCAL1	3241	8.46927e-05	0.00917779
214453_s_at	IFI44	10561	8.69032e-05	0.00933683
213857_s_at	CD47	961	8.70008e-05	0.00933683
221582_at	HIST3H2A	92815	8.82571e-05	0.00942612
218494_s_at	SLC2A4RG	56731	8.89225e-05	0.00945174
204041_at	MAOB	4129	9.02981e-05	0.00953255
213340_s_at	KIAA0495	57212	9.0541e-05	0.00953255
208697_s_at	EIF3E	3646	9.1193e-05	0.00955591
205881_at	ZNF74	7625	9.29522e-05	0.00969452
202196_s_at	DKK3	27122	9.46848e-05	0.00978698
212552_at	HPCAL1	3241	9.47198e-05	0.00978698
200600_at	MSN	4478	9.56461e-05	0.00979655
217770_at	PIGT	51604	9.5727e-05	0.00979655
203917_at	CXADR	1525	9.61354e-05	0.00979655
200869_at	NA	NA	9.76431e-05	0.00990476
201141_at	GPNMB	10457	9.84991e-05	0.00991856
218691_s_at	PDLIM4	8572	9.86722e-05	0.00991856
213629_x_at	MT1F	4494	0.000100439	0.0100388
216836_s_at	ERBB2	2064	0.000100772	0.0100388
204595_s_at	NA	NA	0.000103895	0.010299
219241_x_at	SSH3	54961	0.000104312	0.010299
200819_s_at	RPS15	6209	0.000104934	0.0103146
216174_at	HCRP1	387535	0.000107217	0.0104926
206559_x_at	EEF1A1	1915	0.000110367	0.0107535
212076_at	MLL	4297	0.000111956	0.0108044
209529_at	PPAP2C	8612	0.000112258	0.0108044
201787_at	FBLN1	2192	0.000112475	0.0108044
205139_s_at	UST	10090	0.000112835	0.0108044
203986_at	STBD1	8987	0.000116221	0.0110809
208939_at	SEPHS1	22929	0.000119825	0.0113529
206645_s_at	NR0B1	190	0.000120573	0.0113529
206172_at	IL13RA2	3598	0.000120607	0.0113529
205306_x_at	KMO	8564	0.00012169	0.0114065
202301_s_at	RSRC2	65117	0.000122259	0.0114095
213454_at	NA	NA	0.000122762	0.0114095
204528_s_at	NAP1L1	4673	0.000123263	0.0114095
214878_at	NA	NA	0.000124223	0.0114507
213224_s_at	NCRNA00081	92482	0.000126973	0.0115699
209550_at	NDN	4692	0.00012789	0.0115699
221699_s_at	DDX50	79009	0.000127912	0.0115699
200699_at	KDELR2	11014	0.000127998	0.0115699
220700_at	NA	NA	0.000128121	0.0115699
205728_at	ODZ1	10178	0.000130421	0.01173
214247_s_at	DKK3	27122	0.000132751	0.0118539
211391_s_at	PATZ1	23598	0.000133045	0.0118539
218239_s_at	GTPBP4	23560	0.000133843	0.0118539
203017_s_at	SSX2IP	117178	0.000133933	0.0118539
204865_at	CA3	761	0.000136043	0.0119929
206258_at	ST8SIA5	29906	0.000136865	0.0120176
219451_at	MSRB2	22921	0.000138108	0.012079
201254_x_at	RPS6	6194	0.000138946	0.0120822
218628_at	CCDC53	51019	0.000139233	0.0120822
211942_x_at	NA	NA	0.000142237	0.0122875
213797_at	RSAD2	91543	0.00014303	0.0122875
204846_at	CP	1356	0.000143258	0.0122875
216361_s_at	MYST3	7994	0.000144057	0.0123086
220948_s_at	ATP1A1	476	0.000145042	0.0123452
202238_s_at	NNMT	4837	0.000145922	0.0123728
209265_s_at	METTL3	56339	0.000147609	0.0124682
218878_s_at	SIRT1	23411	0.000152444	0.0128278
213661_at	PAMR1	25891	0.000155219	0.013012
200062_s_at	RPL30	6156	0.000156631	0.013081
204979_s_at	SH3BGR	6450	0.000158627	0.0131981
201870_at	TOMM34	10953	0.000159638	0.0132327
51192_at	SSH3	54961	0.000162596	0.0133604
202406_s_at	TIAL1	7073	0.00016279	0.0133604
219816_s_at	RBM23	55147	0.000162983	0.0133604
221838_at	KLHL22	84861	0.000166855	0.0136275
211094_s_at	NF1	4763	0.000169009	0.0137529
212183_at	NUDT4	11163	0.000171462	0.0138929
210731_s_at	LGALS8	3964	0.00017198	0.0138929
220443_s_at	VAX2	25806	0.000173506	0.0139654
204832_s_at	BMPR1A	657	0.000176201	0.0140387
200012_x_at	RPL21	6144	0.000176739	0.0140387
212759_s_at	TCF7L2	6934	0.000177105	0.0140387
203916_at	NDST2	8509	0.00017754	0.0140387
217848_s_at	PPA1	5464	0.000177733	0.0140387
210844_x_at	CTNNA1	1495	0.000178372	0.0140387
201871_s_at	UBXN1	51035	0.000179239	0.0140387
201293_x_at	PPIA	5478	0.000179654	0.0140387
215440_s_at	BEX4	56271	0.000180105	0.0140387
201029_s_at	CD99	4267	0.00018219	0.0141516
206858_s_at	HOXC6	3223	0.000184462	0.0142691
200962_at	RPL31	6160	0.000185503	0.0142691
200026_at	RPL34	6164	0.00018563	0.0142691
209396_s_at	CHI3L1	1116	0.000187329	0.0143501
212391_x_at	NA	NA	0.000191648	0.0145948
214613_at	GPR3	2827	0.000191838	0.0145948
217631_at	NA	NA	0.000192505	0.0145955
217644_s_at	SOS2	6655	0.000196065	0.0148149
208490_x_at	HIST1H2BF	8343	0.000199426	0.0150175
214823_at	ZNF204P	7754	0.000200098	0.0150175
217576_x_at	SOS2	6655	0.00020306	0.0150396
203645_s_at	CD163	9332	0.000203102	0.0150396
220591_s_at	EFHC2	80258	0.000203576	0.0150396
201807_at	VPS26A	9559	0.000203608	0.0150396
213720_s_at	SMARCA4	6597	0.000203778	0.0150396
209975_at	CYP2E1	1571	0.000205818	0.0151399
209816_at	PTCH1	5727	0.000207002	0.0151767
218201_at	NDUFB2	4708	0.000212627	0.0155378
209708_at	MOXD1	26002	0.000215078	0.0156356
208425_s_at	TANC2	26115	0.000215372	0.0156356
212445_s_at	NEDD4L	23327	0.000217176	0.0156393
208789_at	PTRF	284119	0.00021739	0.0156393
215695_s_at	GYG2	8908	0.000217535	0.0156393
218445_at	H2AFY2	55506	0.000221544	0.0158762
208904_s_at	RPS28	6234	0.000222435	0.0158887
201714_at	TUBG1	7283	0.000224636	0.0159679
208816_x_at	ANXA2P2	304	0.000224981	0.0159679
217546_at	MT1M	4499	0.000227602	0.0160166
222150_s_at	PION	54103	0.000227603	0.0160166
219364_at	DHX58	79132	0.00022783	0.0160166
206847_s_at	HOXA7	3204	0.000230643	0.0161124
211345_x_at	NA	NA	0.000231473	0.0161124
201281_at	ADRM1	11047	0.000231727	0.0161124
222379_at	KCNE4	23704	0.000232635	0.0161124
205705_at	ANKRD26	22852	0.000232819	0.0161124
203099_s_at	CDYL	9425	0.000234208	0.0161582
204463_s_at	EDNRA	1909	0.000240127	0.0165153
203177_x_at	TFAM	7019	0.000241797	0.0165788
202009_at	TWF2	11344	0.000244341	0.0166571
213844_at	HOXA5	3202	0.000244994	0.0166571
209183_s_at	C10orf10	11067	0.000245188	0.0166571
210137_s_at	DCTD	1635	0.000247396	0.0167558
218436_at	SIL1	64374	0.000248389	0.0167719
212224_at	ALDH1A1	216	0.000251024	0.0168985
1431_at	CYP2E1	1571	0.000253056	0.0169784
204362_at	SKAP2	8935	0.00025374	0.0169784
219387_at	CCDC88A	55704	0.000254582	0.0169836
213630_at	NACAD	23148	0.000266185	0.0176776
203798_s_at	VSNL1	7447	0.000267079	0.0176776
212452_x_at	MYST4	23522	0.000267772	0.0176776
209911_x_at	HIST1H2BD	3017	0.000268167	0.0176776
210027_s_at	APEX1	328	0.000269151	0.0176899
220744_s_at	IFT122	55764	0.00027166	0.0178022
213583_x_at	NA	NA	0.000273588	0.0178576
206178_at	PLA2G5	5322	0.000274113	0.0178576
204975_at	EMP2	2013	0.000275951	0.0179247
206900_x_at	ZNF253	56242	0.000277837	0.0179556
216119_s_at	SPEF1	25876	0.000278848	0.0179556
206506_s_at	SUPT3H	8464	0.000279222	0.0179556
204298_s_at	LOX	4015	0.00027966	0.0179556
201785_at	RNASE1	6035	0.000281556	0.0179602
211329_x_at	HFE	3077	0.000283073	0.0179602
218429_s_at	C19orf66	55337	0.00028324	0.0179602
211668_s_at	PLAU	5328	0.000284196	0.0179602
212929_s_at	NA	NA	0.000284536	0.0179602
203814_s_at	NQO2	4835	0.000284894	0.0179602
206949_s_at	RUSC1	23623	0.000285391	0.0179602
202969_at	DYRK2	8445	0.000286974	0.0179906
202974_at	MPP1	4354	0.000287829	0.0179906
215248_at	GRB10	2887	0.000288949	0.0179906
218291_at	ROBLD3	28956	0.000289553	0.0179906
219763_at	DENND1A	57706	0.000289963	0.0179906
215687_x_at	PLCB1	23236	0.000290733	0.0179906
219073_s_at	OSBPL10	114884	0.000292661	0.0179986
207060_at	EN2	2020	0.000294122	0.0179986
208309_s_at	MALT1	10892	0.000294507	0.0179986
203079_s_at	CUL2	8453	0.000295005	0.0179986
210631_at	NF1	4763	0.000295717	0.0179986
214604_at	HOXD11	3237	0.000295723	0.0179986
201599_at	OAT	4942	0.000296555	0.0179999
212788_x_at	FTL	2512	0.000298875	0.0180913
212764_at	ZEB1	6935	0.000300942	0.0181669
217747_s_at	RPS9	6203	0.00030221	0.0181849
204345_at	COL16A1	1307	0.000303145	0.0181849
211927_x_at	NA	NA	0.000304102	0.0181849
209154_at	TAX1BP3	30851	0.000304514	0.0181849
210963_s_at	GYG2	8908	0.000305785	0.0182118
218166_s_at	RSF1	51773	0.000309829	0.0184034
218761_at	RNF111	54778	0.000312299	0.0184685
221185_s_at	IQCG	84223	0.000312588	0.0184685
222217_s_at	SLC27A3	11000	0.000313647	0.0184819
210705_s_at	TRIM5	85363	0.000315659	0.0185032
216037_x_at	TCF7L2	6934	0.000316606	0.0185032
211959_at	IGFBP5	3488	0.000316867	0.0185032
202315_s_at	BCR	613	0.000317341	0.0185032
203501_at	PGCP	10404	0.000320287	0.0186261
213377_x_at	RPS12	6206	0.000325577	0.0188843
202086_at	MX1	4599	0.000329817	0.0190194
202405_at	TIAL1	7073	0.000330547	0.0190194
210018_x_at	MALT1	10892	0.000331206	0.0190194
210646_x_at	RPL13A	23521	0.000331331	0.0190194
210732_s_at	LGALS8	3964	0.000333022	0.0190672
204702_s_at	NFE2L3	9603	0.000335921	0.0191619
211978_x_at	PPIA	5478	0.000337778	0.0191619
203729_at	EMP3	2014	0.000337882	0.0191619
202442_at	AP3S1	1176	0.000338125	0.0191619
209065_at	UQCRB	7381	0.000343249	0.0194027
209258_s_at	SMC3	9126	0.000347304	0.0195219
200716_x_at	RPL13A	23521	0.000348297	0.0195219
218627_at	DRAM1	55332	0.0003485	0.0195219
201302_at	ANXA4	307	0.000348873	0.0195219
203698_s_at	FRZB	2487	0.000350448	0.0195283
201382_at	CACYBP	27101	0.000350744	0.0195283
213896_x_at	FAM149B1	317662	0.000352493	0.0195402
215279_at	NA	NA	0.000352718	0.0195402
217875_s_at	PMEPA1	56937	0.000356334	0.0196757
216322_at	CD58	965	0.000356935	0.0196757
215446_s_at	LOX	4015	0.000359125	0.0197474
211075_s_at	CD47	961	0.000360173	0.0197561
203100_s_at	CDYL	9425	0.000361417	0.0197756
209264_s_at	TSPAN4	7106	0.000363098	0.0198187
208940_at	SEPHS1	22929	0.000364235	0.0198321
212859_x_at	MT1E	4493	0.000368615	0.0199543
205664_at	KIN	22944	0.000369107	0.0199543
200596_s_at	EIF3A	8661	0.000369396	0.0199543
210871_x_at	SSX2IP	117178	0.000370691	0.0199543
218430_s_at	RFX7	64864	0.000372582	0.0199543
200696_s_at	GSN	2934	0.000373159	0.0199543
201243_s_at	ATP1B1	481	0.000373667	0.0199543
200029_at	RPL19	6143	0.000374732	0.0199543
213150_at	HOXA10	3206	0.000376608	0.0199543
221898_at	PDPN	10630	0.000376765	0.0199543
206572_x_at	ZNF85	7639	0.000376977	0.0199543
210778_s_at	MXD4	10608	0.000378227	0.0199543
202942_at	ETFB	2109	0.000378429	0.0199543
204420_at	FOSL1	8061	0.000379056	0.0199543
219691_at	SAMD9	54809	0.000381846	0.0200537
211106_at	NA	NA	0.000387973	0.0203274
210692_s_at	SLC43A3	29015	0.00039003	0.0203871
201352_at	YME1L1	10730	0.000391715	0.0204271
211068_x_at	NA	NA	0.000394213	0.0204643
208540_x_at	S100A11	6282	0.000394956	0.0204643
218634_at	PHLDA3	23612	0.000395191	0.0204643
202207_at	ARL4C	10123	0.000402242	0.0207809
211710_x_at	RPL4	6124	0.000404619	0.0208351
218424_s_at	STEAP3	55240	0.000405501	0.0208351
214611_at	GRIK1	2897	0.00040715	0.0208351
205809_s_at	WASL	8976	0.000407341	0.0208351
201641_at	BST2	684	0.000408489	0.0208351
201829_at	NET1	10276	0.000408917	0.0208351
211919_s_at	CXCR4	7852	0.000411652	0.020904
203018_s_at	SSX2IP	117178	0.000412153	0.020904
213142_x_at	PION	54103	0.000418043	0.0211545
213056_at	FRMD4B	23150	0.000421647	0.0212297
201590_x_at	ANXA2	302	0.000421691	0.0212297
212942_s_at	KIAA1199	57214	0.000422397	0.0212297
212792_at	DPY19L1	23333	0.000425348	0.0213298
209031_at	CADM1	23705	0.000426445	0.0213367
37965_at	PARVB	29780	0.000429736	0.021453
217740_x_at	RPL7A	6130	0.00043087	0.0214614
205547_s_at	TAGLN	6876	0.000439442	0.0218394
200698_at	KDELR2	11014	0.000440826	0.0218593
212191_x_at	RPL13	6137	0.000442067	0.021872
205606_at	LRP6	4040	0.000447101	0.0220719
203186_s_at	S100A4	6275	0.000455742	0.0224415
212422_at	PDCD11	22984	0.000456609	0.0224415
203880_at	COX17	10063	0.000460915	0.0226032
212496_s_at	KDM4B	23030	0.000462408	0.0226264
200810_s_at	CIRBP	1153	0.000465281	0.0227157
211392_s_at	PATZ1	23598	0.000466893	0.0227157
205702_at	PHTF1	10745	0.000467981	0.0227157
203234_at	UPP1	7378	0.000468322	0.0227157
217805_at	ILF3	3609	0.000470197	0.0227569
216559_x_at	NA	NA	0.000474902	0.0229029
201030_x_at	LDHB	3945	0.000475275	0.0229029
205584_at	ALG13	79868	0.000478066	0.0229875
202596_at	ENSA	2029	0.000480638	0.0230132
214659_x_at	YLPM1	56252	0.000481482	0.0230132
208790_s_at	PTRF	284119	0.00048181	0.0230132
204776_at	THBS4	7060	0.000482744	0.0230132
207076_s_at	ASS1	445	0.000485219	0.0230556
211373_s_at	PSEN2	5664	0.000485709	0.0230556
213347_x_at	RPS4X	6191	0.000488309	0.0231296
221247_s_at	WBSCR16	81554	0.000498694	0.0235713
203176_s_at	TFAM	7019	0.000501108	0.0235808
216511_s_at	TCF7L2	6934	0.000501549	0.0235808
209156_s_at	COL6A2	1292	0.000502081	0.0235808
209514_s_at	RAB27A	5873	0.000506059	0.0236894
203303_at	DYNLT3	6990	0.000506525	0.0236894
220658_s_at	ARNTL2	56938	0.000511368	0.0237066
218297_at	FAM188A	80013	0.000511953	0.0237066
204493_at	BID	637	0.000513163	0.0237066
220522_at	CRB1	23418	0.000513373	0.0237066
207566_at	MR1	3140	0.000513414	0.0237066
218815_s_at	TMEM51	55092	0.000513777	0.0237066
204932_at	TNFRSF11B	4982	0.000514363	0.0237066
211938_at	EIF4B	1975	0.000516961	0.023777
204187_at	GMPR	2766	0.000519584	0.0237913
209365_s_at	ECM1	1893	0.000520155	0.0237913
219679_s_at	WAC	51322	0.000520486	0.0237913
205422_s_at	ITGBL1	9358	0.00052477	0.0238826
201861_s_at	LRRFIP1	9208	0.00052524	0.0238826
204716_at	CCDC6	8030	0.000525709	0.0238826
217716_s_at	SEC61A1	29927	0.000541802	0.0245635
210058_at	MAPK13	5603	0.000545824	0.0246955
34697_at	LRP6	4040	0.000547323	0.024713
213424_at	KIAA0895	23366	0.000555932	0.0250508
218862_at	ASB13	79754	0.000559546	0.0251626
205326_at	RAMP3	10268	0.000563086	0.02518
203802_x_at	NSUN5	55695	0.000563502	0.02518
203896_s_at	PLCB4	5332	0.000564655	0.02518
212489_at	COL5A1	1289	0.000565186	0.02518
212961_x_at	CXorf40B	541578	0.0005656	0.02518
215464_s_at	TAX1BP3	30851	0.000568095	0.0252404
203268_s_at	DRG2	1819	0.000570282	0.0252871
209578_s_at	POFUT2	23275	0.00057221	0.025322
38703_at	DNPEP	23549	0.000574479	0.0253719
204239_s_at	NNAT	4826	0.000581084	0.0255766
1729_at	TRADD	8717	0.000581418	0.0255766
204169_at	IMPDH1	3614	0.000583729	0.0256275
202591_s_at	SSBP1	6742	0.000587085	0.0256678
213614_x_at	EEF1A1	1915	0.000587597	0.0256678
203466_at	MPV17	4358	0.000588113	0.0256678
217730_at	TMBIM1	64114	0.000593285	0.0258255
200654_at	P4HB	5034	0.000594589	0.0258255
203019_x_at	SSX2IP	117178	0.000595214	0.0258255
221637_s_at	C11orf48	79081	0.000601179	0.0259476
204372_s_at	KHSRP	8570	0.000601729	0.0259476
214927_at	ITGBL1	9358	0.000602201	0.0259476
212985_at	APBB2	323	0.000603579	0.0259476
213858_at	ZNF250	58500	0.000604732	0.0259476
213447_at	NA	NA	0.00060599	0.0259476
205214_at	STK17B	9262	0.000606203	0.0259476
214496_x_at	MYST4	23522	0.000609656	0.0260452
216506_x_at	MLLT10	8028	0.000612403	0.0261043
217432_s_at	IDS	3423	0.000613718	0.0261043
200660_at	S100A11	6282	0.000615228	0.0261043
201443_s_at	ATP6AP2	10159	0.000616523	0.0261043
201351_s_at	YME1L1	10730	0.000616914	0.0261043
221910_at	ETV1	2115	0.000621375	0.026243
208003_s_at	NFAT5	10725	0.000622698	0.026249
212790_x_at	RPL13A	23521	0.000624618	0.0262528
218469_at	GREM1	26585	0.000626263	0.0262528
219332_at	MICALL2	79778	0.000626333	0.0262528
205081_at	CRIP1	1396	0.000630137	0.0263159
204761_at	USP6NL	9712	0.000630207	0.0263159
219981_x_at	ZNF587	84914	0.000631798	0.0263328
204011_at	SPRY2	10253	0.000633859	0.0263544
206089_at	NELL1	4745	0.000634689	0.0263544
201012_at	ANXA1	301	0.000636204	0.0263681
201666_at	TIMP1	7076	0.000647541	0.0267879
203649_s_at	PLA2G2A	5320	0.000650087	0.0267952
207959_s_at	DNAH9	1770	0.000650128	0.0267952
207971_s_at	CEP68	23177	0.000655854	0.0269811
216380_x_at	NA	NA	0.000660181	0.0271089
213790_at	ADAM12	8038	0.000665468	0.0272132
214455_at	HIST1H2BC	8347	0.000665944	0.0272132
200809_x_at	RPL12	6136	0.000666397	0.0272132
214030_at	CRYBG3	131544	0.000672243	0.0273658
221024_s_at	SLC2A10	81031	0.000672597	0.0273658
212078_s_at	MLL	4297	0.000674271	0.0273838
204120_s_at	ADK	132	0.000675626	0.0273887
217895_at	PTCD3	55037	0.000678009	0.0274353
210707_x_at	PMS2L11	441263	0.000683757	0.0275686
203921_at	CHST2	9435	0.000683785	0.0275686
217997_at	PHLDA1	22822	0.000686747	0.0276346
208534_s_at	NA	NA	0.000688354	0.0276346
209686_at	S100B	6285	0.00068917	0.0276346
200704_at	LITAF	9516	0.000690398	0.0276346
203544_s_at	STAM	8027	0.000693928	0.0276861
209087_x_at	MCAM	4162	0.000694178	0.0276861
208843_s_at	GORASP2	26003	0.000701902	0.027944
200621_at	CSRP1	1465	0.000707034	0.0280979
219874_at	SLC12A8	84561	0.000710679	0.0281924
205073_at	CYP2J2	1573	0.000713665	0.0282119
205062_x_at	ARID4A	5926	0.000713711	0.0282119
204304_s_at	PROM1	8842	0.000727804	0.0286773
221772_s_at	PPP2R2D	55844	0.000728065	0.0286773
218264_at	BCCIP	56647	0.000731104	0.0287385
218002_s_at	CXCL14	9547	0.000732206	0.0287385
215592_at	NA	NA	0.000734309	0.0287702
213838_at	NOL7	51406	0.000736247	0.028793
219263_at	RNF128	79589	0.000737484	0.028793
212455_at	YTHDC1	91746	0.000744994	0.029014
222119_s_at	FBXO11	80204	0.000745756	0.029014
221761_at	ADSS	159	0.00075647	0.029263
210753_s_at	EPHB1	2047	0.000756597	0.029263
210845_s_at	PLAUR	5329	0.000758048	0.029263
214161_at	OSGIN2	734	0.000758324	0.029263
201482_at	QSOX1	5768	0.000758745	0.029263
200858_s_at	RPS8	6202	0.000762025	0.0293245
221885_at	DENND2A	27147	0.000765527	0.0293245
201095_at	DAP	1611	0.00076773	0.0293245
210751_s_at	RGN	9104	0.00076885	0.0293245
201845_s_at	RYBP	23429	0.000769249	0.0293245
209580_s_at	MBD4	8930	0.00077076	0.0293245
213261_at	TRANK1	9881	0.000770923	0.0293245
201301_s_at	ANXA4	307	0.000771714	0.0293245
221592_at	NA	NA	0.000772217	0.0293245
221527_s_at	PARD3	56288	0.000774847	0.0293516
209694_at	PTS	5805	0.000775573	0.0293516
218400_at	OAS3	4940	0.000788832	0.0298025
218113_at	TMEM2	23670	0.000791389	0.0298484
203078_at	CUL2	8453	0.000793603	0.0298812
213428_s_at	COL6A1	1291	0.00079631	0.0299324
205599_at	TRAF1	7185	0.000802271	0.0300931
213706_at	GPD1	2819	0.000803295	0.0300931
216397_s_at	NA	NA	0.000807741	0.0301783
218573_at	MAGEH1	28986	0.000808286	0.0301783
210519_s_at	NQO1	1728	0.000811601	0.0302512
221974_at	IPW	3653	0.000814316	0.0302722
221701_s_at	STRA6	64220	0.000817684	0.0302722
202145_at	LY6E	4061	0.000818483	0.0302722
210582_s_at	LIMK2	3985	0.000818615	0.0302722
212424_at	PDCD11	22984	0.000818977	0.0302722
210690_at	KLRC4	8302	0.000824009	0.0304076
212157_at	SDC2	6383	0.000826365	0.030444
208990_s_at	HNRNPH3	3189	0.000838086	0.0308204
210809_s_at	POSTN	10631	0.000839357	0.0308204
208858_s_at	ESYT1	23344	0.000844289	0.0309503
216806_at	NA	NA	0.000848912	0.0310146
213524_s_at	G0S2	50486	0.000849737	0.0310146
221798_x_at	RPS2	6187	0.000850232	0.0310146
207242_s_at	GRIK1	2897	0.000859034	0.0312343
203368_at	CRELD1	78987	0.000859066	0.0312343
205706_s_at	ANKRD26	22852	0.00086778	0.0314996
210818_s_at	BACH1	571	0.000875362	0.0317229
211972_x_at	RPLP0	6175	0.000878974	0.031802
203596_s_at	IFIT5	24138	0.00088192	0.0318192
201879_at	ARIH1	25820	0.000882952	0.0318192
210538_s_at	BIRC3	330	0.000883748	0.0318192
208436_s_at	IRF7	3665	0.000887013	0.0318851
204519_s_at	PLLP	51090	0.000896347	0.0320954
117_at	HSPA6	3310	0.000896919	0.0320954
203732_at	TRIP4	9325	0.000897198	0.0320954
208546_x_at	HIST1H2BH	8345	0.000899295	0.0321187
213126_at	MED8	112950	0.000901495	0.0321456
209153_s_at	TCF3	6929	0.000910236	0.0323573
209227_at	TUSC3	7991	0.000910346	0.0323573
210985_s_at	SP100	6672	0.00091984	0.032598
219527_at	MOSC2	54996	0.000921265	0.032598
211880_x_at	PCDHGA1	56114	0.000921518	0.032598
212933_x_at	RPL13	6137	0.000926543	0.0326948
202995_s_at	FBLN1	2192	0.000929475	0.0326948
220239_at	KLHL7	55975	0.000931689	0.0326948
216336_x_at	NA	NA	0.00093217	0.0326948
212448_at	NEDD4L	23327	0.00093266	0.0326948
214623_at	NA	NA	0.000933086	0.0326948
218100_s_at	IFT57	55081	0.000937053	0.0327353
201125_s_at	ITGB5	3693	0.00093719	0.0327353
202386_s_at	KIAA0430	9665	0.0009413	0.0328006
212315_s_at	NUP210	23225	0.000942012	0.0328006
205880_at	PRKD1	5587	0.000948974	0.0329913
205824_at	HSPB2	3316	0.000951308	0.0329961
209988_s_at	ASCL1	429	0.000952082	0.0329961
204044_at	QPRT	23475	0.000954254	0.0330199
209410_s_at	GRB10	2887	0.000964615	0.0333265
202476_s_at	TUBGCP2	10844	0.00097024	0.0334688
202237_at	NNMT	4837	0.000972781	0.0335044
203906_at	IQSEC1	9922	0.000976612	0.0335692
216653_at	DR1	1810	0.000979613	0.0335692
208322_s_at	ST3GAL1	6482	0.000980099	0.0335692
201809_s_at	ENG	2022	0.000981141	0.0335692
212177_at	SFRS18	25957	0.000982218	0.0335692
221830_at	RAP2A	5911	0.000984287	0.0335882
205756_s_at	F8	2157	0.000996603	0.0339563
200689_x_at	EEF1G	1937	0.0010068	0.0342345
201542_at	SAR1A	56681	0.00100919	0.0342345
206928_at	ZNF124	7678	0.00100939	0.0342345
42361_g_at	CCHCR1	54535	0.00101508	0.034375
203519_s_at	UPF2	26019	0.00102142	0.0345371
201681_s_at	DLG5	9231	0.00102385	0.0345666
209291_at	ID4	3400	0.00104026	0.0349347
219188_s_at	MACROD1	28992	0.0010405	0.0349347
208881_x_at	IDI1	3422	0.00104094	0.0349347
206941_x_at	SEMA3E	9723	0.00104161	0.0349347
209035_at	MDK	4192	0.00104393	0.0349347
215206_at	NA	NA	0.00104575	0.0349347
207197_at	ZIC3	7547	0.00104576	0.0349347
215870_s_at	PLA2G5	5322	0.00104965	0.0349946
216580_at	RPL7	6129	0.00105133	0.0349946
221664_s_at	F11R	50848	0.00105228	0.0349946
217784_at	YKT6	10652	0.00105701	0.0350442
203012_x_at	RPL23A	6147	0.00105704	0.0350442
218333_at	DERL2	51009	0.0010585	0.0350442
209538_at	ZNF32	7580	0.00106818	0.0353118
218146_at	GLT8D1	55830	0.00108624	0.03585
214490_at	ARSF	416	0.00108768	0.03585
207803_s_at	CSN3	1448	0.00109188	0.0359174
213271_s_at	DOPEY1	23033	0.00109499	0.0359174
221824_s_at	MARCH8	220972	0.00109601	0.0359174
40148_at	APBB2	323	0.00109799	0.0359174
210135_s_at	SHOX2	6474	0.00109912	0.0359174
218200_s_at	NDUFB2	4708	0.00110252	0.0359174
218753_at	XKR8	55113	0.00110265	0.0359174
203599_s_at	WBP4	11193	0.00110266	0.0359174
211328_x_at	HFE	3077	0.00110635	0.0359847
200078_s_at	ATP6V0B	533	0.00111022	0.036028
211138_s_at	KMO	8564	0.00111211	0.036028
219678_x_at	DCLRE1C	64421	0.00111451	0.036028
208661_s_at	TTC3	7267	0.00111588	0.036028
220028_at	ACVR2B	93	0.00111734	0.036028
205273_s_at	PITRM1	10531	0.00111741	0.036028
216546_s_at	CHI3L1	1116	0.00112139	0.0361038
221623_at	BCAN	63827	0.0011266	0.0362191
209445_x_at	C7orf44	55744	0.0011329	0.0363691
214394_x_at	EEF1D	1936	0.00114059	0.036563
206201_s_at	MEOX2	4223	0.00115548	0.0368932
202105_at	IGBP1	3476	0.00115564	0.0368932
209939_x_at	CFLAR	8837	0.00115587	0.0368932
206114_at	EPHA4	2043	0.00115828	0.0369169
203202_at	KRR1	11103	0.00117103	0.0372699
201980_s_at	RSU1	6251	0.0011784	0.0374125
200837_at	BCAP31	10134	0.00117888	0.0374125
209969_s_at	STAT1	6772	0.00118325	0.0374976
203594_at	RTCD1	8634	0.00119109	0.0376413
209274_s_at	ISCA1	81689	0.00119195	0.0376413
209177_at	NDUFAF3	25915	0.00119343	0.0376413
200705_s_at	EEF1B2	1933	0.00119456	0.0376413
212593_s_at	PDCD4	27250	0.00119901	0.037728
200888_s_at	RPL23	9349	0.00120184	0.0377636
212502_at	ADO	84890	0.00121045	0.0379301
216236_s_at	NA	NA	0.00121055	0.0379301
209307_at	SWAP70	23075	0.00121826	0.0380828
209496_at	RARRES2	5919	0.00122053	0.0380828
200899_s_at	MGEA5	10724	0.00122212	0.0380828
204174_at	ALOX5AP	241	0.00122369	0.0380828
218217_at	SCPEP1	59342	0.00122558	0.0380828
206874_s_at	NA	NA	0.00122571	0.0380828
201937_s_at	DNPEP	23549	0.00122807	0.0381028
202137_s_at	ZMYND11	10771	0.00123135	0.0381228
211628_x_at	FTHL5	2509	0.00123291	0.0381228
213564_x_at	LDHB	3945	0.00123485	0.0381228
206578_at	NKX2-5	1482	0.00123558	0.0381228
213464_at	NA	NA	0.00124442	0.0383211
201042_at	TGM2	7052	0.00124546	0.0383211
218885_s_at	GALNT12	79695	0.00124742	0.0383284
210524_x_at	NA	NA	0.00125818	0.0385833
212713_at	MFAP4	4239	0.00125919	0.0385833
208905_at	CYCS	54205	0.0012629	0.0386057
221567_at	NOL3	8996	0.00126339	0.0386057
207526_s_at	IL1RL1	9173	0.00127095	0.0387102
218553_s_at	KCTD15	79047	0.00127334	0.0387102
210913_at	CDH20	28316	0.00127363	0.0387102
200071_at	SMNDC1	10285	0.0012743	0.0387102
217937_s_at	HDAC7	51564	0.00127553	0.0387102
216039_at	NA	NA	0.00127823	0.0387393
219147_s_at	C9orf95	54981	0.00128059	0.0387578
219547_at	COX15	1355	0.00128611	0.0388719
202912_at	ADM	133	0.00129622	0.0390991
206275_s_at	MICAL2	9645	0.00129928	0.0390991
212677_s_at	CEP68	23177	0.00129975	0.0390991
206087_x_at	HFE	3077	0.00130066	0.0390991
218839_at	HEY1	23462	0.00131425	0.0394064
216843_x_at	PMS2L1	5379	0.00131501	0.0394064
212086_x_at	LMNA	4000	0.00131621	0.0394064
209905_at	HOXA9	3205	0.00132167	0.03942
209864_at	FRAT2	23401	0.00132191	0.03942
201761_at	MTHFD2	10797	0.00132199	0.03942
214761_at	ZNF423	23090	0.00132558	0.0394207
212359_s_at	KIAA0913	23053	0.00132617	0.0394207
218802_at	CCDC109B	55013	0.00132933	0.0394207
204880_at	MGMT	4255	0.00132972	0.0394207
204879_at	PDPN	10630	0.00133088	0.0394207
206615_s_at	ADAM22	53616	0.00133748	0.0395555
208527_x_at	HIST1H2BE	8344	0.00134048	0.0395555
212089_at	LMNA	4000	0.00134204	0.0395555
200034_s_at	RPL6	6128	0.00134256	0.0395555
214003_x_at	RPS20	6224	0.00136054	0.0400324
218451_at	CDCP1	64866	0.00136539	0.040122
200032_s_at	RPL9	6133	0.00136908	0.0401771
203946_s_at	ARG2	384	0.00137306	0.0402408
210964_s_at	GYG2	8908	0.00137626	0.0402814
207012_at	MMP16	4325	0.0013794	0.0402823
221752_at	SSH1	54434	0.00137991	0.0402823
219687_at	HHAT	55733	0.00138346	0.0403229
221689_s_at	PIGP	51227	0.0013861	0.0403229
218731_s_at	VWA1	64856	0.00138675	0.0403229
206611_at	C2orf27A	29798	0.00139026	0.0403364
213153_at	SETD1B	23067	0.0013947	0.0403364
212221_x_at	IDS	3423	0.00139533	0.0403364
209164_s_at	CYB561	1534	0.00139729	0.0403364
216383_at	NA	NA	0.00140011	0.0403364
221893_s_at	ADCK2	90956	0.00140175	0.0403364
218510_x_at	FAM134B	54463	0.00140253	0.0403364
217379_at	RPL10	6134	0.00140316	0.0403364
218806_s_at	VAV3	10451	0.00140356	0.0403364
59433_at	NA	NA	0.00141033	0.0404787
203423_at	RBP1	5947	0.00141335	0.040513
201764_at	TMEM106C	79022	0.00141938	0.0406336
212989_at	SGMS1	259230	0.00142239	0.0406601
206684_s_at	ATF7	11016	0.00142397	0.0406601
203424_s_at	IGFBP5	3488	0.00143621	0.0409062
205201_at	GLI3	2737	0.00143628	0.0409062
207112_s_at	GAB1	2549	0.00144537	0.0411127
208870_x_at	ATP5C1	509	0.00145245	0.0412125
220173_at	C14orf45	80127	0.00145459	0.0412125
213050_at	COBL	23242	0.00145506	0.0412125
206200_s_at	ANXA11	311	0.00145631	0.0412125
213617_s_at	C18orf10	25941	0.00145858	0.0412243
206391_at	RARRES1	5918	0.0014684	0.041393
207057_at	SLC16A7	9194	0.00146861	0.041393
204496_at	STRN3	29966	0.00147099	0.041393
215116_s_at	DNM1	1759	0.00147224	0.041393
217282_at	MAN1A2	10905	0.00147516	0.041393
202431_s_at	MYC	4609	0.00147572	0.041393
219117_s_at	FKBP11	51303	0.00148601	0.0415662
219569_s_at	TMEM22	80723	0.00148963	0.0415662
219046_s_at	PKNOX2	63876	0.00149	0.0415662
203072_at	MYO1E	4643	0.00149041	0.0415662
209940_at	PARP3	10039	0.0014923	0.0415662
219052_at	HPS6	79803	0.00149313	0.0415662
213978_at	MTSS1L	92154	0.00149626	0.0416013
219258_at	TIPIN	54962	0.00149934	0.0416348
201846_s_at	RYBP	23429	0.00150482	0.0416528
202158_s_at	CELF2	10659	0.00150767	0.0416528
213075_at	OLFML2A	169611	0.00150842	0.0416528
218066_at	SLC12A7	10723	0.00150858	0.0416528
202071_at	SDC4	6385	0.00150936	0.0416528
213675_at	NA	NA	0.00151207	0.0416759
201468_s_at	NQO1	1728	0.00151632	0.0417265
214745_at	PLCH1	23007	0.00151767	0.0417265
204066_s_at	AGAP1	116987	0.00153443	0.0421346
207265_s_at	KDELR3	11015	0.00153766	0.0421346
203658_at	SLC25A20	788	0.00153957	0.0421346
217503_at	STK17B	9262	0.0015401	0.0421346
205208_at	ALDH1L1	10840	0.00155026	0.0423604
215065_at	PHF8	23133	0.00155577	0.0424588
204323_x_at	NF1	4763	0.0015599	0.0425192
221550_at	COX15	1355	0.00156546	0.0425674
200933_x_at	RPS4X	6191	0.0015655	0.0425674
200766_at	CTSD	1509	0.00157446	0.0427587
201422_at	IFI30	10437	0.00159944	0.0433841
202389_s_at	HTT	3064	0.00160287	0.0434241
204575_s_at	MMP19	4327	0.00161615	0.0436203
207103_at	KCND2	3751	0.00161872	0.0436203
214112_s_at	NA	NA	0.00161883	0.0436203
200678_x_at	GRN	2896	0.00161912	0.0436203
209525_at	HDGFRP3	50810	0.00161993	0.0436203
212473_s_at	MICAL2	9645	0.00162379	0.0436231
204745_x_at	MT1G	4495	0.00162396	0.0436231
212936_at	FAM172A	83989	0.00162623	0.0436312
202082_s_at	SEC14L1	6397	0.00164594	0.0440071
200099_s_at	RPS3A	6189	0.00164618	0.0440071
202711_at	EFNB1	1947	0.00164618	0.0440071
217562_at	FAM5C	339479	0.00165486	0.0441859
210423_s_at	SLC11A1	6556	0.00166143	0.044308
212115_at	HN1L	90861	0.00166516	0.0443142
210875_s_at	ZEB1	6935	0.00166565	0.0443142
202043_s_at	SMS	6611	0.0016772	0.044491
208502_s_at	PITX1	5307	0.00167767	0.044491
209987_s_at	ASCL1	429	0.00167884	0.044491
202671_s_at	PDXK	8566	0.001681	0.044491
57588_at	SLC24A3	57419	0.00168231	0.044491
204596_s_at	STC1	6781	0.00169048	0.044654
204254_s_at	VDR	7421	0.00169378	0.0446614
212052_s_at	TBC1D9B	23061	0.00169478	0.0446614
220324_at	C6orf155	79940	0.00169789	0.0446904
208856_x_at	RPLP0	6175	0.00170099	0.0447056
215881_x_at	NA	NA	0.0017025	0.0447056
203073_at	COG2	22796	0.00170916	0.0448201
213867_x_at	ACTB	60	0.00171226	0.0448201
212930_at	ATP2B1	490	0.00171413	0.0448201
202447_at	DECR1	1666	0.00171492	0.0448201
216247_at	NA	NA	0.00171884	0.0448696
218807_at	VAV3	10451	0.0017238	0.0449373
212169_at	FKBP9	11328	0.00172613	0.0449373
214020_x_at	ITGB5	3693	0.00172831	0.0449373
207014_at	GABRA2	2555	0.00173827	0.0449373
212734_x_at	RPL13	6137	0.00173852	0.0449373
212170_at	RBM12	10137	0.00173868	0.0449373
206453_s_at	NDRG2	57447	0.00173928	0.0449373
222183_x_at	SNW1	22938	0.0017394	0.0449373
221549_at	GRWD1	83743	0.00173964	0.0449373
209439_s_at	PHKA2	5256	0.00174542	0.0450344
210191_s_at	PHTF1	10745	0.00174864	0.0450649
222088_s_at	NA	NA	0.00175428	0.0451579
204398_s_at	EML2	24139	0.00175953	0.0452067
215765_at	LRRC41	10489	0.00176024	0.0452067
220216_at	C8orf44	56260	0.00176554	0.0452489
208734_x_at	RAB2A	5862	0.00176596	0.0452489
211747_s_at	LSM5	23658	0.00176805	0.0452502
219643_at	LRP1B	53353	0.00177284	0.0453205
218356_at	FTSJ2	29960	0.00178144	0.0454881
200651_at	GNB2L1	10399	0.00178495	0.0455026
210612_s_at	SYNJ2	8871	0.0017861	0.0455026
200916_at	TAGLN2	8407	0.00179022	0.0455551
214855_s_at	RALGAPA1	253959	0.0017926	0.0455636
214192_at	NUP88	4927	0.00180905	0.0457453
201415_at	GSS	2937	0.00180959	0.0457453
214042_s_at	RPL22	6146	0.0018102	0.0457453
213923_at	RAP2B	5912	0.00181156	0.0457453
221269_s_at	SH3BGRL3	83442	0.00181249	0.0457453
208832_at	ATXN10	25814	0.00181419	0.0457453
212264_s_at	WAPAL	23063	0.00181588	0.0457453
203860_at	PCCA	5095	0.00181762	0.0457453
214338_at	DNAJB12	54788	0.00181828	0.0457453
206825_at	OXTR	5021	0.00182425	0.0458111
207876_s_at	FLNC	2318	0.00182502	0.0458111
203475_at	CYP19A1	1588	0.00183165	0.0459256
44120_at	ADCK2	90956	0.00183951	0.0460597
206461_x_at	MT1H	4496	0.00184114	0.0460597
203898_at	NA	NA	0.00186017	0.0464832
220346_at	MTHFD2L	441024	0.0018663	0.0465735
208227_x_at	ADAM22	53616	0.00186797	0.0465735
200019_s_at	FAU	2197	0.00187708	0.0467482
213503_x_at	ANXA2	302	0.00188744	0.0469346
204004_at	PAWR	5074	0.00188879	0.0469346
216515_x_at	PTMA	5757	0.00189672	0.0469557
211765_x_at	PPIA	5478	0.00189779	0.0469557
220474_at	SLC25A21	89874	0.00189881	0.0469557
207758_at	NA	NA	0.00189996	0.0469557
214880_x_at	CALD1	800	0.00190021	0.0469557
213127_s_at	MED8	112950	0.00191312	0.0472222
200772_x_at	PTMA	5757	0.00191697	0.0472226
208891_at	DUSP6	1848	0.00191739	0.0472226
207370_at	IBSP	3381	0.00192506	0.0473383
204936_at	MAP4K2	5871	0.00192692	0.0473383
209050_s_at	RALGDS	5900	0.00192862	0.0473383
219232_s_at	EGLN3	112399	0.00193134	0.0473383
221480_at	HNRNPD	3184	0.00193375	0.0473383
205805_s_at	ROR1	4919	0.00193575	0.0473383
204405_x_at	DIMT1L	27292	0.001937	0.0473383
206662_at	GLRX	2745	0.00194091	0.0473816
214639_s_at	HOXA1	3198	0.00194325	0.0473868
217466_x_at	RPS2	6187	0.00194589	0.0473992
213366_x_at	ATP5C1	509	0.00195623	0.0475988
208607_s_at	NA	NA	0.0019608	0.0476195
221476_s_at	RPL15	6138	0.00196137	0.0476195
203650_at	PROCR	10544	0.00196584	0.0476759
211340_s_at	MCAM	4162	0.00196968	0.047717
201817_at	UBE3C	9690	0.00197272	0.0477338
202376_at	SERPINA3	12	0.00197669	0.0477338
210106_at	RDH5	5959	0.00197682	0.0477338
204441_s_at	POLA2	23649	0.00198103	0.0477834
204997_at	GPD1	2819	0.0019852	0.0478321
217952_x_at	PHF3	23469	0.00198873	0.0478653
203371_s_at	NDUFB3	4709	0.00199453	0.0479108
218796_at	FERMT1	55612	0.00199494	0.0479108
200706_s_at	LITAF	9516	0.00199939	0.0479448
222130_s_at	FTSJ2	29960	0.00200166	0.0479448
204324_s_at	GOLIM4	27333	0.00200283	0.0479448
49306_at	RASSF4	83937	0.00201684	0.0482283
219949_at	LRRC2	79442	0.00202209	0.0482651
1053_at	RFC2	5982	0.00202272	0.0482651
209251_x_at	TUBA1C	84790	0.00203361	0.0484728
213371_at	LDB3	11155	0.00203727	0.048508
213218_at	ZNF187	7741	0.00204071	0.0485379
209635_at	AP1S1	1174	0.00204534	0.048596
202863_at	SP100	6672	0.00204769	0.0485999
219196_at	SCG3	29106	0.00205814	0.0487679
212970_at	APBB2	323	0.00205916	0.0487679
219888_at	SPAG4	6676	0.00206447	0.0488414
206697_s_at	HP	3240	0.00206716	0.0488532
202421_at	IGSF3	3321	0.00207375	0.0489116
210554_s_at	CTBP2	1488	0.00207447	0.0489116
205185_at	SPINK5	11005	0.00207707	0.0489116
202172_at	VEZF1	7716	0.00207844	0.0489116
205690_s_at	BUD31	8896	0.00208367	0.0489371
213418_at	HSPA6	3310	0.00208605	0.0489371
201215_at	PLS3	5358	0.00208613	0.0489371
213616_at	C18orf10	25941	0.00208999	0.0489758
213954_at	FAM169A	26049	0.00209832	0.0491192
201049_s_at	RPS18	6222	0.00210706	0.0492248
212207_at	MED13L	23389	0.00210726	0.0492248
210304_at	PDE6B	5158	0.00211782	0.0494195
200781_s_at	RPS15A	6210	0.00212083	0.0494378
217142_at	NA	NA	0.00213057	0.0495413
220193_at	C1orf113	79729	0.00213445	0.0495413
204746_s_at	PICK1	9463	0.00213848	0.0495413
210094_s_at	PARD3	56288	0.00214162	0.0495413
217954_s_at	PHF3	23469	0.00214246	0.0495413
202763_at	CASP3	836	0.00214305	0.0495413
206392_s_at	RARRES1	5918	0.00214328	0.0495413
202734_at	TRIP10	9322	0.00214423	0.0495413
214834_at	PAR5	8123	0.00215207	0.0495413
213356_x_at	NA	NA	0.00215367	0.0495413
213596_at	CASP4	837	0.00215397	0.0495413
213084_x_at	RPL23A	6147	0.00215527	0.0495413
213794_s_at	NGDN	25983	0.00215619	0.0495413
217353_at	NA	NA	0.00215649	0.0495413
218104_at	TEX10	54881	0.00219461	0.0503087
221636_s_at	MOSC2	54996	0.00219712	0.0503087
201318_s_at	NA	NA	0.00219846	0.0503087
216304_x_at	YME1L1	10730	0.00219896	0.0503087
210427_x_at	ANXA2	302	0.00222325	0.0508122
212992_at	AHNAK2	113146	0.00222978	0.0508694
220532_s_at	TMEM176B	28959	0.00223033	0.0508694
201987_at	MED13	9969	0.00224099	0.0510602
202208_s_at	ARL4C	10123	0.00224491	0.051097
208941_s_at	SEPHS1	22929	0.00224796	0.0511139
215691_x_at	HSPB11	51668	0.00225431	0.051206
205675_at	MTTP	4547	0.00228145	0.0517697
209641_s_at	ABCC3	8714	0.00228658	0.0518329
207680_x_at	PAX3	5077	0.00229241	0.0519043
219371_s_at	KLF2	10365	0.0022944	0.0519043
200771_at	LAMC1	3915	0.00229896	0.0519546
214209_s_at	ABCB9	23457	0.00230427	0.0520218
209615_s_at	PAK1	5058	0.00230765	0.052045
218180_s_at	EPS8L2	64787	0.00231197	0.0520883
201944_at	HEXB	3074	0.00231425	0.0520883
205352_at	SERPINI1	5274	0.00231953	0.0521542
219336_s_at	ASCC1	51008	0.00232331	0.0521864
207869_s_at	CACNA1G	8913	0.00233564	0.0524103
218823_s_at	KCTD9	54793	0.00234532	0.0525745
212350_at	TBC1D1	23216	0.00235048	0.052637
202649_x_at	RPS19	6223	0.00236357	0.0528769
58916_at	KCTD14	65987	0.00237092	0.0529878
203059_s_at	PAPSS2	9060	0.00237698	0.0530699
213644_at	CCDC46	201134	0.00238558	0.0532084
219991_at	SLC2A9	56606	0.00238898	0.0532308
221816_s_at	PHF11	51131	0.00240221	0.053472
207992_s_at	AMPD3	272	0.00240596	0.0535019
202854_at	HPRT1	3251	0.0024175	0.0537047
213762_x_at	RBMX	27316	0.00242135	0.0537261
213187_x_at	FTL	2512	0.0024233	0.0537261
207938_at	PI15	51050	0.00243254	0.0538772
207373_at	HOXD10	3236	0.00244806	0.0541669
203907_s_at	IQSEC1	9922	0.00245505	0.0542211
217691_x_at	SLC16A3	9123	0.00245539	0.0542211
201110_s_at	THBS1	7057	0.00245861	0.0542384
221872_at	RARRES1	5918	0.00246433	0.0543106
221946_at	C9orf116	138162	0.00246829	0.0543441
217106_x_at	DIMT1L	27292	0.00247705	0.0544828
211241_at	ANXA2P3	305	0.00247961	0.0544853
212472_at	MICAL2	9645	0.00249511	0.0547716
207583_at	ABCD2	225	0.00250103	0.0548473
200986_at	SERPING1	710	0.00250422	0.0548631
209068_at	HNRPDL	9987	0.00250788	0.0548892
210203_at	CNOT4	4850	0.00251801	0.0550179
203595_s_at	IFIT5	24138	0.00251871	0.0550179
211720_x_at	RPLP0	6175	0.00252459	0.0550922
201892_s_at	IMPDH2	3615	0.00254473	0.0554771
203449_s_at	TERF1	7013	0.00254879	0.0555112
213997_at	FAM189A1	23359	0.00255283	0.0555386
219990_at	E2F8	79733	0.00255505	0.0555386
202907_s_at	NBN	4683	0.00256752	0.0555669
219487_at	BBS10	79738	0.00256821	0.0555669
213800_at	CFH	3075	0.00256823	0.0555669
202518_at	BCL7B	9275	0.00256853	0.0555669
205176_s_at	ITGB3BP	23421	0.00256886	0.0555669
201188_s_at	ITPR3	3710	0.00257148	0.0555695
206335_at	GALNS	2588	0.00257708	0.0556363
221759_at	G6PC3	92579	0.00258021	0.0556499
200620_at	TMEM59	9528	0.00258355	0.0556678
221746_at	UBL4A	8266	0.00259334	0.0558247
210534_s_at	B9D1	27077	0.00260128	0.0559358
221790_s_at	LDLRAP1	26119	0.00260354	0.0559358
208469_s_at	NA	NA	0.00260805	0.0559785
203570_at	LOXL1	4016	0.00261129	0.0559941
205376_at	INPP4B	8821	0.00261753	0.0560738
216274_s_at	SEC11A	23478	0.00262029	0.0560786
212828_at	SYNJ2	8871	0.00263404	0.0562976
206202_at	MEOX2	4223	0.00263619	0.0562976
211955_at	IPO5	3843	0.00263812	0.0562976
202417_at	KEAP1	9817	0.00264696	0.0563204
213477_x_at	EEF1A1	1915	0.00264803	0.0563204
219194_at	SEMA4G	57715	0.00264865	0.0563204
214351_x_at	RPL13	6137	0.00264933	0.0563204
203706_s_at	FZD7	8324	0.00265978	0.0564641
217820_s_at	ENAH	55740	0.00266117	0.0564641
205700_at	HSD17B6	8630	0.00267999	0.0568091
218331_s_at	C10orf18	54906	0.00269666	0.057094
219894_at	MAGEL2	54551	0.00269857	0.057094
218949_s_at	QRSL1	55278	0.00270273	0.0571277
220291_at	GDPD2	54857	0.00272345	0.0575108
201020_at	YWHAH	7533	0.00272831	0.0575587
221607_x_at	ACTG1	71	0.00273378	0.0576145
222266_at	C19orf2	8725	0.00273614	0.0576145
218941_at	FBXW2	26190	0.00275216	0.057897
219618_at	IRAK4	51135	0.002757	0.0579439
212451_at	SECISBP2L	9728	0.00276203	0.0579947
219099_at	C12orf5	57103	0.00276887	0.0580834
218952_at	PCSK1N	27344	0.00277688	0.0581965
220272_at	BNC2	54796	0.00278278	0.0582654
210697_at	ZNF257	113835	0.00279571	0.058481
206261_at	ZNF239	8187	0.00280718	0.0586235
219347_at	NUDT15	55270	0.00280781	0.0586235
208281_x_at	NA	NA	0.00281311	0.0586614
204981_at	SLC22A18	5002	0.00281738	0.0586614
210878_s_at	KDM3B	51780	0.00281754	0.0586614
205552_s_at	OAS1	4938	0.00282938	0.0588527
209892_at	FUT4	2526	0.00285123	0.059219
204234_s_at	ZNF195	7748	0.00285232	0.059219
221041_s_at	SLC17A5	26503	0.00286691	0.0594663
203344_s_at	RBBP8	5932	0.00287289	0.0595348
222227_at	NA	NA	0.00288128	0.0596529
200765_x_at	CTNNA1	1495	0.00288934	0.0597105
222108_at	AMIGO2	347902	0.00288943	0.0597105
220739_s_at	CNNM3	26505	0.00289462	0.0597563
203164_at	SLC33A1	9197	0.00289703	0.0597563
209292_at	ID4	3400	0.00290331	0.0598303
222128_at	NSUN6	221078	0.00291692	0.060055
213228_at	PDE8B	8622	0.0029217	0.0600977
208647_at	FDFT1	2222	0.00293091	0.0602314
201525_at	APOD	347	0.00294396	0.0604437
206031_s_at	USP5	8078	0.00295099	0.060532
203888_at	THBD	7056	0.00295562	0.0605711
219230_at	TMEM100	55273	0.00296442	0.0606954
206304_at	MYBPH	4608	0.00299131	0.061097
204698_at	ISG20	3669	0.00299172	0.061097
218889_at	NOC3L	64318	0.00299228	0.061097
204031_s_at	PCBP2	5094	0.00300362	0.0612722
209383_at	NA	NA	0.00301853	0.0615099
208949_s_at	LGALS3	3958	0.00302287	0.0615099
209750_at	NR1D2	9975	0.00302358	0.0615099
210017_at	MALT1	10892	0.00302998	0.0615838
203113_s_at	EEF1D	1936	0.00303442	0.0616177
207868_at	CHRNA2	1135	0.00304639	0.0618041
220244_at	LOH3CR2A	29931	0.00306902	0.0621602
212335_at	GNS	2799	0.00307019	0.0621602
202692_s_at	UBTF	7343	0.00307391	0.0621602
206495_s_at	HINFP	25988	0.00307513	0.0621602
219808_at	SCLY	51540	0.00307833	0.0621683
204996_s_at	CDK5R1	8851	0.00308987	0.0623447
208823_s_at	CDK16	5127	0.00309862	0.0624645
205747_at	CBLN1	869	0.00310773	0.0625473
212223_at	IDS	3423	0.00310923	0.0625473
218407_x_at	NENF	29937	0.00311118	0.0625473
203110_at	PTK2B	2185	0.00311826	0.0625914
218934_s_at	HSPB7	27129	0.003119	0.0625914
211949_s_at	NOLC1	9221	0.00312718	0.0626987
205211_s_at	RIN1	9610	0.00314687	0.0630368
219471_at	C13orf18	80183	0.00315053	0.0630532
214390_s_at	BCAT1	586	0.00317017	0.0633891
212243_at	NA	NA	0.00317542	0.0634123
207723_s_at	KLRC3	3823	0.00317728	0.0634123
219282_s_at	TRPV2	51393	0.00318247	0.0634123
209577_at	PCYT2	5833	0.00318561	0.0634123
215896_at	NA	NA	0.00318942	0.0634123
221700_s_at	UBA52	7311	0.00319278	0.0634123
214803_at	NA	NA	0.00319406	0.0634123
202499_s_at	SLC2A3	6515	0.00319701	0.0634123
210512_s_at	VEGFA	7422	0.00319702	0.0634123
214866_at	PLAUR	5329	0.00320579	0.0635296
201286_at	SDC1	6382	0.00321689	0.0636927
208806_at	CHD3	1107	0.00323645	0.0640229
210157_at	C19orf2	8725	0.00326219	0.0644728
209270_at	LAMB3	3914	0.00326653	0.0644728
211514_at	DSTYK	25778	0.0032679	0.0644728
218068_s_at	ZNF672	79894	0.00327123	0.0644812
206698_at	XK	7504	0.00328163	0.0645781
206308_at	TRDMT1	1787	0.00328196	0.0645781
200817_x_at	RPS10	6204	0.00328782	0.0646363
213214_x_at	ACTG1	71	0.00329689	0.0647572
204608_at	ASL	435	0.00330008	0.0647626
217786_at	PRMT5	10419	0.00331099	0.0649194
215886_x_at	USP12	219333	0.00331861	0.0649681
215309_at	ZNF674	641339	0.00331932	0.0649681
209395_at	CHI3L1	1116	0.00334175	0.0652922
214460_at	LSAMP	4045	0.00334176	0.0652922
200737_at	PGK1	5230	0.00335463	0.0654623
212598_at	WDFY3	23001	0.00335641	0.0654623
209151_x_at	TCF3	6929	0.00335986	0.0654623
202497_x_at	SLC2A3	6515	0.00336225	0.0654623
218341_at	PPCS	79717	0.00337009	0.0655574
205729_at	OSMR	9180	0.00337883	0.0656395
204119_s_at	ADK	132	0.00338022	0.0656395
219738_s_at	PCDH9	5101	0.00338415	0.0656585
220086_at	IKZF5	64376	0.00339982	0.065905
203554_x_at	PTTG1	9232	0.0034073	0.0659889
210355_at	PTHLH	5744	0.0034101	0.0659889
205323_s_at	MTF1	4520	0.00342676	0.0662537
208864_s_at	TXN	7295	0.00343	0.0662587
212154_at	SDC2	6383	0.00343504	0.0662716
208205_at	PCDHA9	9752	0.00343664	0.0662716
214028_x_at	TDRD3	81550	0.00346131	0.0666896
203367_at	DUSP14	11072	0.00347382	0.0668726
220387_s_at	HHLA3	11147	0.00347941	0.0669153
202862_at	FAH	2184	0.00348206	0.0669153
211422_at	TRPM3	80036	0.00348524	0.0669183
201600_at	PHB2	11331	0.00349707	0.0670876
201033_x_at	RPLP0	6175	0.00350218	0.0671276
219920_s_at	GMPPB	29925	0.0035059	0.0671409
209409_at	GRB10	2887	0.00351164	0.0671929
218717_s_at	LEPREL1	55214	0.0035213	0.0672916
211764_s_at	UBE2D1	7321	0.00352285	0.0672916
200088_x_at	RPL12	6136	0.0035291	0.0673531
212107_s_at	DHX9	1660	0.00353501	0.0674079
214985_at	EXT1	2131	0.00355017	0.0675877
217553_at	NA	NA	0.00355052	0.0675877
209306_s_at	SWAP70	23075	0.00356189	0.067727
212179_at	SFRS18	25957	0.00356872	0.067727
203614_at	UTP14C	9724	0.00356965	0.067727
214039_s_at	LAPTM4B	55353	0.00357004	0.067727
210139_s_at	PMP22	5376	0.0035867	0.067985
205199_at	CA9	768	0.00359374	0.0680604
210992_x_at	FCGR2C	9103	0.00361085	0.0683262
212065_s_at	USP34	9736	0.00361996	0.0684101
201842_s_at	EFEMP1	2202	0.00362332	0.0684101
221078_s_at	CCDC88A	55704	0.00362452	0.0684101
210815_s_at	CALCRL	10203	0.00362878	0.0684324
209354_at	TNFRSF14	8764	0.00364207	0.0685779
204615_x_at	IDI1	3422	0.00364267	0.0685779
219736_at	TRIM36	55521	0.00366815	0.0689379
209263_x_at	TSPAN4	7106	0.00367024	0.0689379
202498_s_at	SLC2A3	6515	0.00367209	0.0689379
207565_s_at	MR1	3140	0.00367421	0.0689379
201810_s_at	SH3BP5	9467	0.00367788	0.0689486
220966_x_at	ARPC5L	81873	0.00368225	0.0689723
214279_s_at	NDRG2	57447	0.00369054	0.0690693
213375_s_at	N4BP2L1	90634	0.00369513	0.069097
201616_s_at	CALD1	800	0.00370905	0.069299
207690_at	ALX3	257	0.00371285	0.0693117
205662_at	B9D1	27077	0.00371833	0.0693453
218185_s_at	ARMC1	55156	0.00372089	0.0693453
202450_s_at	CTSK	1513	0.00372692	0.0693727
203401_at	PRPS2	5634	0.00372861	0.0693727
212835_at	FAM175B	23172	0.00374171	0.0694318
215571_at	NA	NA	0.00374173	0.0694318
203895_at	PLCB4	5332	0.00374179	0.0694318
200091_s_at	RPS25	6230	0.00374737	0.0694318
212483_at	NIPBL	25836	0.00374741	0.0694318
201844_s_at	RYBP	23429	0.00375072	0.0694353
204071_s_at	TOPORS	10210	0.00376151	0.069577
203696_s_at	RFC2	5982	0.00376638	0.0696091
201341_at	ENC1	8507	0.00377093	0.0696353
204279_at	PSMB9	5698	0.00377684	0.0696865
206302_s_at	NA	NA	0.00378827	0.0697933
219044_at	THNSL2	55258	0.00378891	0.0697933
207662_at	TBX1	6899	0.00380682	0.070065
218918_at	MAN1C1	57134	0.00381325	0.0700864
200763_s_at	RPLP1	6176	0.00381565	0.0700864
221474_at	MYL12B	103910	0.00381744	0.0700864
210035_s_at	NA	NA	0.00382384	0.0701459
212505_s_at	KIAA0892	23383	0.00383452	0.0702838
203797_at	VSNL1	7447	0.00384022	0.0703301
202959_at	MUT	4594	0.00385424	0.0705288
214375_at	NA	NA	0.00386549	0.0706764
53991_at	DENND2A	27147	0.00387898	0.0708195
203887_s_at	THBD	7056	0.00387969	0.0708195
219800_s_at	THNSL1	79896	0.0038932	0.0709881
210978_s_at	TAGLN2	8407	0.00389532	0.0709881
207813_s_at	FDXR	2232	0.00390469	0.071045
205290_s_at	BMP2	650	0.00390483	0.071045
215643_at	NA	NA	0.00391878	0.0712404
207393_at	HCRTR2	3062	0.00392681	0.0713279
221858_at	TBC1D12	23232	0.00393241	0.0713578
204452_s_at	FZD1	8321	0.00393488	0.0713578
222163_s_at	SPATA5L1	79029	0.00394051	0.0714016
211412_at	PADI4	23569	0.00395424	0.071592
213203_at	SNAPC5	10302	0.0039705	0.0718279
217564_s_at	CPS1	1373	0.00398236	0.0719839
214047_s_at	MBD4	8930	0.00399703	0.0721903
222154_s_at	SPATS2L	26010	0.00400387	0.072229
205138_s_at	UST	10090	0.00400568	0.072229
35820_at	GM2A	2760	0.00402113	0.0723261
203220_s_at	TLE1	7088	0.00402158	0.0723261
208579_x_at	NA	NA	0.00402233	0.0723261
203705_s_at	FZD7	8324	0.00402408	0.0723261
206083_at	BAI1	575	0.004035	0.0724636
209124_at	MYD88	4615	0.00403863	0.0724703
212754_s_at	MON2	23041	0.00404437	0.0725147
216903_s_at	CBARA1	10367	0.0040559	0.0726628
205921_s_at	SLC6A6	6533	0.00406099	0.0726901
40640_at	NCAPH2	29781	0.00406397	0.0726901
203006_at	INPP5A	3632	0.00407494	0.0727904
206745_at	HOXC11	3227	0.00407613	0.0727904
205060_at	PARG	8505	0.0040991	0.0730883
214349_at	NA	NA	0.00410471	0.0730883
208443_x_at	SHOX2	6474	0.00410579	0.0730883
201877_s_at	PPP2R5C	5527	0.0041086	0.0730883
217927_at	SPCS1	28972	0.00410985	0.0730883
200918_s_at	SRPR	6734	0.00411271	0.0730883
204681_s_at	RAPGEF5	9771	0.00411685	0.0730883
211177_s_at	TXNRD2	10587	0.00412165	0.0730883
202297_s_at	RER1	11079	0.00412298	0.0730883
214271_x_at	RPL12	6136	0.00412571	0.0730883
220734_s_at	GLTPD1	80772	0.00413765	0.0732178
208733_at	RAB2A	5862	0.00414184	0.0732178
212870_at	SOS2	6655	0.00414291	0.0732178
209500_x_at	NA	NA	0.00415131	0.0733079
210671_x_at	MAPK8	5599	0.00415844	0.0733196
221935_s_at	C3orf64	285203	0.00416061	0.0733196
219854_at	ZNF14	7561	0.00416188	0.0733196
212583_at	AQR	9716	0.00418298	0.0735756
51228_at	RBM12B	389677	0.00418303	0.0735756
216933_x_at	APC	324	0.00420165	0.0738073
222284_at	NA	NA	0.00420515	0.0738073
210255_at	RAD51L1	5890	0.00421139	0.0738073
209461_x_at	WDR18	57418	0.00421241	0.0738073
218821_at	NPEPL1	79716	0.00421282	0.0738073
213864_s_at	NAP1L1	4673	0.00422964	0.0740182
209815_at	PTCH1	5727	0.00423225	0.0740182
212453_at	KIAA1279	26128	0.00423485	0.0740182
209112_at	CDKN1B	1027	0.00424094	0.0740665
206289_at	HOXA4	3201	0.00424623	0.0741005
211700_s_at	TRO	7216	0.00426408	0.0743007
210589_s_at	GBAP1	2630	0.00426439	0.0743007
215166_at	IGSF9B	22997	0.00427885	0.0744942
209782_s_at	DBP	1628	0.00429274	0.0746775
218586_at	C20orf20	55257	0.004305	0.0748322
205965_at	BATF	10538	0.00431504	0.0749264
219526_at	C14orf169	79697	0.00431835	0.0749264
212875_s_at	C2CD2	25966	0.00432054	0.0749264
209176_at	SEC23IP	11196	0.00432534	0.0749511
203516_at	SNTA1	6640	0.00433257	0.0749642
212824_at	FUBP3	8939	0.00433284	0.0749642
221558_s_at	LEF1	51176	0.00435081	0.0751056
203987_at	FZD6	8323	0.00435114	0.0751056
212657_s_at	IL1RN	3557	0.00435116	0.0751056
222132_s_at	AGK	55750	0.0043654	0.0752443
211386_at	MGC12488	84786	0.00436596	0.0752443
202366_at	ACADS	35	0.00437757	0.0752979
219001_s_at	DCAF10	79269	0.0043776	0.0752979
216804_s_at	PDLIM5	10611	0.00437924	0.0752979
201257_x_at	RPS3A	6189	0.00438581	0.0753525
208834_x_at	RPL23A	6147	0.00439797	0.075503
212316_at	NUP210	23225	0.00440622	0.0755862
218159_at	DDRGK1	65992	0.00441127	0.0756094
204107_at	NFYA	4800	0.00441438	0.0756094
205638_at	BAI3	577	0.00442807	0.0757599
200061_s_at	RPS24	6229	0.00442998	0.0757599
219353_at	NHLRC2	374354	0.00443998	0.0758724
203184_at	FBN2	2201	0.00444698	0.0759337
206469_x_at	AKR7A3	22977	0.00446498	0.0761514
201668_x_at	MARCKS	4082	0.00446659	0.0761514
210886_x_at	TP53TG1	11257	0.00451221	0.0768702
203910_at	ARHGAP29	9411	0.00451825	0.076914
219215_s_at	SLC39A4	55630	0.00453023	0.077059
64408_s_at	CALML4	91860	0.00453517	0.077069
209976_s_at	CYP2E1	1571	0.00454113	0.077069
211375_s_at	ILF3	3609	0.00454123	0.077069
219352_at	HERC6	55008	0.00455415	0.0770858
206042_x_at	NA	NA	0.00455881	0.0770858
204255_s_at	VDR	7421	0.00456053	0.0770858
201170_s_at	BHLHE40	8553	0.00456178	0.0770858
33323_r_at	SFN	2810	0.00456215	0.0770858
204724_s_at	COL9A3	1299	0.00456622	0.0770858
222067_x_at	HIST1H2BD	3017	0.00456733	0.0770858
203964_at	NMI	9111	0.00456997	0.0770858
219933_at	GLRX2	51022	0.00458222	0.0772337
201798_s_at	MYOF	26509	0.00460055	0.0774585
203411_s_at	LMNA	4000	0.00460446	0.0774585
221290_s_at	MUM1	84939	0.00460936	0.0774585
214862_x_at	NA	NA	0.00460978	0.0774585
204908_s_at	BCL3	602	0.00461299	0.0774585
208664_s_at	TTC3	7267	0.00462069	0.0775291
219923_at	TRIM45	80263	0.00462665	0.0775706
209325_s_at	RGS16	6004	0.00465231	0.0779331
32837_at	AGPAT2	10555	0.00465918	0.0779331
201536_at	DUSP3	1845	0.00466212	0.0779331
208029_s_at	LAPTM4B	55353	0.00466542	0.0779331
219757_s_at	C14orf101	54916	0.00466581	0.0779331
205894_at	ARSE	415	0.00467233	0.0779833
202117_at	ARHGAP1	392	0.00467862	0.0780297
218999_at	TMEM140	55281	0.00468313	0.0780464
212571_at	CHD8	57680	0.00470723	0.0783764
208673_s_at	SFRS3	6428	0.00470999	0.0783764
219361_s_at	AEN	64782	0.00471366	0.0783787
219575_s_at	NA	NA	0.00473244	0.0783844
211395_x_at	FCGR2C	9103	0.00473324	0.0783844
202548_s_at	ARHGEF7	8874	0.00473923	0.0783844
44783_s_at	HEY1	23462	0.00473983	0.0783844
203325_s_at	COL5A1	1289	0.00474294	0.0783844
220901_at	GPR157	80045	0.004743	0.0783844
210327_s_at	AGXT	189	0.00474329	0.0783844
209644_x_at	CDKN2A	1029	0.00474345	0.0783844
204529_s_at	TOX	9760	0.00474576	0.0783844
221919_at	HNRNPA1	3178	0.00476421	0.0786307
208693_s_at	GARS	2617	0.0047709	0.0786827
210695_s_at	WWOX	51741	0.00477973	0.0787655
221011_s_at	LBH	81606	0.00478301	0.0787655
209310_s_at	CASP4	837	0.00478753	0.0787815
201173_x_at	NUDC	10726	0.00479667	0.0788734
215071_s_at	HIST1H2AC	8334	0.00480689	0.0789148
201927_s_at	PKP4	8502	0.00481303	0.0789148
213512_at	C14orf79	122616	0.00481946	0.0789148
214543_x_at	QKI	9444	0.00482254	0.0789148
201609_x_at	ICMT	23463	0.00482349	0.0789148
202730_s_at	PDCD4	27250	0.00482403	0.0789148
202201_at	BLVRB	645	0.00482511	0.0789148
208950_s_at	ALDH7A1	501	0.0048276	0.0789148
208767_s_at	LAPTM4B	55353	0.00483471	0.0789728
214770_at	MSR1	4481	0.004869	0.0794554
89476_r_at	NPEPL1	79716	0.00487141	0.0794554
203710_at	ITPR1	3708	0.00489976	0.0798593
217107_at	NA	NA	0.00490533	0.0798914
206384_at	CACNG3	10368	0.00491833	0.0800445
204921_at	GAS8	2622	0.00494723	0.0804256
205481_at	ADORA1	134	0.00494899	0.0804256
222216_s_at	MRPL17	63875	0.00497919	0.0808572
201051_at	ANP32A	8125	0.00500391	0.0811993
202777_at	SHOC2	8036	0.0050169	0.0813507
212519_at	UBE2E1	7324	0.00502366	0.0814009
202175_at	CHPF	79586	0.00503352	0.0815012
213286_at	ZFR	51663	0.00504045	0.081554
201712_s_at	RANBP2	5903	0.00505585	0.0816711
220979_s_at	ST6GALNAC5	81849	0.00505739	0.0816711
215570_s_at	NA	NA	0.00505872	0.0816711
205357_s_at	AGTR1	185	0.00507045	0.0818011
204655_at	CCL5	6352	0.00507556	0.0818241
221926_s_at	IL17RC	84818	0.00508299	0.0818844
212268_at	SERPINB1	1992	0.00510333	0.0821526
213836_s_at	WIPI1	55062	0.00510973	0.0821959
202971_s_at	DYRK2	8445	0.00511455	0.082214
218097_s_at	CUEDC2	79004	0.00512897	0.0823119
214167_s_at	NA	NA	0.00513035	0.0823119
204224_s_at	GCH1	2643	0.00513176	0.0823119
210422_x_at	SLC11A1	6556	0.00514057	0.0823937
213046_at	PABPN1	8106	0.00515311	0.0825132
208640_at	RAC1	5879	0.00515545	0.0825132
202284_s_at	CDKN1A	1026	0.00516006	0.0825152
219561_at	COPZ2	51226	0.005163	0.0825152
200092_s_at	RPL37	6167	0.00517276	0.0826033
213960_at	NTRK3	4916	0.00517595	0.0826033
221874_at	KIAA1324	57535	0.00518305	0.0826572
214820_at	BRWD1	54014	0.00518952	0.082701
210463_x_at	TRMT1	55621	0.00520107	0.0827149
204990_s_at	ITGB4	3691	0.00520213	0.0827149
205403_at	IL1R2	7850	0.00520748	0.0827149
213422_s_at	MXRA8	54587	0.00520765	0.0827149
209584_x_at	APOBEC3C	27350	0.00521566	0.0827149
213410_at	C10orf137	26098	0.00521594	0.0827149
202869_at	OAS1	4938	0.00521646	0.0827149
65591_at	WDR48	57599	0.00522562	0.0828011
205597_at	SLC44A4	80736	0.00523129	0.0828318
212817_at	DNAJB5	25822	0.00523747	0.0828707
205641_s_at	TRADD	8717	0.00525069	0.0829769
212346_s_at	MXD4	10608	0.00525384	0.0829769
204588_s_at	SLC7A7	9056	0.00525817	0.0829769
206976_s_at	HSPH1	10808	0.00525913	0.0829769
33304_at	ISG20	3669	0.00526772	0.083011
222171_s_at	PKNOX2	63876	0.00526876	0.083011
220147_s_at	FAM60A	58516	0.00527885	0.083111
212322_at	SGPL1	8879	0.00528515	0.0831513
211681_s_at	PDLIM5	10611	0.00529092	0.0831832
221778_at	JHDM1D	80853	0.00529644	0.083209
212787_at	YLPM1	56252	0.00530509	0.083209
221577_x_at	NA	NA	0.0053074	0.083209
207437_at	NOVA1	4857	0.00530916	0.083209
201097_s_at	ARF4	378	0.00531621	0.083209
219749_at	SH2D4A	63898	0.00531778	0.083209
212470_at	SPAG9	9043	0.00531878	0.083209
213151_s_at	SEPT7	989	0.00534279	0.0835258
209100_at	IFRD2	7866	0.00535093	0.0835942
32128_at	CCL18	6362	0.0053644	0.0837457
218484_at	NDUFA4L2	56901	0.00537928	0.083919
221087_s_at	APOL3	80833	0.00540448	0.0841768
214665_s_at	CHP	11261	0.0054066	0.0841768
200747_s_at	NUMA1	4926	0.00540717	0.0841768
204609_at	CCDC85B	11007	0.00541281	0.0842055
201522_x_at	NA	NA	0.0054166	0.0842056
211048_s_at	PDIA4	9601	0.00543503	0.0843917
209257_s_at	SMC3	9126	0.00543617	0.0843917
213998_s_at	DDX17	10521	0.00544427	0.0844229
210889_s_at	FCGR2B	2213	0.00544578	0.0844229
212028_at	RBM25	58517	0.00545493	0.0844629
205633_s_at	ALAS1	211	0.00545596	0.0844629
208660_at	CS	1431	0.00547687	0.0847275
202470_s_at	CPSF6	11052	0.00548114	0.0847346
218292_s_at	PRKAG2	51422	0.00549283	0.0848562
203997_at	PTPN3	5774	0.0055071	0.085001
212336_at	EPB41L1	2036	0.00550986	0.085001
218959_at	HOXC10	3226	0.00551978	0.0850949
220246_at	CAMK1D	57118	0.00552696	0.0851466
212433_x_at	RPS2	6187	0.00553405	0.0851968
206331_at	CALCRL	10203	0.00554338	0.0852813
222140_s_at	NA	NA	0.00554797	0.0852928
201572_x_at	DCTD	1635	0.0055654	0.0855017
220949_s_at	C7orf49	78996	0.00556956	0.0855064
216014_s_at	NA	NA	0.00558876	0.0856883
212236_x_at	KRT17	3872	0.00558912	0.0856883
210834_s_at	PTGER3	5733	0.00560593	0.0858847
212355_at	KHNYN	23351	0.0056111	0.0858847
208769_at	EIF4EBP2	1979	0.00561397	0.0858847
202589_at	TYMS	7298	0.00561739	0.0858847
210477_x_at	MAPK8	5599	0.00563577	0.0860876
200838_at	CTSB	1508	0.00564283	0.0860876
209882_at	RIT1	6016	0.00564297	0.0860876
219720_s_at	C14orf118	55668	0.00564995	0.0860876
203145_at	SPAG5	10615	0.00565004	0.0860876
205380_at	PDZK1	5174	0.00566232	0.0862077
209592_s_at	DCAF7	10238	0.00566795	0.0862077
219360_s_at	TRPM4	54795	0.00567025	0.0862077
200717_x_at	RPL7	6129	0.00567345	0.0862077
216499_at	NA	NA	0.0056818	0.0862405
216038_x_at	DAXX	1616	0.00568534	0.0862405
202446_s_at	PLSCR1	5359	0.00569028	0.0862405
221744_at	DCAF7	10238	0.00569113	0.0862405
218338_at	PHC1	1911	0.0056991	0.0863024
211219_s_at	LHX2	9355	0.00570886	0.0863597
218950_at	ARAP3	64411	0.00571066	0.0863597
211701_s_at	TRO	7216	0.00573164	0.086618
218812_s_at	ORAI2	80228	0.00573957	0.0866788
209803_s_at	PHLDA2	7262	0.00575054	0.0867855
220441_at	DNAJC22	79962	0.00575471	0.0867894
218137_s_at	SMAP1	60682	0.00576102	0.0868258
219863_at	HERC5	51191	0.00579006	0.0872042
201439_at	GBF1	8729	0.00580005	0.0872954
208929_x_at	RPL13	6137	0.00581359	0.08744
219762_s_at	RPL36	25873	0.00582023	0.0874807
208952_s_at	LARP4B	23185	0.00583094	0.0875824
209875_s_at	SPP1	6696	0.00584908	0.0877298
214132_at	ATP5C1	509	0.00585193	0.0877298
216992_s_at	GRM8	2918	0.0058526	0.0877298
221280_s_at	PARD3	56288	0.00587994	0.088027
220956_s_at	EGLN2	112398	0.00588035	0.088027
204569_at	ICK	22858	0.00588726	0.08806
217749_at	COPG	22820	0.00589048	0.08806
205074_at	SLC22A5	6584	0.00590561	0.088102
200741_s_at	RPS27	6232	0.00590641	0.088102
207983_s_at	STAG2	10735	0.00590832	0.088102
220144_s_at	ANKRD5	63926	0.00590916	0.088102
204062_s_at	ULK2	9706	0.00594293	0.0884949
205711_x_at	ATP5C1	509	0.00594348	0.0884949
215307_at	ZNF529	57711	0.00594788	0.0885011
204335_at	CCDC94	55702	0.00598396	0.0888983
218284_at	SMAD3	4088	0.00598961	0.0888983
40837_at	TLE2	7089	0.00599639	0.0888983
221566_s_at	NOL3	8996	0.00599737	0.0888983
208815_x_at	HSPA4	3308	0.00599777	0.0888983
213258_at	TFPI	7035	0.00600047	0.0888983
205874_at	ITPKA	3706	0.0060081	0.0888983
218983_at	C1RL	51279	0.00601175	0.0888983
204900_x_at	SAP30	8819	0.00601426	0.0888983
212036_s_at	PNN	5411	0.00601459	0.0888983
204881_s_at	UGCG	7357	0.00602701	0.0890226
213382_at	NA	NA	0.00603582	0.0890806
202867_s_at	DNAJB12	54788	0.00604178	0.0890806
220664_at	SPRR2C	6702	0.00604297	0.0890806
209121_x_at	NR2F2	7026	0.0060751	0.0894646
203242_s_at	PDLIM5	10611	0.00607707	0.0894646
214945_at	NA	NA	0.00610006	0.0896866
215068_s_at	FBXL18	80028	0.00610022	0.0896866
211081_s_at	MAP4K5	11183	0.00611732	0.0897606
218324_s_at	SPATS2	65244	0.00612063	0.0897606
205452_at	PIGB	9488	0.00612594	0.0897606
208612_at	PDIA3	2923	0.00612738	0.0897606
219915_s_at	SLC16A10	117247	0.00613195	0.0897606
201857_at	ZFR	51663	0.00613627	0.0897606
201392_s_at	IGF2R	3482	0.00613709	0.0897606
215837_x_at	NA	NA	0.00613758	0.0897606
207508_at	ATP5G3	518	0.00614413	0.0897973
202638_s_at	ICAM1	3383	0.00616802	0.0899754
210615_at	NRP1	8829	0.00617026	0.0899754
222301_at	C1orf61	10485	0.00617375	0.0899754
219760_at	LIN7B	64130	0.00617516	0.0899754
205028_at	TRO	7216	0.00617657	0.0899754
212967_x_at	NAP1L1	4673	0.00618269	0.0900055
221188_s_at	CIDEB	27141	0.00619231	0.0900438
204518_s_at	PPIC	5480	0.00619351	0.0900438
204517_at	PPIC	5480	0.00619748	0.0900438
222161_at	NAALAD2	10003	0.00622031	0.0902794
212185_x_at	MT2A	4502	0.00622424	0.0902794
206367_at	REN	5972	0.00622589	0.0902794
213926_s_at	AGFG1	3267	0.0062434	0.0904735
203317_at	PSD4	23550	0.00625143	0.0904735
215323_at	LUZP2	338645	0.00625149	0.0904735
221707_s_at	VPS53	55275	0.00627396	0.0907396
215008_at	TLL2	7093	0.00629734	0.0910185
201642_at	IFNGR2	3460	0.00630212	0.0910284
204552_at	INPP4A	3631	0.00631513	0.091157
204027_s_at	METTL1	4234	0.00634285	0.0914977
213642_at	NA	NA	0.00635313	0.0915309
203793_x_at	PCGF2	7703	0.00635339	0.0915309
211326_x_at	HFE	3077	0.00636034	0.0915715
211623_s_at	FBL	2091	0.00637036	0.0916564
204262_s_at	PSEN2	5664	0.00638184	0.0916976
209267_s_at	SLC39A8	64116	0.00638523	0.0916976
216850_at	SNRPN	6638	0.00638591	0.0916976
219434_at	TREM1	54210	0.00638973	0.0916976
200008_s_at	GDI2	2665	0.0064116	0.091952
208398_s_at	TBPL1	9519	0.00641703	0.0919705
213411_at	NA	NA	0.00642141	0.0919739
210347_s_at	BCL11A	53335	0.0064328	0.0920393
208240_s_at	FGF1	2246	0.00643426	0.0920393
219956_at	GALNT6	11226	0.00645182	0.0921653
222026_at	RBM3	5935	0.00645713	0.0921653
214995_s_at	NA	NA	0.00645874	0.0921653
205325_at	PHYHIP	9796	0.00645966	0.0921653
205493_s_at	DPYSL4	10570	0.00646832	0.0922296
203300_x_at	AP1S2	8905	0.00647994	0.0922652
209436_at	SPON1	10418	0.00648153	0.0922652
214173_x_at	C19orf2	8725	0.00648327	0.0922652
204933_s_at	TNFRSF11B	4982	0.00649875	0.0923689
215547_at	TSC22D2	9819	0.00650944	0.0923689
200017_at	RPS27A	6233	0.00652023	0.0923689
214914_at	FAM13C	220965	0.00652326	0.0923689
202200_s_at	SRPK1	6732	0.00652354	0.0923689
218557_at	NIT2	56954	0.00652673	0.0923689
211227_s_at	PCDH11Y	83259	0.00652794	0.0923689
208893_s_at	DUSP6	1848	0.00653169	0.0923689
213052_at	PRKAR2A	5576	0.0065326	0.0923689
205936_s_at	HK3	3101	0.0065361	0.0923689
217529_at	ORAI2	80228	0.0065363	0.0923689
212482_at	RMND5A	64795	0.00654708	0.0924352
213007_at	FANCI	55215	0.00654932	0.0924352
205718_at	ITGB7	3695	0.00655528	0.0924607
205858_at	NGFR	4804	0.00657904	0.0926736
213117_at	KLHL9	55958	0.00658376	0.0926736
205540_s_at	RRAGB	10325	0.00658633	0.0926736
216867_s_at	PDGFA	5154	0.00658707	0.0926736
203724_s_at	RUFY3	22902	0.00660301	0.0927994
201184_s_at	CHD4	1108	0.00660436	0.0927994
216932_at	NA	NA	0.00661351	0.0928692
219593_at	SLC15A3	51296	0.00661802	0.0928739
214370_at	S100A8	6279	0.00662803	0.09292
202197_at	MTMR3	8897	0.00662967	0.09292
38149_at	ARHGAP25	9938	0.00663683	0.0929617
212666_at	SMURF1	57154	0.00665963	0.0932055
220559_at	EN1	2019	0.00666591	0.0932055
204851_s_at	DCX	1641	0.00666682	0.0932055
219913_s_at	CRNKL1	51340	0.00667685	0.0932537
210021_s_at	CCNO	10309	0.00667867	0.0932537
200065_s_at	ARF1	375	0.00668715	0.0933067
217600_at	SCUBE3	222663	0.00669086	0.0933067
219331_s_at	KLHDC8A	55220	0.00671361	0.0935651
203243_s_at	PDLIM5	10611	0.0067201	0.0935969
212074_at	NA	NA	0.00672647	0.093627
219992_at	TAC3	6866	0.00673435	0.0936779
212798_s_at	ANKMY2	57037	0.00676296	0.0940171
216129_at	ATP9A	10079	0.00678026	0.0941986
208226_x_at	ADAM22	53616	0.00679593	0.0943572
201325_s_at	EMP1	2012	0.00681738	0.0945959
203397_s_at	GALNT3	2591	0.00683483	0.0947788
216555_at	C22orf30	253143	0.00685011	0.0949315
205141_at	ANG	283	0.00686235	0.0950246
217223_s_at	BCR	613	0.00686538	0.0950246
201282_at	OGDH	4967	0.00687253	0.0950603
209515_s_at	RAB27A	5873	0.00687652	0.0950603
205896_at	SLC22A4	6583	0.00688375	0.0950946
220202_s_at	RC3H2	54542	0.00689149	0.0950946
205210_at	TGFBRAP1	9392	0.00689184	0.0950946
201862_s_at	LRRFIP1	9208	0.00690563	0.0952257
216177_at	NA	NA	0.00691402	0.0952822
204920_at	CPS1	1373	0.00693706	0.0954951
217659_at	NA	NA	0.00694302	0.0954951
209326_at	SLC35A2	7355	0.0069493	0.0954951
216008_s_at	ARIH2	10425	0.00695188	0.0954951
211762_s_at	KPNA2	3838	0.00695459	0.0954951
222259_s_at	SPO11	23626	0.00695526	0.0954951
201920_at	SLC20A1	6574	0.0069633	0.0955464
200752_s_at	CAPN1	823	0.00697002	0.0955796
212501_at	CEBPB	1051	0.00697755	0.0956239
212763_at	CAMSAP1L1	23271	0.0069919	0.0957614
221911_at	ETV1	2115	0.00703435	0.0962769
201405_s_at	COPS6	10980	0.0070382	0.0962769
211755_s_at	ATP5F1	515	0.00705733	0.0964791
217999_s_at	PHLDA1	22822	0.00706724	0.0965552
216988_s_at	PTP4A2	8073	0.00707935	0.0966118
207224_s_at	SIGLEC7	27036	0.00708008	0.0966118
212055_at	C18orf10	25941	0.00709583	0.0967673
203291_at	CNOT4	4850	0.00710196	0.0967914
222335_at	NA	NA	0.00714512	0.09732
200950_at	ARPC1A	10552	0.00715157	0.0973482
213709_at	BHLHB9	80823	0.00715845	0.0973655
215342_s_at	RABGAP1L	9910	0.00716213	0.0973655
215572_at	LOC646934	646934	0.00716919	0.0973655
200910_at	CCT3	7203	0.00717185	0.0973655
210292_s_at	NA	NA	0.00717779	0.0973655
221916_at	NEFL	4747	0.00717915	0.0973655
220390_at	AGBL2	79841	0.00719868	0.0975709
209675_s_at	HNRNPUL1	11100	0.00724241	0.0981037
220050_at	C9orf9	11092	0.0072561	0.0981791
206154_at	RLBP1	6017	0.00725681	0.0981791
222374_at	BTRC	8945	0.00726182	0.0981871
218554_s_at	ASH1L	55870	0.00727164	0.0982137
221445_at	OR1A2	26189	0.00727494	0.0982137
205472_s_at	DACH1	1602	0.00727706	0.0982137
209111_at	RNF5	6048	0.00729433	0.0983871
214808_at	NA	NA	0.00730573	0.098481
214359_s_at	HSP90AB1	3326	0.00732258	0.0986483
213061_s_at	NTAN1	123803	0.00732737	0.0986531
217979_at	TSPAN13	27075	0.00735429	0.0988751
203532_x_at	CUL5	8065	0.00736206	0.0988751
203488_at	LPHN1	22859	0.00736396	0.0988751
208021_s_at	RFC1	5981	0.00737654	0.0988751
213147_at	HOXA10	3206	0.00738155	0.0988751
208410_x_at	AMELX	265	0.00738221	0.0988751
204597_x_at	STC1	6781	0.00738266	0.0988751
211226_at	GALR2	8811	0.0073856	0.0988751
219078_at	GPATCH2	55105	0.00738699	0.0988751
212043_at	TGOLN2	10618	0.0073923	0.0988751
210780_at	ESR2	2100	0.00739282	0.0988751
221880_s_at	FAM174B	400451	0.00740083	0.098911
208752_x_at	NAP1L1	4673	0.00740441	0.098911
216233_at	CD163	9332	0.00741286	0.0989644
214797_s_at	CDK18	5129	0.00742227	0.0990304
203647_s_at	FDX1	2230	0.00743234	0.0991053
209095_at	DLD	1738	0.00744532	0.0992188
205743_at	STAC	6769	0.00745349	0.0992682
214317_x_at	RPS9	6203	0.00747068	0.0994151
210514_x_at	HLA-G	3135	0.00747348	0.0994151
209582_s_at	CD200	4345	0.00748156	0.0994631
212867_at	NA	NA	0.00749807	0.0996188
203504_s_at	ABCA1	19	0.00750224	0.0996188
38671_at	PLXND1	23129	0.00752196	0.0997501
204568_at	KIAA0831	22863	0.00752329	0.0997501
212302_at	RTF1	23168	0.00752637	0.0997501
218377_s_at	RWDD2B	10069	0.00753009	0.0997501
200872_at	S100A10	6281	0.00753802	0.0997956
204629_at	PARVB	29780	0.00755005	0.0998943
213405_at	RAB22A	57403	0.00755446	0.0998943
207174_at	GPC5	2262	0.00756383	0.0999586
213556_at	LOC390940	390940	0.0075735	0.100027
213305_s_at	PPP2R5C	5527	0.00758349	0.10005
220115_s_at	CDH10	1008	0.00758425	0.10005
203324_s_at	CAV2	858	0.0075906	0.100074
206730_at	GRIA3	2892	0.00760827	0.100248
209723_at	SERPINB9	5272	0.00762106	0.1003
217908_s_at	DCAF6	55827	0.00762128	0.1003
214077_x_at	MEIS3P1	4213	0.00762612	0.100305
218309_at	CAMK2N1	55450	0.00763392	0.100348
206644_at	NR0B1	190	0.00766184	0.100655
220769_s_at	WDR78	79819	0.00766953	0.100697
208166_at	MMP16	4325	0.0076741	0.100697
210438_x_at	TROVE2	6738	0.00769164	0.100752
218998_at	C9orf6	54942	0.00769279	0.100752
202836_s_at	TXNL4A	10907	0.00769291	0.100752
213139_at	SNAI2	6591	0.00769643	0.100752
214203_s_at	PRODH	5625	0.00773237	0.101163
212743_at	RCHY1	25898	0.00775561	0.101407
214966_at	GRIK5	2901	0.00776169	0.101427
220277_at	CXXC4	80319	0.00779419	0.101676
212488_at	COL5A1	1289	0.00779769	0.101676
219157_at	KLHL2	11275	0.00779879	0.101676
218936_s_at	CCDC59	29080	0.00779903	0.101676
221593_s_at	RPL31	6160	0.00782703	0.101981
218629_at	SMO	6608	0.00784448	0.102148
200958_s_at	SDCBP	6386	0.00785624	0.102242
217712_at	LOC389906	389906	0.00787548	0.102432
205289_at	BMP2	650	0.00788164	0.102452
204464_s_at	EDNRA	1909	0.0078878	0.102464
209155_s_at	NT5C2	22978	0.00789175	0.102464
206857_s_at	FKBP1B	2281	0.00790528	0.10254
216960_s_at	ZNF133	7692	0.0079069	0.10254
208399_s_at	EDN3	1908	0.00792839	0.102585
212402_at	ZC3H13	23091	0.00792989	0.102585
220122_at	MCTP1	79772	0.00793561	0.102585
218149_s_at	ZNF395	55893	0.00794053	0.102585
201968_s_at	PGM1	5236	0.00794264	0.102585
207261_at	CNGA3	1261	0.00794312	0.102585
204591_at	CHL1	10752	0.00794687	0.102585
210907_s_at	PDCD10	11235	0.00794724	0.102585
204850_s_at	DCX	1641	0.00796928	0.102809
211811_s_at	PCDHA6	56142	0.00798128	0.102904
205668_at	LY75	4065	0.00800789	0.103095
203323_at	CAV2	858	0.00800797	0.103095
203628_at	IGF1R	3480	0.00801002	0.103095
35626_at	SGSH	6448	0.00801611	0.103114
212158_at	SDC2	6383	0.00803544	0.103294
209762_x_at	SP110	3431	0.008041	0.103294
215388_s_at	NA	NA	0.00804596	0.103294
208237_x_at	ADAM22	53616	0.00804867	0.103294
204831_at	CDK8	1024	0.00806606	0.103457
200805_at	LMAN2	10960	0.00807077	0.103458
210060_at	PDE6G	5148	0.00808849	0.103625
210224_at	MR1	3140	0.00809811	0.103689
217953_at	PHF3	23469	0.00810635	0.103734
206621_s_at	EIF4H	7458	0.00812629	0.103929
219594_at	NINJ2	4815	0.00813503	0.103948
215706_x_at	ZYX	7791	0.00814061	0.103948
220141_at	C11orf63	79864	0.00814296	0.103948
200789_at	ECH1	1891	0.00814643	0.103948
209824_s_at	ARNTL	406	0.0081861	0.104394
212030_at	RBM25	58517	0.00819581	0.104458
212249_at	PIK3R1	5295	0.00820987	0.104577
211456_x_at	MT1P2	645745	0.00825563	0.10505
219877_at	ZMAT4	79698	0.0082565	0.10505
211947_s_at	BAT2L2	23215	0.00827295	0.1052
203535_at	S100A9	6280	0.00827825	0.105207
209817_at	PPP3CB	5532	0.00829911	0.105412
208645_s_at	RPS14	6208	0.00834816	0.105974
214596_at	CHRM3	1131	0.00836271	0.106098
217739_s_at	NAMPT	10135	0.00837248	0.106161
204329_s_at	ZNF202	7753	0.00838265	0.106178
217769_s_at	POMP	51371	0.00838336	0.106178
213078_x_at	LPCAT4	254531	0.00839167	0.106223
201996_s_at	SPEN	23013	0.0084011	0.106282
41553_at	OSGIN2	734	0.00842517	0.106525
216235_s_at	EDNRA	1909	0.00843719	0.106604
208833_s_at	ATXN10	25814	0.00844757	0.106604
208916_at	SLC1A5	6510	0.00845001	0.106604
218977_s_at	TRNAU1AP	54952	0.00845127	0.106604
216326_s_at	HDAC3	8841	0.0084554	0.106604
202852_s_at	AAGAB	79719	0.00846911	0.106676
203853_s_at	GAB2	9846	0.0084707	0.106676
208951_at	ALDH7A1	501	0.00848362	0.106761
221605_s_at	PIPOX	51268	0.00849253	0.106761
218225_at	ECSIT	51295	0.00849424	0.106761
211140_s_at	CASP2	835	0.00850081	0.106761
205498_at	GHR	2690	0.00850146	0.106761
212737_at	GM2A	2760	0.00853848	0.107102
218556_at	ORMDL2	29095	0.00854111	0.107102
209894_at	LEPR	3953	0.00854308	0.107102
214968_at	DDX51	317781	0.00856592	0.107235
213339_at	KIAA0495	57212	0.00856802	0.107235
208616_s_at	PTP4A2	8073	0.00856964	0.107235
210876_at	ANXA2P1	303	0.00857492	0.107235
209457_at	DUSP5	1847	0.00857786	0.107235
220685_at	FAM120C	54954	0.00863448	0.107829
212321_at	SGPL1	8879	0.00863508	0.107829
206342_x_at	IDS	3423	0.00864261	0.107855
215060_at	NA	NA	0.00864683	0.107855
212685_s_at	TBL2	26608	0.00865461	0.107891
212616_at	CHD9	80205	0.00866667	0.107981
209368_at	EPHX2	2053	0.00871116	0.108474
201429_s_at	RPL37A	6168	0.00872031	0.108504
209806_at	HIST1H2BK	85236	0.00872329	0.108504
207017_at	RAB27B	5874	0.00872979	0.108524
205286_at	TFAP2C	7022	0.00875591	0.108751
210569_s_at	SIGLEC9	27180	0.00875788	0.108751
213890_x_at	RPS16	6217	0.00878456	0.108943
221081_s_at	DENND2D	79961	0.00878638	0.108943
217752_s_at	CNDP2	55748	0.00878798	0.108943
216377_x_at	ALPPL2	251	0.00879496	0.108968
201258_at	RPS16	6217	0.00880496	0.109031
212357_at	FAM168A	23201	0.00882024	0.109065
58780_s_at	FLJ10357	55701	0.00882042	0.109065
218646_at	C4orf27	54969	0.00882243	0.109065
207347_at	ERCC6	2074	0.00884324	0.109262
202494_at	PPIE	10450	0.00885831	0.109336
203267_s_at	DRG2	1819	0.00885912	0.109336
213768_s_at	ASCL1	429	0.00886512	0.10935
212673_at	METAP1	23173	0.00887579	0.109421
216007_at	NA	NA	0.00891247	0.109812
207239_s_at	CDK16	5127	0.00893004	0.109852
202961_s_at	ATP5J2	9551	0.00893272	0.109852
213947_s_at	NUP210	23225	0.00893518	0.109852
210908_s_at	PFDN5	5204	0.00893936	0.109852
210149_s_at	ATP5H	10476	0.00894047	0.109852
210443_x_at	OGFR	11054	0.00896038	0.109977
222285_at	NA	NA	0.0089605	0.109977
202876_s_at	PBX2	5089	0.00897861	0.110137
220880_at	NA	NA	0.00898348	0.110137
200016_x_at	HNRNPA1	3178	0.00899422	0.110208
205970_at	MT3	4504	0.00902565	0.110528
220206_at	ZMYM1	79830	0.00903144	0.110528
210151_s_at	DYRK3	8444	0.00903889	0.110528
205335_s_at	SRP19	6728	0.00904027	0.110528
204081_at	NRGN	4900	0.00904886	0.110572
203606_at	NDUFS6	4726	0.00907782	0.110865
202310_s_at	COL1A1	1277	0.00908873	0.110916
208659_at	CLIC1	1192	0.00909293	0.110916
201963_at	ACSL1	2180	0.00909696	0.110916
202413_s_at	USP1	7398	0.0091148	0.11099
219570_at	KIF16B	55614	0.00911832	0.11099
219537_x_at	DLL3	10683	0.00912158	0.11099
217748_at	ADIPOR1	51094	0.00912298	0.11099
204228_at	PPIH	10465	0.00912866	0.110991
206965_at	KLF12	11278	0.00913312	0.110991
221104_s_at	NIPSNAP3B	55335	0.00914795	0.111041
201867_s_at	TBL1X	6907	0.00915161	0.111041
203912_s_at	DNASE1L1	1774	0.0091522	0.111041
212181_s_at	NA	NA	0.00916284	0.111075
219649_at	ALG6	29929	0.00917579	0.111075
219470_x_at	CCNJ	54619	0.0091776	0.111075
202866_at	DNAJB12	54788	0.00917972	0.111075
213704_at	RABGGTB	5876	0.00917999	0.111075
207785_s_at	RBPJ	3516	0.00919321	0.111134
220547_s_at	FAM35A	54537	0.00919492	0.111134
220991_s_at	RNF32	140545	0.00920953	0.111144
210546_x_at	NA	NA	0.00921554	0.111144
204775_at	CHAF1B	8208	0.00921768	0.111144
222212_s_at	LASS2	29956	0.00922122	0.111144
212313_at	CHMP7	91782	0.00922418	0.111144
206758_at	EDN2	1907	0.00923031	0.111144
52940_at	NA	NA	0.00923075	0.111144
202118_s_at	CPNE3	8895	0.0092541	0.111315
206191_at	ENTPD3	956	0.00925497	0.111315
208374_s_at	CAPZA1	829	0.00927464	0.111433
221065_s_at	CHST8	64377	0.00927947	0.111433
218816_at	LRRC1	55227	0.00928225	0.111433
219755_at	CBX8	57332	0.00928487	0.111433
208797_s_at	GOLGA8A	23015	0.00931391	0.111675
213826_s_at	NA	NA	0.00931507	0.111675
218450_at	HEBP1	50865	0.00933143	0.111811
203143_s_at	KIAA0040	9674	0.00934073	0.111862
218626_at	EIF4ENIF1	56478	0.00936049	0.112036
210802_s_at	DIMT1L	27292	0.00936852	0.112036
205454_at	HPCA	3208	0.00937035	0.112036
219519_s_at	SIGLEC1	6614	0.00938074	0.1121
213017_at	ABHD3	171586	0.00941971	0.112505
213813_x_at	NA	NA	0.0094438	0.112608
210461_s_at	ABLIM1	3983	0.00944916	0.112608
203080_s_at	BAZ2B	29994	0.00944929	0.112608
207857_at	LILRA2	11027	0.00945065	0.112608
201094_at	RPS29	6235	0.00945738	0.112608
208158_s_at	OSBPL1A	114876	0.0094588	0.112608
203586_s_at	ARL4D	379	0.00947505	0.112741
218580_x_at	AURKAIP1	54998	0.00948551	0.112756
218649_x_at	SDCCAG1	9147	0.00948918	0.112756
211202_s_at	KDM5B	10765	0.00949151	0.112756
216525_x_at	PMS2L3	5387	0.00951277	0.112948
202651_at	LPGAT1	9926	0.0095429	0.113245
205966_at	TAF13	6884	0.00955279	0.113293
206204_at	GRB14	2888	0.00955713	0.113293
205760_s_at	OGG1	4968	0.00958469	0.113543
219499_at	SEC61A2	55176	0.00959492	0.113543
200941_at	HSBP1	3281	0.00959679	0.113543
218996_at	TFPT	29844	0.0095986	0.113543
200852_x_at	GNB2	2783	0.00961522	0.113679
214430_at	GLA	2717	0.00962371	0.113718
217019_at	NA	NA	0.00968061	0.114279
219725_at	TREM2	54209	0.00968145	0.114279
201098_at	COPB2	9276	0.00968782	0.114294
202133_at	WWTR1	25937	0.00969553	0.114324
212675_s_at	CEP68	23177	0.00970868	0.114394
220718_at	C15orf34	80072	0.0097118	0.114394
200720_s_at	ACTR1A	10121	0.00975128	0.114798
221264_s_at	TARDBP	23435	0.00977064	0.114909
37424_at	CCHCR1	54535	0.00977309	0.114909
208695_s_at	RPL39	6170	0.0097762	0.114909
204269_at	PIM2	11040	0.00978638	0.114914
206359_at	SOCS3	9021	0.00978709	0.114914
220042_x_at	HIVEP3	59269	0.00979212	0.114914
219758_at	TTC26	79989	0.00981508	0.11508
203828_s_at	IL32	9235	0.00981666	0.11508
219151_s_at	NA	NA	0.009827	0.115081
207945_s_at	CSNK1D	1453	0.00983008	0.115081
200980_s_at	PDHA1	5160	0.00983667	0.115081
209438_at	PHKA2	5256	0.00983742	0.115081
212800_at	STX6	10228	0.00984618	0.115123
212500_at	ADO	84890	0.00985426	0.115156
202341_s_at	TRIM2	23321	0.00987141	0.115175
210039_s_at	PRKCQ	5588	0.00987311	0.115175
217882_at	TMEM111	55831	0.00987385	0.115175
208151_x_at	DDX17	10521	0.00987908	0.115175
200830_at	PSMD2	5708	0.0098818	0.115175
213165_at	CEP350	9857	0.00989721	0.115294
205339_at	STIL	6491	0.00991076	0.115392
204928_s_at	SLC10A3	8273	0.00993633	0.115629
201058_s_at	MYL9	10398	0.00998664	0.116154
205083_at	AOX1	316	0.010009	0.116353
219314_s_at	ZNF219	51222	0.0100167	0.116381
220391_at	ZBTB3	79842	0.010046	0.116617
210036_s_at	KCNH2	3757	0.0100518	0.116617
212613_at	BTN3A2	11118	0.0100527	0.116617
41512_at	BRAP	8315	0.0100703	0.11676
202905_x_at	NBN	4683	0.0100819	0.116824
204271_s_at	EDNRB	1910	0.0100864	0.116824
213011_s_at	TPI1	7167	0.0100924	0.116833
209621_s_at	PDLIM3	27295	0.0100991	0.116849
209596_at	MXRA5	25878	0.0101371	0.117228
222000_at	C1orf174	339448	0.0101461	0.117251
203052_at	C2	717	0.0101496	0.117251
205709_s_at	CDS1	1040	0.0101649	0.117366
219308_s_at	AK5	26289	0.0101846	0.117533
202458_at	PRSS23	11098	0.0101937	0.117576
217513_at	C17orf60	284021	0.0102089	0.117692
213971_s_at	NA	NA	0.0102264	0.117831
202550_s_at	VAPB	9217	0.0102435	0.117967
220697_at	NA	NA	0.0102702	0.118063
203697_at	FRZB	2487	0.0102732	0.118063
208405_s_at	CD164	8763	0.0102757	0.118063
44654_at	G6PC3	92579	0.010277	0.118063
211542_x_at	RPS10	6204	0.0102836	0.118063
207147_at	DLX2	1746	0.0102836	0.118063
220063_at	GSTCD	79807	0.0103045	0.118241
218791_s_at	C15orf29	79768	0.010315	0.1183
201549_x_at	KDM5B	10765	0.0103412	0.11854
203015_s_at	SSX2IP	117178	0.0103753	0.118869
201973_s_at	NA	NA	0.0103875	0.118948
205663_at	PCBP3	54039	0.010393	0.118949
218234_at	ING4	51147	0.010403	0.119003
200738_s_at	PGK1	5230	0.0104323	0.119276
205775_at	FAM50B	26240	0.0104384	0.119284
214452_at	BCAT1	586	0.0104544	0.119406
219143_s_at	RPP25	54913	0.0104804	0.119616
215138_s_at	RP1-21O18.1	23254	0.0104836	0.119616
212650_at	EHBP1	23301	0.0104956	0.119691
211872_s_at	RGS11	8786	0.0105386	0.119985
222099_s_at	LSM14A	26065	0.0105461	0.119985
209826_at	NA	NA	0.0105476	0.119985
204306_s_at	CD151	977	0.0105478	0.119985
204934_s_at	HPN	3249	0.0105532	0.119985
213275_x_at	CTSB	1508	0.0105568	0.119985
216431_at	NA	NA	0.0105591	0.119985
219676_at	ZSCAN16	80345	0.0105778	0.120136
205543_at	HSPA4L	22824	0.010585	0.120156
201550_x_at	ACTG1	71	0.010609	0.120367
51158_at	FAM174B	400451	0.0106182	0.12041
213801_x_at	RPSA	3921	0.01063	0.120427
213238_at	ATP10D	57205	0.0106306	0.120427
219272_at	TRIM62	55223	0.0106536	0.120627
212486_s_at	FYN	2534	0.0106655	0.12069
218144_s_at	INF2	64423	0.01067	0.12069
206347_at	PDK3	5165	0.0106806	0.120739
219731_at	FLJ34077	404033	0.0106853	0.120739
221710_x_at	FAM176B	55194	0.0107031	0.120879
201802_at	SLC29A1	2030	0.0107355	0.121132
211898_s_at	EPHB1	2047	0.0107364	0.121132
203506_s_at	MED12	9968	0.0107497	0.121178
218548_x_at	TEX264	51368	0.0107583	0.121178
208187_s_at	NA	NA	0.0107605	0.121178
208937_s_at	ID1	3397	0.0107623	0.121178
212143_s_at	IGFBP3	3486	0.0107758	0.12119
203492_x_at	CEP57	9702	0.0107771	0.12119
217897_at	FXYD6	53826	0.0107797	0.12119
201710_at	MYBL2	4605	0.0107984	0.121339
212296_at	PSMD14	10213	0.0108056	0.121358
204204_at	SLC31A2	1318	0.0108244	0.121507
207152_at	NTRK2	4915	0.010834	0.121554
218982_s_at	NA	NA	0.01084	0.121554
203086_at	KIF2A	3796	0.0108449	0.121554
216592_at	MAGEC3	139081	0.0108926	0.122027
207839_s_at	TMEM8B	51754	0.0109005	0.122054
216330_s_at	POU6F1	5463	0.0109152	0.122157
200815_s_at	PAFAH1B1	5048	0.0109508	0.122494
221729_at	COL5A2	1290	0.0109691	0.122636
201665_x_at	RPS17	6218	0.0109754	0.122645
203726_s_at	LAMA3	3909	0.0110007	0.122866
218818_at	FHL3	2275	0.0110131	0.122943
203884_s_at	RAB11FIP2	22841	0.0110234	0.122955
209587_at	PITX1	5307	0.0110252	0.122955
202131_s_at	RIOK3	8780	0.0110407	0.122967
204083_s_at	TPM2	7169	0.0110427	0.122967
221971_x_at	NA	NA	0.0110429	0.122967
201811_x_at	SH3BP5	9467	0.0110528	0.122973
200031_s_at	RPS11	6205	0.0110546	0.122973
212983_at	HRAS	3265	0.0110673	0.122989
[truncated: 20,217 more rows]
